# Supplementary material for: Vacuoles and peroxisomes are involved in Aspergillus fumigatus gliotoxin production and self-protection
Source: Research Square preprint supplement (doi:10.21203/rs.3.rs-2966047/v1), 2023-05-31
Supplement: Supplementary file 1 [file 0c1e772219d84f596b0ec300.xlsx]

## Sheet: Planilha1
Supplementary Table S2 - Protein kinase mutants
Gene	Description
AFUB_045810	Putative protein kinase
AFUB_030660	Serine threonine protein kinase, putative
AFUB_052450	Protein kinase, putative
AFUB_021710	pakA, Serine/threonine kinase Ste20
AFUB_053300	Protein kinase, putative
AFUB_012420	Mitogen-activated protein kinase (SakA)
AFUB_032300	Protein kinase, putative
AFUB_044560	Protein kinase, putative
AFUB_043130	MAP kinase kinase Ste7
AFUB_016170	Protein kinase (Lkh1), putative
AFUB_010510	kin1, predicted serine/threonine protein kinase
AFUB_018770	Non-specific serine/threonine protein kinase
AFUB_020560	Calcium/calmodulin-dependent protein kinase, putative
AFUB_029320	Calcium/calmodulin-dependent protein kinase, putative
AFUB_025560	Protein kinase (NpkA), putative
AFUB_038630	Protein serine/threonine kinase (Ran1), putative
AFUB_029240	Mitochondrial pyruvate dehydrogenase kinase, putative
AFUB_029820	Protein kinase, putative
AFUB_006780	schA, cAMP-dependent protein kinase-like, putative
AFUB_039620	Calcium/calmodulin dependent protein kinase, putative
AFUB_045840	Serine protein kinase, putative
AFUB_051750	Pyruvate dehydrogenase kinase, putative
AFUB_027640	Pyruvate dehydrogenase kinase
AFUB_038060	MAP kinase kinase kinase (Bck1), putative
AFUB_001600	Serine/threonine protein kinase, putative
AFUB_053500	Serine/threonine protein kinase, putative
AFUB_018600	Protein kinase, putative
AFUB_010360	MAP kinase kinase kinase SskB, putative
AFUB_044400	Uncharacterized protein
AFUB_035220	Ssn3, Cyclin-dependent protein kinase, putative
AFUB_019930	Serine/threonine protein kinase, putative
AFUB_017750	Protein kinase, putative
AFUB_027480	Protein kinase domain-containing protein
AFUB_030570	Protein kinase, putative
AFUB_053520	Calcium/calmodulin dependent protein kinase, putative
AFUB_039100	Serine/threonine protein kinase, putative
AFUB_007300	Serine/threonine protein kinase, putative
AFUB_014350	Serine/threonine protein kinase (Kin4), putative
AFUB_006320	Serine/threonine protein kinase, putative
AFUB_052630	Cyclin-dependent protein kinase PhoA
AFUB_011380	Protein kinase, putative
AFUB_071620	hypothetical protein
AFUB_056110	pkaC2, cAMP-dependent protein kinase catalytic subunit, putative
AFUB_082830	Serine/threonine protein kinase, putative
AFUB_027890	cAMP-dependent protein kinase catalytic subunit PkaC1
AFUB_056020	Serine/threonine protein kinase, putative
AFUB_059390	Protein kinase, putative
AFUB_059090	Serine/threonine protein kinase (Nrc-2), putative
AFUB_066150	atg1, putative Serine/threonine kinase
AFUB_090090	Serine/threonine protein kinase, putative
AFUB_078920	Casein kinase family protein
AFUB_077790	Protein kinase, putative
AFUB_078810	MpkB, Mitogen-activated protein kinase
AFUB_075210	Protein kinase, putative
AFUB_066030	Protein kinase, putative
AFUB_053960	MAP kinase kinase kinase Ste11/SteC
AFUB_070630	MpkA, Mitogen-activated protein kinase
AFUB_095720	Protein kinase, putative
AFUB_060320	Phosphotidylinositol kinase Tel1, putative
AFUB_087320	Protein kinase, putative
AFUB_079830	Uncharacterized protein
AFUB_078980	Protein kinase, putative
AFUB_056640	Mitogen-activated protein kinase
AFUB_074550	Protein kinase, putative
AFUB_071600	Serine/threonine-protein kinase
AFUB_087120	NACHT and Ankyrin domain protein
AFUB_075350	Uncharacterized protein
AFUB_054020	Serine/threonine protein kinase, putative
AFUB_081540	Protein kinase, putative
AFUB_055480	Serine/threonine protein kinase, putative
AFUB_098230	Inositol kinase kinase (UvsB), putative
AFUB_099170	Protein kinase Yak1, putative
AFUB_096030	Serine/threonine protein kinase (Kcc4), putative
AFUB_096080	Serine/threonine-protein kinase, putative
AFUB_099990	Serine protein kinase Sky1, putative
AFUB_006190	MAP kinase kinase (Mkk2), putative
AFUB_089280	Cell-cycle checkpoint protein kinase, putative
AFUB_101210	Sensor histidine kinase/response regulator, putative
AFUB_020650	Two-component osmosensing histidine kinase (Bos1), putative
AFUB_044260	Putative uncharacterized protein
AFUB_035990	Protein kinase domain-containing protein
AFUB_096660	Putative uncharacterized protein
AFUB_063270	Protein kinase Scy1, putative
AFUB_045550	Calcium/calmodulin dependent protein kinase, putative
AFUB_060950	Inositol hexaphosphate kinase KCS1, putative
AFUB_040390	Protein kinase domain-containing protein
AFUB_081220	Putative uncharacterized protein
AFUB_089460	Putative uncharacterized protein
AFUB_093800	Snf1 kinase complex beta-subunit Gal83, putative
AFUB_076300	Sensor histidine kinase/response regulator Fos-1
AFUB_075230	Sensor histidine kinase/response regulator, putative
AFUB_074100	Checkpoint protein kinase (SldA), putative
AFUB_067080	Putative uncharacterized protein
AFUB_001940	Sensor histidine kinase/response regulator, putative
AFUB_017740	Osmolarity two-component system protein sln1
AFUB_100220	Sensor histidine kinase/response regulator, putative
AFUB_036640	Sensor histidine kinase/response regulator, putative
AFUB_009070	Protein kinase family protein
AFUB_096590	Putative uncharacterized protein
AFUB_045710	Putative uncharacterized protein
AFUB_030290	Protein kinase domain-containing protein
AFUB_080040	Putative uncharacterized protein
AFUB_095050	Putative uncharacterized protein
AFUB_063830	Ubiquinone biosynthesis protein, putative
AFUB_101530	Sensor histidine kinase/response regulator, putative
AFUB_071990	N/A
AFUB_047210	Serine/threonine protein kinase, putative
AFUB_048440	Protein kinase, putative
AFUB_061120	Protein kinase domain-containing protein
