# Supplementary material for: Vacuoles and peroxisomes are involved in Aspergillus fumigatus gliotoxin production and self-protection
Source: Research Square preprint supplement (doi:10.21203/rs.3.rs-2966047/v1), 2023-05-31
Supplement: Supplementary file 2 [file 446c91b2e0e4c62a0603a5f9.docx]

**Supplementary Table S3 - Strains used in this work.**

| **Strain** | | **Genotype** | **Reference** |
| --- | --- | --- | --- |
| ***A. fumigatus*** |  | |  |
| A1163 | Δ*akuB pyrG+* | | [1] |
| CEA17 | Δ*akuB pyrG-* | | [1] |
| Δ*rglT* | *MAT1-1*; *delta* *rglT::hph* | | [2] |
| Δ*rglT*::*rglT* | *MAT1-1*; *delta rglT; delta rglT*::*rglT* | | [3] |
| ΔmpkA | ΔmpkA::hph | | [4] |
| ΔmpkB | Δ*mpkB::ptrA*; PTR | | [4] |
| ΔmpkC | ΔmpkC::hph | | [5] |
| ΔsakA ΔmpkC | Δ*mpkC::prtA* Δ*sakA::hph* | | [5] |
| ΔsakA | ΔsakA::hph | | [5] |
| GtmA:GFP | *GtmA:GFP::hph* | | [6] |
| GliT:GFP | *GliT:GFP::ble* | | [7] |
| GtmA:GFP mpkA:3xHA | *GtmA:GFP::prtA; mpkA:3xHA::pyrG* | | This work |
| GliT:GFP mpkA:3xHA | *GliT:GFP::prtA; mpkA:3xHA::pyrG* | | This work |
| GtmA:GFP Δ*mpkA* | *GtmA:GFP::prtA;* Δ*mpkA::pyrG* | | This work |
| GliT:GFP Δ*mpkA* | *GliT:GFP::prtA;* Δ*mpkA::pyrG* | | This work |
| Δpex E1 and ΔpexE2 | Δ*pexE::pyrG* | | This work |
| Δpex G1 and ΔpexG2 | Δ*pexE::pyrG* | | This work |
| ***A. nidulans*** |  | |  |
| AGB551 | *pyroA4, pyrG89,nkuAD::argB, veA+* | | [8] |
| ΔAN1368 (Δ*rglT*) | *delta AN1368::pyrG; argB2 delta-nkuA::argB; pyroA4; veA1* | | [3] |
| ΔAN1368::AN1368 | *delta AN1368; delta AN1368::AN1368; argB2 delta-nkuA::argB; veA1* | | [3] |
| Δpex E1 and ΔpexE2 | Δ*pexE::pyrG* | | This work |
| Δpex G1 and ΔpexG2 | Δ*pexE::pyrG* | | This work |

**References**

**1**. Da Silva Ferreira ME, Kress MR, Savoldi M, Goldman MH, Härtl A, Heinekamp T, Brakhage AA, et al. The akuB(KU80) mutant deficient for nonhomologous end joining is a powerful tool for analysing pathogenicity in Aspergillus fumigatus. Eukaryot Cell. 2006; 5:207-211.

**2**. Furukawa T, van Rhijn N, Fraczek M, Gsaller F, Davies E, Carr P, et al. The negative cofactor 2 complex is a key regulator of drug resistance in Aspergillus fumigatus. Nat Commun. 2020;11. doi:10.1038/s41467-019-14191-1.

**3**. Ries LNA, Pardeshi L, Dong Z, Tan K, Steenwyk JL, Colabardini AC, et al. The Aspergillus fumigatus transcription factor RglT is important for gliotoxin biosynthesis and self-protection, and virulence. PLoS Pathog. 2020; Jul 15;16(7):e1008645. doi: 10.1371/journal.ppat.1008645.

**4**. V. Valiante, R. Jain, T. Heinekamp, A.A. Brakhage The MpkA MAP kinase module regulates cell wall integrity signaling and pyomelanin formation in Aspergillus fumigatus Fungal Genet. Biol., 46 (12) (2009), pp. 909-918

**5.** Bruder Nascimento AC, Dos Reis TF, de Castro PA, Hori JI, Bom VL, de Assis LJ, Ramalho LN, Rocha MC, Malavazi I, Brown NA, Valiante V, Brakhage AA, Hagiwara D, Goldman GH. Mitogen activated protein kinases SakA(HOG1) and MpkC collaborate for Aspergillus fumigatus virulence. Mol Microbiol. 2016 Jun;100(5):841-59. doi: 10.1111/mmi.13354. Epub 2016 Mar 23. PMID: 26878695.

**6**. Dolan SK, Bock T, Hering V, Owens RA, Jones GW, Blankenfeldt W, Doyle S. Structural, mechanistic and functional insight into gliotoxin bis-thiomethylation in Aspergillus fumigatus. Open Biol. 2017 Feb;7(2):160292. doi: 10.1098/rsob.160292. PMID: 28179499; PMCID: PMC5356443.

**7.** Schrettl M, Carberry S, Kavanagh K, Haas H, Jones GW, O'Brien J, Nolan A, Stephens J, Fenelon O, Doyle S. Self-protection against gliotoxin--a component of the gliotoxin biosynthetic cluster, GliT, completely protects Aspergillus fumigatus against exogenous gliotoxin. PLoS Pathog. 2010 Jun 10;6(6):e1000952. doi: 10.1371/journal.ppat.1000952. PMID: 20548963; PMCID: PMC2883607.

**8**. Bayram ,O .,Bayram ,O.S.,Ahm ed,Y.L.,M aruyam a,J.,Valerius,O.,Rizzoli,S.O .,Ficner, R.,Irniger,S.,Braus,G.H., 2012. The Aspergillus nidulans MAPK module AnSte11- Ste50-Ste7-Fus3 controls development and secondary metabolism .PLoS Genet. 8,e1002816.
