# Supplementary material for: Vacuoles and peroxisomes are involved in Aspergillus fumigatus gliotoxin production and self-protection
Source: Research Square preprint supplement (doi:10.21203/rs.3.rs-2966047/v1), 2023-05-31
Supplement: Supplementary file 3 [file a7387b244730646ce61a66e8.docx]

**Supplementary Table S4 - List of primers used in this work.**

| Primer | Sequence 5’- 3’ |
| --- | --- |
|  |  |
| Afu5g06800 sybr fw | ACCTTGCTTGCAATCGACAG |
| Afu5g06800 sybr rv | TGCAGCAGAATGAGCAGGTAG |
| Afu8g07360 sybr fw | TTCGTGCACAGTTGGTTCTG |
| Afu8g07360 sybr rv | TTAATGAACGCGTGCGCATG |
| Afu5g03540 sybr fw | AAGTGTACACGCTCAACACG |
| Afu5g03540 sybr rv | TTCAGCACGATGTTGTACGC |
| Afu3g01750 sybr fw | ACACTCAGTCGCTACAACTACG |
| Afu3g01750 sybr rv | AACGCCGCAAAGAAGAGAAC |
| Afu6g10310 sybr fw | ATGCTGCGTATGCCAATGTC |
| Afu6g10310 sybr rv | TGCCATTGCACGCTATC |
| Afu1g10390 sybr fw | TTGGCGTGGCATTGTTGAAC |
| Afu1g10390 sybr rv | TCTGTGAAAGAGCGGATTCG |
| Afu6g12780 sybr fw | TTGCGGATAAGATGCATGGC |
| Afu6g12780 sybr rv | AACGCCATGTCAGGTTTGTC |
| Afu8g04630 sybr fw | TTGCCTTTGTTGCTGTCGTC |
| Afu8g04630 sybr rv | TAATAGTGGCCAGCGTGAACC |
| Afu5g01350 sybr fw | TGTTTATCGGTCCGTTTGCG |
| Afu5g01350 sybr rv | AGCACAAATCCCAGCAACAC |
| Afu7g065570 sybr fw | TTATTGCTGCGTTGGTGGTC |
| Afu7g065570 sybr rv | AGGAGGATCACGATCGCAATC |
| Afu_gliM sybr fw | CGATCTGTACCCCAACGAGT |
| Afu_gliM sybr rv  Afu_gliA sybr fw | CCCAGGGTCTTCTGGAACTT  TTTGCGATCAACGAACTCTG |
| Afu_gliA sybr rv | CCCTTGACGGACTGGAAGTA |
| Afu_gliH sybr fw | TTGCTGTCCTACCACGACAC |
| Afu_gliH sybr rv | CTTCTTCCGTTCCCGAATCT |
| Afu_gliG sybr fw | CTGATGTACATTGCCGATGC |
| Afu_gliG sybr rv | TTGTTTTGGGCAACTTCTCC |
| Afu_gliP sybr fw | CACAAGAGATGCGCCAGATA |
| Afu_gliP sybr rv | ATCATCGCCTCCATATCAGC |
| Afu_gliK sybr fw | CTCACGGCATACAGCGACTA |
| Afu_gliK sybr rv | ATAATCCAACCGAGCCACTG |
| Afu_gliC sybr fw | TTGTTTGGAGAGGTCCTTGG |
| Afu_gliC sybr rv | CCTTTGTTTTCGAGGCTCTG |
| Afu_gliN sybr fw | GTTCCACGTCCAGTCCATCT |
| Afu_gliN sybr rv | AGACTGCCTTCGGTGAATTG |
| Afu_gliI sybr fw | CCTTCCACCAGATTCCCTTT |
| Afu_gliI sybr rv | CGCTAGCACAATACCCCTGT |
| Afu_gliJ sybr fw | GTATCCGAGGAGGACGTCAA |
| Afu_gliJ sybr rv | CAACTTCCTCACCCGTTCTC |
| AfuPex5_pRS426_5UTR_fw (P1) | GTAACGCCAGGGTTTTCCCAGTCACGACGCATTACTGATAACCGAGGATTGAG |
| AfuPex5 5UTR rv (P2) | CAGTGCCTCCTCTCAGACAGAATGGTTGACGAATTCACTAGAAACCTG |
| AfuPex5_3UTR_fw (P3) | GAGCATTGTTTGAGGCGAATTCGGATGGTATCTCGTGCGCTTTC |
| AfuPex5_pRS426_3UTR_rv (P4) | GCGGATAACAATTTCACACAGGAAACAGCGCGTTTTTGACGGCGCCGGCGAC |
| AfuPex7_pRS426_5UTR_fw (P5) | GTAACGCCAGGGTTTTCCCAGTCACGACGCAACTGGAGTAGTCCGCATCC |
| AfuPex7 5UTR rv (P6) | CAGTGCCTCCTCTCAGACAGAATGGTGCAAAATACCGGGTATAGG |
| AfuPex7_3UTR_fw (P7) | GAGCATTGTTTGAGGCGAATTCCCAGTTCCACCTACCCTGTATTGG |
| AfuPex7_pRS426_3UTR_rv (P8) | GCGGATAACAATTTCACACAGGAAACAGCGGGAAGACGCAGAAGCCAAGAG |
| AniPex5_pRS426_5UTR_fw (P9) | GTAACGCCAGGGTTTTCCCAGTCACGACGCATTGGAAACCTCTTTTACGACG |
| AniPex5 5UTR rv (P10) | CAGTGCCTCCTCTCAGACAGAATGGTTGCGGGAAGAAGGTAAGTTC |
| AniPex5_3UTR_fw (P11) | GAGCATTGTTTGAGGCGAATTCGAAGGGTTAGGAGTCAGGCTGG |
| AniPex5_pRS426_3UTR_rv (P12) | GCGGATAACAATTTCACACAGGAAACAGCGTGTCTGGTCGACTAATTTCCG |
| AniPex7_pRS426_5UTR_fw (P13) | GTAACGCCAGGGTTTTCCCAGTCACGACGGTACGTATAGTCATTCGCGTG |
| AniPex7 5UTR rv (P14) | CAGTGCCTCCTCTCAGACAGAATGGTCGAAGAAGGTTGAGTCACAG |
| AniPex7_3UTR_fw (P15) | GAGCATTGTTTGAGGCGAATTCGGCGTTCAGTTTCCCTTCCCC |
| AniPex7_pRS426_3UTR_rv (P16) | GCGGATAACAATTTCACACAGGAAACAGCGGACCCAGTTGTAGGGGAAGGG |
| pyrG fw (P17) | GCATGCAAGCTTGGCGTATTCTGTCTGAGAGGAGGC |
| pyrG rv (P18) | GAATTCGCCTCAAACAATGCTCTTCACC |
| AfuMpkA_pRS426_5UTR_fw (P19) | GTAACGCCAGGGTTTTCCCAGTCACGACGTACTCATTCCTTGTTCTGAT |
| AfuMpkA ORF rv (P20) | AGGAACATCATAGGGATAACCACCGCTACCACCTCCCAGCGGGGGATGGATGTCCAA |
| AfuMpkA_3UTR_fw (P21) | ATCAGTGCCTCCTCTCAGACAGACGTTGACTTTCGTATGAAGC |
| AfuMpkA_pRS426_3UTR_rv (P22) | GCGGATAACAATTTCACACAGGAAACAGCGAAATCCGCTTCAACACCCCTTTC |
| OZG916 | GGAGGTGGTAGCGGTGGT |
| OZG694 | CTGTCTGAGAGGAGGCACTGAT |
| AfuGtmA_pRS426_5UTR_fw (P23) | GTAACGCCAGGGTTTTCCCAGTCACGACGGACTGTACGCACAGCGTACGATTT |
| AfuGtmA ORF rv (P24) | CAATTGCCCGTCTGTCAGATCTTTGGTGAAGTTGAAAAGCGAGTA |
| AfuGtmA_3UTR_fw (P25) | CGGCTCATCGTCACCCCATGATAGCACAAAATAAGCAGCTGTGGCTCG |
| AfuGtmA_pRS426_3UTR_rv (P26) | CGGATAACAATTTCACACAGGAAACAGCGTGACAGTCCCGACGTTGCGAGTC |
| AfuGliT_pRS426_5UTR_fw (P27) | GTAACGCCAGGGTTTTCCCAGTCACGACGGTCCACGAGTTGGGCGGGACC |
| AfuGliT ORF rv (P28) | ACCACCGCTACCACCTCCTAGCTCCTGATCGAGACGAAA |
| AfuGliT_3UTR_fw (P29) | CGGCTCATCGTCACCCCATGATAGAAGTTTGTTATAGCTGTACAT |
| AfuGliT_pRS426_3UTR_rv (P30) | GCGGATAACAATTTCACACAGGAAACAGCGAACTTCACCAGCCTGAGCCC |
| P31 | GGAGGTGGTAGCGGTGGT |
| P32 | CTGTCAGATCTGTAAAAAAGTTTCGGCCGGC |
| prtA FW (P33) | GATCTGACAGACGGGCAATTG |
| prtA RV (P34) | CTATCATGGGGTGACGATGAGCCG |
|  |  |
|  |  |
|  |  |
|  |  |
|  |  |
|  |  |
|  |  |
|  |  |
|  |  |
|  |  |
|  |  |
|  |  |
|  |  |
|  |  |
|  |  |
|  |  |
|  |  |
|  |  |
|  |  |
|  |  |
|  |  |
|  |  |
|  |  |
|  |  |
