# Supplementary material for: Vacuoles and peroxisomes are involved in Aspergillus fumigatus gliotoxin production and self-protection
Source: Research Square preprint supplement (doi:10.21203/rs.3.rs-2966047/v1), 2023-05-31
Supplement: Supplementary file 4 [file abbb2c65d91c9cdf9e9dec61.xlsx]

## Sheet: Legend
Supplementary Table S1 - List of proteins identified in the wild-type, GliT:GFP and GtmA:GFP upon immunoprecipitation during gliotoxin production conditions.

## Sheet: Wild-type 24 hs_1
Acession	Description	Score	Coverage	# Proteins	#Unique Peptides	#Peptides	#PSMs	#Aas	MW kDa	calc. pI
Afu1g02290	Afu1g02290 AspGDID:ASPL0000101399 COORDS:Chr1_A_fumigatus_Af293:670312-669933C, translated using codon table 1 (106 amino acids) Uncharacterized ORF; Protein of unknown function; calcium downregulated	7.16	0.2925	1	2	2	4	106	11.8	4.58
Afu1g02550	Afu1g02550 AspGDID:ASPL0000101425 COORDS:Chr1_A_fumigatus_Af293:746335-744583C, translated using codon table 1 (448 amino acids) Uncharacterized ORF; Tubulin alpha-1 subunit; gene pair with AFUA_2G14990 (tubulin alpha-2 subunit)	7.37	0.1563	1	3	5	5	448	50	5.1
Afu1g02980	Afu1g02980 AspGDID:ASPL0000101468 COORDS:Chr1_A_fumigatus_Af293:854826-855623W, translated using codon table 1 (265 amino acids) Uncharacterized ORF; Putative 6-phosphogluconolactonase; calcium downregulated	2.64	0.2189	1	4	4	4	265	28.8	6.28
Afu1g03390	Afu1g03390 AspGDID:ASPL0000101509 COORDS:Chr1_A_fumigatus_Af293:988367-987625C, translated using codon table 1 (165 amino acids) Uncharacterized ORF; Putative 60S ribosomal protein L12	3.04	0.3273	1	1	4	4	165	17.9	9.55
Afu1g03930	Afu1g03930 AspGDID:ASPL0000101563 COORDS:Chr1_A_fumigatus_Af293:1136061-1132174C, translated using codon table 1 (1295 amino acids) Uncharacterized ORF; Ortholog of <i>A. nidulans FGSC A4</i> : AN10498, <i>A. niger CBS 513.88</i> : An01g02790, <i>A. oryzae RIB40</i> : AO090003000957, <i>Neosartorya fischeri NRRL 181</i> : NFIA_020760 and <i>Aspergillus wentii</i> : Aspwe1_0066343	0	0.1807	1	1	16	17	1295	146.5	8.29
Afu1g04320	Afu1g04320 AspGDID:ASPL0000101600 COORDS:Chr1_A_fumigatus_Af293:1226288-1226942W, translated using codon table 1 (201 amino acids) Uncharacterized ORF; Ribosomal protein S8	5.53	0.1542	1	2	2	2	201	22.8	11.18
Afu1g04530	Afu1g04530 AspGDID:ASPL0000101621 COORDS:Chr1_A_fumigatus_Af293:1282636-1283216W, translated using codon table 1 (148 amino acids) Uncharacterized ORF; Ribosomal L18ae protein family	2.12	0.1149	1	2	2	2	148	17.4	10.7
Afu1g04540	Afu1g04540 AspGDID:ASPL0000101622 COORDS:Chr1_A_fumigatus_Af293:1284032-1285205W, translated using codon table 1 (323 amino acids) Uncharacterized ORF; NADH-cytochrome b5 reductase involved in oxidative phosphorylation; hypoxia induced protein; induced by exposure to artemisinin	0	0.3158	1	1	7	7	323	36.2	9.04
Afu1g04660	Afu1g04660 AspGDID:ASPL0000101635 COORDS:Chr1_A_fumigatus_Af293:1318902-1317870C, translated using codon table 1 (203 amino acids) Uncharacterized ORF; Ribosomal protein L15	0	0.1576	1	2	3	4	203	24.2	11.3
Afu1g04900	Afu1g04900 AspGDID:ASPL0000101659 COORDS:Chr1_A_fumigatus_Af293:1389643-1388632C, translated using codon table 1 (258 amino acids) Uncharacterized ORF; Proliferating cell nuclear antigen (PCNA); conidia-enriched protein	0	0.1163	1	1	2	2	258	28.3	4.72
Afu1g04940	Afu1g04940 AspGDID:ASPL0000101663 COORDS:Chr1_A_fumigatus_Af293:1408563-1409639W, translated using codon table 1 (189 amino acids) Uncharacterized ORF; Ortholog(s) have GTP binding, GTPase activity	1.72	0.1693	1	1	2	2	189	21.4	6.42
Afu1g04950	glcA AspGDID:ASPL0000101664 COORDS:Chr1_A_fumigatus_Af293:1412013-1410732C, translated using codon table 1 (323 amino acids) Uncharacterized ORF; Ortholog(s) have protein serine/threonine phosphatase activity	1.98	0.2663	1	3	6	7	323	37.1	5.78
Afu1g05080	Afu1g05080 AspGDID:ASPL0000101677 COORDS:Chr1_A_fumigatus_Af293:1454060-1455134W, translated using codon table 1 (313 amino acids) Uncharacterized ORF; Putative 60S ribosomal protein P0; reacts with rabbit immunosera exposed to A. fumigatus conidia	3.05	0.1022	1	1	4	4	313	33.5	5.21
Afu1g05320	Afu1g05320 AspGDID:ASPL0000101700 COORDS:Chr1_A_fumigatus_Af293:1534715-1533151C, translated using codon table 1 (478 amino acids) Uncharacterized ORF; Has domain(s) with predicted electron carrier activity, protein disulfide oxidoreductase activity and role in cell redox homeostasis, glycerol ether metabolic process	1.78	0.0523	1	1	2	2	478	51.3	5.91
Afu1g05340	Afu1g05340 AspGDID:ASPL0000101702 COORDS:Chr1_A_fumigatus_Af293:1537487-1538453W, translated using codon table 1 (221 amino acids) Uncharacterized ORF; 40S ribosomal protein S19	0	0.1493	1	1	3	3	221	24.8	9.54
Afu1g05390	Afu1g05390 AspGDID:ASPL0000101707 COORDS:Chr1_A_fumigatus_Af293:1549201-1548016C, translated using codon table 1 (308 amino acids) Uncharacterized ORF; Ortholog(s) have ATP:ADP antiporter activity	1.98	0.2695	1	2	6	6	308	33.3	9.96
Afu1g05610	Afu1g05610 AspGDID:ASPL0000101729 COORDS:Chr1_A_fumigatus_Af293:1612356-1610038C, translated using codon table 1 (616 amino acids) Verified ORF; Putative protein phosphotase 2a 65kd regulatory subunit; conidia-enriched protein; protein induced by heat shock	0	0.1185	1	1	5	5	616	69.1	4.86
Afu1g05630	Afu1g05630 AspGDID:ASPL0000101731 COORDS:Chr1_A_fumigatus_Af293:1617319-1616207C, translated using codon table 1 (266 amino acids) Uncharacterized ORF; 40S ribosomal protein S3	8.54	0.3233	1	4	6	6	266	29.2	9.1
Afu1g05990	Afu1g05990 AspGDID:ASPL0000101768 COORDS:Chr1_A_fumigatus_Af293:1728875-1727904C, translated using codon table 1 (202 amino acids) Uncharacterized ORF; Ribosomal protein L16a	2.97	0.2525	1	2	7	7	202	23.1	10.51
Afu1g06210	agm1 AspGDID:ASPL0000101789 COORDS:Chr1_A_fumigatus_Af293:1791710-1793700W, translated using codon table 1 (566 amino acids) Verified ORF; N-acetylphosphoglucosamine mutase, involved in chitin biosynthesis; essential	0	0.1166	1	1	5	5	566	61.5	6.11
Afu1g06340	Afu1g06340 AspGDID:ASPL0000101802 COORDS:Chr1_A_fumigatus_Af293:1821569-1822486W, translated using codon table 1 (186 amino acids) Uncharacterized ORF; Putative 60S ribosomal protein L27	0	0.2043	1	2	4	4	186	21.4	10.49
Afu1g06390	tef1 AspGDID:ASPL0000101807 COORDS:Chr1_A_fumigatus_Af293:1831593-1833461W, translated using codon table 1 (494 amino acids) Verified ORF; Putative translation elongation factor EF-1 alpha subunit; protein abundant in conidia; protein induced by heat shock	6.5	0.2105	1	5	9	11	494	53.8	9.1
Afu1g06820	Afu1g06820 AspGDID:ASPL0000101850 COORDS:Chr1_A_fumigatus_Af293:1947751-1945964C, translated using codon table 1 (438 amino acids) Verified ORF; Protein of unknown function identified by mass spectrometry; transcript up-regulated in conidia exposed to neutrophils	0	0.0776	1	1	2	2	438	50.2	5.47
Afu1g06960	Afu1g06960 AspGDID:ASPL0000101864 COORDS:Chr1_A_fumigatus_Af293:1985804-1987045W, translated using codon table 1 (370 amino acids) Uncharacterized ORF; Putative pyruvate dehydrogenase complex subunit alpha; protein induced by hydrogen peroxide; hypoxia induced protein	5.96	0.2297	1	4	7	7	370	41.5	6.8
Afu1g07380	Afu1g07380 AspGDID:ASPL0000101904 COORDS:Chr1_A_fumigatus_Af293:2090929-2084331C, translated using codon table 1 (2126 amino acids) Uncharacterized ORF; Putative NADH-dependent glutamate synthase; transcript induced during conidial germination; transcript up-regulated in conidia exposed to neutrophils; SrbA-regulated during hypoxia	19.21	0.1952	1	12	30	34	2126	234.1	6.39
Afu1g07440	hsp70 AspGDID:ASPL0000101909 COORDS:Chr1_A_fumigatus_Af293:2102587-2104621W, translated using codon table 1 (638 amino acids) Verified ORF; Molecular chaperone; conidia-enriched protein	36.29	0.4357	1	19	23	32	638	69.6	5.17
Afu1g07530	Afu1g07530 AspGDID:ASPL0000101918 COORDS:Chr1_A_fumigatus_Af293:2122230-2121254C, translated using codon table 1 (257 amino acids) Uncharacterized ORF; Ortholog(s) have adenylate kinase activity, role in ADP biosynthetic process, DNA replication initiation and cytosol, mitochondrial intermembrane space, mitochondrial outer membrane, nucleus localization	5.84	0.2763	1	2	4	5	257	28.7	7.88
Afu1g08840	Afu1g08840 AspGDID:ASPL0000101950 COORDS:Chr1_A_fumigatus_Af293:2290909-2291935W, translated using codon table 1 (228 amino acids) Uncharacterized ORF; Ortholog(s) have guanylate kinase activity, role in GMP metabolic process and cytoplasm, nucleus localization	0	0.1842	1	2	3	3	228	25.5	7.43
Afu1g08850	aspD AspGDID:ASPL0000101951 COORDS:Chr1_A_fumigatus_Af293:2293812-2292464C, translated using codon table 1 (346 amino acids) Verified ORF; Septin; localizes to long tubular structures within hyphae and to newly formed septa; repressed by exposure to artemisinin	0	0.1792	1	3	4	4	346	39.2	7.84
Afu1g09100	Afu1g09100 AspGDID:ASPL0000101976 COORDS:Chr1_A_fumigatus_Af293:2363153-2364329W, translated using codon table 1 (192 amino acids) Uncharacterized ORF; 60S ribosomal protein L9	8.57	0.3281	1	4	5	5	192	21.8	9.67
Afu1g09130	Afu1g09130 AspGDID:ASPL0000101979 COORDS:Chr1_A_fumigatus_Af293:2372730-2370383C, translated using codon table 1 (725 amino acids) Verified ORF; Protein of unknown function identified by mass spectrometry	4.47	0.1048	1	3	4	4	725	80.7	8.22
Afu1g09270	Afu1g09270 AspGDID:ASPL0000101993 COORDS:Chr1_A_fumigatus_Af293:2402850-2405522W, translated using codon table 1 (890 amino acids) Uncharacterized ORF; Ortholog(s) have role in cell morphogenesis, negative regulation of sexual sporulation resulting in formation of a cellular spore, phialide development, sexual sporulation resulting in formation of a cellular spore	0	0.0742	1	1	5	5	890	98.3	9.31
Afu1g09480	Afu1g09480 AspGDID:ASPL0000102014 COORDS:Chr1_A_fumigatus_Af293:2449876-2450674W, translated using codon table 1 (200 amino acids) Uncharacterized ORF; Ortholog(s) have protein transporter activity and role in ascospore formation, cellular response to cadmium ion, detoxification of cadmium ion, intracellular protein transport, retrograde transport, endosome to Golgi	0	0.33	1	1	4	4	200	22	5.24
Afu1g09670	Afu1g09670 AspGDID:ASPL0000102033 COORDS:Chr1_A_fumigatus_Af293:2504228-2502720C, translated using codon table 1 (502 amino acids) Uncharacterized ORF; Putative HLH transcription factor; calcium induced	0	0.1793	1	1	5	6	502	54.7	6.68
Afu1g09800	Afu1g09800 AspGDID:ASPL0000102046 COORDS:Chr1_A_fumigatus_Af293:2543871-2545480W, translated using codon table 1 (394 amino acids) Uncharacterized ORF; Ortholog of S. cerevisiae OLA1; snoRNA Afu-304 encoded within intron 2	0	0.1421	1	1	3	3	394	43.5	7.81
Afu1g09830	Afu1g09830 AspGDID:ASPL0000102049 COORDS:Chr1_A_fumigatus_Af293:2550807-2551983W, translated using codon table 1 (348 amino acids) Uncharacterized ORF; Ortholog(s) have protein complex scaffold activity, role in posttranslational protein targeting to membrane, response to heat and TRC complex, nucleus localization	3.41	0.1293	1	1	3	3	348	36.3	5.02
Afu1g10130	Afu1g10130 AspGDID:ASPL0000102077 COORDS:Chr1_A_fumigatus_Af293:2611841-2610281C, translated using codon table 1 (446 amino acids) Uncharacterized ORF; Putative adenosylhomocysteinase; protein induced by heat shock	16.55	0.3229	1	10	11	13	446	48.5	6.21
Afu1g10350	pgkA AspGDID:ASPL0000102099 COORDS:Chr1_A_fumigatus_Af293:2666254-2667669W, translated using codon table 1 (417 amino acids) Verified ORF; Putative phosphoglycerate kinase; reacts with rabbit immunosera exposed to conidia; hypoxia induced protein; transcript up-regulated in conidia exposed to neutrophils; induced by gliotoxin exposure	14.85	0.4988	1	10	14	14	417	44.7	6.74
Afu1g10630	Afu1g10630 AspGDID:ASPL0000102127 COORDS:Chr1_A_fumigatus_Af293:2776408-2774958C, translated using codon table 1 (387 amino acids) Uncharacterized ORF; Putative S-adenosylmethionine synthetase; higher expression in 48 h biofilm vs planktonic cells; hypoxia induced protein	4.14	0.2868	1	3	8	8	387	42.2	6.01
Afu1g10810	Afu1g10810 AspGDID:ASPL0000102144 COORDS:Chr1_A_fumigatus_Af293:2821017-2822416W, translated using codon table 1 (391 amino acids) Uncharacterized ORF; Ortholog(s) have role in calcium ion transport into cytosol and cytosol, plasma membrane localization	1.73	0.133	1	1	3	4	391	44.1	6.96
Afu1g10820	Afu1g10820 AspGDID:ASPL0000102145 COORDS:Chr1_A_fumigatus_Af293:2823301-2822605C, translated using codon table 1 (211 amino acids) Uncharacterized ORF; Ortholog(s) have adenylylsulfate kinase activity	2.3	0.1422	1	1	2	2	211	23.6	6.96
Afu1g10910	tubA AspGDID:ASPL0000102154 COORDS:Chr1_A_fumigatus_Af293:2850137-2848155C, translated using codon table 1 (466 amino acids) Uncharacterized ORF; Beta-tubulin; predicted gene pair with AFUA_7G00250 (tubulin beta-2 subunit); protein induced by hydrogen peroxide	0	0.1652	2	2	5	5	466	51.8	4.87
Afu1g11110	cch1 AspGDID:ASPL0000102174 COORDS:Chr1_A_fumigatus_Af293:2929992-2923401C, translated using codon table 1 (2125 amino acids) Uncharacterized ORF; Putative voltage-gated calcium channel	0	0.072	1	1	13	14	2125	240.2	8.38
Afu1g11130	Afu1g11130 AspGDID:ASPL0000102176 COORDS:Chr1_A_fumigatus_Af293:2932858-2933809W, translated using codon table 1 (200 amino acids) Uncharacterized ORF; 60S ribosomal protein L6	8.97	0.425	1	4	7	8	200	22.4	10.15
Afu1g11190	Afu1g11190 AspGDID:ASPL0000102182 COORDS:Chr1_A_fumigatus_Af293:2947142-2948249W, translated using codon table 1 (227 amino acids) Verified ORF; Putative eukaryotic translation elongation factor 1 subunit eEF1-beta; reacts with rabbit immunosera exposed to A. fumigatus conidia; induced by gliotoxin exposure	11.02	0.4802	1	5	6	6	227	25.2	4.55
Afu1g11420	Afu1g11420 AspGDID:ASPL0000102205 COORDS:Chr1_A_fumigatus_Af293:3010805-3006406C, translated using codon table 1 (1378 amino acids) Uncharacterized ORF; Ortholog(s) have mRNA 5'-UTR binding, translation repressor activity, nucleic acid binding activity	0	0.0871	1	1	7	8	1378	152.2	7.56
Afu1g11550	Afu1g11550 AspGDID:ASPL0000102219 COORDS:Chr1_A_fumigatus_Af293:3049138-3050658W, translated using codon table 1 (426 amino acids) Uncharacterized ORF; Has domain(s) with predicted kinase activity, transferase activity, transferring phosphorus-containing groups activity and role in glycerophospholipid biosynthetic process	3.53	0.1667	1	5	6	6	426	48.6	5.83
Afu1g11710	Afu1g11710 AspGDID:ASPL0000102235 COORDS:Chr1_A_fumigatus_Af293:3080890-3079981C, translated using codon table 1 (217 amino acids) Uncharacterized ORF; Ribosomal protein L1	4.8	0.2258	1	2	3	4	217	24.2	9.86
Afu1g12070	Afu1g12070 AspGDID:ASPL0000102273 COORDS:Chr1_A_fumigatus_Af293:3197608-3198304W, translated using codon table 1 (175 amino acids) Uncharacterized ORF; Ortholog(s) have glycine dehydrogenase (decarboxylating) activity, role in glycine catabolic process, one-carbon metabolic process, protein lipoylation and mitochondrion localization	0	0.2629	1	1	3	4	175	18.6	4.86
Afu1g12170	Afu1g12170 AspGDID:ASPL0000102283 COORDS:Chr1_A_fumigatus_Af293:3214725-3216299W, translated using codon table 1 (440 amino acids) Uncharacterized ORF; Putative translation elongation factor EF-Tu; hypoxia induced protein	1.96	0.1614	1	4	5	6	440	48.3	7.18
Afu1g12610	hsp88 AspGDID:ASPL0000102329 COORDS:Chr1_A_fumigatus_Af293:3331407-3333764W, translated using codon table 1 (714 amino acids) Uncharacterized ORF; Hsp70 chaperone; conidia-enriched protein; induction in response to hydrogen peroxide Yap1-dependent	9.62	0.3782	1	8	19	19	714	80	5.17
Afu1g12800	Afu1g12800 AspGDID:ASPL0000102348 COORDS:Chr1_A_fumigatus_Af293:3382593-3384187W, translated using codon table 1 (385 amino acids) Uncharacterized ORF; Putative NADPH isocitrate dehydrogenase; transcript induced during conidial germination	2.33	0.0468	1	2	2	2	385	41.7	8.51
Afu1g12840	niiA AspGDID:ASPL0000102352 COORDS:Chr1_A_fumigatus_Af293:3393418-3397198W, translated using codon table 1 (1102 amino acids) Uncharacterized ORF; Putative nitrite reductase; nitrogen-regulated gene, used as a conditional promoter; protein induced by heat shock; transcript downregulated in response to voriconazole	0	0.2151	1	3	18	19	1102	123.1	6.62
Afu1g12890	Afu1g12890 AspGDID:ASPL0000102357 COORDS:Chr1_A_fumigatus_Af293:3406505-3407674W, translated using codon table 1 (300 amino acids) Uncharacterized ORF; Putative 60S Ribosomal protein L5	4.69	0.34	1	6	7	9	300	34.8	8.94
Afu1g12920	glpV AspGDID:ASPL0000102360 COORDS:Chr1_A_fumigatus_Af293:3420644-3417594C, translated using codon table 1 (879 amino acids) Uncharacterized ORF; Putative glycogen phosphorylase; transcript up-regulated in conidia exposed to neutrophils	0	0.1069	1	2	6	7	879	100.2	6.04
Afu1g13090	Afu1g13090 AspGDID:ASPL0000102377 COORDS:Chr1_A_fumigatus_Af293:3472871-3470577C, translated using codon table 1 (764 amino acids) Uncharacterized ORF; Ortholog(s) have anthranilate synthase activity, glyceraldehyde-3-phosphate dehydrogenase (NAD+) (phosphorylating) activity, indole-3-glycerol-phosphate synthase activity, phosphoribosylanthranilate isomerase activity	0	0.1715	1	3	9	10	764	82.2	6.34
Afu1g13250	Afu1g13250 AspGDID:ASPL0000102393 COORDS:Chr1_A_fumigatus_Af293:3527669-3531106W, translated using codon table 1 (1145 amino acids) Uncharacterized ORF; Putative phospholipase C; calcium induced	0	0.1083	1	1	7	8	1145	127.3	8.95
Afu1g13490	Afu1g13490 AspGDID:ASPL0000102417 COORDS:Chr1_A_fumigatus_Af293:3586808-3588296W, translated using codon table 1 (293 amino acids) Uncharacterized ORF; Putative spermidine synthase; protein induced by hydrogen peroxide	9.32	0.1468	1	3	4	4	293	33.4	5.54
Afu1g13500	tktA AspGDID:ASPL0000102418 COORDS:Chr1_A_fumigatus_Af293:3591128-3588583C, translated using codon table 1 (684 amino acids) Verified ORF; Putative transketolase; protein abundant in conidia; protein induced by heat shock and by hydrogen peroxide; reacts with rabbit immunosera exposed to A. fumigatus conidia	21.24	0.3143	1	10	15	17	684	74.8	6.6
Afu1g13710	Afu1g13710 AspGDID:ASPL0000102439 COORDS:Chr1_A_fumigatus_Af293:3650512-3647224C, translated using codon table 1 (1064 amino acids) Uncharacterized ORF; Isoleucyl-tRNA synthetase, cytoplasmic	2	0.1071	1	1	9	9	1064	122.3	6.43
Afu1g14410	rpl17 AspGDID:ASPL0000102509 COORDS:Chr1_A_fumigatus_Af293:3851949-3852806W, translated using codon table 1 (208 amino acids) Uncharacterized ORF; 60S ribosomal protein L17	4.58	0.2692	1	3	5	5	208	23.4	10.98
Afu1g14550	sod3 AspGDID:ASPL0000102522 COORDS:Chr1_A_fumigatus_Af293:3887266-3888013W, translated using codon table 1 (210 amino acids) Verified ORF; Putative manganese superoxide dismutase; allergen Asp f 6; recognized by IgE from allergic patients; expressed only in hyphae; transcript up-regulated in hyphae exposed to neutrophils and to amphotericin B	11.25	0.4381	1	2	5	8	210	23.4	7.74
Afu1g14570	Afu1g14570 AspGDID:ASPL0000102524 COORDS:Chr1_A_fumigatus_Af293:3892553-3895217W, translated using codon table 1 (872 amino acids) Uncharacterized ORF; Putative phosphoribosyl-AMP cyclohydrolase; no human homolog	4	0.1147	1	3	7	7	872	92.8	5.66
Afu1g15020	Afu1g15020 AspGDID:ASPL0000102569 COORDS:Chr1_A_fumigatus_Af293:4039457-4040397W, translated using codon table 1 (215 amino acids) Uncharacterized ORF; 40S ribosomal protein S5; reacts with rabbit immunosera exposed to A. fumigatus conidia	9.5	0.2837	1	3	6	7	215	23.9	9.22
Afu1g15260	Afu1g15260 AspGDID:ASPL0000102592 COORDS:Chr1_A_fumigatus_Af293:4109152-4107552C, translated using codon table 1 (389 amino acids) Uncharacterized ORF; Ortholog of <i>A. nidulans FGSC A4</i> : AN0860, <i>A. niger CBS 513.88</i> : An01g13370, <i>A. oryzae RIB40</i> : AO090103000449, AO090005001207, <i>Aspergillus wentii</i> : Aspwe1_0111296 and <i>Aspergillus sydowii</i> : Aspsy1_0273264	2.34	0.2005	1	1	5	5	389	44	5.4
Afu1g15450	Afu1g15450 AspGDID:ASPL0000102610 COORDS:Chr1_A_fumigatus_Af293:4172637-4171167C, translated using codon table 1 (424 amino acids) Uncharacterized ORF; Ortholog(s) have adenylosuccinate synthase activity, sulfinylpropanyl adenylate synthase activity	2.18	0.158	1	2	5	6	424	46.6	6.9
Afu1g15730	Afu1g15730 AspGDID:ASPL0000102636 COORDS:Chr1_A_fumigatus_Af293:4254406-4255080W, translated using codon table 1 (130 amino acids) Uncharacterized ORF; 40S ribosomal protein S22	5.89	0.4231	1	2	3	4	130	14.7	9.66
Afu1g16840	Afu1g16840 AspGDID:ASPL0000102749 COORDS:Chr1_A_fumigatus_Af293:4595884-4595128C, translated using codon table 1 (179 amino acids) Uncharacterized ORF; TCTP family protein	4.6	0.257	1	2	4	4	179	20.2	4.97
Afu2g00450	Afu2g00450 AspGDID:ASPL0000102876 COORDS:Chr2_A_fumigatus_Af293:98153-96508C, translated using codon table 1 (530 amino acids) Uncharacterized ORF; Putative hexokinase	7.33	0.2679	1	6	11	12	530	58.3	5.9
Afu2g00720	Afu2g00720 AspGDID:ASPL0000102904 COORDS:Chr2_A_fumigatus_Af293:161113-162800W, translated using codon table 1 (492 amino acids) Uncharacterized ORF; Putative aldehyde dehydrogenase (NAD+)	4.43	0.2663	1	2	8	9	492	51.9	5.81
Afu2g01010	Afu2g01010 AspGDID:ASPL0000102932 COORDS:Chr2_A_fumigatus_Af293:234729-236432W, translated using codon table 1 (534 amino acids) Uncharacterized ORF; Putative myo-inositol-phosphate synthase; transcript up-regulated in conidia exposed to neutrophils	4.85	0.176	1	2	6	7	534	58.6	6.23
Afu2g01210	Afu2g01210 AspGDID:ASPL0000102952 COORDS:Chr2_A_fumigatus_Af293:284424-286208W, translated using codon table 1 (489 amino acids) Uncharacterized ORF; Putative ATP dependent RNA helicase; transcript induced by exposure to human airway epithelial cells	1.7	0.2556	1	2	8	10	489	53.9	5.71
Afu2g01240	invB AspGDID:ASPL0000102955 COORDS:Chr2_A_fumigatus_Af293:290755-292349W, translated using codon table 1 (514 amino acids) Uncharacterized ORF; Predicted invertase, involved in sugar metabolism	6.29	0.1012	1	3	5	5	514	57.2	5.74
Afu2g01720	Afu2g01720 AspGDID:ASPL0000103002 COORDS:Chr2_A_fumigatus_Af293:422590-424546W, translated using codon table 1 (635 amino acids) Uncharacterized ORF; Ortholog of <i>A. nidulans FGSC A4</i> : AN4654, <i>A. niger CBS 513.88</i> : An07g05260, <i>Aspergillus sydowii</i> : Aspsy1_0155851 and <i>Aspergillus carbonarius ITEM 5010</i> : Acar5010_208321	0	0.1402	1	1	6	6	635	68.5	9.17
Afu2g02050	cyp7 AspGDID:ASPL0000103035 COORDS:Chr2_A_fumigatus_Af293:509986-508618C, translated using codon table 1 (373 amino acids) Uncharacterized ORF; Putative peptidyl-prolyl cis-trans isomerase	0	0.0912	1	2	3	4	373	41.3	5.99
Afu2g02100	Afu2g02100 AspGDID:ASPL0000103040 COORDS:Chr2_A_fumigatus_Af293:523316-521496C, translated using codon table 1 (513 amino acids) Uncharacterized ORF; Putative dihydrolipoamide dehydrogenase; reacts with rabbit immunosera exposed to A. fumigatus conidia	4.16	0.2242	1	2	9	9	513	54.9	8.18
Afu2g02165	Afu2g02165 AspGDID:ASPL0000362138 COORDS:Chr2_A_fumigatus_Af293:541339-540166C, translated using codon table 1 (347 amino acids) Uncharacterized ORF; Ortholog(s) have cytosol, nuclear periphery, nuclear pore, spindle pole body localization	1.93	0.1326	1	1	3	3	347	39.5	7.21
Afu2g02530	Afu2g02530 AspGDID:ASPL0000103083 COORDS:Chr2_A_fumigatus_Af293:653117-654358W, translated using codon table 1 (371 amino acids) Uncharacterized ORF; Ortholog(s) have role in activation of bipolar cell growth, homologous chromosome segregation, protein phosphorylation, regulation of DNA repair and regulation of circadian rhythm, <a href="#GOsection">more</a>	0	0.1159	1	1	3	4	371	42.4	9.45
Afu2g02540	rsmA AspGDID:ASPL0000103084 COORDS:Chr2_A_fumigatus_Af293:656345-657417W, translated using codon table 1 (302 amino acids) Verified ORF; Basic leucine zipper (bZIP) type transcription factor; involved in regulation of secondary metabolite production such as gliotoxin; neutrophils show decreased migration to overexpression mutant supernatants	0	0.0927	1	1	2	2	302	33.3	5.77
Afu2g02950	Afu2g02950 AspGDID:ASPL0000103124 COORDS:Chr2_A_fumigatus_Af293:754983-753816C, translated using codon table 1 (295 amino acids) Uncharacterized ORF; Has domain(s) with predicted oxidoreductase activity and role in oxidation-reduction process	1.89	0.5153	1	3	8	9	295	32.9	6.86
Afu2g03290	artA AspGDID:ASPL0000103158 COORDS:Chr2_A_fumigatus_Af293:868250-867203C, translated using codon table 1 (261 amino acids) Verified ORF; 14-3-3 family protein; predicted gene pair with AFUA_6G06750; conidia-enriched protein; protein induced by hydrogen peroxide; reacts with rabbit immunosera exposed to A. fumigatus conidia; hypoxia repressed protein	16.63	0.3908	1	7	8	9	261	29.1	4.84
Afu2g03490	Afu2g03490 AspGDID:ASPL0000103178 COORDS:Chr2_A_fumigatus_Af293:921519-923827W, translated using codon table 1 (645 amino acids) Uncharacterized ORF; Putative calcium/calmodulin-dependent protein kinase; calcium induced; transcript induced by exposure to human airway epithelial cells	0	0.2698	1	1	9	11	645	72.1	6.87
Afu2g03720	cyp4 AspGDID:ASPL0000103198 COORDS:Chr2_A_fumigatus_Af293:995026-995900W, translated using codon table 1 (205 amino acids) Uncharacterized ORF; Putative cyclophilin; peptidyl-prolyl cis-trans isomerase; allergen Asp f 11; transcript induced by growth on hydrogen peroxide	7.26	0.2439	1	4	6	7	205	22.3	8.57
Afu2g03830	aspf4 AspGDID:ASPL0000103209 COORDS:Chr2_A_fumigatus_Af293:1016683-1017651W, translated using codon table 1 (322 amino acids) Verified ORF; Allergen Asp f 4; higher expression in biofilm vs planktonic cells; transcript induced by growth on hydrogen peroxide	0	0.3012	1	3	5	5	322	34.1	5.35
Afu2g04130	Afu2g04130 AspGDID:ASPL0000103239 COORDS:Chr2_A_fumigatus_Af293:1132624-1131702C, translated using codon table 1 (160 amino acids) Uncharacterized ORF; 40S ribosomal protein S11	0	0.225	1	1	3	4	160	18.6	10.83
Afu2g04310	Afu2g04310 AspGDID:ASPL0000103257 COORDS:Chr2_A_fumigatus_Af293:1189815-1188083C, translated using codon table 1 (416 amino acids) Uncharacterized ORF; Argininosuccinate synthase; hypoxia induced protein	3.09	0.1418	1	1	4	5	416	46.1	5.48
Afu2g04620	bipA AspGDID:ASPL0000103288 COORDS:Chr2_A_fumigatus_Af293:1260682-1258486C, translated using codon table 1 (672 amino acids) Uncharacterized ORF; Hsp70 chaperone; protein enriched in dormant conidia	0	0.1295	1	3	6	6	672	73.3	5.03
Afu2g04930	Afu2g04930 AspGDID:ASPL0000103318 COORDS:Chr2_A_fumigatus_Af293:1356339-1357111W, translated using codon table 1 (225 amino acids) Verified ORF; Protein of unknown function identified by mass spectrometry	2.01	0.0844	1	2	2	2	225	25.2	6.34
Afu2g05910	hxkA AspGDID:ASPL0000103414 COORDS:Chr2_A_fumigatus_Af293:1662852-1664600W, translated using codon table 1 (490 amino acids) Verified ORF; Putative hexokinase; protein induced by heat shock	4.51	0.2367	1	3	8	9	490	54.2	5.17
Afu2g06150	pdiA AspGDID:ASPL0000103438 COORDS:Chr2_A_fumigatus_Af293:1746610-1744786C, translated using codon table 1 (517 amino acids) Verified ORF; Putative protein disulfide isomerase; conidial surface associated	3.73	0.1451	1	3	6	8	517	56.2	4.7
Afu2g07350	Afu2g07350 AspGDID:ASPL0000103458 COORDS:Chr2_A_fumigatus_Af293:1876933-1878405W, translated using codon table 1 (456 amino acids) Uncharacterized ORF; Ortholog(s) have glutamate-5-semialdehyde dehydrogenase activity, role in proline biosynthetic process and cytosol, nucleus localization	1.79	0.068	1	1	2	2	456	48.8	5.95
Afu2g07380	Afu2g07380 AspGDID:ASPL0000103461 COORDS:Chr2_A_fumigatus_Af293:1879464-1878670C, translated using codon table 1 (184 amino acids) Uncharacterized ORF; Ribosomal protein L18	6.78	0.3207	1	3	5	5	184	20.8	11.81
Afu2g07420	sac6 AspGDID:ASPL0000103465 COORDS:Chr2_A_fumigatus_Af293:1889973-1887748C, translated using codon table 1 (646 amino acids) Verified ORF; Putative actin-bundling protein, fimbrin; conidia-enriched protein	0	0.1517	1	1	5	5	646	72.4	6.13
Afu2g07500	pepP AspGDID:ASPL0000103473 COORDS:Chr2_A_fumigatus_Af293:1922270-1923825W, translated using codon table 1 (468 amino acids) Uncharacterized ORF; Putative prolidase; transcript induced by exposure to human airway epithelial cells; induced by growth on BSA as a sole nitrogen source	1.93	0.1432	1	2	5	6	468	51.9	5.73
Afu2g07810	Afu2g07810 AspGDID:ASPL0000103501 COORDS:Chr2_A_fumigatus_Af293:1998025-1999850W, translated using codon table 1 (537 amino acids) Uncharacterized ORF; Putative cytosolic hydroxymethyltransferase	0	0.1453	1	1	4	4	537	58.8	8.85
Afu2g07970	Afu2g07970 AspGDID:ASPL0000103517 COORDS:Chr2_A_fumigatus_Af293:2047985-2048981W, translated using codon table 1 (191 amino acids) Uncharacterized ORF; 60S ribosomal protein L19	0	0.1885	1	1	5	6	191	22.6	11.56
Afu2g09200	Afu2g09200 AspGDID:ASPL0000103638 COORDS:Chr2_A_fumigatus_Af293:2358357-2358900W, translated using codon table 1 (106 amino acids) Uncharacterized ORF; 60S ribosomal protein L30	0	0.283	1	1	2	3	106	11.3	9.83
Afu2g09210	Afu2g09210 AspGDID:ASPL0000103639 COORDS:Chr2_A_fumigatus_Af293:2359448-2360452W, translated using codon table 1 (223 amino acids) Uncharacterized ORF; 60S ribosomal protein L10; reacts with rabbit immunosera exposed to A. fumigatus conidia	3.51	0.2152	1	4	6	7	223	25.6	10.32
Afu2g09290	hsp60 AspGDID:ASPL0000103647 COORDS:Chr2_A_fumigatus_Af293:2378663-2376729C, translated using codon table 1 (587 amino acids) Verified ORF; Putative antigenic mitochondrial protein; reacts with rabbit immunosera exposed to A. fumigatus conidia; hypoxia induced protein	9.01	0.3782	1	12	15	16	587	61.9	5.64
Afu2g09650	Afu2g09650 AspGDID:ASPL0000103682 COORDS:Chr2_A_fumigatus_Af293:2480020-2481781W, translated using codon table 1 (469 amino acids) Uncharacterized ORF; Aspartate transaminase; induced by L-tyrosine; transcript up-regulated in conidia exposed to neutrophils	0	0.0981	1	1	4	4	469	51.2	8.48
Afu2g09790	Afu2g09790 AspGDID:ASPL0000103695 COORDS:Chr2_A_fumigatus_Af293:2503042-2501287C, translated using codon table 1 (553 amino acids) Uncharacterized ORF; Putative glucose-6-phosphate isomerase	6.24	0.1754	1	4	6	7	553	61.3	6.35
Afu2g09850	Afu2g09850 AspGDID:ASPL0000103701 COORDS:Chr2_A_fumigatus_Af293:2516744-2518045W, translated using codon table 1 (355 amino acids) Uncharacterized ORF; Putative oxidoreductase, 2-nitropropane dioxygenase family; transcript up-regulated in conidia exposed to neutrophils	3.21	0.2958	1	1	4	4	355	37.7	7.02
Afu2g09910	faa4 AspGDID:ASPL0000103707 COORDS:Chr2_A_fumigatus_Af293:2540651-2538322C, translated using codon table 1 (697 amino acids) Uncharacterized ORF; Putative long chain fatty acid CoA ligase; fatty acid activator; hypoxia repressed protein	4.85	0.1263	1	2	6	6	697	76.7	7.31
Afu2g09960	ssc70 AspGDID:ASPL0000103712 COORDS:Chr2_A_fumigatus_Af293:2553995-2551772C, translated using codon table 1 (661 amino acids) Verified ORF; Putative mitochondrial Hsp70 chaperone; reacts with rabbit immunosera exposed to A. fumigatus conidia; hypoxia induced protein	2.08	0.1921	1	3	8	9	661	71.9	6.16
Afu2g10030	Afu2g10030 AspGDID:ASPL0000103718 COORDS:Chr2_A_fumigatus_Af293:2570628-2569665C, translated using codon table 1 (265 amino acids) Uncharacterized ORF; Immunoreactive protein; calcium induced; transcript induced by exposure to human airway epithelial cells; induced by gliotoxin exposure	0	0.0717	1	1	2	2	265	28.2	6.37
Afu2g10090	Afu2g10090 AspGDID:ASPL0000103724 COORDS:Chr2_A_fumigatus_Af293:2584422-2583412C, translated using codon table 1 (153 amino acids) Uncharacterized ORF; 40S ribosomal protein S15	8.57	0.2484	1	1	3	4	153	17.7	10.07
Afu2g10100	aspf8 AspGDID:ASPL0000103725 COORDS:Chr2_A_fumigatus_Af293:2585506-2585100C, translated using codon table 1 (111 amino acids) Uncharacterized ORF; Allergen Asp f 8; putative ribosomal protein P2; transcript induced by growth on hydrogen peroxide and menadione	2.62	0.6216	1	2	4	4	111	11.1	4.34
Afu2g10300	Afu2g10300 AspGDID:ASPL0000103745 COORDS:Chr2_A_fumigatus_Af293:2636570-2637526W, translated using codon table 1 (198 amino acids) Uncharacterized ORF; 40S ribosomal protein S17	0	0.1919	1	2	3	5	198	22.7	9.99
Afu2g10380	Afu2g10380 AspGDID:ASPL0000103753 COORDS:Chr2_A_fumigatus_Af293:2657604-2656030C, translated using codon table 1 (476 amino acids) Uncharacterized ORF; Has domain(s) with predicted translation initiation factor activity and eukaryotic translation initiation factor 3 complex localization	1.66	0.042	1	1	2	2	476	54.7	5.34
Afu2g10460	Afu2g10460 AspGDID:ASPL0000103761 COORDS:Chr2_A_fumigatus_Af293:2675914-2680045W, translated using codon table 1 (1317 amino acids) Uncharacterized ORF; Ortholog(s) have role in ascospore formation, mitotic G1 cell cycle arrest in response to nitrogen starvation, regulation of conjugation with cellular fusion and TORC2 complex, cell division site, cytosol, nucleus localization	0	0.12	1	1	8	8	1317	147.4	7.06
Afu2g10500	Afu2g10500 AspGDID:ASPL0000103765 COORDS:Chr2_A_fumigatus_Af293:2687569-2686778C, translated using codon table 1 (143 amino acids) Uncharacterized ORF; 40S ribosomal protein Rps16	3.75	0.4196	1	3	5	5	143	16	10.18
Afu2g10610	Afu2g10610 AspGDID:ASPL0000103776 COORDS:Chr2_A_fumigatus_Af293:2715240-2718149W, translated using codon table 1 (855 amino acids) Uncharacterized ORF; Ortholog(s) have ubiquitin binding activity	2.11	0.2152	1	1	9	12	855	94.9	5.08
Afu2g10660	mpdA AspGDID:ASPL0000103781 COORDS:Chr2_A_fumigatus_Af293:2727506-2726340C, translated using codon table 1 (388 amino acids) Verified ORF; Putative mannitol-1-phosphate dehydrogenase; conidia-enriched protein; protein induced by heat shock; reacts with rabbit immunosera exposed to conidia; no human homolog	0	0.3711	1	4	7	9	388	43	5.9
Afu2g11150	Afu2g11150 AspGDID:ASPL0000103830 COORDS:Chr2_A_fumigatus_Af293:2856083-2857872W, translated using codon table 1 (468 amino acids) Uncharacterized ORF; Putative secretory-pathway GDP dissociation inhibitor; transcript and protein levels increase upon exposure to amphotericin B	4.66	0.3205	1	5	9	9	468	52.2	5.5
Afu2g11260	luA AspGDID:ASPL0000103841 COORDS:Chr2_A_fumigatus_Af293:2894027-2896466W, translated using codon table 1 (777 amino acids) Uncharacterized ORF; Putative 3-isopropylmalate dehydratase with a predicted role in nitrogen metabolism; protein induced by heat shock; SrbA-regulated during hypoxia	6.09	0.1557	1	4	9	12	777	84	5.94
Afu2g11340	Afu2g11340 AspGDID:ASPL0000103849 COORDS:Chr2_A_fumigatus_Af293:2922123-2921251C, translated using codon table 1 (248 amino acids) Uncharacterized ORF; Ortholog(s) have role in intracellular sterol transport and fungal-type vacuole lumen localization	1.8	0.0847	1	2	3	3	248	27.3	5.94
Afu2g11850	rpL3 AspGDID:ASPL0000103899 COORDS:Chr2_A_fumigatus_Af293:3060721-3062260W, translated using codon table 1 (392 amino acids) Uncharacterized ORF; Allergenic ribosomal L3 protein; allergen Asp f 23; transcript induced in response to dibutyryl cyclic AMP	1.86	0.176	1	3	6	6	392	44.4	10.18
Afu2g11940	ade13 AspGDID:ASPL0000103908 COORDS:Chr2_A_fumigatus_Af293:3080820-3078848C, translated using codon table 1 (483 amino acids) Uncharacterized ORF; Adenylosuccinate lyase; reacts with rabbit immunosera exposed to A. fumigatus conidia	0	0.1863	1	1	6	6	483	54.7	6.55
Afu2g12450	Afu2g12450 AspGDID:ASPL0000103959 COORDS:Chr2_A_fumigatus_Af293:3199555-3200700W, translated using codon table 1 (354 amino acids) Uncharacterized ORF; Putative hydroxymethylglutaryl-CoA lyase; transcript up-regulated in conidia exposed to neutrophils	4.08	0.1554	1	3	4	4	354	37.8	6.8
Afu2g12880	Afu2g12880 AspGDID:ASPL0000104001 COORDS:Chr2_A_fumigatus_Af293:3304786-3302238C, translated using codon table 1 (803 amino acids) Uncharacterized ORF; Ortholog(s) have nucleus localization	0	0.137	1	1	6	6	803	90.2	6.47
Afu2g13250	trpB AspGDID:ASPL0000104039 COORDS:Chr2_A_fumigatus_Af293:3407647-3405303C, translated using codon table 1 (735 amino acids) Uncharacterized ORF; Putative bifunctional tryptophan synthase	0	0.102	1	3	5	7	735	78.7	5.96
Afu2g13470	Afu2g13470 AspGDID:ASPL0000104062 COORDS:Chr2_A_fumigatus_Af293:3491401-3490415C, translated using codon table 1 (284 amino acids) Uncharacterized ORF; Ortholog(s) have nucleotidase activity and role in pyrimidine nucleobase metabolic process	0	0.1761	1	1	3	3	284	32.3	5.63
Afu2g13530	Afu2g13530 AspGDID:ASPL0000104068 COORDS:Chr2_A_fumigatus_Af293:3518148-3521066W, translated using codon table 1 (839 amino acids) Verified ORF; Putative translation elongation factor EF-2 subunit; protein abundant in conidia; protein induced by heat shock	31.56	0.4374	2	17	28	29	839	93.1	6.96
Afu2g13680	Afu2g13680 AspGDID:ASPL0000104083 COORDS:Chr2_A_fumigatus_Af293:3556768-3558269W, translated using codon table 1 (434 amino acids) Uncharacterized ORF; Putative calcium/calmodulin-dependent protein kinase; transcript induced by exposure to human airway epithelial cells	0	0.0899	1	1	3	3	434	48.7	6.49
Afu2g13710	Afu2g13710 AspGDID:ASPL0000104086 COORDS:Chr2_A_fumigatus_Af293:3562035-3560485C, translated using codon table 1 (470 amino acids) Uncharacterized ORF; NADH-ubiquinone oxidoreductase 49 kDa subunit	1.63	0.2723	1	1	7	9	470	52.8	6.65
Afu2g13860	Afu2g13860 AspGDID:ASPL0000104101 COORDS:Chr2_A_fumigatus_Af293:3619597-3620049W, translated using codon table 1 (142 amino acids) Uncharacterized ORF; Histone H4	0	0.1408	2	1	2	3	142	15.8	10.21
Afu2g14210	ilv3 AspGDID:ASPL0000104136 COORDS:Chr2_A_fumigatus_Af293:3721264-3723226W, translated using codon table 1 (606 amino acids) Verified ORF; Putative mitochondrial dihydroxy acid dehydratase; hypoxia induced protein; induced by exposure to human airway epithelial cells; required for virulence	2.49	0.2294	1	2	7	8	606	64.7	7.65
Afu2g14270	Afu2g14270 AspGDID:ASPL0000104142 COORDS:Chr2_A_fumigatus_Af293:3742174-3739906C, translated using codon table 1 (603 amino acids) Uncharacterized ORF; Putative actin-binding protein; hypoxia repressed protein	0	0.1642	1	1	5	5	603	65.9	5.62
Afu2g14960	Afu2g14960 AspGDID:ASPL0000104211 COORDS:Chr2_A_fumigatus_Af293:3942076-3942959W, translated using codon table 1 (271 amino acids) Uncharacterized ORF; Ortholog(s) have RNA polymerase II activating transcription factor binding, disulfide oxidoreductase activity	2.82	0.1587	2	2	3	3	271	28.8	4.91
Afu2g15180	Afu2g15180 AspGDID:ASPL0000104235 COORDS:Chr2_A_fumigatus_Af293:4023587-4024676W, translated using codon table 1 (335 amino acids) Uncharacterized ORF; Ortholog of <i>A. nidulans FGSC A4</i> : AN7587, <i>A. niger CBS 513.88</i> : An09g03440, <i>A. oryzae RIB40</i> : AO090012000301, <i>Aspergillus wentii</i> : Aspwe1_0054076 and <i>Aspergillus sydowii</i> : Aspsy1_0058595	0	0.2209	1	1	5	5	335	35.9	5.22
Afu2g15760	Afu2g15760 AspGDID:ASPL0000104293 COORDS:Chr2_A_fumigatus_Af293:4162600-4165937W, translated using codon table 1 (1033 amino acids) Uncharacterized ORF; Ortholog(s) have ubiquitin activating enzyme activity, role in mRNA export from nucleus, protein ubiquitination and cytosol, nucleus localization	1.66	0.2304	1	4	16	18	1033	115.1	5.25
Afu2g16090	Afu2g16090 AspGDID:ASPL0000104326 COORDS:Chr2_A_fumigatus_Af293:4262510-4260510C, translated using codon table 1 (552 amino acids) Uncharacterized ORF; Karyopherin alpha subunit	6.75	0.2156	1	3	10	14	552	60.6	5.07
Afu2g16920	Afu2g16920 AspGDID:ASPL0000104411 COORDS:Chr2_A_fumigatus_Af293:4524971-4523657C, translated using codon table 1 (345 amino acids) Uncharacterized ORF; Ortholog(s) have actin filament binding, actin monomer binding activity and role in actin cortical patch organization, actin filament depolymerization, actin filament severing, sequestering of actin monomers	0	0.1681	1	1	4	4	345	37.7	5.41
Afu2g17000	Afu2g17000 AspGDID:ASPL0000104419 COORDS:Chr2_A_fumigatus_Af293:4544466-4551049W, translated using codon table 1 (2173 amino acids) Uncharacterized ORF; Ortholog of <i>A. nidulans FGSC A4</i> : AN5649, AN1674, AN0384, AN1268, AN7262, <i>A. fumigatus Af293</i> : Afu1g01700, Afu4g08730, Afu4g13630, Afu1g10012 and <i>A. niger CBS 513.88</i> : An01g09380, An01g06520, An04g09080, An04g03600	0	0.0966	1	1	10	10	2173	224.3	3.99
Afu2g17110	cdc48 AspGDID:ASPL0000104427 COORDS:Chr2_A_fumigatus_Af293:4568058-4570820W, translated using codon table 1 (819 amino acids) Uncharacterized ORF; Putative cell division control protein; protein induced by heat shock	1.92	0.2027	1	4	10	12	819	90.2	5.22
Afu2g17180	Afu2g17180 AspGDID:ASPL0000104434 COORDS:Chr2_A_fumigatus_Af293:4594212-4591692C, translated using codon table 1 (729 amino acids) Uncharacterized ORF; Ortholog(s) have Golgi apparatus, fungal-type vacuole membrane localization	0	0.0947	1	1	4	4	729	80.6	5.91
Afu3g00270	bgt2 AspGDID:ASPL0000104548 COORDS:Chr3_A_fumigatus_Af293:57708-56302C, translated using codon table 1 (446 amino acids) Verified ORF; Cell wall glucanase; predicted glycophosphatidylinositol (GPI)-anchor; secreted protein	2.76	0.0785	1	3	3	3	446	44.6	5.07
Afu3g04170	Afu3g04170 AspGDID:ASPL0000104933 COORDS:Chr3_A_fumigatus_Af293:1175521-1176878W, translated using codon table 1 (377 amino acids) Uncharacterized ORF; Ortholog(s) have pyruvate dehydrogenase (acetyl-transferring) activity and role in acetyl-CoA biosynthetic process from pyruvate, arginine biosynthetic process, glutamine biosynthetic process	4.75	0.1883	1	2	5	6	377	40.5	7.24
Afu3g04210	Afu3g04210 AspGDID:ASPL0000104937 COORDS:Chr3_A_fumigatus_Af293:1188450-1182737C, translated using codon table 1 (1857 amino acids) Uncharacterized ORF; Fatty acid synthase alpha subunit; transcript induced by exposure to human airway epithelial cells; no human homolog	1.61	0.0932	1	1	13	16	1857	204.5	6.48
Afu3g04220	Afu3g04220 AspGDID:ASPL0000104938 COORDS:Chr3_A_fumigatus_Af293:1190959-1197288W, translated using codon table 1 (2092 amino acids) Uncharacterized ORF; Putative fatty acid synthase beta subunit; calcium downregulated; repressed by exposure to artemisinin; no human homolog	4.88	0.1415	1	6	17	17	2092	231.9	6.28
Afu3g04250	Afu3g04250 AspGDID:ASPL0000104941 COORDS:Chr3_A_fumigatus_Af293:1208055-1206988C, translated using codon table 1 (294 amino acids) Uncharacterized ORF; Ortholog(s) have inositol monophosphate 1-phosphatase activity and role in inositol phosphate dephosphorylation	0	0.085	1	1	2	2	294	31.9	5.16
Afu3g05350	htb1 AspGDID:ASPL0000104951 COORDS:Chr3_A_fumigatus_Af293:1290859-1290284C, translated using codon table 1 (140 amino acids) Uncharacterized ORF; Histone H2B	2.09	0.1714	1	2	2	3	140	14.9	10.13
Afu3g05360	Afu3g05360 AspGDID:ASPL0000104952 COORDS:Chr3_A_fumigatus_Af293:1291520-1292443W, translated using codon table 1 (265 amino acids) Uncharacterized ORF; Has domain(s) with predicted DNA binding, protein heterodimerization activity, role in nucleosome assembly and nucleosome, nucleus localization	1.97	0.117	2	1	3	3	265	29.8	10.15
Afu3g05370	Afu3g05370 AspGDID:ASPL0000104953 COORDS:Chr3_A_fumigatus_Af293:1293607-1295556W, translated using codon table 1 (461 amino acids) Uncharacterized ORF; Putative dihydrolipoamide succinyltransferase; reacts with rabbit immunosera exposed to A. fumigatus conidia; hypoxia induced protein; transcript induced by exposure to human airway epithelial cells	8.11	0.2733	1	3	6	8	461	50.3	8.88
Afu3g05430	Afu3g05430 AspGDID:ASPL0000104959 COORDS:Chr3_A_fumigatus_Af293:1307445-1305739C, translated using codon table 1 (507 amino acids) Uncharacterized ORF; Ortholog(s) have translation regulator activity, nucleic acid binding activity	4.59	0.0986	1	2	5	5	507	57.1	8.82
Afu3g05450	Afu3g05450 AspGDID:ASPL0000104961 COORDS:Chr3_A_fumigatus_Af293:1314948-1313258C, translated using codon table 1 (478 amino acids) Uncharacterized ORF; Putative glutamate carboxypeptidase	0	0.1067	1	1	5	6	478	53	5.72
Afu3g05600	Afu3g05600 AspGDID:ASPL0000104976 COORDS:Chr3_A_fumigatus_Af293:1361310-1362104W, translated using codon table 1 (149 amino acids) Uncharacterized ORF; 60S ribosomal protein L27a	4.6	0.1812	1	3	4	4	149	16.8	10.43
Afu3g05950	Afu3g05950 AspGDID:ASPL0000105006 COORDS:Chr3_A_fumigatus_Af293:1459969-1453727C, translated using codon table 1 (2080 amino acids) Uncharacterized ORF; Ortholog(s) have role in anaphase-promoting complex-dependent proteasomal ubiquitin-dependent protein catabolic process, mitotic nuclear division, negative regulation of mitosis, response to UV	0	0.1173	1	1	15	15	2080	229.4	7.55
Afu3g06030	Afu3g06030 AspGDID:ASPL0000105014 COORDS:Chr3_A_fumigatus_Af293:1483778-1482859C, translated using codon table 1 (147 amino acids) Uncharacterized ORF; Ortholog(s) have ubiquitin binding, ubiquitin-protein transferase activity	6.39	0.2449	1	2	3	3	147	16.5	6.92
Afu3g06530	sC AspGDID:ASPL0000105064 COORDS:Chr3_A_fumigatus_Af293:1618981-1616721C, translated using codon table 1 (574 amino acids) Uncharacterized ORF; Putative ATP sulfurylase; sulfate adenylyltransferase; reacts with rabbit immunosera exposed to A. fumigatus conidia; hypoxia repressed protein	5.99	0.3171	1	5	14	14	574	64.3	7.06
Afu3g06610	Afu3g06610 AspGDID:ASPL0000105072 COORDS:Chr3_A_fumigatus_Af293:1639448-1641145W, translated using codon table 1 (508 amino acids) Uncharacterized ORF; Proteasome regulatory particle subunit; transcript induced by exposure to human airway epithelial cells	1.72	0.2165	1	2	7	7	508	58.4	7.18
Afu3g06840	Afu3g06840 AspGDID:ASPL0000105095 COORDS:Chr3_A_fumigatus_Af293:1702997-1704159W, translated using codon table 1 (261 amino acids) Uncharacterized ORF; Putative cytosolic small ribosomal subunit S4	9.42	0.4253	1	7	10	11	261	29.5	10.07
Afu3g06960	Afu3g06960 AspGDID:ASPL0000105107 COORDS:Chr3_A_fumigatus_Af293:1742922-1742198C, translated using codon table 1 (158 amino acids) Uncharacterized ORF; 60S ribosomal protein L21	4.21	0.2911	1	2	4	4	158	18	10.23
Afu3g06970	Afu3g06970 AspGDID:ASPL0000105108 COORDS:Chr3_A_fumigatus_Af293:1743190-1744103W, translated using codon table 1 (193 amino acids) Uncharacterized ORF; 40S ribosomal protein S9; transcript induced by exposure to human airway epithelial cells	6.8	0.2694	1	4	5	5	193	22.2	10.05
Afu3g07430	aspf27 AspGDID:ASPL0000105151 COORDS:Chr3_A_fumigatus_Af293:1867882-1867179C, translated using codon table 1 (163 amino acids) Verified ORF; Putative peptidyl-prolyl cis-trans isomerase; cyclophilin; allergen Asp f 27; protein abundant in conidia; Yap1-dependent induction in response to hydrogen peroxide; induced by L-tyrosine	2.68	0.3067	1	2	5	6	163	17.7	7.97
Afu3g07640	pma1 AspGDID:ASPL0000105170 COORDS:Chr3_A_fumigatus_Af293:1930419-1933527W, translated using codon table 1 (988 amino acids) Verified ORF; Putative plasma membrane H+ ATPase; transcript upregulated during conidial germination and in response to amphotericin B; protein and transcript levels downregulated by caspofungin treatment	2.95	0.1144	2	2	9	11	988	108.9	5.36
Afu3g07680	Afu3g07680 AspGDID:ASPL0000105174 COORDS:Chr3_A_fumigatus_Af293:1941416-1940148C, translated using codon table 1 (422 amino acids) Uncharacterized ORF; Putative ran GTPase activating protein	0	0.0545	1	1	2	2	422	46.2	4.68
Afu3g07810	sdh1 AspGDID:ASPL0000105185 COORDS:Chr3_A_fumigatus_Af293:1970306-1968056C, translated using codon table 1 (647 amino acids) Uncharacterized ORF; Succinate dehydrogenase flavoprotein subunit; role in the citric acid cycle; up-regulated in conidia exposed to neutrophils and during conidial germination; hypoxia repressed protein and transcript; induced by exposure to artemisinin	4.65	0.2488	1	4	9	10	647	71.1	6.98
Afu3g08110	Afu3g08110 AspGDID:ASPL0000105214 COORDS:Chr3_A_fumigatus_Af293:2077251-2079098W, translated using codon table 1 (615 amino acids) Uncharacterized ORF; Putative cell wall protein; transcript downregulated in response to amphotericin B and calcium	7.77	0.0715	1	3	3	3	615	60.1	4.55
Afu3g08160	tif1 AspGDID:ASPL0000105219 COORDS:Chr3_A_fumigatus_Af293:2095759-2094223C, translated using codon table 1 (406 amino acids) Verified ORF; Eukaryotic translation initiation factor eIF4A; ATP-dependent RNA helicase; protein induced by heat shock; predicted gene pair with AFUA_5G02410	3.99	0.2808	2	3	9	9	406	45.7	5.19
Afu3g08190	Afu3g08190 AspGDID:ASPL0000105222 COORDS:Chr3_A_fumigatus_Af293:2099384-2100293W, translated using codon table 1 (257 amino acids) Uncharacterized ORF; Ortholog of <i>A. nidulans FGSC A4</i> : AN2935, <i>A. oryzae RIB40</i> : AO090005001459, <i>Aspergillus wentii</i> : Aspwe1_0041896 and <i>Aspergillus sydowii</i> : Aspsy1_0066733	0	0.214	1	1	3	3	257	26.3	9.48
Afu3g08200	ams1 AspGDID:ASPL0000105223 COORDS:Chr3_A_fumigatus_Af293:2103989-2100561C, translated using codon table 1 (1088 amino acids) Verified ORF; Putative Class IIC alpha-mannosidase with a predicted role in oligosaccharide catabolism and N-glycan processing	7.07	0.1958	1	5	16	16	1088	123.7	6.27
Afu3g08270	pdx1 AspGDID:ASPL0000105230 COORDS:Chr3_A_fumigatus_Af293:2128733-2130157W, translated using codon table 1 (323 amino acids) Uncharacterized ORF; Pyruvate dehydrogenase complex component; hypoxia induced protein	3.19	0.2353	1	4	7	7	323	34.8	9.32
Afu3g08380	ipp1 AspGDID:ASPL0000105241 COORDS:Chr3_A_fumigatus_Af293:2149763-2148296C, translated using codon table 1 (396 amino acids) Uncharacterized ORF; Putative inorganic diphosphatase; reacts with rabbit immunosera exposed to A. fumigatus conidia	8.97	0.4672	1	8	12	12	396	43.6	7.77
Afu3g08460	Afu3g08460 AspGDID:ASPL0000105249 COORDS:Chr3_A_fumigatus_Af293:2169117-2168265C, translated using codon table 1 (109 amino acids) Uncharacterized ORF; 60S ribosomal protein L35Ae	0	0.2385	1	1	2	2	109	12.3	11.22
Afu3g08470	Afu3g08470 AspGDID:ASPL0000105250 COORDS:Chr3_A_fumigatus_Af293:2171618-2174019W, translated using codon table 1 (511 amino acids) Verified ORF; Glucose-6-phosphate 1-dehydrogenase	3.32	0.1233	1	1	5	6	511	58.9	7.01
Afu3g08660	idp1 AspGDID:ASPL0000105268 COORDS:Chr3_A_fumigatus_Af293:2219058-2221293W, translated using codon table 1 (501 amino acids) Uncharacterized ORF; Putative isocitrate dehydrogenase; protein induced by heat shock	6.86	0.2216	1	8	11	11	501	55.7	8.73
Afu3g08840	Afu3g08840 AspGDID:ASPL0000105285 COORDS:Chr3_A_fumigatus_Af293:2262208-2266262W, translated using codon table 1 (1212 amino acids) Uncharacterized ORF; Ortholog(s) have role in hyphal growth, nuclear division and Golgi apparatus, hyphal tip localization	6.69	0.1007	1	1	6	8	1212	135.8	6.28
Afu3g08980	Afu3g08980 AspGDID:ASPL0000105299 COORDS:Chr3_A_fumigatus_Af293:2294770-2296443W, translated using codon table 1 (536 amino acids) Uncharacterized ORF; Ortholog(s) have threonine synthase activity, role in threonine biosynthetic process and cytosol, nucleus localization	4.18	0.2836	1	7	12	13	536	59.2	6.2
Afu3g09280	Afu3g09280 AspGDID:ASPL0000105325 COORDS:Chr3_A_fumigatus_Af293:2354001-2355185W, translated using codon table 1 (308 amino acids) Uncharacterized ORF; Has domain(s) with predicted ribosome binding, translation initiation factor activity, role in regulation of translational initiation and eukaryotic translation initiation factor 3 complex localization	1.75	0.0877	1	1	3	4	308	34.3	5.26
Afu3g09320	Afu3g09320 AspGDID:ASPL0000105330 COORDS:Chr3_A_fumigatus_Af293:2359631-2361249W, translated using codon table 1 (471 amino acids) Uncharacterized ORF; Serine hydroxymethyltransferase; protein level decreases upon heat shock; reacts with rabbit immunosera exposed to A. fumigatus conidia; hypoxia induced protein; SrbA-regulated during hypoxia	9.86	0.3333	1	6	13	17	471	51.8	7.75
Afu3g09550	Afu3g09550 AspGDID:ASPL0000105353 COORDS:Chr3_A_fumigatus_Af293:2427826-2426429C, translated using codon table 1 (394 amino acids) Uncharacterized ORF; Calcium/calmodulin dependent protein kinase	0	0.269	1	1	6	6	394	44.3	6.84
Afu3g10000	pkaR AspGDID:ASPL0000105398 COORDS:Chr3_A_fumigatus_Af293:2570161-2571402W, translated using codon table 1 (413 amino acids) Verified ORF; cAMP-dependent protein kinase regulatory subunit; induced by endothelial cells and human airway epithelial cells; mutants sensitive to storage in water and contain more nuclei than wild-type; up-regulated in neutrophil-exposed conidia	2.67	0.1501	1	3	6	6	413	44.5	5.19
Afu3g10540	Afu3g10540 AspGDID:ASPL0000105452 COORDS:Chr3_A_fumigatus_Af293:2730358-2729291C, translated using codon table 1 (321 amino acids) Uncharacterized ORF; Has domain(s) with predicted oxidoreductase activity and role in metabolic process	2.58	0.1277	1	1	3	3	321	33.4	8.88
Afu3g10730	Afu3g10730 AspGDID:ASPL0000105471 COORDS:Chr3_A_fumigatus_Af293:2781133-2780135C, translated using codon table 1 (201 amino acids) Uncharacterized ORF; 40S ribosomal protein S7e	6.21	0.3682	1	3	6	6	201	22.8	10.15
Afu3g11260	Afu3g11260 AspGDID:ASPL0000105524 COORDS:Chr3_A_fumigatus_Af293:2951140-2951715W, translated using codon table 1 (154 amino acids) Uncharacterized ORF; Ubiquitin	3.12	0.2338	3	3	3	4	154	17.7	9.77
Afu3g11350	arsA AspGDID:ASPL0000105533 COORDS:Chr3_A_fumigatus_Af293:2972476-2973613W, translated using codon table 1 (340 amino acids) Uncharacterized ORF; ATPase; proteins are recognized and bound by Get3p then delivered to the ER	0	0.0853	1	1	2	2	340	37.4	5.1
Afu3g11400	pep2 AspGDID:ASPL0000105538 COORDS:Chr3_A_fumigatus_Af293:2990626-2992029W, translated using codon table 1 (398 amino acids) Verified ORF; Aspartic acid endopeptidase; conidia-enriched protein; conidial surface associated; predicted signal secretion sequence; hypoxia induced protein; transcript up-regulated in conidia exposed to neutrophils and by growth on BSA	3.08	0.2312	1	2	5	6	398	43.3	5
Afu3g11690	Afu3g11690 AspGDID:ASPL0000105565 COORDS:Chr3_A_fumigatus_Af293:3071255-3069978C, translated using codon table 1 (360 amino acids) Uncharacterized ORF; Putative class II fructose-bisphosphate aldolase; immunoreactive protein; reacts with rabbit immunosera exposed to A. fumigatus conidia; hypoxia induced protein	9.95	0.3167	1	8	10	10	360	39.8	5.85
Afu3g11710	Afu3g11710 AspGDID:ASPL0000105567 COORDS:Chr3_A_fumigatus_Af293:3077527-3075881C, translated using codon table 1 (374 amino acids) Uncharacterized ORF; Ortholog(s) have mRNA binding, saccharopine dehydrogenase (NAD+, L-lysine-forming) activity, role in lysine biosynthetic process via aminoadipic acid and cytoplasm localization	2.43	0.1952	1	1	5	6	374	41.2	5.34
Afu3g11750	Afu3g11750 AspGDID:ASPL0000105571 COORDS:Chr3_A_fumigatus_Af293:3087063-3085609C, translated using codon table 1 (416 amino acids) Uncharacterized ORF; Ortholog(s) have oxysterol binding, phosphatidic acid binding, phosphatidylinositol-4,5-bisphosphate binding, phosphatidylinositol-4-phosphate binding, sterol transporter activity	0	0.0962	1	1	4	4	416	46.7	7.25
Afu3g11830	pgmA AspGDID:ASPL0000105579 COORDS:Chr3_A_fumigatus_Af293:3113884-3115685W, translated using codon table 1 (555 amino acids) Uncharacterized ORF; Putative phosphoglucomutase; reacts with rabbit immunosera exposed to A. fumigatus conidia; hypoxia repressed protein; transcript up-regulated in conidia exposed to neutrophils	14.21	0.2847	1	8	12	13	555	60.5	6.76
Afu3g12300	Afu3g12300 AspGDID:ASPL0000105626 COORDS:Chr3_A_fumigatus_Af293:3242604-3243283W, translated using codon table 1 (124 amino acids) Uncharacterized ORF; 60S ribosomal protein L22	2.15	0.4355	1	4	5	6	124	14.2	9.41
Afu3g12690	glfA AspGDID:ASPL0000105665 COORDS:Chr3_A_fumigatus_Af293:3368002-3366055C, translated using codon table 1 (532 amino acids) Verified ORF; Putative UDP-galactopyranose mutase, enzyme in the first step of galactofuranose biosynthesis; mutant unmasks mannan residues on the cell surface, which is thought to contribute to increased cell adhesion	0	0.1278	1	2	7	7	532	59.4	6.93
Afu3g13320	rps0 AspGDID:ASPL0000105727 COORDS:Chr3_A_fumigatus_Af293:3533778-3534743W, translated using codon table 1 (297 amino acids) Uncharacterized ORF; Putative 40S ribosomal protein S0	2.56	0.2155	1	4	4	5	297	32.1	4.91
Afu3g13480	Afu3g13480 AspGDID:ASPL0000105743 COORDS:Chr3_A_fumigatus_Af293:3565478-3566600W, translated using codon table 1 (308 amino acids) Uncharacterized ORF; Translation initiation factor 2 alpha subunit	6.98	0.3019	1	3	7	8	308	35	5.82
Afu3g13820	Afu3g13820 AspGDID:ASPL0000105775 COORDS:Chr3_A_fumigatus_Af293:3651038-3650223C, translated using codon table 1 (201 amino acids) Uncharacterized ORF; Putative HET-C2 protein; transcript induced by exposure to human airway epithelial cells	4.55	0.2736	1	2	4	4	201	22.2	6.95
Afu3g14230	Afu3g14230 AspGDID:ASPL0000105813 COORDS:Chr3_A_fumigatus_Af293:3782788-3781438C, translated using codon table 1 (406 amino acids) Uncharacterized ORF; Putative BAR adaptor protein: calcium induced	0	0.2094	1	2	8	8	406	46.6	6.98
Afu3g14430	Afu3g14430 AspGDID:ASPL0000105833 COORDS:Chr3_A_fumigatus_Af293:3835669-3836453W, translated using codon table 1 (184 amino acids) Uncharacterized ORF; Ortholog(s) have role in regulation of mitotic cell cycle and cytosol, nucleus localization	0	0.1793	1	1	2	2	184	20.8	8.98
Afu3g14490	Afu3g14490 AspGDID:ASPL0000105838 COORDS:Chr3_A_fumigatus_Af293:3844977-3843396C, translated using codon table 1 (508 amino acids) Uncharacterized ORF; Putative ketol acid reductoisomerase; transcript induced by exposure to human airway epithelial cells; no human homolog	4.68	0.1122	1	4	5	6	508	56.3	9.29
Afu3g14680	plb3 AspGDID:ASPL0000105858 COORDS:Chr3_A_fumigatus_Af293:3893246-3895138W, translated using codon table 1 (630 amino acids) Uncharacterized ORF; Putative secreted lysophospholipase B; transcript induced by lecithin and by voriconazole; hypoxia induced protein; induced by exposure to artemisinin	0	0.254	1	1	11	12	630	67.4	5.66
Afu4g00960	pfkA AspGDID:ASPL0000106014 COORDS:Chr4_A_fumigatus_Af293:259114-261643W, translated using codon table 1 (808 amino acids) Uncharacterized ORF; Putative phosphofructokinase; reacts with rabbit immunosera exposed to A. fumigatus conidia	1.75	0.245	1	2	12	13	808	88.7	7.09
Afu4g02790	Afu4g02790 AspGDID:ASPL0000106098 COORDS:Chr4_A_fumigatus_Af293:775158-774079C, translated using codon table 1 (310 amino acids) Uncharacterized ORF; Has domain(s) with predicted hydrolase activity, acting on carbon-nitrogen (but not peptide) bonds activity and role in nitrogen compound metabolic process	2.24	0.1	1	2	2	2	310	33.8	7.42
Afu4g03322	Afu4g03322 AspGDID:ASPL0000365151 COORDS:Chr4_A_fumigatus_Af293:944673-943800C, translated using codon table 1 (257 amino acids) Uncharacterized ORF; Ortholog of <i>A. nidulans FGSC A4</i> : AN7177, <i>A. niger CBS 513.88</i> : An14g01990, <i>A. oryzae RIB40</i> : AO090011000139, <i>Aspergillus sydowii</i> : Aspsy1_0052594 and <i>Aspergillus terreus NIH2624</i> : ATET_02136	1.99	0.2374	1	1	4	4	257	28.9	4.87
Afu4g03880	Afu4g03880 AspGDID:ASPL0000106207 COORDS:Chr4_A_fumigatus_Af293:1090760-1092367W, translated using codon table 1 (251 amino acids) Uncharacterized ORF; 60S ribosomal protein L7	8.24	0.3347	1	5	7	7	251	29	10.04
Afu4g03930	Afu4g03930 AspGDID:ASPL0000106212 COORDS:Chr4_A_fumigatus_Af293:1103790-1105475W, translated using codon table 1 (526 amino acids) Uncharacterized ORF; Putative cysteine synthase B; transcript induced by exposure to human airway epithelial cells	32.55	0.4144	1	8	13	17	526	58.3	6.33
Afu4g04318	Afu4g04318 AspGDID:ASPL0000366886 COORDS:Chr4_A_fumigatus_Af293:1217563-1217111C, translated using codon table 1 (111 amino acids) Uncharacterized ORF; Ortholog of <i>A. nidulans FGSC A4</i> : AN7011, <i>A. niger CBS 513.88</i> : An14g00530, <i>Aspergillus wentii</i> : Aspwe1_0053203, <i>Aspergillus sydowii</i> : Aspsy1_0184132 and <i>Aspergillus terreus NIH2624</i> : ATET_02726	2.03	0.5495	1	1	4	4	111	11.3	7.39
Afu4g04460	Afu4g04460 AspGDID:ASPL0000106264 COORDS:Chr4_A_fumigatus_Af293:1261402-1262578W, translated using codon table 1 (226 amino acids) Uncharacterized ORF; 60S ribosomal protein L13	1.71	0.385	1	5	8	8	226	25.6	10.65
Afu4g04520	Afu4g04520 AspGDID:ASPL0000106270 COORDS:Chr4_A_fumigatus_Af293:1276859-1275057C, translated using codon table 1 (444 amino acids) Uncharacterized ORF; Ortholog(s) have mitochondrion localization	2.03	0.1419	1	2	5	5	444	48	5.71
Afu4g04600	Afu4g04600 AspGDID:ASPL0000106278 COORDS:Chr4_A_fumigatus_Af293:1293909-1292651C, translated using codon table 1 (380 amino acids) Uncharacterized ORF; Ortholog(s) have holocytochrome-c synthase activity and role in aerobic respiration, cytochrome c-heme linkage, filamentous growth of a population of unicellular organisms, sporocarp development involved in sexual reproduction	0	0.0816	1	1	2	2	380	42.2	7.66
Afu4g06060	Afu4g06060 AspGDID:ASPL0000106323 COORDS:Chr4_A_fumigatus_Af293:1550122-1546753C, translated using codon table 1 (1052 amino acids) Uncharacterized ORF; Ortholog of <i>A. nidulans FGSC A4</i> : AN4314, <i>A. niger CBS 513.88</i> : An04g00300, <i>A. oryzae RIB40</i> : AO090023000990, <i>Aspergillus wentii</i> : Aspwe1_0034783 and <i>Aspergillus sydowii</i> : Aspsy1_0073108	0	0.1274	1	1	8	9	1052	115.5	7.71
Afu4g06140	Afu4g06140 AspGDID:ASPL0000106331 COORDS:Chr4_A_fumigatus_Af293:1576220-1573718C, translated using codon table 1 (780 amino acids) Uncharacterized ORF; Ortholog(s) have dipeptidyl-peptidase activity and cytoplasm, nucleus localization	0	0.0423	1	1	3	3	780	87.2	6.68
Afu4g06390	Afu4g06390 AspGDID:ASPL0000106356 COORDS:Chr4_A_fumigatus_Af293:1638303-1639644W, translated using codon table 1 (333 amino acids) Uncharacterized ORF; Ortholog(s) have mitochondrion localization	0	0.2643	1	1	6	7	333	36.3	9.35
Afu4g06620	Afu4g06620 AspGDID:ASPL0000106377 COORDS:Chr4_A_fumigatus_Af293:1712343-1713780W, translated using codon table 1 (458 amino acids) Uncharacterized ORF; Glutamate/Leucine/Phenylalanine/Valine dehydrogenase; reacts with rabbit immunosera exposed to A. fumigatus conidia; hypoxia induced protein	12.42	0.4672	1	9	14	15	458	49.3	6.1
Afu4g06820	ecm33 AspGDID:ASPL0000106396 COORDS:Chr4_A_fumigatus_Af293:1762211-1763534W, translated using codon table 1 (398 amino acids) Verified ORF; Putative glycophosphatidylinositol (GPI)-anchored cell wall protein with similarity to S. cerevisiae Ecm33p; mutant conidia display a cell separation defect; hypoxia induced protein	2.76	0.0955	1	1	3	4	398	41.5	4.98
Afu4g06830	Afu4g06830 AspGDID:ASPL0000106397 COORDS:Chr4_A_fumigatus_Af293:1765069-1764302C, translated using codon table 1 (190 amino acids) Uncharacterized ORF; Ortholog(s) have SUMO transferase activity and role in cellular response to DNA damage stimulus, hyphal growth, mitotic spindle elongation, protein sumoylation, regulation of mitotic cell cycle	1.98	0.2316	1	2	3	5	190	21.9	9.22
Afu4g07360	metH AspGDID:ASPL0000106450 COORDS:Chr4_A_fumigatus_Af293:1914045-1911526C, translated using codon table 1 (774 amino acids) Uncharacterized ORF; Putative cobalamin-independent methionine synthase; protein induced by heat shock; Yap1-dependent induction in response to hydrogen peroxide; reacts with rabbit immunosera exposed to A. fumigatus conidia; no human homolog	9.97	0.3915	1	13	22	26	774	86.8	6.79
Afu4g07435	Afu4g07435 AspGDID:ASPL0000106458 COORDS:Chr4_A_fumigatus_Af293:1932665-1931582C, translated using codon table 1 (166 amino acids) Uncharacterized ORF; 60S ribosomal protein L36	1.97	0.1928	1	1	3	3	166	19	11.91
Afu4g07580	Afu4g07580 AspGDID:ASPL0000106473 COORDS:Chr4_A_fumigatus_Af293:1969969-1971642W, translated using codon table 1 (516 amino acids) Uncharacterized ORF; Translation initiation factor EF-2 gamma subunit	8.41	0.3643	1	6	12	13	516	56.1	7.09
Afu4g07650	cyp6 AspGDID:ASPL0000106480 COORDS:Chr4_A_fumigatus_Af293:1987776-1988776W, translated using codon table 1 (209 amino acids) Uncharacterized ORF; Putative peptidyl-prolyl cis-trans isomerase	2.23	0.2249	1	2	3	3	209	22.9	8.28
Afu4g07690	Afu4g07690 AspGDID:ASPL0000106484 COORDS:Chr4_A_fumigatus_Af293:2001294-2003380W, translated using codon table 1 (595 amino acids) Uncharacterized ORF; Putative phosphoribosylaminoimidazole-carboxamide formyltransferase/IMP cyclohydrolase; hypoxia repressed protein	0	0.1563	1	1	5	6	595	65	6.86
Afu4g07700	Afu4g07700 AspGDID:ASPL0000106485 COORDS:Chr4_A_fumigatus_Af293:2006286-2011744W, translated using codon table 1 (1679 amino acids) Uncharacterized ORF; Clathrin, heavy chain; transcript downregulated in response to amphotericin B	7.47	0.1459	1	8	16	18	1679	191.2	5.34
Afu4g07710	Afu4g07710 AspGDID:ASPL0000106486 COORDS:Chr4_A_fumigatus_Af293:2014380-2018024W, translated using codon table 1 (1193 amino acids) Uncharacterized ORF; Putative pyruvate carboxylase; protein induced by heat shock	19.6	0.3026	1	15	24	24	1193	131.2	6.7
Afu4g07730	Afu4g07730 AspGDID:ASPL0000106488 COORDS:Chr4_A_fumigatus_Af293:2023719-2022959C, translated using codon table 1 (176 amino acids) Uncharacterized ORF; 60S ribosomal protein L11; transcript induced by exposure to human airway epithelial cells	2.31	0.1989	1	2	2	2	176	20.1	10.02
Afu4g08060	Afu4g08060 AspGDID:ASPL0000106520 COORDS:Chr4_A_fumigatus_Af293:2094254-2096039W, translated using codon table 1 (537 amino acids) Uncharacterized ORF; Ortholog(s) have tetrahydrofolylpolyglutamate synthase activity, role in one-carbon metabolic process, regulation of DNA methylation and cytosol, mitochondrion, nucleus localization	1.76	0.1434	1	1	4	4	537	59.3	6.73
Afu4g08480	Afu4g08480 AspGDID:ASPL0000106562 COORDS:Chr4_A_fumigatus_Af293:2190795-2194480W, translated using codon table 1 (1140 amino acids) Uncharacterized ORF; Ortholog(s) have cytosol, nucleus localization	0	0.1544	1	2	10	12	1140	124.7	5.15
Afu4g08550	Afu4g08550 AspGDID:ASPL0000106568 COORDS:Chr4_A_fumigatus_Af293:2210997-2212211W, translated using codon table 1 (404 amino acids) Uncharacterized ORF; Ortholog(s) have cytosol, nucleus localization	0	0.0545	1	1	2	2	404	44.2	5.94
Afu4g08570	Afu4g08570 AspGDID:ASPL0000106570 COORDS:Chr4_A_fumigatus_Af293:2218276-2215586C, translated using codon table 1 (896 amino acids) Uncharacterized ORF; Ortholog(s) have role in positive regulation of cell-substrate adhesion, regulation of filamentous growth, signal transduction involved in conjugation with cellular fusion and endoplasmic reticulum localization	2.64	0.1384	1	1	9	9	896	95.9	8.31
Afu4g08580	prx1 AspGDID:ASPL0000106571 COORDS:Chr4_A_fumigatus_Af293:2220262-2219313C, translated using codon table 1 (222 amino acids) Uncharacterized ORF; Mitochondrial peroxiredoxin; predicted role in cell redox homeostasis regulation; protein levels increase with amphotericin B and H2O2 exposure; transcript up-regulated in conidia exposed to neutrophils; repressed by gliotoxin exposure	4.16	0.2793	1	4	5	6	222	24.5	6.14
Afu4g09110	ccp1 AspGDID:ASPL0000106626 COORDS:Chr4_A_fumigatus_Af293:2379568-2378394C, translated using codon table 1 (366 amino acids) Uncharacterized ORF; Putative cytochrome c peroxidase; protein induced by heat shock and by hydrogen peroxide; transcript up-regulated in conidia exposed to neutrophils	0	0.1585	1	1	4	4	366	40.4	8.56
Afu4g09560	zrfC AspGDID:ASPL0000106671 COORDS:Chr4_A_fumigatus_Af293:2496693-2494977C, translated using codon table 1 (521 amino acids) Verified ORF; Zinc transporter that functions in neutral or alkaline environments; required for virulence; shares a divergent promoter with aspf2	0	0.0384	1	1	2	2	521	54.2	5.54
Afu4g09580	aspf2 AspGDID:ASPL0000106672 COORDS:Chr4_A_fumigatus_Af293:2497565-2498644W, translated using codon table 1 (314 amino acids) Verified ORF; Allergen Asp f 2; expressed in alkaline zinc-limiting conditions; shares a divergent promoter with zrfC; higher expression in biofilm vs planktonic cells; fibrinogen binding protein; signal peptide and 4 possible glycosylation sites	21.18	0.2197	1	4	5	9	314	33.3	5.64
Afu4g10020	Afu4g10020 AspGDID:ASPL0000106716 COORDS:Chr4_A_fumigatus_Af293:2596776-2595828C, translated using codon table 1 (242 amino acids) Uncharacterized ORF; Ortholog(s) have Golgi apparatus, cytoplasmic vesicle localization	0	0.186	1	1	4	4	242	26.1	4.6
Afu4g10200	rfeF AspGDID:ASPL0000106734 COORDS:Chr4_A_fumigatus_Af293:2660389-2663660W, translated using codon table 1 (706 amino acids) Uncharacterized ORF; Putative transcription factor; calcium induced	1.82	0.0567	1	1	3	3	706	75.1	5.03
Afu4g10370	Afu4g10370 AspGDID:ASPL0000106751 COORDS:Chr4_A_fumigatus_Af293:2710311-2709274C, translated using codon table 1 (345 amino acids) Uncharacterized ORF; Ortholog(s) have 3-demethylubiquinone-6 3-O-methyltransferase activity, hexaprenyldihydroxybenzoate methyltransferase activity and role in cellular response to cadmium ion, detoxification of cadmium ion, ubiquinone biosynthetic process	0	0.2754	1	1	4	6	345	37.7	7.21
Afu4g10410	Afu4g10410 AspGDID:ASPL0000106755 COORDS:Chr4_A_fumigatus_Af293:2732043-2730416C, translated using codon table 1 (429 amino acids) Uncharacterized ORF; Putative aspartate aminotransferase; reacts with rabbit immunosera exposed to A. fumigatus conidia; hypoxia induced protein; transcript induced in conidia exposed to neutrophils or to human airway epithelial cells	2.46	0.2564	1	3	8	8	429	47	8.87
Afu4g10800	Afu4g10800 AspGDID:ASPL0000106793 COORDS:Chr4_A_fumigatus_Af293:2823433-2822224C, translated using codon table 1 (237 amino acids) Uncharacterized ORF; 40S ribosomal protein S6	4.1	0.3629	1	3	7	7	237	27.3	10.84
Afu4g11080	facA AspGDID:ASPL0000106818 COORDS:Chr4_A_fumigatus_Af293:2893854-2891549C, translated using codon table 1 (670 amino acids) Uncharacterized ORF; Putative acetyl-coenzyme A synthetase with a predicted role in acetate metabolism; transcript up-regulated in conidia exposed to neutrophils; protein induced by heat shock; hypoxia repressed protein	3.57	0.1567	1	6	10	12	670	74.4	6.44
Afu4g11250	cafA AspGDID:ASPL0000106834 COORDS:Chr4_A_fumigatus_Af293:2943732-2944595W, translated using codon table 1 (287 amino acids) Uncharacterized ORF; Putative carbonic anhydrase; decreased conidiation in the mutant; hypoxia induced protein	2.52	0.1812	1	1	2	2	287	30.8	8.31
Afu4g11330	Afu4g11330 AspGDID:ASPL0000106842 COORDS:Chr4_A_fumigatus_Af293:2975120-2976392W, translated using codon table 1 (379 amino acids) Uncharacterized ORF; Ortholog(s) have ATPase activator activity, chaperone binding activity, role in protein folding, response to stress and cytosol localization	1.63	0.1979	1	1	5	5	379	42.3	6.04
Afu4g11340	lys9 AspGDID:ASPL0000106843 COORDS:Chr4_A_fumigatus_Af293:2978580-2976809C, translated using codon table 1 (450 amino acids) Uncharacterized ORF; Saccharopine dehydrogenase; hypoxia induced protein; transcript induced by exposure to human airway epithelial cells	0	0.2622	1	2	7	7	450	49.4	6.28
Afu4g11650	kgd1 AspGDID:ASPL0000106873 COORDS:Chr4_A_fumigatus_Af293:3079845-3083210W, translated using codon table 1 (1057 amino acids) Uncharacterized ORF; Putative alpha-ketoglutarate dehydrogenase complex subunit; protein induced by heat shock	4.71	0.1533	1	1	11	13	1057	118.8	6.95
Afu4g11730	gldB AspGDID:ASPL0000106881 COORDS:Chr4_A_fumigatus_Af293:3102011-3103045W, translated using codon table 1 (325 amino acids) Verified ORF; Putative glycerol dehydrogenase; calcium induced; transcript induced by exposure to human airway epithelial cells	4.99	0.2492	1	4	5	5	325	36.8	6.37
Afu4g12060	Afu4g12060 AspGDID:ASPL0000106913 COORDS:Chr4_A_fumigatus_Af293:3170893-3172683W, translated using codon table 1 (349 amino acids) Uncharacterized ORF; Ortholog(s) have role in ascospore formation, cellular response to biotic stimulus and cellular response to starvation, <a href="#GOsection">more</a>	2.81	0.1089	1	1	4	4	349	40.5	8.05
Afu4g12450	Afu4g12450 AspGDID:ASPL0000106952 COORDS:Chr4_A_fumigatus_Af293:3270803-3272689W, translated using codon table 1 (541 amino acids) Uncharacterized ORF; Putative PH domain protein; conserved lysine-rich protein; Yap1-dependent induction in response to hydrogen peroxide; hypoxia repressed protein	8.08	0.1885	1	5	9	10	541	57	5.03
Afu4g12870	Afu4g12870 AspGDID:ASPL0000106993 COORDS:Chr4_A_fumigatus_Af293:3368445-3370387W, translated using codon table 1 (602 amino acids) Uncharacterized ORF; Putative methylmalonate-semialdehyde dehydrogenase; transcript up-regulated in conidia exposed to neutrophils	0	0.0764	1	1	3	3	602	63.8	8.03
Afu4g12920	Afu4g12920 AspGDID:ASPL0000106998 COORDS:Chr4_A_fumigatus_Af293:3384591-3386472W, translated using codon table 1 (604 amino acids) Uncharacterized ORF; Putative mitochondrial histidyl-tRNA synthetase; protein induced by heat shock	0	0.202	1	2	9	9	604	66.6	7.14
Afu4g12990	trr1 AspGDID:ASPL0000107005 COORDS:Chr4_A_fumigatus_Af293:3402102-3403373W, translated using codon table 1 (392 amino acids) Uncharacterized ORF; Putative thioredoxin reductase; transcript upregulated during conidial germination and in hyphae exposed to neutrophils	0	0.0893	1	1	2	2	392	42.2	5.52
Afu4g13120	Afu4g13120 AspGDID:ASPL0000107018 COORDS:Chr4_A_fumigatus_Af293:3436372-3434668C, translated using codon table 1 (358 amino acids) Uncharacterized ORF; Putative glutamine synthetase; protein induced by heat shock and by hydrogen peroxide; transcript induced by exposure to human airway epithelial cells	7.59	0.3464	1	6	8	9	358	39.9	5.71
Afu4g13170	cpcB AspGDID:ASPL0000107023 COORDS:Chr4_A_fumigatus_Af293:3449811-3448364C, translated using codon table 1 (316 amino acids) Verified ORF; G-protein complex beta subunit; conidia-enriched protein; immunoreactive	4.47	0.4494	1	6	9	10	316	35	6.52
Afu4g13700	Afu4g13700 AspGDID:ASPL0000107076 COORDS:Chr4_A_fumigatus_Af293:3586027-3588483W, translated using codon table 1 (737 amino acids) Uncharacterized ORF; Ortholog(s) have cytosol localization	1.78	0.1316	1	2	8	8	737	84.4	7.09
Afu4g13720	mpkA AspGDID:ASPL0000107078 COORDS:Chr4_A_fumigatus_Af293:3591547-3593138W, translated using codon table 1 (424 amino acids) Verified ORF; Mitogen-activated protein kinase; activated by phosphorylation; role in cell wall signaling and the oxidative stress response; mpkA(p)-lacZ expression increased by cell wall disturbing compounds; required for adaptation to iron starvation	2.55	0.1321	1	1	4	4	424	48.4	5.88
Afu5g00650	Afu5g00650 AspGDID:ASPL0000107249 COORDS:Chr5_A_fumigatus_Af293:183963-182941C, translated using codon table 1 (340 amino acids) Uncharacterized ORF; Protein of unknown function; transcript induced by exposure to human airway epithelial cells	0	0.1176	1	1	3	3	340	38.3	6.46
Afu5g01440	Afu5g01440 AspGDID:ASPL0000107324 COORDS:Chr5_A_fumigatus_Af293:377687-376891C, translated using codon table 1 (202 amino acids) Uncharacterized ORF; Ortholog(s) have thioredoxin peroxidase activity, role in cell redox homeostasis, cellular response to oxidative stress, response to metal ion and peroxisome, plasma membrane localization	9.48	0.4257	1	4	7	8	202	21.9	8.35
Afu5g01970	gpdA AspGDID:ASPL0000107377 COORDS:Chr5_A_fumigatus_Af293:503797-505194W, translated using codon table 1 (338 amino acids) Verified ORF; Glyceraldehyde-3-phosphate dehydrogenase; predicted gene pair with AFUA_5G01030; protein induced by hydrogen peroxide; reacts with rabbit immunosera exposed to A. fumigatus conidia: induced by L-tyrosine	29.88	0.3935	2	9	9	12	338	36.3	7.43
Afu5g02030	Afu5g02030 AspGDID:ASPL0000107383 COORDS:Chr5_A_fumigatus_Af293:520484-521754W, translated using codon table 1 (334 amino acids) Uncharacterized ORF; Has domain(s) with predicted mRNA binding activity, role in mRNA polyadenylation and mRNA cleavage factor complex localization	1.86	0.1257	1	1	2	3	334	37.6	6.47
Afu5g02090	Afu5g02090 AspGDID:ASPL0000107389 COORDS:Chr5_A_fumigatus_Af293:531520-531007C, translated using codon table 1 (144 amino acids) Uncharacterized ORF; Ortholog(s) have role in meiotic chromosome segregation and cytosol, nucleus localization	0	0.2639	1	1	3	3	144	16.3	7.5
Afu5g02230	Afu5g02230 AspGDID:ASPL0000107403 COORDS:Chr5_A_fumigatus_Af293:571103-569414C, translated using codon table 1 (545 amino acids) Uncharacterized ORF; Putative actin interacting protein; protein induced by hydrogen peroxide	0	0.1505	1	2	5	7	545	60.3	6.28
Afu5g02370	Afu5g02370 AspGDID:ASPL0000107417 COORDS:Chr5_A_fumigatus_Af293:611752-609421C, translated using codon table 1 (686 amino acids) Uncharacterized ORF; Vacuolar ATP synthase catalytic subunit A; hypoxia induced protein; putative essential gene; induced by exposure to human airway epithelial cells	2.68	0.1122	1	1	5	5	686	74.9	6.19
Afu5g02470	nmt1 AspGDID:ASPL0000107427 COORDS:Chr5_A_fumigatus_Af293:638154-636920C, translated using codon table 1 (342 amino acids) Uncharacterized ORF; Thiamine biosynthesis protein, phoB-regulated; protein induced by H2O2; reacts with rabbit immunosera exposed to conidia; hypoxia induced protein; transcript induced by exposure to human airway epithelial cells; induced by gliotoxin	12.4	0.4678	1	6	9	10	342	38.3	6.44
Afu5g02720	Afu5g02720 AspGDID:ASPL0000107452 COORDS:Chr5_A_fumigatus_Af293:710324-714412W, translated using codon table 1 (1362 amino acids) Uncharacterized ORF; Ortholog(s) have phosphoribosylformylglycinamidine synthase activity, role in purine nucleotide biosynthetic process and Golgi apparatus localization	0	0.1645	1	2	11	14	1362	147.5	6.13
Afu5g02910	Afu5g02910 AspGDID:ASPL0000107470 COORDS:Chr5_A_fumigatus_Af293:772100-770907C, translated using codon table 1 (354 amino acids) Uncharacterized ORF; NAP family protein	0	0.2034	1	1	4	4	354	41	4.5
Afu5g03020	Afu5g03020 AspGDID:ASPL0000107481 COORDS:Chr5_A_fumigatus_Af293:806662-808051W, translated using codon table 1 (373 amino acids) Uncharacterized ORF; 60S ribosomal protein L4	3.59	0.2574	1	4	8	8	373	40.5	10.96
Afu5g03080	aspC AspGDID:ASPL0000107487 COORDS:Chr5_A_fumigatus_Af293:834771-833226C, translated using codon table 1 (384 amino acids) Uncharacterized ORF; Putative septin; hypoxia repressed protein; repressed by exposure to artemisinin	0	0.2292	2	3	6	8	384	44.4	8.73
Afu5g03490	ndk1 AspGDID:ASPL0000107527 COORDS:Chr5_A_fumigatus_Af293:944280-943353C, translated using codon table 1 (153 amino acids) Uncharacterized ORF; Putative nucleoside diphosphate kinase; induced by L-tyrosine	7.45	0.6536	1	5	8	8	153	16.9	7.97
Afu5g03690	Afu5g03690 AspGDID:ASPL0000107547 COORDS:Chr5_A_fumigatus_Af293:987794-986454C, translated using codon table 1 (424 amino acids) Uncharacterized ORF; Ortholog(s) have phosphatidylinositol transporter activity	2.37	0.2028	1	2	5	5	424	46.1	4.84
Afu5g03720	Afu5g03720 AspGDID:ASPL0000107550 COORDS:Chr5_A_fumigatus_Af293:1000630-998589C, translated using codon table 1 (632 amino acids) Uncharacterized ORF; Ortholog(s) have role in ascospore formation, heterochromatin maintenance, negative regulation of histone acetylation and positive regulation of chromatin silencing at centromere, <a href="#GOsection">more</a>	1.8	0.1551	1	1	7	8	632	71	6.47
Afu5g04170	hsp90 AspGDID:ASPL0000107596 COORDS:Chr5_A_fumigatus_Af293:1108402-1110583W, translated using codon table 1 (706 amino acids) Verified ORF; Heat shock protein; allergen Asp f 12; likely essential; required for conidiation and cell wall integrity; transcript induced by growth on hydrogen peroxide; enters the nucleus in response to heat shock	22.6	0.2606	1	9	15	19	706	80.6	5.01
Afu5g04210	Afu5g04210 AspGDID:ASPL0000107600 COORDS:Chr5_A_fumigatus_Af293:1122054-1123659W, translated using codon table 1 (460 amino acids) Uncharacterized ORF; Putative ubiquinol-cytochrome C reductase complex core protein 2; hypoxia induced protein	2.68	0.0696	1	1	2	2	460	48.1	8.91
Afu5g04230	cit1 AspGDID:ASPL0000107602 COORDS:Chr5_A_fumigatus_Af293:1129170-1127276C, translated using codon table 1 (474 amino acids) Verified ORF; Putative citrate synthase; reacts with rabbit immunosera exposed to A. fumigatus conidia; transcript induced by exposure to human airway epithelial cells	9.66	0.2068	1	5	7	8	474	52.1	8.57
Afu5g04330	Afu5g04330 AspGDID:ASPL0000107612 COORDS:Chr5_A_fumigatus_Af293:1164058-1160457C, translated using codon table 1 (967 amino acids) Verified ORF; Putative aminopeptidase; conidia-enriched protein; protein induced by heat shock; repressed by gliotoxin exposure	0	0.031	1	1	2	2	967	108.6	6.71
Afu5g05450	rps1 AspGDID:ASPL0000107624 COORDS:Chr5_A_fumigatus_Af293:1266407-1265371C, translated using codon table 1 (256 amino acids) Uncharacterized ORF; 40S ribosomal protein S3Ae; 40S ribosomal protein S1; reacts with rabbit immunosera exposed to A. fumigatus conidia	14.87	0.4453	1	6	10	12	256	29.2	10.04
Afu5g05460	Afu5g05460 AspGDID:ASPL0000107625 COORDS:Chr5_A_fumigatus_Af293:1268981-1268053C, translated using codon table 1 (242 amino acids) Uncharacterized ORF; Cytosine deaminase-uracil phosphoribosyltransferase fusion protein; transcript induced by exposure to human airway epithelial cells	0	0.2521	1	1	5	7	242	26.9	7.77
Afu5g05680	Afu5g05680 AspGDID:ASPL0000107645 COORDS:Chr5_A_fumigatus_Af293:1322763-1324274W, translated using codon table 1 (464 amino acids) Uncharacterized ORF; Ortholog(s) have translation release factor activity, codon specific activity and role in asexual sporulation resulting in formation of a cellular spore, cellular response to nitrogen starvation, cytokinesis, translational termination	0	0.1121	1	1	4	4	464	51.9	6.48
Afu5g06040	Afu5g06040 AspGDID:ASPL0000107681 COORDS:Chr5_A_fumigatus_Af293:1435345-1436944W, translated using codon table 1 (376 amino acids) Uncharacterized ORF; Ortholog(s) have ubiquitin binding activity, role in negative regulation of protein catabolic process, nucleotide-excision repair, protein ubiquitination and cytosol, nuclear envelope localization	0	0.1223	1	1	3	3	376	39.8	4.64
Afu5g06130	Afu5g06130 AspGDID:ASPL0000107690 COORDS:Chr5_A_fumigatus_Af293:1465997-1464574C, translated using codon table 1 (331 amino acids) Uncharacterized ORF; Succinyl-CoA synthetase alpha subunit; hypoxia induced protein	1.61	0.142	1	3	4	5	331	34.6	8.63
Afu5g06360	Afu5g06360 AspGDID:ASPL0000107712 COORDS:Chr5_A_fumigatus_Af293:1531695-1530676C, translated using codon table 1 (254 amino acids) Uncharacterized ORF; 60S ribosomal protein L8; transcript induced by exposure to human airway epithelial cells	0	0.1496	1	1	3	3	254	27.5	10.98
Afu5g06400	Afu5g06400 AspGDID:ASPL0000107716 COORDS:Chr5_A_fumigatus_Af293:1542200-1539235C, translated using codon table 1 (862 amino acids) Uncharacterized ORF; Ortholog of <i>A. nidulans FGSC A4</i> : AN2271, <i>A. niger CBS 513.88</i> : An17g01320, <i>Aspergillus wentii</i> : Aspwe1_0023481, <i>Aspergillus sydowii</i> : Aspsy1_0054275 and <i>Aspergillus terreus NIH2624</i> : ATET_09392	0	0.1206	1	1	4	5	862	95.7	6.92
Afu5g07150	Afu5g07150 AspGDID:ASPL0000107790 COORDS:Chr5_A_fumigatus_Af293:1777140-1779038W, translated using codon table 1 (591 amino acids) Uncharacterized ORF; Ortholog(s) have phosphatidylinositol-3-phosphate binding, protein transporter activity	0	0.1371	1	1	7	7	591	65	6.92
Afu5g07780	erg1 AspGDID:ASPL0000107850 COORDS:Chr5_A_fumigatus_Af293:1942829-1944341W, translated using codon table 1 (481 amino acids) Verified ORF; Putative squalene monooxygenase; higher expression in 48 h biofilm vs planktonic cells; SrbA-regulated during hypoxia	1.77	0.079	1	1	3	3	481	52.6	8.68
Afu5g08040	Afu5g08040 AspGDID:ASPL0000107876 COORDS:Chr5_A_fumigatus_Af293:2039317-2035331C, translated using codon table 1 (1165 amino acids) Uncharacterized ORF; Ortholog(s) have role in Golgi inheritance, Golgi to plasma membrane transport, cytokinetic cell separation, endocytosis, endoplasmic reticulum inheritance, exocytosis	0	0.0927	1	1	6	7	1165	130.2	5.85
Afu5g08090	pyroA AspGDID:ASPL0000107881 COORDS:Chr5_A_fumigatus_Af293:2051048-2050001C, translated using codon table 1 (308 amino acids) Uncharacterized ORF; Putative pyridoxine biosynthesis protein	9.15	0.3409	1	4	8	9	308	32.7	6.43
Afu5g08270	Afu5g08270 AspGDID:ASPL0000107899 COORDS:Chr5_A_fumigatus_Af293:2100834-2100024C, translated using codon table 1 (244 amino acids) Uncharacterized ORF; Putative HAD superfamily hydrolase; hypoxia repressed protein	0	0.2254	1	1	4	4	244	27.3	5.05
Afu5g08290	Afu5g08290 AspGDID:ASPL0000107901 COORDS:Chr5_A_fumigatus_Af293:2105292-2104352C, translated using codon table 1 (283 amino acids) Uncharacterized ORF; Ortholog(s) have intracellular localization	0	0.2332	1	1	6	6	283	31.4	6.7
Afu5g08450	Afu5g08450 AspGDID:ASPL0000107916 COORDS:Chr5_A_fumigatus_Af293:2149562-2146870C, translated using codon table 1 (780 amino acids) Uncharacterized ORF; Ortholog of <i>A. nidulans FGSC A4</i> : AN12000, <i>A. niger CBS 513.88</i> : An03g04710, <i>A. oryzae RIB40</i> : AO090701000765, <i>Aspergillus wentii</i> : Aspwe1_0023675 and <i>Aspergillus terreus NIH2624</i> : ATET_08223	0	0.0769	1	1	2	2	780	86.5	5.05
Afu5g08540	aspA AspGDID:ASPL0000107925 COORDS:Chr5_A_fumigatus_Af293:2167838-2169399W, translated using codon table 1 (382 amino acids) Verified ORF; Septin; hypoxia repressed protein; repressed by exposure to artemisinin	4.01	0.288	1	2	7	8	382	43.3	5.14
Afu5g08610	Afu5g08610 AspGDID:ASPL0000107932 COORDS:Chr5_A_fumigatus_Af293:2190190-2191856W, translated using codon table 1 (513 amino acids) Uncharacterized ORF; Ortholog(s) have tRNA threonylcarbamoyladenosine dehydratase activity, role in cyclic threonylcarbamoyladenosine biosynthetic process and mitochondrial outer membrane localization	0	0.152	1	1	5	5	513	56.4	7.5
Afu5g08830	hexA AspGDID:ASPL0000107954 COORDS:Chr5_A_fumigatus_Af293:2265787-2268175W, translated using codon table 1 (537 amino acids) Verified ORF; Putative woronin body protein; hypoxia repressed protein	4.69	0.1788	1	3	8	8	537	61.4	8.79
Afu5g08965	Afu5g08965 AspGDID:ASPL0000365912 COORDS:Chr5_A_fumigatus_Af293:2302499-2303043W, translated using codon table 1 (117 amino acids) Uncharacterized ORF; Ortholog(s) have role in mitochondrial respiratory chain complex IV assembly and cytosol, integral component of mitochondrial inner membrane, mitochondrial intermembrane space, nucleus localization	0	0.2479	1	1	3	3	117	13.3	8.27
Afu5g08990	Afu5g08990 AspGDID:ASPL0000107970 COORDS:Chr5_A_fumigatus_Af293:2308209-2307197C, translated using codon table 1 (272 amino acids) Uncharacterized ORF; Ortholog of <i>A. nidulans FGSC A4</i> : AN4680, <i>A. niger CBS 513.88</i> : An07g04160, <i>A. oryzae RIB40</i> : AO090020000471, <i>Aspergillus wentii</i> : Aspwe1_0048193 and <i>Aspergillus sydowii</i> : Aspsy1_0059440	1.75	0.0956	1	1	2	2	272	30.2	7.58
Afu5g09210	alp2 AspGDID:ASPL0000107990 COORDS:Chr5_A_fumigatus_Af293:2366798-2365176C, translated using codon table 1 (495 amino acids) Verified ORF; Autophagic (vacuolar) serine protease; allergen Asp f 18; predicted signal sequence for secretion; transcript induced by growth on hydrogen peroxide; transcript up-regulated in conidia exposed to neutrophils	1.62	0.1455	1	2	4	5	495	52.6	6.25
Afu5g09230	Afu5g09230 AspGDID:ASPL0000107992 COORDS:Chr5_A_fumigatus_Af293:2377061-2378400W, translated using codon table 1 (324 amino acids) Verified ORF; Putative transaldolase; abundant protein in conidia and mycelia; protein induced by hydrogen peroxide and hypoxia	28.46	0.5432	1	13	15	20	324	35.4	6.44
Afu5g09360	calA AspGDID:ASPL0000108005 COORDS:Chr5_A_fumigatus_Af293:2410482-2408570C, translated using codon table 1 (558 amino acids) Verified ORF; Calcineurin A catalytic subunit; required for normal growth, cell wall integrity, conidiation and virulence	6.1	0.0806	1	3	4	4	558	63.8	5.86
Afu5g09400	Afu5g09400 AspGDID:ASPL0000108009 COORDS:Chr5_A_fumigatus_Af293:2418391-2419402W, translated using codon table 1 (294 amino acids) Uncharacterized ORF; Putative carbonyl reductase; transcript up-regulated in conidia exposed to neutrophils	0	0.1667	1	1	2	2	294	31.4	6.3
Afu5g09560	Afu5g09560 AspGDID:ASPL0000108025 COORDS:Chr5_A_fumigatus_Af293:2468478-2467725C, translated using codon table 1 (224 amino acids) Uncharacterized ORF; Ortholog(s) have unfolded protein binding activity	0	0.1696	1	1	3	3	224	23.2	4.48
Afu5g09660	Afu5g09660 AspGDID:ASPL0000108035 COORDS:Chr5_A_fumigatus_Af293:2496656-2494856C, translated using codon table 1 (446 amino acids) Uncharacterized ORF; Ortholog(s) have role in endosomal transport, regulation of cytokinesis, regulation of fungal-type cell wall organization, regulation of vacuole fusion, non-autophagic, vesicle-mediated transport	7.3	0.2377	1	4	7	9	446	50.5	7.21
Afu5g09910	Afu5g09910 AspGDID:ASPL0000108059 COORDS:Chr5_A_fumigatus_Af293:2564144-2563392C, translated using codon table 1 (217 amino acids) Uncharacterized ORF; Putative p-nitroreductase family protein; protein induced by heat shock; Yap1-dependent induction in response to hydrogen peroxide; induced by gliotoxin exposure	0	0.1198	1	1	2	2	217	24.3	5.91
Afu5g10370	sdh2 AspGDID:ASPL0000108103 COORDS:Chr5_A_fumigatus_Af293:2655836-2654821C, translated using codon table 1 (299 amino acids) Uncharacterized ORF; Iron-sulfur protein subunit of succinate dehydrogenase with a predicted role in the citric acid cycle; transcript up-regulated in conidia exposed to neutrophils; induced by exposure to artemisinin; transcript downregulated by hypoxia	0	0.2441	1	1	6	6	299	33.9	8.92
Afu5g10550	Afu5g10550 AspGDID:ASPL0000108119 COORDS:Chr5_A_fumigatus_Af293:2702208-2700129C, translated using codon table 1 (519 amino acids) Uncharacterized ORF; ATP synthase F1, beta subunit; reacts with rabbit immunosera exposed to A. fumigatus conidia; hypoxia induced protein	5.04	0.1368	1	4	5	6	519	55.6	5.44
Afu5g10610	rip1 AspGDID:ASPL0000108125 COORDS:Chr5_A_fumigatus_Af293:2715644-2714448C, translated using codon table 1 (298 amino acids) Uncharacterized ORF; Ubiquinol-cytochrome c reductase iron-sulphur subunit precursor with a predicted role in oxidative phosphorylation; hypoxia induced protein; induced by exposure to artemisinin; SrbA-regulated during hypoxia	0	0.1745	1	1	2	2	298	32.6	8.95
Afu5g10780	uge5 AspGDID:ASPL0000108140 COORDS:Chr5_A_fumigatus_Af293:2756278-2757615W, translated using codon table 1 (371 amino acids) Verified ORF; UDP-glucose 4-epimerase required for galactose metabolism; hypoxia induced protein	14.81	0.2183	1	5	6	7	371	40.6	6.25
Afu5g11230	rasA AspGDID:ASPL0000108182 COORDS:Chr5_A_fumigatus_Af293:2871589-2870648C, translated using codon table 1 (213 amino acids) Verified ORF; Ras family GTPase protein	2.28	0.3803	1	1	6	6	213	23.9	5.06
Afu5g11320	aspf29 AspGDID:ASPL0000108191 COORDS:Chr5_A_fumigatus_Af293:2903022-2902611C, translated using codon table 1 (110 amino acids) Verified ORF; Allergen Asp f 29; putative thioredoxin	9.15	0.4	1	2	3	4	110	12	5.22
Afu5g11430	Afu5g11430 AspGDID:ASPL0000108202 COORDS:Chr5_A_fumigatus_Af293:2936781-2937984W, translated using codon table 1 (382 amino acids) Verified ORF; Putative quinone oxidoreductase; conidia-enriched protein; hypoxia repressed protein	2.72	0.2094	1	3	5	5	382	41.4	8.9
Afu5g11560	Afu5g11560 AspGDID:ASPL0000108213 COORDS:Chr5_A_fumigatus_Af293:2965961-2964433C, translated using codon table 1 (439 amino acids) Uncharacterized ORF; Ortholog(s) have ATP binding activity	0	0.1595	1	2	5	5	439	47.6	6.55
Afu5g11900	Afu5g11900 AspGDID:ASPL0000108246 COORDS:Chr5_A_fumigatus_Af293:3074783-3079822W, translated using codon table 1 (1617 amino acids) Uncharacterized ORF; Ortholog(s) have cytosol localization	0	0.1194	1	2	14	16	1617	178.1	5.39
Afu5g12180	Afu5g12180 AspGDID:ASPL0000108274 COORDS:Chr5_A_fumigatus_Af293:3157322-3158399W, translated using codon table 1 (247 amino acids) Uncharacterized ORF; Ortholog(s) have Ran GTPase binding activity and role in G1/S transition of mitotic cell cycle, RNA export from nucleus, Ran protein signal transduction, protein import into nucleus, ubiquitin-dependent protein catabolic process	0	0.2065	1	1	3	4	247	27.6	4.98
Afu5g12780	Afu5g12780 AspGDID:ASPL0000108332 COORDS:Chr5_A_fumigatus_Af293:3352075-3353129W, translated using codon table 1 (332 amino acids) Uncharacterized ORF; Ortholog of <i>A. nidulans FGSC A4</i> : AN8430, <i>A. niger CBS 513.88</i> : An18g00330, <i>A. oryzae RIB40</i> : AO090010000134, <i>Neosartorya fischeri NRRL 181</i> : NFIA_074390 and <i>Aspergillus wentii</i> : Aspwe1_0449405	4.36	0.1777	1	2	4	5	332	35.8	5.31
Afu5g13280	Afu5g13280 AspGDID:ASPL0000108381 COORDS:Chr5_A_fumigatus_Af293:3491956-3494139W, translated using codon table 1 (705 amino acids) Uncharacterized ORF; Ortholog of <i>A. nidulans FGSC A4</i> : AN6887, <i>A. niger CBS 513.88</i> : An14g04670, <i>A. oryzae RIB40</i> : AO090120000470, <i>Aspergillus wentii</i> : Aspwe1_0039072 and <i>Aspergillus sydowii</i> : Aspsy1_0145002	0	0.1234	1	1	8	9	705	78.5	8.59
Afu5g13360	Afu5g13360 AspGDID:ASPL0000108389 COORDS:Chr5_A_fumigatus_Af293:3517368-3515148C, translated using codon table 1 (702 amino acids) Uncharacterized ORF; Ortholog(s) have role in cellular response to starvation, cytoplasmic mRNA processing body assembly and deadenylation-independent decapping of nuclear-transcribed mRNA, <a href="#GOsection">more</a>	0	0.094	1	1	3	3	702	76	7.21
Afu5g13450	Afu5g13450 AspGDID:ASPL0000108398 COORDS:Chr5_A_fumigatus_Af293:3535793-3536876W, translated using codon table 1 (249 amino acids) Verified ORF; Putative triosephosphate isomerase; protein abundant in conidia; reacts with rabbit immunosera exposed to A. fumigatus conidia' transcript induced by exposure to human airway epithelial cells	14.43	0.3775	1	7	7	8	249	27.1	5.8
Afu5g13920	wos2 AspGDID:ASPL0000108443 COORDS:Chr5_A_fumigatus_Af293:3643780-3644692W, translated using codon table 1 (201 amino acids) Uncharacterized ORF; Putative Hsp90 binding co-chaperone; reacts with rabbit immunosera exposed to A. fumigatus conidia	0	0.2637	1	3	5	5	201	22.2	4.48
Afu5g14880	Afu5g14880 AspGDID:ASPL0000108536 COORDS:Chr5_A_fumigatus_Af293:3849477-3847948C, translated using codon table 1 (509 amino acids) Uncharacterized ORF; Ortholog(s) have mitochondrion localization	5.17	0.11	1	2	4	4	509	57.5	5.48
Afu5g14890	Afu5g14890 AspGDID:ASPL0000108537 COORDS:Chr5_A_fumigatus_Af293:3850676-3850278C, translated using codon table 1 (132 amino acids) Uncharacterized ORF; Ortholog of <i>A. nidulans FGSC A4</i> : AN4143, AN12170, <i>A. fumigatus Af293</i> : Afu1g00760, <i>Aspergillus wentii</i> : Aspwe1_0177868, Aspwe1_0403846 and <i>Aspergillus niger ATCC 1015</i> : 41666-mRNA	0	0.2424	1	1	2	2	132	14.6	9.7
Afu6g00660	Afu6g00660 AspGDID:ASPL0000108620 COORDS:Chr6_A_fumigatus_Af293:170160-171220W, translated using codon table 1 (322 amino acids) Uncharacterized ORF; Ortholog(s) have role in asperthecin biosynthetic process	1.78	0.1087	1	1	3	4	322	35.8	5.52
Afu6g01940	Afu6g01940 AspGDID:ASPL0000108649 COORDS:Chr6_A_fumigatus_Af293:282872-284077W, translated using codon table 1 (317 amino acids) Uncharacterized ORF; Dienelactone hydrolase family protein; transcript up-regulated in conidia exposed to neutrophils	5.66	0.1767	1	3	5	5	317	35	8.59
Afu6g02090	Afu6g02090 AspGDID:ASPL0000108664 COORDS:Chr6_A_fumigatus_Af293:353609-352850C, translated using codon table 1 (232 amino acids) Uncharacterized ORF; Ortholog(s) have fungal-type vacuole membrane, vacuolar proton-transporting V-type ATPase, V1 domain localization	0	0.1681	1	1	2	2	232	26.2	8.66
Afu6g02230	glkA AspGDID:ASPL0000108678 COORDS:Chr6_A_fumigatus_Af293:395467-393918C, translated using codon table 1 (493 amino acids) Verified ORF; Putative glucokinase; conidia-enriched protein; transcripts extremely abundant in resting conidia, levels decline during germination; transcript induced by exposure to human airway epithelial cells	2.49	0.2191	1	2	9	9	493	54.4	5.5
Afu6g02280	aspf3 AspGDID:ASPL0000108683 COORDS:Chr6_A_fumigatus_Af293:408478-407732C, translated using codon table 1 (168 amino acids) Verified ORF; Allergen Asp f 3; peroxiredoxin family reductase; putative peroxismal membrane protein; IgE binding; protein induced by heat shock and by exposure to hydrogen peroxide; hypoxia induced protein; induced by gliotoxin exposure	15.26	0.4048	1	4	6	8	168	18.4	5.58
Afu6g02470	Afu6g02470 AspGDID:ASPL0000108702 COORDS:Chr6_A_fumigatus_Af293:466824-464770C, translated using codon table 1 (582 amino acids) Uncharacterized ORF; Putative fumarate hydratase; reacts with rabbit immunosera exposed to A. fumigatus conidia	0	0.2388	1	1	8	9	582	63.1	8.97
Afu6g02720	Afu6g02720 AspGDID:ASPL0000108727 COORDS:Chr6_A_fumigatus_Af293:549426-547997C, translated using codon table 1 (403 amino acids) Uncharacterized ORF; Has domain(s) with predicted catalytic activity, oxidoreductase activity	0	0.139	1	1	3	4	403	43.9	6.05
Afu6g02750	egd1 AspGDID:ASPL0000108730 COORDS:Chr6_A_fumigatus_Af293:559767-558922C, translated using codon table 1 (186 amino acids) Uncharacterized ORF; Nascent polypeptide-associated complex (NAC) subunit beta; protein level decreases upon heat shock	2.22	0.2796	1	1	3	3	186	20.5	5.44
Afu6g02800	Afu6g02800 AspGDID:ASPL0000108735 COORDS:Chr6_A_fumigatus_Af293:570866-570078C, translated using codon table 1 (242 amino acids) Verified ORF; Putative glycosylphosphatidylinositol (GPI)-anchored protein; transcript up-regulated in hyphae upon exposure to neutrophils	2.35	0.1529	1	2	2	3	242	24.6	4.77
Afu6g02910	argEF AspGDID:ASPL0000108747 COORDS:Chr6_A_fumigatus_Af293:603327-600472C, translated using codon table 1 (906 amino acids) Verified ORF; Mitochondrial bifunctional enzyme with N-acetyl-gamma-glutamyl-phosphate reductase and acetylglutamate kinase activity, catalyzes the second and third step in arginine biosynthesis	0	0.2439	1	2	11	11	906	99.4	8.15
Afu6g03730	Afu6g03730 AspGDID:ASPL0000108828 COORDS:Chr6_A_fumigatus_Af293:823850-821958C, translated using codon table 1 (558 amino acids) Uncharacterized ORF; 2-methylcitrate dehydratase; hypoxia repressed protein; transcript up-regulated in conidia exposed to neutrophils and to human airway epithelial cells; no human homolog	0	0.1703	1	2	6	7	558	62.1	8.37
Afu6g03820	egd2 AspGDID:ASPL0000108837 COORDS:Chr6_A_fumigatus_Af293:841323-840546C, translated using codon table 1 (204 amino acids) Uncharacterized ORF; Nascent polypeptide-associated complex subunit alpha; predicted role in 'de novo' cotranslational protein folding; enriched in dormant conidia	6.11	0.2059	1	2	3	3	204	22	4.94
Afu6g03830	Afu6g03830 AspGDID:ASPL0000108838 COORDS:Chr6_A_fumigatus_Af293:842693-842009C, translated using codon table 1 (149 amino acids) Uncharacterized ORF; Ribosomal protein L14	3.5	0.3356	1	2	5	6	149	16.7	10.29
Afu6g04570	Afu6g04570 AspGDID:ASPL0000108911 COORDS:Chr6_A_fumigatus_Af293:1060589-1062452W, translated using codon table 1 (482 amino acids) Uncharacterized ORF; Putative translational elongation factor eEF-1 gamma subunit; protein induced by heat shock; transcript induced by exposure to human airway epithelial cells; snoRNA Afu-328 encoded within intron 2	2.82	0.0581	1	2	2	2	482	54.1	7.64
Afu6g04740	act1 AspGDID:ASPL0000108928 COORDS:Chr6_A_fumigatus_Af293:1114434-1113100C, translated using codon table 1 (393 amino acids) Verified ORF; Actin	2.76	0.1679	1	1	5	6	393	43.9	6.28
Afu6g04920	fdh AspGDID:ASPL0000108946 COORDS:Chr6_A_fumigatus_Af293:1161764-1163212W, translated using codon table 1 (418 amino acids) Verified ORF; Putative NAD-dependent formate dehydrogenase; protein more abundant in conidia than mycelia; transcript up-regulated in conidia exposed to neutrophils; protein induced by heat shock; SrbA-regulated during hypoxia	2.04	0.256	1	4	6	6	418	45.7	8.27
Afu6g04960	Afu6g04960 AspGDID:ASPL0000108950 COORDS:Chr6_A_fumigatus_Af293:1179907-1175883C, translated using codon table 1 (1113 amino acids) Uncharacterized ORF; Ortholog of <i>A. niger CBS 513.88</i> : An15g00360, <i>A. oryzae RIB40</i> : AO090701000042, <i>Neosartorya fischeri NRRL 181</i> : NFIA_051520 and <i>Aspergillus wentii</i> : Aspwe1_0327865	0	0.1447	1	1	7	8	1113	119.7	7.81
Afu6g04970	Afu6g04970 AspGDID:ASPL0000108951 COORDS:Chr6_A_fumigatus_Af293:1181194-1182540W, translated using codon table 1 (428 amino acids) Uncharacterized ORF; Ortholog(s) have O-phospho-L-serine:2-oxoglutarate aminotransferase activity, role in L-serine biosynthetic process, purine nucleobase biosynthetic process and cytosol localization	1.88	0.1869	1	2	7	10	428	46.9	6.81
Afu6g05150	Afu6g05150 AspGDID:ASPL0000108970 COORDS:Chr6_A_fumigatus_Af293:1231600-1234035W, translated using codon table 1 (588 amino acids) Uncharacterized ORF; Ortholog(s) have histone binding, transcription corepressor activity	0	0.1463	1	1	5	5	588	64	6.9
Afu6g05200	Afu6g05200 AspGDID:ASPL0000108975 COORDS:Chr6_A_fumigatus_Af293:1248660-1249485W, translated using codon table 1 (157 amino acids) Uncharacterized ORF; 60S ribosomal protein L28	3.04	0.3631	1	2	4	4	157	17	10.83
Afu6g05210	Afu6g05210 AspGDID:ASPL0000108976 COORDS:Chr6_A_fumigatus_Af293:1250905-1252499W, translated using codon table 1 (330 amino acids) Verified ORF; Putative NAD-dependent malate dehydrogenase with a predicted role in the citric acid cycle; transcript up-regulated in conidia exposed to neutrophils; phoB-regulated; reacts with rabbit immunosera exposed to A. fumigatus conidia	7.37	0.3727	1	6	7	8	330	34.8	7.24
Afu6g06340	gfa1 AspGDID:ASPL0000108994 COORDS:Chr6_A_fumigatus_Af293:1344619-1347035W, translated using codon table 1 (694 amino acids) Uncharacterized ORF; Ortholog(s) have glutamine-fructose-6-phosphate transaminase (isomerizing) activity	1.84	0.1513	1	2	9	9	694	77.2	6.7
Afu6g06750	Afu6g06750 AspGDID:ASPL0000109037 COORDS:Chr6_A_fumigatus_Af293:1474803-1476209W, translated using codon table 1 (272 amino acids) Uncharacterized ORF; 14-3-3 family protein; predicted gene pair with AFUA_2G03290 (artA)	14.11	0.4412	1	4	9	12	272	30.7	4.92
Afu6g06770	aspf22 AspGDID:ASPL0000109039 COORDS:Chr6_A_fumigatus_Af293:1480347-1478847C, translated using codon table 1 (438 amino acids) Verified ORF; Putative enolase; allergen Asp f 22; conidia-enriched protein; transcript induced by growth on hydrogen peroxide; hypoxia induced protein; transcript induced by exposure to human airway epithelial cells	40.46	0.5023	1	12	14	19	438	47.3	5.58
Afu6g06870	Afu6g06870 AspGDID:ASPL0000109049 COORDS:Chr6_A_fumigatus_Af293:1514458-1511030C, translated using codon table 1 (523 amino acids) Uncharacterized ORF; Ortholog(s) have magnesium ion binding, protein serine/threonine kinase activity	2.34	0.1663	1	1	5	5	523	58.7	9.6
Afu6g06900	rho1 AspGDID:ASPL0000109052 COORDS:Chr6_A_fumigatus_Af293:1523942-1524891W, translated using codon table 1 (193 amino acids) Verified ORF; Putative Rho-type GTPase; predominantly localize to the hyphal tip; involved in radial growth and conidiation; mutants display cytoplasmic leakage at the hyphal tips	0	0.1451	1	2	2	2	193	21.7	6.77
Afu6g07420	Afu6g07420 AspGDID:ASPL0000109104 COORDS:Chr6_A_fumigatus_Af293:1673498-1674942W, translated using codon table 1 (461 amino acids) Uncharacterized ORF; Ortholog of <i>A. nidulans FGSC A4</i> : AN5209, <i>A. niger CBS 513.88</i> : An07g09010, <i>A. oryzae RIB40</i> : AO090005001558, <i>Aspergillus wentii</i> : Aspwe1_0516548 and <i>Aspergillus sydowii</i> : Aspsy1_0156708	1.6	0.1106	1	1	3	3	461	52.4	5.86
Afu6g07430	Afu6g07430 AspGDID:ASPL0000109105 COORDS:Chr6_A_fumigatus_Af293:1677465-1679554W, translated using codon table 1 (527 amino acids) Uncharacterized ORF; Putative pyruvate kinase; reacts with rabbit immunosera exposed to A. fumigatus conidia	0	0.2296	1	2	11	11	527	58.3	7.03
Afu6g07640	Afu6g07640 AspGDID:ASPL0000109124 COORDS:Chr6_A_fumigatus_Af293:1735592-1737557W, translated using codon table 1 (604 amino acids) Uncharacterized ORF; Has domain(s) with predicted ATP binding, aminoacyl-tRNA ligase activity, lysine-tRNA ligase activity, nucleic acid binding activity, role in lysyl-tRNA aminoacylation, tRNA aminoacylation for protein translation and cytoplasm localization	0	0.106	1	1	4	4	604	68.9	6.06
Afu6g07760	Afu6g07760 AspGDID:ASPL0000109136 COORDS:Chr6_A_fumigatus_Af293:1770437-1772048W, translated using codon table 1 (492 amino acids) Uncharacterized ORF; Ortholog(s) have structural molecule activity	0	0.2459	1	1	5	5	492	54.5	6.49
Afu6g07770	Afu6g07770 AspGDID:ASPL0000109137 COORDS:Chr6_A_fumigatus_Af293:1773673-1775224W, translated using codon table 1 (501 amino acids) Uncharacterized ORF; Putative alanine aminotransferase	4.47	0.1617	1	3	5	5	501	55.1	5.96
Afu6g07910	Afu6g07910 AspGDID:ASPL0000109151 COORDS:Chr6_A_fumigatus_Af293:1832003-1833789W, translated using codon table 1 (538 amino acids) Uncharacterized ORF; PH domain protein; transcript induced by exposure to human airway epithelial cells	0	0.0409	1	1	2	3	538	58.2	7.01
Afu6g08050	gnd1 AspGDID:ASPL0000109165 COORDS:Chr6_A_fumigatus_Af293:1868427-1870349W, translated using codon table 1 (491 amino acids) Verified ORF; 6-phosphogluconate dehydrogenase; conidia-enriched protein; protein induced by heat shock; reacts with rabbit immunosera exposed to conidia; hypoxia-induced protein; transcript induced by exposure to human airway epithelial cells	22.33	0.4236	1	12	14	18	491	54.1	5.94
Afu6g08360	Afu6g08360 AspGDID:ASPL0000109193 COORDS:Chr6_A_fumigatus_Af293:1958167-1959214W, translated using codon table 1 (332 amino acids) Uncharacterized ORF; Thiazole biosynthesis enzyme; hypoxia induced protein; induced by gliotoxin exposure	8.54	0.2289	1	3	4	6	332	35.5	5.85
Afu6g08660	Afu6g08660 AspGDID:ASPL0000109222 COORDS:Chr6_A_fumigatus_Af293:2052348-2048629C, translated using codon table 1 (1239 amino acids) Uncharacterized ORF; Ortholog of <i>A. nidulans</i> AN3906; hypoxia repressed protein	0	0.1453	1	1	9	9	1239	131.8	5.1
Afu6g08680	Afu6g08680 AspGDID:ASPL0000109224 COORDS:Chr6_A_fumigatus_Af293:2056031-2057547W, translated using codon table 1 (489 amino acids) Uncharacterized ORF; Ortholog(s) have cytosol, nucleus localization	0	0.0838	1	1	2	2	489	52.8	6.7
Afu6g08720	Afu6g08720 AspGDID:ASPL0000109228 COORDS:Chr6_A_fumigatus_Af293:2067644-2066477C, translated using codon table 1 (342 amino acids) Uncharacterized ORF; Putative 5'-methylthioadenosine phosphorylase; transcript induced by exposure to human airway epithelial cells	1.85	0.193	1	2	4	4	342	37.6	7.39
Afu6g08920	Afu6g08920 AspGDID:ASPL0000109248 COORDS:Chr6_A_fumigatus_Af293:2125824-2122684C, translated using codon table 1 (1046 amino acids) Uncharacterized ORF; Assimilatory sulfite reductase	0	0.087	1	1	6	6	1046	114.5	5.14
Afu6g09070	Afu6g09070 AspGDID:ASPL0000109262 COORDS:Chr6_A_fumigatus_Af293:2156209-2154962C, translated using codon table 1 (415 amino acids) Uncharacterized ORF; 3'(2'),5';-bisphosphate nucleotidase; hypoxia repressed protein; predicted essential gene	0	0.0795	1	1	2	2	415	44.1	5.83
Afu6g09140	Afu6g09140 AspGDID:ASPL0000109269 COORDS:Chr6_A_fumigatus_Af293:2170604-2169605C, translated using codon table 1 (291 amino acids) Uncharacterized ORF; Has domain(s) with predicted oxidoreductase activity and role in metabolic process	0	0.0859	1	2	2	2	291	31.2	5.47
Afu6g09920	Afu6g09920 AspGDID:ASPL0000109348 COORDS:Chr6_A_fumigatus_Af293:2439681-2441534W, translated using codon table 1 (617 amino acids) Uncharacterized ORF; Ortholog of <i>A. nidulans FGSC A4</i> : AN10946, <i>A. niger CBS 513.88</i> : An11g07970, <i>A. oryzae RIB40</i> : AO090001000626, <i>Neosartorya fischeri NRRL 181</i> : NFIA_055650 and <i>Aspergillus wentii</i> : Aspwe1_0045804	2.16	0.0924	1	1	4	4	617	65.3	9.57
Afu6g10260	akr1 AspGDID:ASPL0000109382 COORDS:Chr6_A_fumigatus_Af293:2540226-2538892C, translated using codon table 1 (334 amino acids) Verified ORF; Putative aldehyde reductase; abundant protein in conidia; transcript up-regulated in conidia exposed to neutrophils and to human airway epithelial cells	9.37	0.497	1	9	11	11	334	37.2	6.47
Afu6g10340	Afu6g10340 AspGDID:ASPL0000109389 COORDS:Chr6_A_fumigatus_Af293:2554776-2556800W, translated using codon table 1 (674 amino acids) Uncharacterized ORF; Ortholog of <i>A. nidulans FGSC A4</i> : AN2467, <i>A. niger CBS 513.88</i> : An11g01080, <i>A. oryzae RIB40</i> : AO090023000250, <i>Aspergillus wentii</i> : Aspwe1_0059095 and <i>Aspergillus sydowii</i> : Aspsy1_0125009	0	0.0816	1	1	4	4	674	72.9	9.17
Afu6g10650	Afu6g10650 AspGDID:ASPL0000109420 COORDS:Chr6_A_fumigatus_Af293:2633292-2631089C, translated using codon table 1 (657 amino acids) Uncharacterized ORF; Putative ATP citrate lyase, subunit 1; protein induced by heat shock	14.72	0.3379	1	6	13	15	657	71.9	8.48
Afu6g10660	Afu6g10660 AspGDID:ASPL0000109421 COORDS:Chr6_A_fumigatus_Af293:2635628-2637150W, translated using codon table 1 (486 amino acids) Uncharacterized ORF; Putative ATP citrate lyase subunit; repressed by gliotoxin exposure22405895	9.68	0.1975	1	6	8	8	486	52.9	6.27
Afu6g10830	pphB AspGDID:ASPL0000109438 COORDS:Chr6_A_fumigatus_Af293:2675009-2673676C, translated using codon table 1 (329 amino acids) Uncharacterized ORF; Ortholog(s) have protein serine/threonine phosphatase activity	2.92	0.1793	1	1	3	5	329	37.7	5.06
Afu6g11160	idi1 AspGDID:ASPL0000109466 COORDS:Chr6_A_fumigatus_Af293:2753055-2752098C, translated using codon table 1 (279 amino acids) Uncharacterized ORF; Isopentenyl diphosphate isomerase; SrbA-regulated during hypoxia	0	0.1792	1	1	4	4	279	31.6	5.05
Afu6g11390	gel2 AspGDID:ASPL0000109488 COORDS:Chr6_A_fumigatus_Af293:2823792-2825489W, translated using codon table 1 (475 amino acids) Verified ORF; GPI-anchored 1,3-beta-glucanosyltransferase; role in conidiogenesis, cell wall composition, fungal burden in a mouse pulmonary infection; constitutively expressed during hyphal growth; hypoxia induced protein; repressed by artemisinin	0	0.2168	1	3	8	8	475	51.7	4.82
Afu6g11430	aldA AspGDID:ASPL0000109492 COORDS:Chr6_A_fumigatus_Af293:2837140-2839051W, translated using codon table 1 (559 amino acids) Verified ORF; Putative aldehyde dehydrogenase; predicted gene pair with AFUA_7G01000; hypoxia repressed protein; transcript up-regulated in conidia exposed to neutrophils; immunoreactive protein	15.46	0.2522	2	7	10	11	559	60.9	6.73
Afu6g11850	Afu6g11850 AspGDID:ASPL0000109531 COORDS:Chr6_A_fumigatus_Af293:2961275-2962537W, translated using codon table 1 (397 amino acids) Uncharacterized ORF; Protein of unknown function; hypoxia induced protein	12.96	0.1486	1	6	6	8	397	44.2	8.48
Afu6g11890	Afu6g11890 AspGDID:ASPL0000109535 COORDS:Chr6_A_fumigatus_Af293:2972392-2969433C, translated using codon table 1 (930 amino acids) Uncharacterized ORF; Putative dynamin GTPase	0	0.0613	1	1	4	4	930	104.3	6.83
Afu6g12050	nrps11 AspGDID:ASPL0000109550 COORDS:Chr6_A_fumigatus_Af293:3013593-3017507W, translated using codon table 1 (1160 amino acids) Verified ORF; Putative non-ribosomal peptide synthetase (NRPS); member of the fumiquinazoline biosynthetic cluster; essential for fumigaclavine C biosynthesis; transcript downregulated in response to voriconazole	0	0.0836	1	1	4	5	1160	128.7	6.05
Afu6g12170	fkbp1 AspGDID:ASPL0000109562 COORDS:Chr6_A_fumigatus_Af293:3060448-3061084W, translated using codon table 1 (112 amino acids) Uncharacterized ORF; Putative FK506-binding protein (FKBP)-type peptidyl-prolyl cis-trans isomerase; transcript induced by exposure to human airway epithelial cells	7.32	0.2946	1	3	3	3	112	12.1	7.25
Afu6g12300	Afu6g12300 AspGDID:ASPL0000109574 COORDS:Chr6_A_fumigatus_Af293:3095007-3092936C, translated using codon table 1 (478 amino acids) Verified ORF; RNP domain protein; conidia-enriched protein	2	0.1611	1	2	6	7	478	51.7	9.55
Afu6g12500	Afu6g12500 AspGDID:ASPL0000109594 COORDS:Chr6_A_fumigatus_Af293:3156604-3155495C, translated using codon table 1 (220 amino acids) Uncharacterized ORF; Ortholog(s) have cytosol, mitochondrion, nucleus localization	2.04	0.2091	1	2	3	4	220	23.7	8.38
Afu6g12740	Afu6g12740 AspGDID:ASPL0000109617 COORDS:Chr6_A_fumigatus_Af293:3219940-3220875W, translated using codon table 1 (245 amino acids) Uncharacterized ORF; Dienelactone hydrolase family protein	0	0.3143	1	1	7	7	245	26.9	6.64
Afu6g12930	acoA AspGDID:ASPL0000109636 COORDS:Chr6_A_fumigatus_Af293:3262693-3265559W, translated using codon table 1 (787 amino acids) Verified ORF; Mitochondrial aconitate hydratase; citric acid cycle enzyme; protein abundant in conidia; transcript induced in conidia exposed to neutrophils; reacts with rabbit immunosera exposed to A. fumigatus conidia; hypoxia induced	12.23	0.371	1	12	21	21	787	85.5	6.71
Afu6g12990	Afu6g12990 AspGDID:ASPL0000109642 COORDS:Chr6_A_fumigatus_Af293:3280512-3279334C, translated using codon table 1 (263 amino acids) Uncharacterized ORF; Putative cytosolic large ribosomal subunit protein L7A	7.27	0.3156	1	3	8	9	263	29.4	10.26
Afu6g13180	Afu6g13180 AspGDID:ASPL0000109660 COORDS:Chr6_A_fumigatus_Af293:3331957-3330174C, translated using codon table 1 (574 amino acids) Uncharacterized ORF; Has domain(s) with predicted deaminase activity and role in purine ribonucleoside monophosphate biosynthetic process	0	0.1551	1	1	5	5	574	65.7	5.5
Afu6g13250	Afu6g13250 AspGDID:ASPL0000109666 COORDS:Chr6_A_fumigatus_Af293:3354774-3355600W, translated using codon table 1 (123 amino acids) Uncharacterized ORF; 60S ribosomal protein L31e; transcript induced by exposure to human airway epithelial cells	2.43	0.1951	1	1	2	2	123	14	10.49
Afu6g13300	Afu6g13300 AspGDID:ASPL0000109671 COORDS:Chr6_A_fumigatus_Af293:3377042-3376007C, translated using codon table 1 (215 amino acids) Uncharacterized ORF; GTP-Binding nuclear protein Ran	8.21	0.2977	1	3	6	7	215	24.1	7.39
Afu6g13540	cp3 AspGDID:ASPL0000109695 COORDS:Chr6_A_fumigatus_Af293:3447061-3448745W, translated using codon table 1 (543 amino acids) Uncharacterized ORF; Carboxypeptidase Y; predicted signal sequence for secretion; transcript up-regulated in conidia exposed to neutrophils; induced by growth on BSA as a sole nitrogen source	0	0.1197	1	1	5	5	543	60.9	5.8
Afu6g13550	Afu6g13550 AspGDID:ASPL0000109696 COORDS:Chr6_A_fumigatus_Af293:3450087-3449278C, translated using codon table 1 (155 amino acids) Uncharacterized ORF; Ribosomal protein S13p/S18e	5.94	0.2129	1	4	4	4	155	17.9	10.45
Afu7g00130	nscR AspGDID:ASPL0000109813 COORDS:Chr7_A_fumigatus_Af293:31892-29421C, translated using codon table 1 (774 amino acids) Verified ORF; Pathway-specific Zn(II)2Cys6 transcriptional factor; encoded within the nsc/fcc secondary metabolite gene cluster; role in neosartoricin and fumicycline A biosynthesis; induced by contact with the bacterium Streptomyces rapamycinicus	0	0.1886	1	1	10	10	774	85.7	7.02
Afu7g00350	Afu7g00350 AspGDID:ASPL0000109834 COORDS:Chr7_A_fumigatus_Af293:99535-100896W, translated using codon table 1 (453 amino acids) Uncharacterized ORF; Putative NAD-dependent dehydrogenase; protein induced by hydrogen peroxide; transcript up-regulated in conidia exposed to neutrophils	0	0.2759	1	1	6	7	453	49.6	9.17
Afu7g00580	Afu7g00580 AspGDID:ASPL0000109856 COORDS:Chr7_A_fumigatus_Af293:161799-161098C, translated using codon table 1 (233 amino acids) Uncharacterized ORF; Putative adhesin; expression induced in biofilm	0	0.2189	1	1	2	2	233	23.7	4.68
Afu7g01460	Afu7g01460 AspGDID:ASPL0000109941 COORDS:Chr7_A_fumigatus_Af293:380737-379723C, translated using codon table 1 (259 amino acids) Uncharacterized ORF; Ribosomal protein S5	7.8	0.2664	1	5	5	5	259	28.3	10.54
Afu7g01830	ugp1 AspGDID:ASPL0000109978 COORDS:Chr7_A_fumigatus_Af293:488718-487183C, translated using codon table 1 (511 amino acids) Verified ORF; UTP-glucose-1-phosphate uridylyltransferase; induced by hydrogen peroxide; hypoxia repressed protein	12.62	0.2779	1	8	14	16	511	56.9	6.87
Afu7g02070	nfr1 AspGDID:ASPL0000110002 COORDS:Chr7_A_fumigatus_Af293:555550-557341W, translated using codon table 1 (558 amino acids) Verified ORF; AIF-like mitochondrial oxidoreductase; conidia-enriched protein	2.65	0.1971	1	2	8	10	558	59.8	7.65
Afu7g02180	Afu7g02180 AspGDID:ASPL0000110013 COORDS:Chr7_A_fumigatus_Af293:584569-586235W, translated using codon table 1 (509 amino acids) Uncharacterized ORF; Ortholog(s) have UDP-N-acetylglucosamine diphosphorylase activity, role in UDP-N-acetylglucosamine biosynthetic process and cytosol, nucleus localization	0	0.275	1	2	8	10	509	56.7	6.1
Afu7g02230	Afu7g02230 AspGDID:ASPL0000110018 COORDS:Chr7_A_fumigatus_Af293:599410-600851W, translated using codon table 1 (418 amino acids) Uncharacterized ORF; Ortholog(s) have mRNA binding activity, role in arginine catabolic process, positive regulation of cellular response to oxidative stress, positive regulation of nuclear-transcribed mRNA poly(A) tail shortening and cytosol localization	2.45	0.1483	1	1	4	4	418	44.8	5.76
Afu7g02340	Afu7g02340 AspGDID:ASPL0000110029 COORDS:Chr7_A_fumigatus_Af293:635304-636088W, translated using codon table 1 (168 amino acids) Uncharacterized ORF; Ortholog(s) have role in isoleucine biosynthetic process, mitochondrial translation and mitochondrial matrix localization	0	0.1429	1	2	2	2	168	18	8.82
Afu7g02570	Afu7g02570 AspGDID:ASPL0000110052 COORDS:Chr7_A_fumigatus_Af293:707039-704159C, translated using codon table 1 (892 amino acids) Uncharacterized ORF; Ortholog of <i>A. nidulans FGSC A4</i> : AN9067/tinC, AN2167/hetC, <i>A. fumigatus Af293</i> : Afu2g15840, <i>A. niger CBS 513.88</i> : An15g06140 and <i>A. oryzae RIB40</i> : AO090038000633, AO090012000230	0	0.0706	1	1	4	5	892	101.1	5.06
Afu7g03970	Afu7g03970 AspGDID:ASPL0000110092 COORDS:Chr7_A_fumigatus_Af293:892169-892894W, translated using codon table 1 (220 amino acids) Uncharacterized ORF; Ortholog of <i>A. nidulans FGSC A4</i> : AN4260, AN5290, AN1561, AN1493, AN7323, <i>A. fumigatus Af293</i> : Afu7g00970, Afu8g04890 and <i>A. niger CBS 513.88</i> : An16g07920, An01g14810	0	0.0955	1	1	2	2	220	22.7	4.68
Afu7g03980	Afu7g03980 AspGDID:ASPL0000110093 COORDS:Chr7_A_fumigatus_Af293:893752-895260W, translated using codon table 1 (468 amino acids) Uncharacterized ORF; Ortholog(s) have role in translational initiation and cytosol, eukaryotic 43S preinitiation complex, eukaryotic translation initiation factor 3 complex, eIF3m, nucleus localization	0	0.0769	1	1	3	4	468	51.1	5.06
Afu7g04210	Afu7g04210 AspGDID:ASPL0000110116 COORDS:Chr7_A_fumigatus_Af293:951859-952611W, translated using codon table 1 (161 amino acids) Uncharacterized ORF; Putative tropomyosin 1; protein induced by hydrogen peroxide; reacts with rabbit immunosera exposed to A. fumigatus conidia	3.55	0.3478	1	3	5	5	161	18.8	5.03
Afu7g04500	Afu7g04500 AspGDID:ASPL0000110143 COORDS:Chr7_A_fumigatus_Af293:1026112-1027349W, translated using codon table 1 (305 amino acids) Uncharacterized ORF; ATP phosphoribosyltransferase; role in histidine biosynthesis; no human homolog	0	0.177	1	2	5	5	305	32.5	6.14
Afu7g04811	Afu7g04811 AspGDID:ASPL0000361449 COORDS:Chr7_A_fumigatus_Af293:1124259-1126477W, translated using codon table 1 (626 amino acids) Uncharacterized ORF; Has domain(s) with predicted DNA binding, zinc ion binding activity, role in transcription, DNA-templated and nucleus localization	0	0.1917	1	1	6	7	626	69.6	6.15
Afu7g05130	Afu7g05130 AspGDID:ASPL0000110206 COORDS:Chr7_A_fumigatus_Af293:1210999-1212308W, translated using codon table 1 (360 amino acids) Uncharacterized ORF; Putative O-methyltransferase	0	0.1472	1	1	3	3	360	40.6	6.15
Afu7g05290	Afu7g05290 AspGDID:ASPL0000110222 COORDS:Chr7_A_fumigatus_Af293:1257190-1256242C, translated using codon table 1 (151 amino acids) Uncharacterized ORF; Cytosolic small ribosomal subunit S13/S15; transcript repressed by exposure to human airway epithelial cells	8.74	0.4503	1	5	6	9	151	16.8	10.43
Afu7g05430	Afu7g05430 AspGDID:ASPL0000110236 COORDS:Chr7_A_fumigatus_Af293:1307951-1304000C, translated using codon table 1 (1155 amino acids) Uncharacterized ORF; Ortholog(s) have role in mRNA stabilization, nuclear-transcribed mRNA catabolic process, nonsense-mediated decay and cytosol localization	0	0.0745	1	1	8	12	1155	130.9	5.29
Afu7g05510	Afu7g05510 AspGDID:ASPL0000110244 COORDS:Chr7_A_fumigatus_Af293:1330274-1332531W, translated using codon table 1 (686 amino acids) Uncharacterized ORF; Ortholog(s) have DNA binding, DNA translocase activity	1.75	0.1778	1	1	6	6	686	74.6	5.1
Afu7g05660	Afu7g05660 AspGDID:ASPL0000110259 COORDS:Chr7_A_fumigatus_Af293:1376127-1379437W, translated using codon table 1 (1065 amino acids) Uncharacterized ORF; Putative translation elongation factor eEF-3; protein induced by heat shock and hypoxia	6.45	0.2028	1	5	13	14	1065	117.7	6.18
Afu7g05720	Afu7g05720 AspGDID:ASPL0000110264 COORDS:Chr7_A_fumigatus_Af293:1398605-1400277W, translated using codon table 1 (485 amino acids) Uncharacterized ORF; Pyruvate dehydrogenase complex, dihydrolipoamide acetyltransferase component; hypoxia induced protein	13.45	0.2907	1	5	10	11	485	52	6.68
Afu7g05740	Afu7g05740 AspGDID:ASPL0000110266 COORDS:Chr7_A_fumigatus_Af293:1404497-1405787W, translated using codon table 1 (340 amino acids) Verified ORF; Putative NAD-dependent malate dehydrogenase; protein abundant in conidia; immunoreactive; reacts with rabbit immunosera exposed to A. fumigatus conidia; induced by L-tyrosine; transcript downregulated in response to hypoxia	7.65	0.3206	1	5	10	10	340	35.9	9.09
Afu7g05930	mepB AspGDID:ASPL0000110285 COORDS:Chr7_A_fumigatus_Af293:1452895-1455148W, translated using codon table 1 (716 amino acids) Verified ORF; Putative metallopeptidase with similarity to mammalian thimet oligopeptidases; conidia-enriched protein; transcript induced by exposure to human airway epithelial cells and by growth on BSA as a sole nitrogen source	0	0.0754	1	1	4	4	716	81.9	5.78
Afu7g05950	Afu7g05950 AspGDID:ASPL0000110287 COORDS:Chr7_A_fumigatus_Af293:1457344-1456348C, translated using codon table 1 (139 amino acids) Uncharacterized ORF; Ortholog(s) have calcium ion binding activity and role in actomyosin contractile ring assembly actin filament organization, protein localization to medial cortex, regulation of cell cycle, spore germination	3.02	0.3885	2	3	4	4	139	15.4	4.59
Afu7g06610	Afu7g06610 AspGDID:ASPL0000110351 COORDS:Chr7_A_fumigatus_Af293:1610600-1609738C, translated using codon table 1 (237 amino acids) Uncharacterized ORF; Has domain(s) with predicted catalytic activity and role in metabolic process	10.61	0.4852	1	4	7	7	237	25.1	7.24
Afu7g06780	Afu7g06780 AspGDID:ASPL0000110368 COORDS:Chr7_A_fumigatus_Af293:1648499-1649833W, translated using codon table 1 (374 amino acids) Uncharacterized ORF; Has domain(s) with predicted oxidoreductase activity and role in oxidation-reduction process	2.89	0.2433	1	2	5	5	374	41.5	7.43
Afu7g06800	Afu7g06800 AspGDID:ASPL0000110370 COORDS:Chr7_A_fumigatus_Af293:1655732-1653756C, translated using codon table 1 (493 amino acids) Uncharacterized ORF; Has domain(s) with predicted carbon-nitrogen ligase activity, with glutamine as amido-N-donor activity	1.84	0.1826	1	1	5	5	493	53.4	5.88
Afu7g06810	Afu7g06810 AspGDID:ASPL0000110371 COORDS:Chr7_A_fumigatus_Af293:1658865-1656772C, translated using codon table 1 (697 amino acids) Uncharacterized ORF; Has domain(s) with predicted oxidoreductase activity and role in oxidation-reduction process	14.67	0.2339	1	9	13	14	697	78.5	6.51
Afu8g00410	metAP AspGDID:ASPL0000110482 COORDS:Chr8_A_fumigatus_Af293:92235-90299C, translated using codon table 1 (561 amino acids) Verified ORF; Methionine aminopeptidase type II; required for mycotoxin synthesis; induced by growth on BSA as a sole nitrogen source; encoded in the fma (fumagillin) secondary metabolite gene cluster	0	0.205	1	1	6	6	561	62	8.02
Afu8g01580	Afu8g01580 AspGDID:ASPL0000110597 COORDS:Chr8_A_fumigatus_Af293:405654-407154W, translated using codon table 1 (389 amino acids) Uncharacterized ORF; Has domain(s) with predicted catalytic activity, pyridoxal phosphate binding activity and role in biosynthetic process	0	0.0925	1	1	2	2	389	42.9	5.78
Afu8g01670	cat2 AspGDID:ASPL0000110606 COORDS:Chr8_A_fumigatus_Af293:441545-439266C, translated using codon table 1 (759 amino acids) Verified ORF; Putative bifunctional catalase-peroxidase; induction in response to hydrogen peroxide Yap1-dependent; transcript induced by exposure to human airway epithelial cells; SrbA-regulated during hypoxia	0	0.0382	1	2	2	2	759	83.7	6.58
Afu8g02620	Afu8g02620 AspGDID:ASPL0000110698 COORDS:Chr8_A_fumigatus_Af293:695141-693100C, translated using codon table 1 (607 amino acids) Uncharacterized ORF; Ortholog of <i>A. nidulans FGSC A4</i> : AN10344, <i>A. niger CBS 513.88</i> : An03g06730, <i>A. oryzae RIB40</i> : AO090010000752, <i>Neosartorya fischeri NRRL 181</i> : NFIA_096330 and <i>Aspergillus wentii</i> : Aspwe1_0033226	0	0.0478	1	2	3	3	607	68.9	4.65
Afu8g03930	hscA AspGDID:ASPL0000110728 COORDS:Chr8_A_fumigatus_Af293:839316-841607W, translated using codon table 1 (614 amino acids) Verified ORF; Putative Hsp70 chaperone; Yap1-dependent induction in response to hydrogen peroxide; hypoxia induced protein	2.7	0.1808	1	4	7	7	614	66.9	5.39
Afu8g04000	erg10B AspGDID:ASPL0000110735 COORDS:Chr8_A_fumigatus_Af293:855589-857056W, translated using codon table 1 (401 amino acids) Uncharacterized ORF; Putative acetyl-coenzyme A acetyltransferase; protein induced by hydrogen peroxide; higher expression in 48 h biofilm vs planktonic cells; SrbA-regulated during hypoxia	2.51	0.1496	1	1	4	4	401	41.2	6.87
Afu8g05320	Afu8g05320 AspGDID:ASPL0000110862 COORDS:Chr8_A_fumigatus_Af293:1239645-1241741W, translated using codon table 1 (556 amino acids) Verified ORF; Putative mitochondrial F1 ATPase subunit alpha; hypoxia induced protein	8.73	0.1942	1	4	9	9	556	59.9	9.07
Afu8g05560	Afu8g05560 AspGDID:ASPL0000110885 COORDS:Chr8_A_fumigatus_Af293:1298493-1300419W, translated using codon table 1 (471 amino acids) Uncharacterized ORF; Ortholog(s) have protein serine/threonine phosphatase activity	5.51	0.2314	1	1	6	7	471	53.3	6.3
Afu8g05610	btgE AspGDID:ASPL0000110890 COORDS:Chr8_A_fumigatus_Af293:1318148-1320231W, translated using codon table 1 (616 amino acids) Uncharacterized ORF; Putative cell wall glucanase	10.15	0.1396	1	5	7	7	616	63.6	5.64

## Sheet: Wild-type 24 hs_2
Acession	Description	Score	Coverage	# Proteins	#Unique Peptides	#Peptides	#PSMs	#Aas	MW kDa	calc. pI
Afu1g01010	Afu1g01010 AspGDID:ASPL0000101271 COORDS:Chr1_A_fumigatus_Af293:352044-358955W, translated using codon table 1 (2098 amino acids) Uncharacterized ORF; Putative polyketide synthase (PKS), encoded in a predicted secondary metabolite gene cluster	0	0.112	1	1	13	17	2098	231.2	5.8
Afu1g01740	Afu1g01740 AspGDID:ASPL0000101344 COORDS:Chr1_A_fumigatus_Af293:538203-536416C, translated using codon table 1 (531 amino acids) Uncharacterized ORF; Ortholog(s) have unfolded protein binding activity, role in protein folding and chaperonin-containing T-complex, nucleus localization	3.29	0.1846	1	2	6	7	531	57.2	6.21
Afu1g02150	Afu1g02150 AspGDID:ASPL0000101385 COORDS:Chr1_A_fumigatus_Af293:639645-637892C, translated using codon table 1 (519 amino acids) Uncharacterized ORF; Ortholog(s) have glycerol-3-phosphate dehydrogenase [NAD+] activity and role in NADH oxidation, cell-abiotic substrate adhesion, glycerol biosynthetic process, intracellular accumulation of glycerol	0	0.2582	1	3	10	10	519	56.4	8.19
Afu1g02190	rab11 AspGDID:ASPL0000101389 COORDS:Chr1_A_fumigatus_Af293:648599-649525W, translated using codon table 1 (210 amino acids) Uncharacterized ORF; Ras GTPase; hypoxia repressed protein	1.79	0.2524	1	1	4	4	210	23.3	5.68
Afu1g02550	Afu1g02550 AspGDID:ASPL0000101425 COORDS:Chr1_A_fumigatus_Af293:746335-744583C, translated using codon table 1 (448 amino acids) Uncharacterized ORF; Tubulin alpha-1 subunit; gene pair with AFUA_2G14990 (tubulin alpha-2 subunit)	3.75	0.1295	1	2	4	4	448	50	5.1
Afu1g02980	Afu1g02980 AspGDID:ASPL0000101468 COORDS:Chr1_A_fumigatus_Af293:854826-855623W, translated using codon table 1 (265 amino acids) Uncharacterized ORF; Putative 6-phosphogluconolactonase; calcium downregulated	3.57	0.3623	1	2	6	6	265	28.8	6.28
Afu1g04040	ubiA AspGDID:ASPL0000101573 COORDS:Chr1_A_fumigatus_Af293:1157840-1156984C, translated using codon table 1 (142 amino acids) Uncharacterized ORF; Ubiquitin; induction in response to hydrogen peroxide Yap1-dependent	1.75	0.1761	1	1	2	2	142	16.2	9.42
Afu1g04070	Afu1g04070 AspGDID:ASPL0000101576 COORDS:Chr1_A_fumigatus_Af293:1161707-1160930C, translated using codon table 1 (157 amino acids) Uncharacterized ORF; Eukaryotic initiation factor 5A; Yap1-dependent induction in response to hydrogen peroxide	0	0.465	1	1	4	4	157	17.2	5.4
Afu1g04320	Afu1g04320 AspGDID:ASPL0000101600 COORDS:Chr1_A_fumigatus_Af293:1226288-1226942W, translated using codon table 1 (201 amino acids) Uncharacterized ORF; Ribosomal protein S8	3.24	0.1493	1	1	3	3	201	22.8	11.18
Afu1g04530	Afu1g04530 AspGDID:ASPL0000101621 COORDS:Chr1_A_fumigatus_Af293:1282636-1283216W, translated using codon table 1 (148 amino acids) Uncharacterized ORF; Ribosomal L18ae protein family	2.01	0.1149	1	1	2	2	148	17.4	10.7
Afu1g04660	Afu1g04660 AspGDID:ASPL0000101635 COORDS:Chr1_A_fumigatus_Af293:1318902-1317870C, translated using codon table 1 (203 amino acids) Uncharacterized ORF; Ribosomal protein L15	3.88	0.1724	1	3	4	5	203	24.2	11.3
Afu1g04820	Afu1g04820 AspGDID:ASPL0000101651 COORDS:Chr1_A_fumigatus_Af293:1367321-1366072C, translated using codon table 1 (350 amino acids) Uncharacterized ORF; D-xylose reductase	0	0.1886	1	1	5	5	350	39.8	6.55
Afu1g04940	Afu1g04940 AspGDID:ASPL0000101663 COORDS:Chr1_A_fumigatus_Af293:1408563-1409639W, translated using codon table 1 (189 amino acids) Uncharacterized ORF; Ortholog(s) have GTP binding, GTPase activity	2.05	0.2275	1	2	3	3	189	21.4	6.42
Afu1g04950	glcA AspGDID:ASPL0000101664 COORDS:Chr1_A_fumigatus_Af293:1412013-1410732C, translated using codon table 1 (323 amino acids) Uncharacterized ORF; Ortholog(s) have protein serine/threonine phosphatase activity	9.22	0.322	1	6	7	9	323	37.1	5.78
Afu1g05080	Afu1g05080 AspGDID:ASPL0000101677 COORDS:Chr1_A_fumigatus_Af293:1454060-1455134W, translated using codon table 1 (313 amino acids) Uncharacterized ORF; Putative 60S ribosomal protein P0; reacts with rabbit immunosera exposed to A. fumigatus conidia	8.83	0.1693	1	3	4	5	313	33.5	5.21
Afu1g05340	Afu1g05340 AspGDID:ASPL0000101702 COORDS:Chr1_A_fumigatus_Af293:1537487-1538453W, translated using codon table 1 (221 amino acids) Uncharacterized ORF; 40S ribosomal protein S19	2.14	0.267	1	1	5	5	221	24.8	9.54
Afu1g05500	Afu1g05500 AspGDID:ASPL0000101718 COORDS:Chr1_A_fumigatus_Af293:1573104-1573616W, translated using codon table 1 (144 amino acids) Uncharacterized ORF; 40S ribosomal protein S12	2.06	0.2014	1	1	2	2	144	15.7	5.35
Afu1g05630	Afu1g05630 AspGDID:ASPL0000101731 COORDS:Chr1_A_fumigatus_Af293:1617319-1616207C, translated using codon table 1 (266 amino acids) Uncharacterized ORF; 40S ribosomal protein S3	7.38	0.2782	1	3	6	6	266	29.2	9.1
Afu1g05990	Afu1g05990 AspGDID:ASPL0000101768 COORDS:Chr1_A_fumigatus_Af293:1728875-1727904C, translated using codon table 1 (202 amino acids) Uncharacterized ORF; Ribosomal protein L16a	0	0.1733	1	2	4	4	202	23.1	10.51
Afu1g06190	rmtA AspGDID:ASPL0000101787 COORDS:Chr1_A_fumigatus_Af293:1789312-1787900C, translated using codon table 1 (353 amino acids) Uncharacterized ORF; Histone H4 arginine methyltransferase	2.06	0.1983	1	1	5	5	353	40.3	5.27
Afu1g06210	agm1 AspGDID:ASPL0000101789 COORDS:Chr1_A_fumigatus_Af293:1791710-1793700W, translated using codon table 1 (566 amino acids) Verified ORF; N-acetylphosphoglucosamine mutase, involved in chitin biosynthesis; essential	1.9	0.106	1	1	4	4	566	61.5	6.11
Afu1g06340	Afu1g06340 AspGDID:ASPL0000101802 COORDS:Chr1_A_fumigatus_Af293:1821569-1822486W, translated using codon table 1 (186 amino acids) Uncharacterized ORF; Putative 60S ribosomal protein L27	5.74	0.1667	1	3	4	5	186	21.4	10.49
Afu1g06390	tef1 AspGDID:ASPL0000101807 COORDS:Chr1_A_fumigatus_Af293:1831593-1833461W, translated using codon table 1 (494 amino acids) Verified ORF; Putative translation elongation factor EF-1 alpha subunit; protein abundant in conidia; protein induced by heat shock	10.42	0.2227	1	7	9	10	494	53.8	9.1
Afu1g06960	Afu1g06960 AspGDID:ASPL0000101864 COORDS:Chr1_A_fumigatus_Af293:1985804-1987045W, translated using codon table 1 (370 amino acids) Uncharacterized ORF; Putative pyruvate dehydrogenase complex subunit alpha; protein induced by hydrogen peroxide; hypoxia induced protein	8.09	0.3378	1	4	8	10	370	41.5	6.8
Afu1g07130	Afu1g07130 AspGDID:ASPL0000101879 COORDS:Chr1_A_fumigatus_Af293:2022302-2021162C, translated using codon table 1 (271 amino acids) Uncharacterized ORF; Ortholog(s) have mitochondrion localization	0	0.321	1	1	5	5	271	30	6.68
Afu1g07250	Afu1g07250 AspGDID:ASPL0000101892 COORDS:Chr1_A_fumigatus_Af293:2061033-2058605C, translated using codon table 1 (792 amino acids) Uncharacterized ORF; Ortholog(s) have role in microautophagy, polyphosphate metabolic process, protein localization, vacuolar transport, vacuole fusion, non-autophagic	0	0.1503	1	1	8	8	792	90.5	7.06
Afu1g07380	Afu1g07380 AspGDID:ASPL0000101904 COORDS:Chr1_A_fumigatus_Af293:2090929-2084331C, translated using codon table 1 (2126 amino acids) Uncharacterized ORF; Putative NADH-dependent glutamate synthase; transcript induced during conidial germination; transcript up-regulated in conidia exposed to neutrophils; SrbA-regulated during hypoxia	11.52	0.1576	1	7	26	29	2126	234.1	6.39
Afu1g07440	hsp70 AspGDID:ASPL0000101909 COORDS:Chr1_A_fumigatus_Af293:2102587-2104621W, translated using codon table 1 (638 amino acids) Verified ORF; Molecular chaperone; conidia-enriched protein	36.69	0.3777	1	12	20	24	638	69.6	5.17
Afu1g07530	Afu1g07530 AspGDID:ASPL0000101918 COORDS:Chr1_A_fumigatus_Af293:2122230-2121254C, translated using codon table 1 (257 amino acids) Uncharacterized ORF; Ortholog(s) have adenylate kinase activity, role in ADP biosynthetic process, DNA replication initiation and cytosol, mitochondrial intermembrane space, mitochondrial outer membrane, nucleus localization	6.57	0.2879	1	2	5	5	257	28.7	7.88
Afu1g08840	Afu1g08840 AspGDID:ASPL0000101950 COORDS:Chr1_A_fumigatus_Af293:2290909-2291935W, translated using codon table 1 (228 amino acids) Uncharacterized ORF; Ortholog(s) have guanylate kinase activity, role in GMP metabolic process and cytoplasm, nucleus localization	3.86	0.4254	1	1	6	7	228	25.5	7.43
Afu1g08850	aspD AspGDID:ASPL0000101951 COORDS:Chr1_A_fumigatus_Af293:2293812-2292464C, translated using codon table 1 (346 amino acids) Verified ORF; Septin; localizes to long tubular structures within hyphae and to newly formed septa; repressed by exposure to artemisinin	6.07	0.1763	1	3	5	6	346	39.2	7.84
Afu1g09020	Afu1g09020 AspGDID:ASPL0000101968 COORDS:Chr1_A_fumigatus_Af293:2336543-2337699W, translated using codon table 1 (363 amino acids) Uncharacterized ORF; Ortholog(s) have role in poly(A)+ mRNA export from nucleus, regulation of G2/M transition of mitotic cell cycle and nuclear periphery, nuclear pore localization	1.64	0.2011	1	1	3	3	363	39.8	7.71
Afu1g09100	Afu1g09100 AspGDID:ASPL0000101976 COORDS:Chr1_A_fumigatus_Af293:2363153-2364329W, translated using codon table 1 (192 amino acids) Uncharacterized ORF; 60S ribosomal protein L9	5.65	0.2969	1	4	5	5	192	21.8	9.67
Afu1g09130	Afu1g09130 AspGDID:ASPL0000101979 COORDS:Chr1_A_fumigatus_Af293:2372730-2370383C, translated using codon table 1 (725 amino acids) Verified ORF; Protein of unknown function identified by mass spectrometry	0	0.1848	1	1	6	7	725	80.7	8.22
Afu1g09330	Afu1g09330 AspGDID:ASPL0000101999 COORDS:Chr1_A_fumigatus_Af293:2420356-2421522W, translated using codon table 1 (345 amino acids) Uncharacterized ORF; Ortholog(s) have sequence-specific DNA binding activity and role in translational initiation	0	0.1391	1	1	3	3	345	37.2	4.88
Afu1g09480	Afu1g09480 AspGDID:ASPL0000102014 COORDS:Chr1_A_fumigatus_Af293:2449876-2450674W, translated using codon table 1 (200 amino acids) Uncharacterized ORF; Ortholog(s) have protein transporter activity and role in ascospore formation, cellular response to cadmium ion, detoxification of cadmium ion, intracellular protein transport, retrograde transport, endosome to Golgi	2.69	0.215	1	2	3	3	200	22	5.24
Afu1g09560	Afu1g09560 AspGDID:ASPL0000102022 COORDS:Chr1_A_fumigatus_Af293:2471314-2469899C, translated using codon table 1 (400 amino acids) Uncharacterized ORF; Ortholog(s) have role in mRNA processing, microtubule cytoskeleton organization, mitotic sister chromatid segregation and TORC1 complex, TORC2 complex, cytosol, nucleus localization	2.06	0.08	1	1	2	2	400	43.7	6.42
Afu1g09770	Afu1g09770 AspGDID:ASPL0000102043 COORDS:Chr1_A_fumigatus_Af293:2532708-2535258W, translated using codon table 1 (786 amino acids) Uncharacterized ORF; Ortholog of <i>A. nidulans FGSC A4</i> : AN1288, <i>A. niger CBS 513.88</i> : An08g01580, <i>A. oryzae RIB40</i> : AO090012000866, <i>Aspergillus wentii</i> : Aspwe1_0036503 and <i>Aspergillus sydowii</i> : Aspsy1_0025457	2.44	0.1539	1	1	7	8	786	83.7	9.45
Afu1g09800	Afu1g09800 AspGDID:ASPL0000102046 COORDS:Chr1_A_fumigatus_Af293:2543871-2545480W, translated using codon table 1 (394 amino acids) Uncharacterized ORF; Ortholog of S. cerevisiae OLA1; snoRNA Afu-304 encoded within intron 2	0	0.2208	1	2	6	7	394	43.5	7.81
Afu1g09830	Afu1g09830 AspGDID:ASPL0000102049 COORDS:Chr1_A_fumigatus_Af293:2550807-2551983W, translated using codon table 1 (348 amino acids) Uncharacterized ORF; Ortholog(s) have protein complex scaffold activity, role in posttranslational protein targeting to membrane, response to heat and TRC complex, nucleus localization	2.4	0.1379	1	1	3	3	348	36.3	5.02
Afu1g10130	Afu1g10130 AspGDID:ASPL0000102077 COORDS:Chr1_A_fumigatus_Af293:2611841-2610281C, translated using codon table 1 (446 amino acids) Uncharacterized ORF; Putative adenosylhomocysteinase; protein induced by heat shock	28.13	0.296	1	9	11	16	446	48.5	6.21
Afu1g10350	pgkA AspGDID:ASPL0000102099 COORDS:Chr1_A_fumigatus_Af293:2666254-2667669W, translated using codon table 1 (417 amino acids) Verified ORF; Putative phosphoglycerate kinase; reacts with rabbit immunosera exposed to conidia; hypoxia induced protein; transcript up-regulated in conidia exposed to neutrophils; induced by gliotoxin exposure	12.88	0.3141	1	8	12	18	417	44.7	6.74
Afu1g10630	Afu1g10630 AspGDID:ASPL0000102127 COORDS:Chr1_A_fumigatus_Af293:2776408-2774958C, translated using codon table 1 (387 amino acids) Uncharacterized ORF; Putative S-adenosylmethionine synthetase; higher expression in 48 h biofilm vs planktonic cells; hypoxia induced protein	4.96	0.1757	1	4	6	6	387	42.2	6.01
Afu1g11130	Afu1g11130 AspGDID:ASPL0000102176 COORDS:Chr1_A_fumigatus_Af293:2932858-2933809W, translated using codon table 1 (200 amino acids) Uncharacterized ORF; 60S ribosomal protein L6	5.96	0.305	1	3	5	5	200	22.4	10.15
Afu1g11190	Afu1g11190 AspGDID:ASPL0000102182 COORDS:Chr1_A_fumigatus_Af293:2947142-2948249W, translated using codon table 1 (227 amino acids) Verified ORF; Putative eukaryotic translation elongation factor 1 subunit eEF1-beta; reacts with rabbit immunosera exposed to A. fumigatus conidia; induced by gliotoxin exposure	11.91	0.4273	1	6	6	7	227	25.2	4.55
Afu1g11420	Afu1g11420 AspGDID:ASPL0000102205 COORDS:Chr1_A_fumigatus_Af293:3010805-3006406C, translated using codon table 1 (1378 amino acids) Uncharacterized ORF; Ortholog(s) have mRNA 5'-UTR binding, translation repressor activity, nucleic acid binding activity	0	0.0668	1	1	7	7	1378	152.2	7.56
Afu1g11460	bgt1 AspGDID:ASPL0000102209 COORDS:Chr1_A_fumigatus_Af293:3026278-3025167C, translated using codon table 1 (305 amino acids) Verified ORF; Putative 1,3-beta-glucanosyltransferase; induced by exposure to artemisinin	0	0.059	1	1	2	2	305	33.1	5.2
Afu1g11480	Afu1g11480 AspGDID:ASPL0000102211 COORDS:Chr1_A_fumigatus_Af293:3031787-3030921C, translated using codon table 1 (168 amino acids) Uncharacterized ORF; Protein of unknown function; transcript up-regulated in conidia exposed to neutrophils	2.68	0.25	1	1	2	2	168	18.2	5.53
Afu1g11550	Afu1g11550 AspGDID:ASPL0000102219 COORDS:Chr1_A_fumigatus_Af293:3049138-3050658W, translated using codon table 1 (426 amino acids) Uncharacterized ORF; Has domain(s) with predicted kinase activity, transferase activity, transferring phosphorus-containing groups activity and role in glycerophospholipid biosynthetic process	4.51	0.1948	1	7	7	8	426	48.6	5.83
Afu1g11710	Afu1g11710 AspGDID:ASPL0000102235 COORDS:Chr1_A_fumigatus_Af293:3080890-3079981C, translated using codon table 1 (217 amino acids) Uncharacterized ORF; Ribosomal protein L1	5.5	0.3871	1	1	6	7	217	24.2	9.86
Afu1g12170	Afu1g12170 AspGDID:ASPL0000102283 COORDS:Chr1_A_fumigatus_Af293:3214725-3216299W, translated using codon table 1 (440 amino acids) Uncharacterized ORF; Putative translation elongation factor EF-Tu; hypoxia induced protein	2.94	0.2886	1	3	10	11	440	48.3	7.18
Afu1g12400	Afu1g12400 AspGDID:ASPL0000102307 COORDS:Chr1_A_fumigatus_Af293:3272932-3274357W, translated using codon table 1 (369 amino acids) Uncharacterized ORF; Has domain(s) with predicted arylformamidase activity and role in tryptophan catabolic process to kynurenine	0	0.0813	1	1	2	2	369	41.1	5.97
Afu1g12610	hsp88 AspGDID:ASPL0000102329 COORDS:Chr1_A_fumigatus_Af293:3331407-3333764W, translated using codon table 1 (714 amino acids) Uncharacterized ORF; Hsp70 chaperone; conidia-enriched protein; induction in response to hydrogen peroxide Yap1-dependent	9.61	0.2423	1	6	12	12	714	80	5.17
Afu1g12680	Afu1g12680 AspGDID:ASPL0000102336 COORDS:Chr1_A_fumigatus_Af293:3351052-3347476C, translated using codon table 1 (1072 amino acids) Uncharacterized ORF; Ortholog(s) have Rho GTPase activator activity	0	0.0858	1	1	5	6	1072	117.7	6.77
Afu1g12800	Afu1g12800 AspGDID:ASPL0000102348 COORDS:Chr1_A_fumigatus_Af293:3382593-3384187W, translated using codon table 1 (385 amino acids) Uncharacterized ORF; Putative NADPH isocitrate dehydrogenase; transcript induced during conidial germination	2.64	0.2052	1	2	5	5	385	41.7	8.51
Afu1g12840	niiA AspGDID:ASPL0000102352 COORDS:Chr1_A_fumigatus_Af293:3393418-3397198W, translated using codon table 1 (1102 amino acids) Uncharacterized ORF; Putative nitrite reductase; nitrogen-regulated gene, used as a conditional promoter; protein induced by heat shock; transcript downregulated in response to voriconazole	3.94	0.2015	1	5	16	17	1102	123.1	6.62
Afu1g12890	Afu1g12890 AspGDID:ASPL0000102357 COORDS:Chr1_A_fumigatus_Af293:3406505-3407674W, translated using codon table 1 (300 amino acids) Uncharacterized ORF; Putative 60S Ribosomal protein L5	5.18	0.1033	1	2	3	3	300	34.8	8.94
Afu1g12920	glpV AspGDID:ASPL0000102360 COORDS:Chr1_A_fumigatus_Af293:3420644-3417594C, translated using codon table 1 (879 amino acids) Uncharacterized ORF; Putative glycogen phosphorylase; transcript up-regulated in conidia exposed to neutrophils	2.53	0.1058	1	1	7	7	879	100.2	6.04
Afu1g13090	Afu1g13090 AspGDID:ASPL0000102377 COORDS:Chr1_A_fumigatus_Af293:3472871-3470577C, translated using codon table 1 (764 amino acids) Uncharacterized ORF; Ortholog(s) have anthranilate synthase activity, glyceraldehyde-3-phosphate dehydrogenase (NAD+) (phosphorylating) activity, indole-3-glycerol-phosphate synthase activity, phosphoribosylanthranilate isomerase activity	0	0.1924	1	1	9	9	764	82.2	6.34
Afu1g13490	Afu1g13490 AspGDID:ASPL0000102417 COORDS:Chr1_A_fumigatus_Af293:3586808-3588296W, translated using codon table 1 (293 amino acids) Uncharacterized ORF; Putative spermidine synthase; protein induced by hydrogen peroxide	9.21	0.157	1	4	4	4	293	33.4	5.54
Afu1g13500	tktA AspGDID:ASPL0000102418 COORDS:Chr1_A_fumigatus_Af293:3591128-3588583C, translated using codon table 1 (684 amino acids) Verified ORF; Putative transketolase; protein abundant in conidia; protein induced by heat shock and by hydrogen peroxide; reacts with rabbit immunosera exposed to A. fumigatus conidia	27.58	0.2997	1	13	18	21	684	74.8	6.6
Afu1g13710	Afu1g13710 AspGDID:ASPL0000102439 COORDS:Chr1_A_fumigatus_Af293:3650512-3647224C, translated using codon table 1 (1064 amino acids) Uncharacterized ORF; Isoleucyl-tRNA synthetase, cytoplasmic	2.49	0.1805	1	5	14	14	1064	122.3	6.43
Afu1g13780	Afu1g13780 AspGDID:ASPL0000102446 COORDS:Chr1_A_fumigatus_Af293:3681048-3680611C, translated using codon table 1 (103 amino acids) Uncharacterized ORF; Has domain(s) with predicted DNA binding, protein heterodimerization activity, role in DNA-templated transcription, initiation, nucleosome assembly and nucleosome, nucleus localization	2.01	0.233	2	2	3	4	103	11.4	11.36
Afu1g14090	Afu1g14090 AspGDID:ASPL0000102477 COORDS:Chr1_A_fumigatus_Af293:3770057-3768643C, translated using codon table 1 (418 amino acids) Uncharacterized ORF; Ortholog(s) have role in response to nickel cation and cytosol, nucleus localization	0	0.1005	1	2	4	4	418	45.9	6.3
Afu1g14410	rpl17 AspGDID:ASPL0000102509 COORDS:Chr1_A_fumigatus_Af293:3851949-3852806W, translated using codon table 1 (208 amino acids) Uncharacterized ORF; 60S ribosomal protein L17	7.46	0.1971	1	3	4	4	208	23.4	10.98
Afu1g14550	sod3 AspGDID:ASPL0000102522 COORDS:Chr1_A_fumigatus_Af293:3887266-3888013W, translated using codon table 1 (210 amino acids) Verified ORF; Putative manganese superoxide dismutase; allergen Asp f 6; recognized by IgE from allergic patients; expressed only in hyphae; transcript up-regulated in hyphae exposed to neutrophils and to amphotericin B	8.75	0.1048	1	2	2	3	210	23.4	7.74
Afu1g15020	Afu1g15020 AspGDID:ASPL0000102569 COORDS:Chr1_A_fumigatus_Af293:4039457-4040397W, translated using codon table 1 (215 amino acids) Uncharacterized ORF; 40S ribosomal protein S5; reacts with rabbit immunosera exposed to A. fumigatus conidia	4.46	0.214	1	3	4	4	215	23.9	9.22
Afu1g15260	Afu1g15260 AspGDID:ASPL0000102592 COORDS:Chr1_A_fumigatus_Af293:4109152-4107552C, translated using codon table 1 (389 amino acids) Uncharacterized ORF; Ortholog of <i>A. nidulans FGSC A4</i> : AN0860, <i>A. niger CBS 513.88</i> : An01g13370, <i>A. oryzae RIB40</i> : AO090103000449, AO090005001207, <i>Aspergillus wentii</i> : Aspwe1_0111296 and <i>Aspergillus sydowii</i> : Aspsy1_0273264	0	0.2185	1	1	6	6	389	44	5.4
Afu1g15270	Afu1g15270 AspGDID:ASPL0000102593 COORDS:Chr1_A_fumigatus_Af293:4111044-4114037W, translated using codon table 1 (997 amino acids) Uncharacterized ORF; Ortholog(s) have cytosol, nuclear envelope localization	0	0.1143	1	1	8	8	997	111	5.71
Afu1g15450	Afu1g15450 AspGDID:ASPL0000102610 COORDS:Chr1_A_fumigatus_Af293:4172637-4171167C, translated using codon table 1 (424 amino acids) Uncharacterized ORF; Ortholog(s) have adenylosuccinate synthase activity, sulfinylpropanyl adenylate synthase activity	8.18	0.2052	1	4	9	11	424	46.6	6.9
Afu1g15720	Afu1g15720 AspGDID:ASPL0000102635 COORDS:Chr1_A_fumigatus_Af293:4249956-4253073W, translated using codon table 1 (872 amino acids) Uncharacterized ORF; Ortholog(s) have role in cell division and nuclear membrane localization	0	0.0929	1	1	8	10	872	96.2	4.77
Afu1g15730	Afu1g15730 AspGDID:ASPL0000102636 COORDS:Chr1_A_fumigatus_Af293:4254406-4255080W, translated using codon table 1 (130 amino acids) Uncharacterized ORF; 40S ribosomal protein S22	3.41	0.2308	1	1	2	3	130	14.7	9.66
Afu1g16830	Afu1g16830 AspGDID:ASPL0000102748 COORDS:Chr1_A_fumigatus_Af293:4591138-4594754W, translated using codon table 1 (1092 amino acids) Uncharacterized ORF; Ortholog(s) have nucleus, spindle localization	0	0.0879	1	1	8	9	1092	121.8	6.92
Afu1g16840	Afu1g16840 AspGDID:ASPL0000102749 COORDS:Chr1_A_fumigatus_Af293:4595884-4595128C, translated using codon table 1 (179 amino acids) Uncharacterized ORF; TCTP family protein	5.96	0.257	1	2	4	5	179	20.2	4.97
Afu2g00450	Afu2g00450 AspGDID:ASPL0000102876 COORDS:Chr2_A_fumigatus_Af293:98153-96508C, translated using codon table 1 (530 amino acids) Uncharacterized ORF; Putative hexokinase	4.76	0.1679	1	2	7	9	530	58.3	5.9
Afu2g00720	Afu2g00720 AspGDID:ASPL0000102904 COORDS:Chr2_A_fumigatus_Af293:161113-162800W, translated using codon table 1 (492 amino acids) Uncharacterized ORF; Putative aldehyde dehydrogenase (NAD+)	0	0.1362	1	1	4	4	492	51.9	5.81
Afu2g01010	Afu2g01010 AspGDID:ASPL0000102932 COORDS:Chr2_A_fumigatus_Af293:234729-236432W, translated using codon table 1 (534 amino acids) Uncharacterized ORF; Putative myo-inositol-phosphate synthase; transcript up-regulated in conidia exposed to neutrophils	6.7	0.2341	1	3	8	9	534	58.6	6.23
Afu2g01170	gel1 AspGDID:ASPL0000102948 COORDS:Chr2_A_fumigatus_Af293:272509-273928W, translated using codon table 1 (452 amino acids) Verified ORF; 1,3-beta-glucanosyltransferase with a role in elongation of 1,3-beta-glucan chains; glycosylphosphatidylinositol (GPI)-anchored protein; constitutively expressed during hyphal growth; hypoxia induced protein	0	0.073	1	1	2	2	452	48	5.19
Afu2g01210	Afu2g01210 AspGDID:ASPL0000102952 COORDS:Chr2_A_fumigatus_Af293:284424-286208W, translated using codon table 1 (489 amino acids) Uncharacterized ORF; Putative ATP dependent RNA helicase; transcript induced by exposure to human airway epithelial cells	2.1	0.1227	1	2	5	10	489	53.9	5.71
Afu2g01980	Afu2g01980 AspGDID:ASPL0000103028 COORDS:Chr2_A_fumigatus_Af293:496521-493917C, translated using codon table 1 (850 amino acids) Uncharacterized ORF; Has domain(s) with predicted DNA binding, RNA binding activity and role in RNA metabolic process	2.79	0.1329	1	1	8	9	850	95.7	5.85
Afu2g02050	cyp7 AspGDID:ASPL0000103035 COORDS:Chr2_A_fumigatus_Af293:509986-508618C, translated using codon table 1 (373 amino acids) Uncharacterized ORF; Putative peptidyl-prolyl cis-trans isomerase	1.78	0.2332	1	1	4	4	373	41.3	5.99
Afu2g02100	Afu2g02100 AspGDID:ASPL0000103040 COORDS:Chr2_A_fumigatus_Af293:523316-521496C, translated using codon table 1 (513 amino acids) Uncharacterized ORF; Putative dihydrolipoamide dehydrogenase; reacts with rabbit immunosera exposed to A. fumigatus conidia	2.11	0.0819	1	2	5	5	513	54.9	8.18
Afu2g02450	Afu2g02450 AspGDID:ASPL0000103075 COORDS:Chr2_A_fumigatus_Af293:616760-618401W, translated using codon table 1 (530 amino acids) Uncharacterized ORF; Ortholog of <i>A. nidulans FGSC A4</i> : AN10572, <i>A. niger CBS 513.88</i> : An07g06200, <i>A. oryzae RIB40</i> : AO090026000558, <i>Aspergillus wentii</i> : Aspwe1_0353125 and <i>Aspergillus sydowii</i> : Aspsy1_0091260	0	0.0623	1	1	2	3	530	59	7.56
Afu2g03140	Afu2g03140 AspGDID:ASPL0000103143 COORDS:Chr2_A_fumigatus_Af293:823665-822897C, translated using codon table 1 (211 amino acids) Uncharacterized ORF; Ortholog(s) have peptide-methionine (S)-S-oxide reductase activity, role in cellular response to hydrogen peroxide and cytosol, nucleus localization	0	0.1374	1	1	2	2	211	23.6	7.2
Afu2g03290	artA AspGDID:ASPL0000103158 COORDS:Chr2_A_fumigatus_Af293:868250-867203C, translated using codon table 1 (261 amino acids) Verified ORF; 14-3-3 family protein; predicted gene pair with AFUA_6G06750; conidia-enriched protein; protein induced by hydrogen peroxide; reacts with rabbit immunosera exposed to A. fumigatus conidia; hypoxia repressed protein	14.72	0.3908	1	5	8	9	261	29.1	4.84
Afu2g03400	Afu2g03400 AspGDID:ASPL0000103169 COORDS:Chr2_A_fumigatus_Af293:896513-897792W, translated using codon table 1 (335 amino acids) Uncharacterized ORF; Ortholog(s) have ubiquitin-specific protease activity and role in cellular response to drug, mitochondrial fission, peroxisome fission, proteasome-mediated ubiquitin-dependent protein catabolic process, protein deubiquitination	0	0.3373	1	1	6	9	335	37.4	6.2
Afu2g03490	Afu2g03490 AspGDID:ASPL0000103178 COORDS:Chr2_A_fumigatus_Af293:921519-923827W, translated using codon table 1 (645 amino acids) Uncharacterized ORF; Putative calcium/calmodulin-dependent protein kinase; calcium induced; transcript induced by exposure to human airway epithelial cells	0	0.1209	1	1	5	6	645	72.1	6.87
Afu2g03580	Afu2g03580 AspGDID:ASPL0000103185 COORDS:Chr2_A_fumigatus_Af293:953968-955580W, translated using codon table 1 (518 amino acids) Uncharacterized ORF; Ortholog(s) have phenylalanine-tRNA ligase activity, role in phenylalanyl-tRNA aminoacylation and cytosol, phenylalanine-tRNA ligase complex localization	0	0.1409	1	1	4	5	518	58.5	7.44
Afu2g03720	cyp4 AspGDID:ASPL0000103198 COORDS:Chr2_A_fumigatus_Af293:995026-995900W, translated using codon table 1 (205 amino acids) Uncharacterized ORF; Putative cyclophilin; peptidyl-prolyl cis-trans isomerase; allergen Asp f 11; transcript induced by growth on hydrogen peroxide	2.37	0.0976	1	3	3	3	205	22.3	8.57
Afu2g03860	zrfB AspGDID:ASPL0000103212 COORDS:Chr2_A_fumigatus_Af293:1030601-1031662W, translated using codon table 1 (353 amino acids) Verified ORF; Low affinity plasma membrane zinc transporter; induced by zinc depletion, ZafA-dependent; overexpression decreases zinc uptake, heme biosynthesis and triacetylfusarinine C (TAFC) siderophore production; induced in neutrophil-exposed conidia	0	0.0822	1	1	2	2	353	38.6	6.29
Afu2g04310	Afu2g04310 AspGDID:ASPL0000103257 COORDS:Chr2_A_fumigatus_Af293:1189815-1188083C, translated using codon table 1 (416 amino acids) Uncharacterized ORF; Argininosuccinate synthase; hypoxia induced protein	0	0.2236	1	3	6	6	416	46.1	5.48
Afu2g04620	bipA AspGDID:ASPL0000103288 COORDS:Chr2_A_fumigatus_Af293:1260682-1258486C, translated using codon table 1 (672 amino acids) Uncharacterized ORF; Hsp70 chaperone; protein enriched in dormant conidia	0	0.1146	1	2	7	7	672	73.3	5.03
Afu2g04930	Afu2g04930 AspGDID:ASPL0000103318 COORDS:Chr2_A_fumigatus_Af293:1356339-1357111W, translated using codon table 1 (225 amino acids) Verified ORF; Protein of unknown function identified by mass spectrometry	1.95	0.2311	1	1	4	4	225	25.2	6.34
Afu2g05910	hxkA AspGDID:ASPL0000103414 COORDS:Chr2_A_fumigatus_Af293:1662852-1664600W, translated using codon table 1 (490 amino acids) Verified ORF; Putative hexokinase; protein induced by heat shock	3.23	0.2102	1	1	4	4	490	54.2	5.17
Afu2g06150	pdiA AspGDID:ASPL0000103438 COORDS:Chr2_A_fumigatus_Af293:1746610-1744786C, translated using codon table 1 (517 amino acids) Verified ORF; Putative protein disulfide isomerase; conidial surface associated	17.34	0.2282	1	7	10	11	517	56.2	4.7
Afu2g07350	Afu2g07350 AspGDID:ASPL0000103458 COORDS:Chr2_A_fumigatus_Af293:1876933-1878405W, translated using codon table 1 (456 amino acids) Uncharacterized ORF; Ortholog(s) have glutamate-5-semialdehyde dehydrogenase activity, role in proline biosynthetic process and cytosol, nucleus localization	2	0.0504	1	1	2	2	456	48.8	5.95
Afu2g07380	Afu2g07380 AspGDID:ASPL0000103461 COORDS:Chr2_A_fumigatus_Af293:1879464-1878670C, translated using codon table 1 (184 amino acids) Uncharacterized ORF; Ribosomal protein L18	2.65	0.1957	1	2	4	4	184	20.8	11.81
Afu2g07420	sac6 AspGDID:ASPL0000103465 COORDS:Chr2_A_fumigatus_Af293:1889973-1887748C, translated using codon table 1 (646 amino acids) Verified ORF; Putative actin-bundling protein, fimbrin; conidia-enriched protein	10.21	0.209	1	4	9	9	646	72.4	6.13
Afu2g07500	pepP AspGDID:ASPL0000103473 COORDS:Chr2_A_fumigatus_Af293:1922270-1923825W, translated using codon table 1 (468 amino acids) Uncharacterized ORF; Putative prolidase; transcript induced by exposure to human airway epithelial cells; induced by growth on BSA as a sole nitrogen source	2.18	0.1581	1	4	6	6	468	51.9	5.73
Afu2g07810	Afu2g07810 AspGDID:ASPL0000103501 COORDS:Chr2_A_fumigatus_Af293:1998025-1999850W, translated using codon table 1 (537 amino acids) Uncharacterized ORF; Putative cytosolic hydroxymethyltransferase	0	0.1918	1	1	3	4	537	58.8	8.85
Afu2g07970	Afu2g07970 AspGDID:ASPL0000103517 COORDS:Chr2_A_fumigatus_Af293:2047985-2048981W, translated using codon table 1 (191 amino acids) Uncharacterized ORF; 60S ribosomal protein L19	1.84	0.1204	1	1	2	2	191	22.6	11.56
Afu2g09210	Afu2g09210 AspGDID:ASPL0000103639 COORDS:Chr2_A_fumigatus_Af293:2359448-2360452W, translated using codon table 1 (223 amino acids) Uncharacterized ORF; 60S ribosomal protein L10; reacts with rabbit immunosera exposed to A. fumigatus conidia	8.37	0.2422	1	4	7	9	223	25.6	10.32
Afu2g09290	hsp60 AspGDID:ASPL0000103647 COORDS:Chr2_A_fumigatus_Af293:2378663-2376729C, translated using codon table 1 (587 amino acids) Verified ORF; Putative antigenic mitochondrial protein; reacts with rabbit immunosera exposed to A. fumigatus conidia; hypoxia induced protein	12.73	0.293	1	10	12	16	587	61.9	5.64
Afu2g09790	Afu2g09790 AspGDID:ASPL0000103695 COORDS:Chr2_A_fumigatus_Af293:2503042-2501287C, translated using codon table 1 (553 amino acids) Uncharacterized ORF; Putative glucose-6-phosphate isomerase	5.57	0.0868	1	2	4	4	553	61.3	6.35
Afu2g09850	Afu2g09850 AspGDID:ASPL0000103701 COORDS:Chr2_A_fumigatus_Af293:2516744-2518045W, translated using codon table 1 (355 amino acids) Uncharacterized ORF; Putative oxidoreductase, 2-nitropropane dioxygenase family; transcript up-regulated in conidia exposed to neutrophils	2.16	0.169	1	3	5	5	355	37.7	7.02
Afu2g09910	faa4 AspGDID:ASPL0000103707 COORDS:Chr2_A_fumigatus_Af293:2540651-2538322C, translated using codon table 1 (697 amino acids) Uncharacterized ORF; Putative long chain fatty acid CoA ligase; fatty acid activator; hypoxia repressed protein	4.32	0.0875	1	2	5	5	697	76.7	7.31
Afu2g09960	ssc70 AspGDID:ASPL0000103712 COORDS:Chr2_A_fumigatus_Af293:2553995-2551772C, translated using codon table 1 (661 amino acids) Verified ORF; Putative mitochondrial Hsp70 chaperone; reacts with rabbit immunosera exposed to A. fumigatus conidia; hypoxia induced protein	1.7	0.0983	1	2	6	6	661	71.9	6.16
Afu2g10030	Afu2g10030 AspGDID:ASPL0000103718 COORDS:Chr2_A_fumigatus_Af293:2570628-2569665C, translated using codon table 1 (265 amino acids) Uncharacterized ORF; Immunoreactive protein; calcium induced; transcript induced by exposure to human airway epithelial cells; induced by gliotoxin exposure	0	0.117	1	1	3	3	265	28.2	6.37
Afu2g10070	Afu2g10070 AspGDID:ASPL0000103722 COORDS:Chr2_A_fumigatus_Af293:2576586-2580364W, translated using codon table 1 (1175 amino acids) Uncharacterized ORF; Putative carbamoyl-phosphate synthetase, large subunit	0	0.0885	1	2	7	7	1175	129.1	6.21
Afu2g10090	Afu2g10090 AspGDID:ASPL0000103724 COORDS:Chr2_A_fumigatus_Af293:2584422-2583412C, translated using codon table 1 (153 amino acids) Uncharacterized ORF; 40S ribosomal protein S15	10.63	0.1373	1	1	2	3	153	17.7	10.07
Afu2g10100	aspf8 AspGDID:ASPL0000103725 COORDS:Chr2_A_fumigatus_Af293:2585506-2585100C, translated using codon table 1 (111 amino acids) Uncharacterized ORF; Allergen Asp f 8; putative ribosomal protein P2; transcript induced by growth on hydrogen peroxide and menadione	5.66	0.5315	1	2	5	5	111	11.1	4.34
Afu2g10190	Afu2g10190 AspGDID:ASPL0000103734 COORDS:Chr2_A_fumigatus_Af293:2606602-2610099W, translated using codon table 1 (1165 amino acids) Uncharacterized ORF; Ortholog of <i>A. nidulans FGSC A4</i> : AN5988, <i>A. niger CBS 513.88</i> : An16g04790, <i>A. oryzae RIB40</i> : AO090011000617, <i>Aspergillus wentii</i> : Aspwe1_0045131 and <i>Aspergillus sydowii</i> : Aspsy1_0150906	0	0.1193	1	1	7	7	1165	125.7	9.09
Afu2g10300	Afu2g10300 AspGDID:ASPL0000103745 COORDS:Chr2_A_fumigatus_Af293:2636570-2637526W, translated using codon table 1 (198 amino acids) Uncharacterized ORF; 40S ribosomal protein S17	2.16	0.1465	1	1	2	3	198	22.7	9.99
Afu2g10310	Afu2g10310 AspGDID:ASPL0000103746 COORDS:Chr2_A_fumigatus_Af293:2638979-2637999C, translated using codon table 1 (326 amino acids) Uncharacterized ORF; Ortholog of <i>A. nidulans FGSC A4</i> : AN5980, <i>A. niger CBS 513.88</i> : An16g04680, <i>A. oryzae RIB40</i> : AO090011000607, <i>Aspergillus wentii</i> : Aspwe1_0116525 and <i>Aspergillus sydowii</i> : Aspsy1_0045000	0	0.092	1	1	2	2	326	35.7	7.55
Afu2g10380	Afu2g10380 AspGDID:ASPL0000103753 COORDS:Chr2_A_fumigatus_Af293:2657604-2656030C, translated using codon table 1 (476 amino acids) Uncharacterized ORF; Has domain(s) with predicted translation initiation factor activity and eukaryotic translation initiation factor 3 complex localization	6.67	0.2563	1	2	6	6	476	54.7	5.34
Afu2g10610	Afu2g10610 AspGDID:ASPL0000103776 COORDS:Chr2_A_fumigatus_Af293:2715240-2718149W, translated using codon table 1 (855 amino acids) Uncharacterized ORF; Ortholog(s) have ubiquitin binding activity	2.15	0.076	1	1	4	4	855	94.9	5.08
Afu2g10660	mpdA AspGDID:ASPL0000103781 COORDS:Chr2_A_fumigatus_Af293:2727506-2726340C, translated using codon table 1 (388 amino acids) Verified ORF; Putative mannitol-1-phosphate dehydrogenase; conidia-enriched protein; protein induced by heat shock; reacts with rabbit immunosera exposed to conidia; no human homolog	1.67	0.1289	1	3	4	4	388	43	5.9
Afu2g10920	Afu2g10920 AspGDID:ASPL0000103807 COORDS:Chr2_A_fumigatus_Af293:2813917-2812855C, translated using codon table 1 (294 amino acids) Uncharacterized ORF; Putative enoyl-CoA hydratase/isomerase family protein with a predicted role in beta oxidation of fatty acids; transcript up-regulated in conidia exposed to neutrophils	0	0.0646	1	1	2	2	294	31.6	8.56
Afu2g11060	Afu2g11060 AspGDID:ASPL0000103821 COORDS:Chr2_A_fumigatus_Af293:2836626-2837531W, translated using codon table 1 (158 amino acids) Uncharacterized ORF; Putative acylCoA binding family protein	5.81	0.2911	1	2	3	3	158	17.3	6
Afu2g11130	Afu2g11130 AspGDID:ASPL0000103828 COORDS:Chr2_A_fumigatus_Af293:2853503-2851419C, translated using codon table 1 (553 amino acids) Uncharacterized ORF; Has domain(s) with predicted role in regulation of transcription, DNA-templated and nucleus localization	0	0.1031	1	1	4	4	553	60.5	6.54
Afu2g11150	Afu2g11150 AspGDID:ASPL0000103830 COORDS:Chr2_A_fumigatus_Af293:2856083-2857872W, translated using codon table 1 (468 amino acids) Uncharacterized ORF; Putative secretory-pathway GDP dissociation inhibitor; transcript and protein levels increase upon exposure to amphotericin B	4.61	0.1966	1	3	8	8	468	52.2	5.5
Afu2g11260	luA AspGDID:ASPL0000103841 COORDS:Chr2_A_fumigatus_Af293:2894027-2896466W, translated using codon table 1 (777 amino acids) Uncharacterized ORF; Putative 3-isopropylmalate dehydratase with a predicted role in nitrogen metabolism; protein induced by heat shock; SrbA-regulated during hypoxia	2.07	0.1673	1	2	9	11	777	84	5.94
Afu2g11340	Afu2g11340 AspGDID:ASPL0000103849 COORDS:Chr2_A_fumigatus_Af293:2922123-2921251C, translated using codon table 1 (248 amino acids) Uncharacterized ORF; Ortholog(s) have role in intracellular sterol transport and fungal-type vacuole lumen localization	8.85	0.2016	1	4	5	5	248	27.3	5.94
Afu2g11850	rpL3 AspGDID:ASPL0000103899 COORDS:Chr2_A_fumigatus_Af293:3060721-3062260W, translated using codon table 1 (392 amino acids) Uncharacterized ORF; Allergenic ribosomal L3 protein; allergen Asp f 23; transcript induced in response to dibutyryl cyclic AMP	10.21	0.2755	1	5	7	9	392	44.4	10.18
Afu2g11940	ade13 AspGDID:ASPL0000103908 COORDS:Chr2_A_fumigatus_Af293:3080820-3078848C, translated using codon table 1 (483 amino acids) Uncharacterized ORF; Adenylosuccinate lyase; reacts with rabbit immunosera exposed to A. fumigatus conidia	0	0.2754	1	1	10	10	483	54.7	6.55
Afu2g12450	Afu2g12450 AspGDID:ASPL0000103959 COORDS:Chr2_A_fumigatus_Af293:3199555-3200700W, translated using codon table 1 (354 amino acids) Uncharacterized ORF; Putative hydroxymethylglutaryl-CoA lyase; transcript up-regulated in conidia exposed to neutrophils	4.01	0.1554	1	3	4	4	354	37.8	6.8
Afu2g12870	sec17 AspGDID:ASPL0000104000 COORDS:Chr2_A_fumigatus_Af293:3300543-3301681W, translated using codon table 1 (292 amino acids) Uncharacterized ORF; Putative vesicular-fusion protein; transcript induced by exposure to human airway epithelial cells	0	0.226	1	1	4	4	292	32.8	5.49
Afu2g13110	cycA AspGDID:ASPL0000104025 COORDS:Chr2_A_fumigatus_Af293:3368165-3367112C, translated using codon table 1 (235 amino acids) Verified ORF; Cytochrome c; transcript derepressed during iron starvation in hapX mutant; SrbA-regulated during hypoxia; loss of cycA results in increased levels of AoxA activity, delayed germination and reduced growth in normoxia and hypoxia	0	0.2723	1	1	5	6	235	26.3	10.04
Afu2g13240	Afu2g13240 AspGDID:ASPL0000104038 COORDS:Chr2_A_fumigatus_Af293:3402661-3404769W, translated using codon table 1 (506 amino acids) Uncharacterized ORF; Putative V-type ATPase, B subunit; transcript induced by exposure to human airway epithelial cells	0	0.085	1	2	4	5	506	56.4	6
Afu2g13530	Afu2g13530 AspGDID:ASPL0000104068 COORDS:Chr2_A_fumigatus_Af293:3518148-3521066W, translated using codon table 1 (839 amino acids) Verified ORF; Putative translation elongation factor EF-2 subunit; protein abundant in conidia; protein induced by heat shock	43.28	0.3159	1	15	22	26	839	93.1	6.96
Afu2g14210	ilv3 AspGDID:ASPL0000104136 COORDS:Chr2_A_fumigatus_Af293:3721264-3723226W, translated using codon table 1 (606 amino acids) Verified ORF; Putative mitochondrial dihydroxy acid dehydratase; hypoxia induced protein; induced by exposure to human airway epithelial cells; required for virulence	2.84	0.1881	1	2	7	8	606	64.7	7.65
Afu2g14270	Afu2g14270 AspGDID:ASPL0000104142 COORDS:Chr2_A_fumigatus_Af293:3742174-3739906C, translated using codon table 1 (603 amino acids) Uncharacterized ORF; Putative actin-binding protein; hypoxia repressed protein	0	0.1725	1	2	8	8	603	65.9	5.62
Afu2g14960	Afu2g14960 AspGDID:ASPL0000104211 COORDS:Chr2_A_fumigatus_Af293:3942076-3942959W, translated using codon table 1 (271 amino acids) Uncharacterized ORF; Ortholog(s) have RNA polymerase II activating transcription factor binding, disulfide oxidoreductase activity	3.42	0.1882	1	2	4	5	271	28.8	4.91
Afu2g14990	Afu2g14990 AspGDID:ASPL0000104214 COORDS:Chr2_A_fumigatus_Af293:3948734-3946908C, translated using codon table 1 (451 amino acids) Uncharacterized ORF; Tubulin alpha-2 subunit; gene pair with AFUA_1G02550 (tubulin alpha-1 subunit)	4.67	0.2661	1	2	7	8	451	50.4	5.16
Afu2g15180	Afu2g15180 AspGDID:ASPL0000104235 COORDS:Chr2_A_fumigatus_Af293:4023587-4024676W, translated using codon table 1 (335 amino acids) Uncharacterized ORF; Ortholog of <i>A. nidulans FGSC A4</i> : AN7587, <i>A. niger CBS 513.88</i> : An09g03440, <i>A. oryzae RIB40</i> : AO090012000301, <i>Aspergillus wentii</i> : Aspwe1_0054076 and <i>Aspergillus sydowii</i> : Aspsy1_0058595	2.04	0.1313	1	1	2	2	335	35.9	5.22
Afu2g15255	Afu2g15255 AspGDID:ASPL0000421735 COORDS:Chr2_A_fumigatus_Af293:4045747-4043172C, translated using codon table 1 (710 amino acids) Uncharacterized ORF; Has domain(s) with predicted DNA binding, sequence-specific DNA binding RNA polymerase II transcription factor activity, zinc ion binding activity and role in regulation of transcription, DNA-templated, transcription, DNA-templated	0	0.0408	1	1	4	5	710	79.2	7.84
Afu2g15590	Afu2g15590 AspGDID:ASPL0000104276 COORDS:Chr2_A_fumigatus_Af293:4110503-4115286W, translated using codon table 1 (1523 amino acids) Uncharacterized ORF; Putative sulphite reductase	0	0.042	1	1	6	6	1523	167.4	6.02
Afu2g15610	Afu2g15610 AspGDID:ASPL0000104278 COORDS:Chr2_A_fumigatus_Af293:4118041-4122237W, translated using codon table 1 (1375 amino acids) Uncharacterized ORF; Ortholog(s) have DNA-directed RNA polymerase activity, mitochondrial RNA polymerase regulatory region sequence-specific DNA binding activity and role in mitochondrial genome maintenance, transcription from mitochondrial promoter	2.71	0.0785	1	1	8	9	1375	153.1	8.44
Afu2g15680	Afu2g15680 AspGDID:ASPL0000104285 COORDS:Chr2_A_fumigatus_Af293:4143393-4142898C, translated using codon table 1 (111 amino acids) Uncharacterized ORF; Ortholog(s) have TBP-class protein binding, TBP-class protein binding RNA polymerase II transcription factor activity involved in preinitiation complex assembly activity	0	0.2973	1	1	2	2	111	12.6	6.11
Afu2g15760	Afu2g15760 AspGDID:ASPL0000104293 COORDS:Chr2_A_fumigatus_Af293:4162600-4165937W, translated using codon table 1 (1033 amino acids) Uncharacterized ORF; Ortholog(s) have ubiquitin activating enzyme activity, role in mRNA export from nucleus, protein ubiquitination and cytosol, nucleus localization	7.68	0.1384	1	5	12	13	1033	115.1	5.25
Afu2g15940	Afu2g15940 AspGDID:ASPL0000104311 COORDS:Chr2_A_fumigatus_Af293:4216706-4215369C, translated using codon table 1 (445 amino acids) Uncharacterized ORF; Cofactor for methionyl-and glutamyl-tRNA synthetases	0	0.1191	1	1	2	2	445	47.5	6.96
Afu2g16010	Afu2g16010 AspGDID:ASPL0000104318 COORDS:Chr2_A_fumigatus_Af293:4237529-4235525C, translated using codon table 1 (601 amino acids) Uncharacterized ORF; Prolyl-tRNA synthetase	3.63	0.1847	1	3	10	14	601	67	7.17
Afu2g16090	Afu2g16090 AspGDID:ASPL0000104326 COORDS:Chr2_A_fumigatus_Af293:4262510-4260510C, translated using codon table 1 (552 amino acids) Uncharacterized ORF; Karyopherin alpha subunit	5.04	0.25	1	4	11	14	552	60.6	5.07
Afu2g16370	Afu2g16370 AspGDID:ASPL0000104355 COORDS:Chr2_A_fumigatus_Af293:4343499-4342697C, translated using codon table 1 (131 amino acids) Uncharacterized ORF; 60S ribosomal protein L32	0	0.1985	1	3	5	6	131	15	11.27
Afu2g16400	Afu2g16400 AspGDID:ASPL0000104358 COORDS:Chr2_A_fumigatus_Af293:4350318-4348385C, translated using codon table 1 (504 amino acids) Uncharacterized ORF; Translation initiation factor 4B	0	0.1964	1	1	5	6	504	54.2	9.07
Afu2g16520	pld2 AspGDID:ASPL0000104371 COORDS:Chr2_A_fumigatus_Af293:4414595-4411031C, translated using codon table 1 (1101 amino acids) Uncharacterized ORF; Putative phospholipase D; calcium induced; repressed by exposure to artemisinin	2.26	0.1362	1	1	9	11	1101	123.4	6.65
Afu2g16820	Afu2g16820 AspGDID:ASPL0000104401 COORDS:Chr2_A_fumigatus_Af293:4493020-4491357C, translated using codon table 1 (405 amino acids) Uncharacterized ORF; Putative curved DNA-binding protein	0	0.1704	1	1	5	5	405	44	7.74
Afu2g16960	Afu2g16960 AspGDID:ASPL0000104415 COORDS:Chr2_A_fumigatus_Af293:4532279-4534250W, translated using codon table 1 (581 amino acids) Uncharacterized ORF; Has domain(s) with predicted nucleic acid binding activity and nucleus localization	0	0.0861	1	1	4	4	581	66.1	7.03
Afu2g17110	cdc48 AspGDID:ASPL0000104427 COORDS:Chr2_A_fumigatus_Af293:4568058-4570820W, translated using codon table 1 (819 amino acids) Uncharacterized ORF; Putative cell division control protein; protein induced by heat shock	8.56	0.2247	1	7	13	15	819	90.2	5.22
Afu3g00270	bgt2 AspGDID:ASPL0000104548 COORDS:Chr3_A_fumigatus_Af293:57708-56302C, translated using codon table 1 (446 amino acids) Verified ORF; Cell wall glucanase; predicted glycophosphatidylinositol (GPI)-anchor; secreted protein	0	0.0583	1	1	2	3	446	44.6	5.07
Afu3g01580	Afu3g01580 AspGDID:ASPL0000104678 COORDS:Chr3_A_fumigatus_Af293:397771-395356C, translated using codon table 1 (646 amino acids) Uncharacterized ORF; Putative glucose-methanol-choline (GMC) oxidoreductase; protein induced by hydrogen peroxide; hypoxia induced protein; repressed by gliotoxin exposure	4.3	0.1146	1	2	4	4	646	72.1	7.42
Afu3g03060	aspf34 AspGDID:ASPL0000104827 COORDS:Chr3_A_fumigatus_Af293:817842-817221C, translated using codon table 1 (185 amino acids) Uncharacterized ORF; Allergen Asp f 34; putative phiA family cell wall protein; induced calcium; repressed by exposure to artemisinin	0	0.2324	1	1	2	2	185	19.4	5.45
Afu3g03330	Afu3g03330 AspGDID:ASPL0000104852 COORDS:Chr3_A_fumigatus_Af293:891157-889931C, translated using codon table 1 (408 amino acids) Uncharacterized ORF; Has domain(s) with predicted oxidoreductase activity, transferase activity, transferring acyl groups other than amino-acyl groups, zinc ion binding activity and role in oxidation-reduction process	1.77	0.1225	1	1	3	3	408	45.6	8.13
Afu3g04170	Afu3g04170 AspGDID:ASPL0000104933 COORDS:Chr3_A_fumigatus_Af293:1175521-1176878W, translated using codon table 1 (377 amino acids) Uncharacterized ORF; Ortholog(s) have pyruvate dehydrogenase (acetyl-transferring) activity and role in acetyl-CoA biosynthetic process from pyruvate, arginine biosynthetic process, glutamine biosynthetic process	2.64	0.0796	1	1	2	4	377	40.5	7.24
Afu3g05360	Afu3g05360 AspGDID:ASPL0000104952 COORDS:Chr3_A_fumigatus_Af293:1291520-1292443W, translated using codon table 1 (265 amino acids) Uncharacterized ORF; Has domain(s) with predicted DNA binding, protein heterodimerization activity, role in nucleosome assembly and nucleosome, nucleus localization	0	0.0642	2	1	2	2	265	29.8	10.15
Afu3g05370	Afu3g05370 AspGDID:ASPL0000104953 COORDS:Chr3_A_fumigatus_Af293:1293607-1295556W, translated using codon table 1 (461 amino acids) Uncharacterized ORF; Putative dihydrolipoamide succinyltransferase; reacts with rabbit immunosera exposed to A. fumigatus conidia; hypoxia induced protein; transcript induced by exposure to human airway epithelial cells	3.85	0.2386	1	3	8	10	461	50.3	8.88
Afu3g05430	Afu3g05430 AspGDID:ASPL0000104959 COORDS:Chr3_A_fumigatus_Af293:1307445-1305739C, translated using codon table 1 (507 amino acids) Uncharacterized ORF; Ortholog(s) have translation regulator activity, nucleic acid binding activity	1.76	0.2367	1	1	6	6	507	57.1	8.82
Afu3g05450	Afu3g05450 AspGDID:ASPL0000104961 COORDS:Chr3_A_fumigatus_Af293:1314948-1313258C, translated using codon table 1 (478 amino acids) Uncharacterized ORF; Putative glutamate carboxypeptidase	0	0.113	1	2	4	4	478	53	5.72
Afu3g05560	Afu3g05560 AspGDID:ASPL0000104972 COORDS:Chr3_A_fumigatus_Af293:1344618-1347677W, translated using codon table 1 (916 amino acids) Uncharacterized ORF; Ortholog(s) have role in double-strand break repair via nonhomologous end joining, nucleosome disassembly, regulation of sporulation resulting in formation of a cellular spore, transcription elongation from RNA polymerase II promoter	0	0.131	1	1	10	11	916	104.1	6.47
Afu3g05600	Afu3g05600 AspGDID:ASPL0000104976 COORDS:Chr3_A_fumigatus_Af293:1361310-1362104W, translated using codon table 1 (149 amino acids) Uncharacterized ORF; 60S ribosomal protein L27a	10.12	0.3154	1	4	6	7	149	16.8	10.43
Afu3g06030	Afu3g06030 AspGDID:ASPL0000105014 COORDS:Chr3_A_fumigatus_Af293:1483778-1482859C, translated using codon table 1 (147 amino acids) Uncharacterized ORF; Ortholog(s) have ubiquitin binding, ubiquitin-protein transferase activity	7	0.1973	1	2	2	2	147	16.5	6.92
Afu3g06210	Afu3g06210 AspGDID:ASPL0000105032 COORDS:Chr3_A_fumigatus_Af293:1533290-1534337W, translated using codon table 1 (299 amino acids) Uncharacterized ORF; Putative phosphoribosylaminoimidazole-succinocarboxamidesynthase	0	0.204	1	1	6	6	299	33.2	5.74
Afu3g06530	sC AspGDID:ASPL0000105064 COORDS:Chr3_A_fumigatus_Af293:1618981-1616721C, translated using codon table 1 (574 amino acids) Uncharacterized ORF; Putative ATP sulfurylase; sulfate adenylyltransferase; reacts with rabbit immunosera exposed to A. fumigatus conidia; hypoxia repressed protein	8.95	0.1794	1	6	9	11	574	64.3	7.06
Afu3g06610	Afu3g06610 AspGDID:ASPL0000105072 COORDS:Chr3_A_fumigatus_Af293:1639448-1641145W, translated using codon table 1 (508 amino acids) Uncharacterized ORF; Proteasome regulatory particle subunit; transcript induced by exposure to human airway epithelial cells	0	0.2598	1	2	7	7	508	58.4	7.18
Afu3g06640	Afu3g06640 AspGDID:ASPL0000105075 COORDS:Chr3_A_fumigatus_Af293:1644938-1644430C, translated using codon table 1 (82 amino acids) Uncharacterized ORF; Ortholog(s) have structural constituent of ribosome activity	0	0.2073	1	1	2	2	82	8.9	9.26
Afu3g06840	Afu3g06840 AspGDID:ASPL0000105095 COORDS:Chr3_A_fumigatus_Af293:1702997-1704159W, translated using codon table 1 (261 amino acids) Uncharacterized ORF; Putative cytosolic small ribosomal subunit S4	6.95	0.2452	1	5	7	7	261	29.5	10.07
Afu3g06960	Afu3g06960 AspGDID:ASPL0000105107 COORDS:Chr3_A_fumigatus_Af293:1742922-1742198C, translated using codon table 1 (158 amino acids) Uncharacterized ORF; 60S ribosomal protein L21	4.09	0.2468	1	3	4	4	158	18	10.23
Afu3g06970	Afu3g06970 AspGDID:ASPL0000105108 COORDS:Chr3_A_fumigatus_Af293:1743190-1744103W, translated using codon table 1 (193 amino acids) Uncharacterized ORF; 40S ribosomal protein S9; transcript induced by exposure to human airway epithelial cells	4	0.2798	1	2	6	6	193	22.2	10.05
Afu3g07015	aspE AspGDID:ASPL0000105113 COORDS:Chr3_A_fumigatus_Af293:1753399-1755119W, translated using codon table 1 (553 amino acids) Verified ORF; Septin; unique to filamentous fungi; localizes to long tubular structures within hyphae and to newly formed septa	0	0.1284	1	1	7	7	553	61.8	6.76
Afu3g07150	Afu3g07150 AspGDID:ASPL0000105126 COORDS:Chr3_A_fumigatus_Af293:1796444-1794834C, translated using codon table 1 (502 amino acids) Uncharacterized ORF; Putative succinate-semialdehyde dehydrogenase; hypoxia repressed protein	0	0.1494	1	1	5	5	502	54.7	7.23
Afu3g07430	aspf27 AspGDID:ASPL0000105151 COORDS:Chr3_A_fumigatus_Af293:1867882-1867179C, translated using codon table 1 (163 amino acids) Verified ORF; Putative peptidyl-prolyl cis-trans isomerase; cyclophilin; allergen Asp f 27; protein abundant in conidia; Yap1-dependent induction in response to hydrogen peroxide; induced by L-tyrosine	3.15	0.3374	1	1	5	5	163	17.7	7.97
Afu3g07790	Afu3g07790 AspGDID:ASPL0000105183 COORDS:Chr3_A_fumigatus_Af293:1963894-1965412W, translated using codon table 1 (464 amino acids) Uncharacterized ORF; Argininosuccinate lyase; hypoxia induced protein	2.23	0.0948	1	1	3	3	464	51.8	6.28
Afu3g07810	sdh1 AspGDID:ASPL0000105185 COORDS:Chr3_A_fumigatus_Af293:1970306-1968056C, translated using codon table 1 (647 amino acids) Uncharacterized ORF; Succinate dehydrogenase flavoprotein subunit; role in the citric acid cycle; up-regulated in conidia exposed to neutrophils and during conidial germination; hypoxia repressed protein and transcript; induced by exposure to artemisinin	3.65	0.1917	1	3	11	12	647	71.1	6.98
Afu3g07820	Afu3g07820 AspGDID:ASPL0000105186 COORDS:Chr3_A_fumigatus_Af293:1972540-1971051C, translated using codon table 1 (439 amino acids) Uncharacterized ORF; Ortholog(s) have role in positive regulation of RNA polymerase II transcriptional preinitiation complex assembly, positive regulation of protein catabolic process and proteasome regulatory particle assembly, <a href="#GOsection">more</a>	0	0.2984	1	1	9	10	439	48.9	7.66
Afu3g08040	Afu3g08040 AspGDID:ASPL0000105207 COORDS:Chr3_A_fumigatus_Af293:2056232-2056824W, translated using codon table 1 (148 amino acids) Uncharacterized ORF; Ortholog(s) have DNA-directed RNA polymerase activity, role in regulation of cytokinetic cell separation by regulation of transcription from RNA polymerase II promoter, transcription from RNA polymerase II promoter and nucleus localization	0	0.2027	1	1	2	2	148	16.8	5.62
Afu3g08110	Afu3g08110 AspGDID:ASPL0000105214 COORDS:Chr3_A_fumigatus_Af293:2077251-2079098W, translated using codon table 1 (615 amino acids) Uncharacterized ORF; Putative cell wall protein; transcript downregulated in response to amphotericin B and calcium	6.31	0.0829	1	2	3	3	615	60.1	4.55
Afu3g08160	tif1 AspGDID:ASPL0000105219 COORDS:Chr3_A_fumigatus_Af293:2095759-2094223C, translated using codon table 1 (406 amino acids) Verified ORF; Eukaryotic translation initiation factor eIF4A; ATP-dependent RNA helicase; protein induced by heat shock; predicted gene pair with AFUA_5G02410	4.55	0.1133	2	2	5	5	406	45.7	5.19
Afu3g08200	ams1 AspGDID:ASPL0000105223 COORDS:Chr3_A_fumigatus_Af293:2103989-2100561C, translated using codon table 1 (1088 amino acids) Verified ORF; Putative Class IIC alpha-mannosidase with a predicted role in oligosaccharide catabolism and N-glycan processing	9.87	0.2298	1	4	16	18	1088	123.7	6.27
Afu3g08380	ipp1 AspGDID:ASPL0000105241 COORDS:Chr3_A_fumigatus_Af293:2149763-2148296C, translated using codon table 1 (396 amino acids) Uncharacterized ORF; Putative inorganic diphosphatase; reacts with rabbit immunosera exposed to A. fumigatus conidia	14.64	0.2247	1	6	11	12	396	43.6	7.77
Afu3g08460	Afu3g08460 AspGDID:ASPL0000105249 COORDS:Chr3_A_fumigatus_Af293:2169117-2168265C, translated using codon table 1 (109 amino acids) Uncharacterized ORF; 60S ribosomal protein L35Ae	2.27	0.2385	1	2	2	2	109	12.3	11.22
Afu3g08470	Afu3g08470 AspGDID:ASPL0000105250 COORDS:Chr3_A_fumigatus_Af293:2171618-2174019W, translated using codon table 1 (511 amino acids) Verified ORF; Glucose-6-phosphate 1-dehydrogenase	4.15	0.1898	1	3	8	8	511	58.9	7.01
Afu3g08620	Afu3g08620 AspGDID:ASPL0000105264 COORDS:Chr3_A_fumigatus_Af293:2208889-2209789W, translated using codon table 1 (242 amino acids) Uncharacterized ORF; Ortholog(s) have role in negative regulation of Arp2/3 complex-mediated actin nucleation and actin cortical patch, nucleus localization	1.79	0.1942	1	1	3	3	242	26.1	6.95
Afu3g08660	idp1 AspGDID:ASPL0000105268 COORDS:Chr3_A_fumigatus_Af293:2219058-2221293W, translated using codon table 1 (501 amino acids) Uncharacterized ORF; Putative isocitrate dehydrogenase; protein induced by heat shock	4.76	0.1397	1	6	7	8	501	55.7	8.73
Afu3g08840	Afu3g08840 AspGDID:ASPL0000105285 COORDS:Chr3_A_fumigatus_Af293:2262208-2266262W, translated using codon table 1 (1212 amino acids) Uncharacterized ORF; Ortholog(s) have role in hyphal growth, nuclear division and Golgi apparatus, hyphal tip localization	4.57	0.0784	1	1	8	9	1212	135.8	6.28
Afu3g08980	Afu3g08980 AspGDID:ASPL0000105299 COORDS:Chr3_A_fumigatus_Af293:2294770-2296443W, translated using codon table 1 (536 amino acids) Uncharacterized ORF; Ortholog(s) have threonine synthase activity, role in threonine biosynthetic process and cytosol, nucleus localization	6.43	0.1903	1	4	6	6	536	59.2	6.2
Afu3g09280	Afu3g09280 AspGDID:ASPL0000105325 COORDS:Chr3_A_fumigatus_Af293:2354001-2355185W, translated using codon table 1 (308 amino acids) Uncharacterized ORF; Has domain(s) with predicted ribosome binding, translation initiation factor activity, role in regulation of translational initiation and eukaryotic translation initiation factor 3 complex localization	2.07	0.1818	1	1	4	5	308	34.3	5.26
Afu3g09320	Afu3g09320 AspGDID:ASPL0000105330 COORDS:Chr3_A_fumigatus_Af293:2359631-2361249W, translated using codon table 1 (471 amino acids) Uncharacterized ORF; Serine hydroxymethyltransferase; protein level decreases upon heat shock; reacts with rabbit immunosera exposed to A. fumigatus conidia; hypoxia induced protein; SrbA-regulated during hypoxia	4.59	0.1741	1	4	7	7	471	51.8	7.75
Afu3g09590	Afu3g09590 AspGDID:ASPL0000105357 COORDS:Chr3_A_fumigatus_Af293:2440296-2438341C, translated using codon table 1 (540 amino acids) Uncharacterized ORF; Ortholog(s) have role in cellular response to drug and chaperonin-containing T-complex, nucleus localization	0	0.1074	1	1	3	3	540	58.7	6.76
Afu3g09910	Afu3g09910 AspGDID:ASPL0000105389 COORDS:Chr3_A_fumigatus_Af293:2542185-2543380W, translated using codon table 1 (331 amino acids) Uncharacterized ORF; Ortholog(s) have phosphatidylcholine transporter activity and role in Golgi to plasma membrane transport, ascospore formation, mitotic cytokinesis, phospholipid transport, regulation of filamentous growth	0	0.1329	1	1	4	4	331	37.3	5.52
Afu3g10310	Afu3g10310 AspGDID:ASPL0000105429 COORDS:Chr3_A_fumigatus_Af293:2671052-2673496W, translated using codon table 1 (743 amino acids) Uncharacterized ORF; Ortholog(s) have acetolactate synthase activity, flavin adenine dinucleotide binding activity, role in isoleucine biosynthetic process, valine biosynthetic process and acetolactate synthase complex, mitochondrion localization	0	0.1763	1	1	8	12	743	81.5	8.54
Afu3g10680	Afu3g10680 AspGDID:ASPL0000105466 COORDS:Chr3_A_fumigatus_Af293:2766549-2768521W, translated using codon table 1 (573 amino acids) Uncharacterized ORF; Ortholog of <i>A. nidulans FGSC A4</i> : AN4921, <i>A. niger CBS 513.88</i> : An02g06340, <i>A. oryzae RIB40</i> : AO090003000613, <i>Aspergillus wentii</i> : Aspwe1_0360214 and <i>Aspergillus sydowii</i> : Aspsy1_0056501	2.03	0.2007	1	1	10	10	573	64.1	8.12
Afu3g10730	Afu3g10730 AspGDID:ASPL0000105471 COORDS:Chr3_A_fumigatus_Af293:2781133-2780135C, translated using codon table 1 (201 amino acids) Uncharacterized ORF; 40S ribosomal protein S7e	4.55	0.2239	1	2	3	3	201	22.8	10.15
Afu3g11260	Afu3g11260 AspGDID:ASPL0000105524 COORDS:Chr3_A_fumigatus_Af293:2951140-2951715W, translated using codon table 1 (154 amino acids) Uncharacterized ORF; Ubiquitin	6.36	0.2727	2	1	4	5	154	17.7	9.77
Afu3g11350	arsA AspGDID:ASPL0000105533 COORDS:Chr3_A_fumigatus_Af293:2972476-2973613W, translated using codon table 1 (340 amino acids) Uncharacterized ORF; ATPase; proteins are recognized and bound by Get3p then delivered to the ER	0	0.1324	1	1	2	2	340	37.4	5.1
Afu3g11360	Afu3g11360 AspGDID:ASPL0000105534 COORDS:Chr3_A_fumigatus_Af293:2979671-2978196C, translated using codon table 1 (451 amino acids) Uncharacterized ORF; Ortholog(s) have role in ascospore formation, cellular protein localization, cellular response to caffeine and eukaryotic translation initiation factor 3 complex assembly, <a href="#GOsection">more</a>	2.16	0.1397	1	2	5	5	451	51.7	5.35
Afu3g11400	pep2 AspGDID:ASPL0000105538 COORDS:Chr3_A_fumigatus_Af293:2990626-2992029W, translated using codon table 1 (398 amino acids) Verified ORF; Aspartic acid endopeptidase; conidia-enriched protein; conidial surface associated; predicted signal secretion sequence; hypoxia induced protein; transcript up-regulated in conidia exposed to neutrophils and by growth on BSA	0	0.2211	1	3	6	6	398	43.3	5
Afu3g11480	Afu3g11480 AspGDID:ASPL0000105546 COORDS:Chr3_A_fumigatus_Af293:3012552-3013542W, translated using codon table 1 (308 amino acids) Uncharacterized ORF; Putative enoyl-CoA hydratase	0	0.1948	1	1	5	5	308	33	9.26
Afu3g11690	Afu3g11690 AspGDID:ASPL0000105565 COORDS:Chr3_A_fumigatus_Af293:3071255-3069978C, translated using codon table 1 (360 amino acids) Uncharacterized ORF; Putative class II fructose-bisphosphate aldolase; immunoreactive protein; reacts with rabbit immunosera exposed to A. fumigatus conidia; hypoxia induced protein	8.58	0.1778	1	4	6	6	360	39.8	5.85
Afu3g11830	pgmA AspGDID:ASPL0000105579 COORDS:Chr3_A_fumigatus_Af293:3113884-3115685W, translated using codon table 1 (555 amino acids) Uncharacterized ORF; Putative phosphoglucomutase; reacts with rabbit immunosera exposed to A. fumigatus conidia; hypoxia repressed protein; transcript up-regulated in conidia exposed to neutrophils	10.01	0.2649	1	8	12	13	555	60.5	6.76
Afu3g12270	Afu3g12270 AspGDID:ASPL0000105623 COORDS:Chr3_A_fumigatus_Af293:3237221-3238007W, translated using codon table 1 (235 amino acids) Uncharacterized ORF; Putative glutathione peroxidase; peroxiredoxin; transcript upregulated in hyphae exposed to neutrophils	2.19	0.1106	1	2	3	3	235	25.7	9.22
Afu3g12300	Afu3g12300 AspGDID:ASPL0000105626 COORDS:Chr3_A_fumigatus_Af293:3242604-3243283W, translated using codon table 1 (124 amino acids) Uncharacterized ORF; 60S ribosomal protein L22	2.62	0.2097	1	2	2	3	124	14.2	9.41
Afu3g12530	pkhB AspGDID:ASPL0000105649 COORDS:Chr3_A_fumigatus_Af293:3318837-3312900C, translated using codon table 1 (1937 amino acids) Uncharacterized ORF; Putative sensor histidine kinase/response regulator; transcript induced by exposure to human airway epithelial cells	0	0.0965	1	1	12	12	1937	213.4	6.52
Afu3g12690	glfA AspGDID:ASPL0000105665 COORDS:Chr3_A_fumigatus_Af293:3368002-3366055C, translated using codon table 1 (532 amino acids) Verified ORF; Putative UDP-galactopyranose mutase, enzyme in the first step of galactofuranose biosynthesis; mutant unmasks mannan residues on the cell surface, which is thought to contribute to increased cell adhesion	3.57	0.0959	1	2	4	4	532	59.4	6.93
Afu3g13120	Afu3g13120 AspGDID:ASPL0000105707 COORDS:Chr3_A_fumigatus_Af293:3486119-3484963C, translated using codon table 1 (362 amino acids) Uncharacterized ORF; Ortholog(s) have hydroxymethylbilane synthase activity, role in heme biosynthetic process, pathogenesis and cytoplasm, nucleus localization	0	0.0773	1	1	2	2	362	39.7	5.57
Afu3g13320	rps0 AspGDID:ASPL0000105727 COORDS:Chr3_A_fumigatus_Af293:3533778-3534743W, translated using codon table 1 (297 amino acids) Uncharacterized ORF; Putative 40S ribosomal protein S0	5.36	0.1549	1	3	4	4	297	32.1	4.91
Afu3g13480	Afu3g13480 AspGDID:ASPL0000105743 COORDS:Chr3_A_fumigatus_Af293:3565478-3566600W, translated using codon table 1 (308 amino acids) Uncharacterized ORF; Translation initiation factor 2 alpha subunit	1.93	0.0714	1	2	3	9	308	35	5.82
Afu3g13820	Afu3g13820 AspGDID:ASPL0000105775 COORDS:Chr3_A_fumigatus_Af293:3651038-3650223C, translated using codon table 1 (201 amino acids) Uncharacterized ORF; Putative HET-C2 protein; transcript induced by exposure to human airway epithelial cells	5.16	0.2189	1	2	3	4	201	22.2	6.95
Afu3g14320	Afu3g14320 AspGDID:ASPL0000105822 COORDS:Chr3_A_fumigatus_Af293:3801857-3804177W, translated using codon table 1 (712 amino acids) Uncharacterized ORF; Ortholog(s) have cytosol localization	0	0.0688	1	1	5	7	712	77.9	5.87
Afu3g14490	Afu3g14490 AspGDID:ASPL0000105838 COORDS:Chr3_A_fumigatus_Af293:3844977-3843396C, translated using codon table 1 (508 amino acids) Uncharacterized ORF; Putative ketol acid reductoisomerase; transcript induced by exposure to human airway epithelial cells; no human homolog	11.59	0.1516	1	6	7	7	508	56.3	9.29
Afu3g14680	plb3 AspGDID:ASPL0000105858 COORDS:Chr3_A_fumigatus_Af293:3893246-3895138W, translated using codon table 1 (630 amino acids) Uncharacterized ORF; Putative secreted lysophospholipase B; transcript induced by lecithin and by voriconazole; hypoxia induced protein; induced by exposure to artemisinin	0	0.0794	1	2	4	4	630	67.4	5.66
Afu3g15220	Afu3g15220 AspGDID:ASPL0000105912 COORDS:Chr3_A_fumigatus_Af293:4002781-4004022W, translated using codon table 1 (397 amino acids) Uncharacterized ORF; Ortholog of <i>A. nidulans FGSC A4</i> : AN7282, AN12169, <i>A. fumigatus Af293</i> : Afu1g00750, Afu5g14880, Afu6g11540, Afu8g05975 and <i>A. niger CBS 513.88</i> : An02g04650, An04g08640, An14g02500, An12g01680	0	0.0932	1	1	3	3	397	45.3	4.86
Afu4g00530	Afu4g00530 AspGDID:ASPL0000105972 COORDS:Chr4_A_fumigatus_Af293:148802-139243C, translated using codon table 1 (3169 amino acids) Uncharacterized ORF; Ortholog of <i>A. nidulans FGSC A4</i> : AN9200, AN7637, <i>A. niger CBS 513.88</i> : An08g11390, An08g08230, An08g12160 and <i>Aspergillus wentii</i> : Aspwe1_0060194, Aspwe1_0120922	0	0.1051	1	1	23	25	3169	360	6.93
Afu4g02790	Afu4g02790 AspGDID:ASPL0000106098 COORDS:Chr4_A_fumigatus_Af293:775158-774079C, translated using codon table 1 (310 amino acids) Uncharacterized ORF; Has domain(s) with predicted hydrolase activity, acting on carbon-nitrogen (but not peptide) bonds activity and role in nitrogen compound metabolic process	2.37	0.1613	1	3	4	5	310	33.8	7.42
Afu4g03050	pfy1 AspGDID:ASPL0000106123 COORDS:Chr4_A_fumigatus_Af293:854319-853521C, translated using codon table 1 (131 amino acids) Uncharacterized ORF; Profilin	4.82	0.3359	1	1	2	2	131	13.9	5.48
Afu4g03322	Afu4g03322 AspGDID:ASPL0000365151 COORDS:Chr4_A_fumigatus_Af293:944673-943800C, translated using codon table 1 (257 amino acids) Uncharacterized ORF; Ortholog of <i>A. nidulans FGSC A4</i> : AN7177, <i>A. niger CBS 513.88</i> : An14g01990, <i>A. oryzae RIB40</i> : AO090011000139, <i>Aspergillus sydowii</i> : Aspsy1_0052594 and <i>Aspergillus terreus NIH2624</i> : ATET_02136	2.16	0.1362	1	2	3	3	257	28.9	4.87
Afu4g03410	fhpA AspGDID:ASPL0000106160 COORDS:Chr4_A_fumigatus_Af293:972646-973887W, translated using codon table 1 (413 amino acids) Uncharacterized ORF; Putative flavohemoprotein; protein induced by heat shock and hypoxia	2.72	0.0557	1	1	2	2	413	45.6	6.14
Afu4g03860	nip1 AspGDID:ASPL0000106205 COORDS:Chr4_A_fumigatus_Af293:1086172-1088854W, translated using codon table 1 (862 amino acids) Uncharacterized ORF; Eukaryotic translation initiation factor 3 subunit C	2	0.0719	1	1	5	5	862	97.4	5.14
Afu4g03880	Afu4g03880 AspGDID:ASPL0000106207 COORDS:Chr4_A_fumigatus_Af293:1090760-1092367W, translated using codon table 1 (251 amino acids) Uncharacterized ORF; 60S ribosomal protein L7	12.87	0.3426	1	5	9	10	251	29	10.04
Afu4g03930	Afu4g03930 AspGDID:ASPL0000106212 COORDS:Chr4_A_fumigatus_Af293:1103790-1105475W, translated using codon table 1 (526 amino acids) Uncharacterized ORF; Putative cysteine synthase B; transcript induced by exposure to human airway epithelial cells	18.69	0.2262	1	6	10	16	526	58.3	6.33
Afu4g04210	lap1 AspGDID:ASPL0000106239 COORDS:Chr4_A_fumigatus_Af293:1184726-1183429C, translated using codon table 1 (388 amino acids) Uncharacterized ORF; Putative secreted aminopeptidase; predicted signal sequence for secretion	0	0.0747	1	1	2	2	388	43.1	6.15
Afu4g04318	Afu4g04318 AspGDID:ASPL0000366886 COORDS:Chr4_A_fumigatus_Af293:1217563-1217111C, translated using codon table 1 (111 amino acids) Uncharacterized ORF; Ortholog of <i>A. nidulans FGSC A4</i> : AN7011, <i>A. niger CBS 513.88</i> : An14g00530, <i>Aspergillus wentii</i> : Aspwe1_0053203, <i>Aspergillus sydowii</i> : Aspsy1_0184132 and <i>Aspergillus terreus NIH2624</i> : ATET_02726	2.66	0.6396	1	1	5	6	111	11.3	7.39
Afu4g04410	Afu4g04410 AspGDID:ASPL0000106258 COORDS:Chr4_A_fumigatus_Af293:1247460-1248557W, translated using codon table 1 (319 amino acids) Uncharacterized ORF; Immunoreactive protein; has predicted 3-hydroxyacyl-CoA dehydrogenase activity, coenzyme binding, nucleotide binding activity and a putative role in fatty acid metabolism	1.88	0.1442	1	1	3	3	319	33.7	7.37
Afu4g04440	Afu4g04440 AspGDID:ASPL0000106262 COORDS:Chr4_A_fumigatus_Af293:1257195-1254199C, translated using codon table 1 (998 amino acids) Uncharacterized ORF; Ortholog of <i>A. nidulans FGSC A4</i> : AN7005, <i>A. niger CBS 513.88</i> : An14g00390, <i>A. oryzae RIB40</i> : AO090206000049, <i>Aspergillus wentii</i> : Aspwe1_0116246 and <i>Aspergillus sydowii</i> : Aspsy1_0158059	0	0.1132	1	1	8	9	998	109.5	7.25
Afu4g04460	Afu4g04460 AspGDID:ASPL0000106264 COORDS:Chr4_A_fumigatus_Af293:1261402-1262578W, translated using codon table 1 (226 amino acids) Uncharacterized ORF; 60S ribosomal protein L13	2.04	0.1903	1	3	5	5	226	25.6	10.65
Afu4g04520	Afu4g04520 AspGDID:ASPL0000106270 COORDS:Chr4_A_fumigatus_Af293:1276859-1275057C, translated using codon table 1 (444 amino acids) Uncharacterized ORF; Ortholog(s) have mitochondrion localization	0	0.1892	1	2	6	6	444	48	5.71
Afu4g05950	Afu4g05950 AspGDID:ASPL0000106312 COORDS:Chr4_A_fumigatus_Af293:1516600-1515969C, translated using codon table 1 (153 amino acids) Uncharacterized ORF; Ortholog(s) have disulfide oxidoreductase activity, role in cellular response to oxidative stress, response to osmotic stress and mitochondrial matrix localization	0	0.2092	1	1	2	2	153	17.1	7.39
Afu4g06090	Afu4g06090 AspGDID:ASPL0000106326 COORDS:Chr4_A_fumigatus_Af293:1563755-1562471C, translated using codon table 1 (309 amino acids) Uncharacterized ORF; Ortholog(s) have structural molecule activity	2.53	0.178	1	1	3	3	309	34.1	6.34
Afu4g06140	Afu4g06140 AspGDID:ASPL0000106331 COORDS:Chr4_A_fumigatus_Af293:1576220-1573718C, translated using codon table 1 (780 amino acids) Uncharacterized ORF; Ortholog(s) have dipeptidyl-peptidase activity and cytoplasm, nucleus localization	0	0.1244	1	1	7	7	780	87.2	6.68
Afu4g06240	Afu4g06240 AspGDID:ASPL0000106341 COORDS:Chr4_A_fumigatus_Af293:1609280-1609811W, translated using codon table 1 (127 amino acids) Uncharacterized ORF; Has domain(s) with predicted heme binding activity	0	0.4409	1	2	5	6	127	14.5	5.39
Afu4g06390	Afu4g06390 AspGDID:ASPL0000106356 COORDS:Chr4_A_fumigatus_Af293:1638303-1639644W, translated using codon table 1 (333 amino acids) Uncharacterized ORF; Ortholog(s) have mitochondrion localization	1.77	0.0931	1	1	3	4	333	36.3	9.35
Afu4g06530	metR AspGDID:ASPL0000106368 COORDS:Chr4_A_fumigatus_Af293:1678027-1676511C, translated using codon table 1 (305 amino acids) Verified ORF; Predicted bZIP transcription factor, required for assimilation of inorganic sulfur, regulates sulfur and iron homeostasis, required for virulence	0	0.1082	1	1	4	4	305	33	5.24
Afu4g06620	Afu4g06620 AspGDID:ASPL0000106377 COORDS:Chr4_A_fumigatus_Af293:1712343-1713780W, translated using codon table 1 (458 amino acids) Uncharacterized ORF; Glutamate/Leucine/Phenylalanine/Valine dehydrogenase; reacts with rabbit immunosera exposed to A. fumigatus conidia; hypoxia induced protein	18.34	0.3231	1	8	11	12	458	49.3	6.1
Afu4g06820	ecm33 AspGDID:ASPL0000106396 COORDS:Chr4_A_fumigatus_Af293:1762211-1763534W, translated using codon table 1 (398 amino acids) Verified ORF; Putative glycophosphatidylinositol (GPI)-anchored cell wall protein with similarity to S. cerevisiae Ecm33p; mutant conidia display a cell separation defect; hypoxia induced protein	2.59	0.1181	1	1	3	3	398	41.5	4.98
Afu4g06860	Afu4g06860 AspGDID:ASPL0000106400 COORDS:Chr4_A_fumigatus_Af293:1770590-1770090C, translated using codon table 1 (98 amino acids) Uncharacterized ORF; Ortholog of <i>Aspergillus fumigatus A1163</i> : AFUB_063930	0	0.4388	1	1	3	3	98	10.9	5.73
Afu4g07360	metH AspGDID:ASPL0000106450 COORDS:Chr4_A_fumigatus_Af293:1914045-1911526C, translated using codon table 1 (774 amino acids) Uncharacterized ORF; Putative cobalamin-independent methionine synthase; protein induced by heat shock; Yap1-dependent induction in response to hydrogen peroxide; reacts with rabbit immunosera exposed to A. fumigatus conidia; no human homolog	15.55	0.2016	1	8	15	17	774	86.8	6.79
Afu4g07650	cyp6 AspGDID:ASPL0000106480 COORDS:Chr4_A_fumigatus_Af293:1987776-1988776W, translated using codon table 1 (209 amino acids) Uncharacterized ORF; Putative peptidyl-prolyl cis-trans isomerase	4.98	0.2249	1	2	4	5	209	22.9	8.28
Afu4g07690	Afu4g07690 AspGDID:ASPL0000106484 COORDS:Chr4_A_fumigatus_Af293:2001294-2003380W, translated using codon table 1 (595 amino acids) Uncharacterized ORF; Putative phosphoribosylaminoimidazole-carboxamide formyltransferase/IMP cyclohydrolase; hypoxia repressed protein	1.69	0.2269	1	2	10	11	595	65	6.86
Afu4g07700	Afu4g07700 AspGDID:ASPL0000106485 COORDS:Chr4_A_fumigatus_Af293:2006286-2011744W, translated using codon table 1 (1679 amino acids) Uncharacterized ORF; Clathrin, heavy chain; transcript downregulated in response to amphotericin B	4.21	0.1108	1	4	16	17	1679	191.2	5.34
Afu4g07710	Afu4g07710 AspGDID:ASPL0000106486 COORDS:Chr4_A_fumigatus_Af293:2014380-2018024W, translated using codon table 1 (1193 amino acids) Uncharacterized ORF; Putative pyruvate carboxylase; protein induced by heat shock	22.17	0.2037	1	12	19	20	1193	131.2	6.7
Afu4g07730	Afu4g07730 AspGDID:ASPL0000106488 COORDS:Chr4_A_fumigatus_Af293:2023719-2022959C, translated using codon table 1 (176 amino acids) Uncharacterized ORF; 60S ribosomal protein L11; transcript induced by exposure to human airway epithelial cells	4.33	0.1648	1	1	3	3	176	20.1	10.02
Afu4g08480	Afu4g08480 AspGDID:ASPL0000106562 COORDS:Chr4_A_fumigatus_Af293:2190795-2194480W, translated using codon table 1 (1140 amino acids) Uncharacterized ORF; Ortholog(s) have cytosol, nucleus localization	2.25	0.0965	1	2	9	9	1140	124.7	5.15
Afu4g08580	prx1 AspGDID:ASPL0000106571 COORDS:Chr4_A_fumigatus_Af293:2220262-2219313C, translated using codon table 1 (222 amino acids) Uncharacterized ORF; Mitochondrial peroxiredoxin; predicted role in cell redox homeostasis regulation; protein levels increase with amphotericin B and H2O2 exposure; transcript up-regulated in conidia exposed to neutrophils; repressed by gliotoxin exposure	11.1	0.2252	1	5	5	5	222	24.5	6.14
Afu4g08760	Afu4g08760 AspGDID:ASPL0000106592 COORDS:Chr4_A_fumigatus_Af293:2272682-2274369W, translated using codon table 1 (462 amino acids) Uncharacterized ORF; Ortholog(s) have 3-deoxy-7-phosphoheptulonate synthase activity	0	0.0563	1	1	3	3	462	51.1	6.65
Afu4g08880	Afu4g08880 AspGDID:ASPL0000106604 COORDS:Chr4_A_fumigatus_Af293:2309557-2308464C, translated using codon table 1 (318 amino acids) Uncharacterized ORF; Ortholog(s) have glucose-6-phosphate 1-epimerase activity and cytoplasm, nucleus localization	0	0.1006	1	1	2	2	318	35.2	5.87
Afu4g09030	Afu4g09030 AspGDID:ASPL0000106618 COORDS:Chr4_A_fumigatus_Af293:2345336-2342358C, translated using codon table 1 (953 amino acids) Verified ORF; Putative aminopeptidase; conidia-enriched protein; protein induced by heat shock; transcript induced by exposure to human airway epithelial cells; induced by gliotoxin exposure	0	0.1301	1	1	11	14	953	106.2	6.74
Afu4g09090	Afu4g09090 AspGDID:ASPL0000106624 COORDS:Chr4_A_fumigatus_Af293:2376501-2375300C, translated using codon table 1 (333 amino acids) Uncharacterized ORF; Ortholog(s) have role in cellular response to alkyl hydroperoxide and cytosol, nucleus localization	0	0.2222	1	1	5	5	333	36.5	5.01
Afu4g09110	ccp1 AspGDID:ASPL0000106626 COORDS:Chr4_A_fumigatus_Af293:2379568-2378394C, translated using codon table 1 (366 amino acids) Uncharacterized ORF; Putative cytochrome c peroxidase; protein induced by heat shock and by hydrogen peroxide; transcript up-regulated in conidia exposed to neutrophils	4.63	0.388	1	3	12	15	366	40.4	8.56
Afu4g09140	car2 AspGDID:ASPL0000106629 COORDS:Chr4_A_fumigatus_Af293:2388283-2389697W, translated using codon table 1 (450 amino acids) Uncharacterized ORF; L-ornithine aminotransferase; induced by growth on BSA as a sole nitrogen source; SrbA-regulated during hypoxia	0	0.2067	1	1	7	7	450	49.1	6.54
Afu4g09580	aspf2 AspGDID:ASPL0000106672 COORDS:Chr4_A_fumigatus_Af293:2497565-2498644W, translated using codon table 1 (314 amino acids) Verified ORF; Allergen Asp f 2; expressed in alkaline zinc-limiting conditions; shares a divergent promoter with zrfC; higher expression in biofilm vs planktonic cells; fibrinogen binding protein; signal peptide and 4 possible glycosylation sites	20.42	0.1051	1	3	3	6	314	33.3	5.64
Afu4g10020	Afu4g10020 AspGDID:ASPL0000106716 COORDS:Chr4_A_fumigatus_Af293:2596776-2595828C, translated using codon table 1 (242 amino acids) Uncharacterized ORF; Ortholog(s) have Golgi apparatus, cytoplasmic vesicle localization	0	0.0413	1	1	2	2	242	26.1	4.6
Afu4g10050	Afu4g10050 AspGDID:ASPL0000106719 COORDS:Chr4_A_fumigatus_Af293:2602022-2602919W, translated using codon table 1 (149 amino acids) Uncharacterized ORF; Calmodulin	0	0.4027	1	1	5	5	149	17	4.27
Afu4g10200	rfeF AspGDID:ASPL0000106734 COORDS:Chr4_A_fumigatus_Af293:2660389-2663660W, translated using codon table 1 (706 amino acids) Uncharacterized ORF; Putative transcription factor; calcium induced	0	0.1246	1	1	7	8	706	75.1	5.03
Afu4g10410	Afu4g10410 AspGDID:ASPL0000106755 COORDS:Chr4_A_fumigatus_Af293:2732043-2730416C, translated using codon table 1 (429 amino acids) Uncharacterized ORF; Putative aspartate aminotransferase; reacts with rabbit immunosera exposed to A. fumigatus conidia; hypoxia induced protein; transcript induced in conidia exposed to neutrophils or to human airway epithelial cells	5.43	0.1841	1	5	7	8	429	47	8.87
Afu4g10790	Afu4g10790 AspGDID:ASPL0000106792 COORDS:Chr4_A_fumigatus_Af293:2820022-2821193W, translated using codon table 1 (320 amino acids) Uncharacterized ORF; Ortholog(s) have ribose phosphate diphosphokinase activity, role in 5-phosphoribose 1-diphosphate biosynthetic process, cellular response to drug, cytokinesis, fungal-type cell wall organization and cytosol localization	2.58	0.1469	1	1	2	2	320	35	7.5
Afu4g10800	Afu4g10800 AspGDID:ASPL0000106793 COORDS:Chr4_A_fumigatus_Af293:2823433-2822224C, translated using codon table 1 (237 amino acids) Uncharacterized ORF; 40S ribosomal protein S6	1.9	0.1392	1	2	3	3	237	27.3	10.84
Afu4g11080	facA AspGDID:ASPL0000106818 COORDS:Chr4_A_fumigatus_Af293:2893854-2891549C, translated using codon table 1 (670 amino acids) Uncharacterized ORF; Putative acetyl-coenzyme A synthetase with a predicted role in acetate metabolism; transcript up-regulated in conidia exposed to neutrophils; protein induced by heat shock; hypoxia repressed protein	3.8	0.1597	1	2	10	11	670	74.4	6.44
Afu4g11240	aarA AspGDID:ASPL0000106833 COORDS:Chr4_A_fumigatus_Af293:2938272-2942727W, translated using codon table 1 (1425 amino acids) Uncharacterized ORF; Putative alpha-aminoadipate reductase, large subunit, involved in lysine metabolism; predicted essential gene; transcript induced by exposure to human airway epithelial cells	2.39	0.0596	1	1	6	7	1425	157.1	6.07
Afu4g11250	cafA AspGDID:ASPL0000106834 COORDS:Chr4_A_fumigatus_Af293:2943732-2944595W, translated using codon table 1 (287 amino acids) Uncharacterized ORF; Putative carbonic anhydrase; decreased conidiation in the mutant; hypoxia induced protein	2.53	0.1672	1	1	2	2	287	30.8	8.31
Afu4g11300	Afu4g11300 AspGDID:ASPL0000106839 COORDS:Chr4_A_fumigatus_Af293:2961927-2964728W, translated using codon table 1 (857 amino acids) Uncharacterized ORF; Putative vacuolar ATPase 98 kDa subunit; transcript induced by exposure to human airway epithelial cells	2.18	0.1237	1	1	7	8	857	97.7	6.01
Afu4g11330	Afu4g11330 AspGDID:ASPL0000106842 COORDS:Chr4_A_fumigatus_Af293:2975120-2976392W, translated using codon table 1 (379 amino acids) Uncharacterized ORF; Ortholog(s) have ATPase activator activity, chaperone binding activity, role in protein folding, response to stress and cytosol localization	2.29	0.1847	1	1	4	4	379	42.3	6.04
Afu4g11340	lys9 AspGDID:ASPL0000106843 COORDS:Chr4_A_fumigatus_Af293:2978580-2976809C, translated using codon table 1 (450 amino acids) Uncharacterized ORF; Saccharopine dehydrogenase; hypoxia induced protein; transcript induced by exposure to human airway epithelial cells	7.13	0.1289	1	3	5	5	450	49.4	6.28
Afu4g11650	kgd1 AspGDID:ASPL0000106873 COORDS:Chr4_A_fumigatus_Af293:3079845-3083210W, translated using codon table 1 (1057 amino acids) Uncharacterized ORF; Putative alpha-ketoglutarate dehydrogenase complex subunit; protein induced by heat shock	5.59	0.1325	1	3	10	13	1057	118.8	6.95
Afu4g11730	gldB AspGDID:ASPL0000106881 COORDS:Chr4_A_fumigatus_Af293:3102011-3103045W, translated using codon table 1 (325 amino acids) Verified ORF; Putative glycerol dehydrogenase; calcium induced; transcript induced by exposure to human airway epithelial cells	6.66	0.2831	1	4	6	6	325	36.8	6.37
Afu4g12450	Afu4g12450 AspGDID:ASPL0000106952 COORDS:Chr4_A_fumigatus_Af293:3270803-3272689W, translated using codon table 1 (541 amino acids) Uncharacterized ORF; Putative PH domain protein; conserved lysine-rich protein; Yap1-dependent induction in response to hydrogen peroxide; hypoxia repressed protein	12.36	0.2218	1	7	12	13	541	57	5.03
Afu4g12620	ctpA AspGDID:ASPL0000106969 COORDS:Chr4_A_fumigatus_Af293:3314253-3310690C, translated using codon table 1 (1187 amino acids) Verified ORF; Putative transmembrane copper transporter, involved in conidial pigmentation	0	0.0952	1	1	7	7	1187	125.7	6.19
Afu4g12870	Afu4g12870 AspGDID:ASPL0000106993 COORDS:Chr4_A_fumigatus_Af293:3368445-3370387W, translated using codon table 1 (602 amino acids) Uncharacterized ORF; Putative methylmalonate-semialdehyde dehydrogenase; transcript up-regulated in conidia exposed to neutrophils	0	0.1362	1	1	5	8	602	63.8	8.03
Afu4g12950	atg24 AspGDID:ASPL0000107002 COORDS:Chr4_A_fumigatus_Af293:3391576-3389985C, translated using codon table 1 (497 amino acids) Uncharacterized ORF; Putative vacuolar targeting protein; transcript up-regulated in conidia exposed to neutrophils and by exposure to human airway epithelial cells	0	0.0845	1	1	4	6	497	56.8	5.36
Afu4g13120	Afu4g13120 AspGDID:ASPL0000107018 COORDS:Chr4_A_fumigatus_Af293:3436372-3434668C, translated using codon table 1 (358 amino acids) Uncharacterized ORF; Putative glutamine synthetase; protein induced by heat shock and by hydrogen peroxide; transcript induced by exposure to human airway epithelial cells	3.76	0.2318	1	3	5	5	358	39.9	5.71
Afu4g13170	cpcB AspGDID:ASPL0000107023 COORDS:Chr4_A_fumigatus_Af293:3449811-3448364C, translated using codon table 1 (316 amino acids) Verified ORF; G-protein complex beta subunit; conidia-enriched protein; immunoreactive	7.12	0.2089	1	6	7	8	316	35	6.52
Afu4g13720	mpkA AspGDID:ASPL0000107078 COORDS:Chr4_A_fumigatus_Af293:3591547-3593138W, translated using codon table 1 (424 amino acids) Verified ORF; Mitogen-activated protein kinase; activated by phosphorylation; role in cell wall signaling and the oxidative stress response; mpkA(p)-lacZ expression increased by cell wall disturbing compounds; required for adaptation to iron starvation	5.47	0.2052	3	3	7	7	424	48.4	5.88
Afu4g14190	Afu4g14190 AspGDID:ASPL0000107124 COORDS:Chr4_A_fumigatus_Af293:3707667-3709359W, translated using codon table 1 (514 amino acids) Uncharacterized ORF; Ortholog of <i>Aspergillus glaucus</i> : Aspgl1_0029891, Aspgl1_0057413, <i>Aspergillus wentii</i> : Aspwe1_0039585, <i>Aspergillus fumigatus A1163</i> : AFUB_071340 and <i>Aspergillus clavatus NRRL 1</i> : ACLA_053100	0	0.0525	1	1	2	2	514	57	5.19
Afu5g00340	Afu5g00340 AspGDID:ASPL0000107217 COORDS:Chr5_A_fumigatus_Af293:97419-93541C, translated using codon table 1 (1255 amino acids) Uncharacterized ORF; Has domain(s) with predicted ATP binding, ATPase activity, ATPase activity, coupled to transmembrane movement of substances, nucleoside-triphosphatase activity, nucleotide binding activity and role in transmembrane transport	0	0.09	1	1	8	9	1255	137.6	7.21
Afu5g01030	Afu5g01030 AspGDID:ASPL0000107285 COORDS:Chr5_A_fumigatus_Af293:267439-266294C, translated using codon table 1 (332 amino acids) Uncharacterized ORF; Putative glyceraldehyde 3-phosphate dehydrogenase; predicted gene pair with AFUA_5G01970 (gpdA); hypoxia induced protein	1.98	0.0783	1	1	3	3	332	36.1	6.62
Afu5g01440	Afu5g01440 AspGDID:ASPL0000107324 COORDS:Chr5_A_fumigatus_Af293:377687-376891C, translated using codon table 1 (202 amino acids) Uncharacterized ORF; Ortholog(s) have thioredoxin peroxidase activity, role in cell redox homeostasis, cellular response to oxidative stress, response to metal ion and peroxisome, plasma membrane localization	10.96	0.2475	1	4	4	4	202	21.9	8.35
Afu5g01450	Afu5g01450 AspGDID:ASPL0000107325 COORDS:Chr5_A_fumigatus_Af293:379168-377840C, translated using codon table 1 (442 amino acids) Uncharacterized ORF; Putative NADH-dependent flavin oxidoreductase	0	0.0905	1	1	3	3	442	47	6.67
Afu5g01860	Afu5g01860 AspGDID:ASPL0000107366 COORDS:Chr5_A_fumigatus_Af293:473984-473076C, translated using codon table 1 (188 amino acids) Uncharacterized ORF; Ortholog(s) have role in Arp2/3 complex-mediated actin nucleation, actin cortical patch localization, cellular response to drug, endocytosis and establishment of mitochondrion localization, <a href="#GOsection">more</a>	2.69	0.2234	1	1	3	3	188	21.1	6.8
Afu5g01970	gpdA AspGDID:ASPL0000107377 COORDS:Chr5_A_fumigatus_Af293:503797-505194W, translated using codon table 1 (338 amino acids) Verified ORF; Glyceraldehyde-3-phosphate dehydrogenase; predicted gene pair with AFUA_5G01030; protein induced by hydrogen peroxide; reacts with rabbit immunosera exposed to A. fumigatus conidia: induced by L-tyrosine	22.34	0.3609	1	6	10	11	338	36.3	7.43
Afu5g02010	Afu5g02010 AspGDID:ASPL0000107381 COORDS:Chr5_A_fumigatus_Af293:514467-518140W, translated using codon table 1 (1197 amino acids) Uncharacterized ORF; Ortholog(s) have metalloendopeptidase activity	6.14	0.1445	1	4	10	10	1197	136.1	6.54
Afu5g02090	Afu5g02090 AspGDID:ASPL0000107389 COORDS:Chr5_A_fumigatus_Af293:531520-531007C, translated using codon table 1 (144 amino acids) Uncharacterized ORF; Ortholog(s) have role in meiotic chromosome segregation and cytosol, nucleus localization	2.29	0.1875	1	1	2	2	144	16.3	7.5
Afu5g02180	Afu5g02180 AspGDID:ASPL0000107398 COORDS:Chr5_A_fumigatus_Af293:559098-560286W, translated using codon table 1 (371 amino acids) Uncharacterized ORF; Cysteine synthase (o-acetylserine (thiol)-lyase); transcript induced by exposure to human airway epithelial cells	2.11	0.1024	1	1	3	3	371	40.1	8.06
Afu5g02230	Afu5g02230 AspGDID:ASPL0000107403 COORDS:Chr5_A_fumigatus_Af293:571103-569414C, translated using codon table 1 (545 amino acids) Uncharacterized ORF; Putative actin interacting protein; protein induced by hydrogen peroxide	0	0.0495	1	1	2	3	545	60.3	6.28
Afu5g02370	Afu5g02370 AspGDID:ASPL0000107417 COORDS:Chr5_A_fumigatus_Af293:611752-609421C, translated using codon table 1 (686 amino acids) Uncharacterized ORF; Vacuolar ATP synthase catalytic subunit A; hypoxia induced protein; putative essential gene; induced by exposure to human airway epithelial cells	1.91	0.0787	1	1	5	5	686	74.9	6.19
Afu5g02470	nmt1 AspGDID:ASPL0000107427 COORDS:Chr5_A_fumigatus_Af293:638154-636920C, translated using codon table 1 (342 amino acids) Uncharacterized ORF; Thiamine biosynthesis protein, phoB-regulated; protein induced by H2O2; reacts with rabbit immunosera exposed to conidia; hypoxia induced protein; transcript induced by exposure to human airway epithelial cells; induced by gliotoxin	16.74	0.2368	1	5	6	8	342	38.3	6.44
Afu5g02720	Afu5g02720 AspGDID:ASPL0000107452 COORDS:Chr5_A_fumigatus_Af293:710324-714412W, translated using codon table 1 (1362 amino acids) Uncharacterized ORF; Ortholog(s) have phosphoribosylformylglycinamidine synthase activity, role in purine nucleotide biosynthetic process and Golgi apparatus localization	2.28	0.0859	1	2	6	6	1362	147.5	6.13
Afu5g02910	Afu5g02910 AspGDID:ASPL0000107470 COORDS:Chr5_A_fumigatus_Af293:772100-770907C, translated using codon table 1 (354 amino acids) Uncharacterized ORF; NAP family protein	4.58	0.1723	1	2	6	7	354	41	4.5
Afu5g03020	Afu5g03020 AspGDID:ASPL0000107481 COORDS:Chr5_A_fumigatus_Af293:806662-808051W, translated using codon table 1 (373 amino acids) Uncharacterized ORF; 60S ribosomal protein L4	11.29	0.252	1	6	11	12	373	40.5	10.96
Afu5g03080	aspC AspGDID:ASPL0000107487 COORDS:Chr5_A_fumigatus_Af293:834771-833226C, translated using codon table 1 (384 amino acids) Uncharacterized ORF; Putative septin; hypoxia repressed protein; repressed by exposure to artemisinin	6.51	0.2318	2	5	7	8	384	44.4	8.73
Afu5g03490	ndk1 AspGDID:ASPL0000107527 COORDS:Chr5_A_fumigatus_Af293:944280-943353C, translated using codon table 1 (153 amino acids) Uncharacterized ORF; Putative nucleoside diphosphate kinase; induced by L-tyrosine	4.27	0.3987	1	2	4	4	153	16.9	7.97
Afu5g03690	Afu5g03690 AspGDID:ASPL0000107547 COORDS:Chr5_A_fumigatus_Af293:987794-986454C, translated using codon table 1 (424 amino acids) Uncharacterized ORF; Ortholog(s) have phosphatidylinositol transporter activity	2.89	0.1179	1	2	5	5	424	46.1	4.84
Afu5g03810	Afu5g03810 AspGDID:ASPL0000107559 COORDS:Chr5_A_fumigatus_Af293:1024076-1026084W, translated using codon table 1 (623 amino acids) Uncharacterized ORF; Ortholog of <i>A. nidulans FGSC A4</i> : AN11068, <i>A. niger CBS 513.88</i> : An09g06360, <i>Aspergillus wentii</i> : Aspwe1_0602984, <i>Aspergillus sydowii</i> : Aspsy1_0094439 and <i>Aspergillus terreus NIH2624</i> : ATET_08030	0	0.1156	1	1	3	4	623	69	9.11
Afu5g04170	hsp90 AspGDID:ASPL0000107596 COORDS:Chr5_A_fumigatus_Af293:1108402-1110583W, translated using codon table 1 (706 amino acids) Verified ORF; Heat shock protein; allergen Asp f 12; likely essential; required for conidiation and cell wall integrity; transcript induced by growth on hydrogen peroxide; enters the nucleus in response to heat shock	32.5	0.3399	1	13	20	27	706	80.6	5.01
Afu5g04230	cit1 AspGDID:ASPL0000107602 COORDS:Chr5_A_fumigatus_Af293:1129170-1127276C, translated using codon table 1 (474 amino acids) Verified ORF; Putative citrate synthase; reacts with rabbit immunosera exposed to A. fumigatus conidia; transcript induced by exposure to human airway epithelial cells	8.03	0.1308	1	4	6	6	474	52.1	8.57
Afu5g04330	Afu5g04330 AspGDID:ASPL0000107612 COORDS:Chr5_A_fumigatus_Af293:1164058-1160457C, translated using codon table 1 (967 amino acids) Verified ORF; Putative aminopeptidase; conidia-enriched protein; protein induced by heat shock; repressed by gliotoxin exposure	2.32	0.1593	1	3	11	11	967	108.6	6.71
Afu5g05450	rps1 AspGDID:ASPL0000107624 COORDS:Chr5_A_fumigatus_Af293:1266407-1265371C, translated using codon table 1 (256 amino acids) Uncharacterized ORF; 40S ribosomal protein S3Ae; 40S ribosomal protein S1; reacts with rabbit immunosera exposed to A. fumigatus conidia	3.94	0.1133	1	2	3	3	256	29.2	10.04
Afu5g05490	Afu5g05490 AspGDID:ASPL0000107628 COORDS:Chr5_A_fumigatus_Af293:1274938-1276745W, translated using codon table 1 (474 amino acids) Uncharacterized ORF; Ortholog(s) have cytosol localization	0	0.1561	1	1	6	6	474	54.2	6.43
Afu5g05540	nap1 AspGDID:ASPL0000107632 COORDS:Chr5_A_fumigatus_Af293:1289638-1291216W, translated using codon table 1 (411 amino acids) Uncharacterized ORF; Putative nucleosome assembly protein	4.51	0.2384	1	3	6	7	411	46.8	4.55
Afu5g05630	Afu5g05630 AspGDID:ASPL0000107640 COORDS:Chr5_A_fumigatus_Af293:1313445-1312542C, translated using codon table 1 (154 amino acids) Uncharacterized ORF; 60S ribosomal protein L23	1.73	0.1364	1	1	2	2	154	17.1	10.33
Afu5g06040	Afu5g06040 AspGDID:ASPL0000107681 COORDS:Chr5_A_fumigatus_Af293:1435345-1436944W, translated using codon table 1 (376 amino acids) Uncharacterized ORF; Ortholog(s) have ubiquitin binding activity, role in negative regulation of protein catabolic process, nucleotide-excision repair, protein ubiquitination and cytosol, nuclear envelope localization	0	0.0585	1	1	2	2	376	39.8	4.64
Afu5g06130	Afu5g06130 AspGDID:ASPL0000107690 COORDS:Chr5_A_fumigatus_Af293:1465997-1464574C, translated using codon table 1 (331 amino acids) Uncharacterized ORF; Succinyl-CoA synthetase alpha subunit; hypoxia induced protein	0	0.1178	1	2	3	3	331	34.6	8.63
Afu5g06360	Afu5g06360 AspGDID:ASPL0000107712 COORDS:Chr5_A_fumigatus_Af293:1531695-1530676C, translated using codon table 1 (254 amino acids) Uncharacterized ORF; 60S ribosomal protein L8; transcript induced by exposure to human airway epithelial cells	3.01	0.3031	1	1	5	5	254	27.5	10.98
Afu5g06390	Afu5g06390 AspGDID:ASPL0000107715 COORDS:Chr5_A_fumigatus_Af293:1536841-1538186W, translated using codon table 1 (338 amino acids) Uncharacterized ORF; Putative adenosine kinase	0	0.1716	1	2	4	4	338	36.8	5.17
Afu5g06680	gatA AspGDID:ASPL0000107744 COORDS:Chr5_A_fumigatus_Af293:1641603-1643263W, translated using codon table 1 (499 amino acids) Uncharacterized ORF; 4-aminobutyrate aminotransferase; transcript downregulated in response to voriconazole; calcium induced	8.11	0.2204	1	3	7	10	499	55.2	8.94
Afu5g06810	Afu5g06810 AspGDID:ASPL0000107757 COORDS:Chr5_A_fumigatus_Af293:1677148-1674770C, translated using codon table 1 (630 amino acids) Uncharacterized ORF; Has domain(s) with predicted role in GPI anchor biosynthetic process and endoplasmic reticulum membrane localization	0	0.1222	1	1	5	5	630	70.4	6.73
Afu5g07300	Afu5g07300 AspGDID:ASPL0000107804 COORDS:Chr5_A_fumigatus_Af293:1814759-1815768W, translated using codon table 1 (260 amino acids) Uncharacterized ORF; Electron transfer flavoprotein, beta subunit	0	0.3654	1	2	8	8	260	28.2	8.97
Afu5g08050	Afu5g08050 AspGDID:ASPL0000107877 COORDS:Chr5_A_fumigatus_Af293:2042382-2039865C, translated using codon table 1 (654 amino acids) Uncharacterized ORF; Putative aminopeptidase P	2.22	0.1651	1	1	6	9	654	72.6	6.34
Afu5g08090	pyroA AspGDID:ASPL0000107881 COORDS:Chr5_A_fumigatus_Af293:2051048-2050001C, translated using codon table 1 (308 amino acids) Uncharacterized ORF; Putative pyridoxine biosynthesis protein	5.19	0.3896	1	5	8	9	308	32.7	6.43
Afu5g08270	Afu5g08270 AspGDID:ASPL0000107899 COORDS:Chr5_A_fumigatus_Af293:2100834-2100024C, translated using codon table 1 (244 amino acids) Uncharacterized ORF; Putative HAD superfamily hydrolase; hypoxia repressed protein	0	0.209	1	1	4	4	244	27.3	5.05
Afu5g08290	Afu5g08290 AspGDID:ASPL0000107901 COORDS:Chr5_A_fumigatus_Af293:2105292-2104352C, translated using codon table 1 (283 amino acids) Uncharacterized ORF; Ortholog(s) have intracellular localization	1.84	0.1272	1	2	3	3	283	31.4	6.7
Afu5g08540	aspA AspGDID:ASPL0000107925 COORDS:Chr5_A_fumigatus_Af293:2167838-2169399W, translated using codon table 1 (382 amino acids) Verified ORF; Septin; hypoxia repressed protein; repressed by exposure to artemisinin	4.29	0.0969	1	3	3	3	382	43.3	5.14
Afu5g08830	hexA AspGDID:ASPL0000107954 COORDS:Chr5_A_fumigatus_Af293:2265787-2268175W, translated using codon table 1 (537 amino acids) Verified ORF; Putative woronin body protein; hypoxia repressed protein	2.26	0.0857	1	1	5	5	537	61.4	8.79
Afu5g08900	Afu5g08900 AspGDID:ASPL0000107961 COORDS:Chr5_A_fumigatus_Af293:2286011-2284725C, translated using codon table 1 (362 amino acids) Uncharacterized ORF; Putative d-arabitinol dehydrogenase	0	0.0525	1	2	2	2	362	39.4	7.24
Afu5g09210	alp2 AspGDID:ASPL0000107990 COORDS:Chr5_A_fumigatus_Af293:2366798-2365176C, translated using codon table 1 (495 amino acids) Verified ORF; Autophagic (vacuolar) serine protease; allergen Asp f 18; predicted signal sequence for secretion; transcript induced by growth on hydrogen peroxide; transcript up-regulated in conidia exposed to neutrophils	5.35	0.1616	1	4	6	6	495	52.6	6.25
Afu5g09230	Afu5g09230 AspGDID:ASPL0000107992 COORDS:Chr5_A_fumigatus_Af293:2377061-2378400W, translated using codon table 1 (324 amino acids) Verified ORF; Putative transaldolase; abundant protein in conidia and mycelia; protein induced by hydrogen peroxide and hypoxia	26.92	0.3086	1	7	10	14	324	35.4	6.44
Afu5g09250	Afu5g09250 AspGDID:ASPL0000107994 COORDS:Chr5_A_fumigatus_Af293:2380881-2384038W, translated using codon table 1 (980 amino acids) Uncharacterized ORF; Ortholog(s) have cytosol localization	0	0.1571	1	2	11	12	980	108.6	6.29
Afu5g09330	cipC AspGDID:ASPL0000108002 COORDS:Chr5_A_fumigatus_Af293:2402867-2402275C, translated using codon table 1 (130 amino acids) Verified ORF; CipC-like, hyphal-specific protein; not concanamycin A or stress induced as it is in A. nidulans; reacts with rabbit immunosera exposed to A. fumigatus conidia	3.37	0.4615	1	1	4	4	130	15	6.27
Afu5g09360	calA AspGDID:ASPL0000108005 COORDS:Chr5_A_fumigatus_Af293:2410482-2408570C, translated using codon table 1 (558 amino acids) Verified ORF; Calcineurin A catalytic subunit; required for normal growth, cell wall integrity, conidiation and virulence	2.58	0.0878	1	2	5	5	558	63.8	5.86
Afu5g09860	Afu5g09860 AspGDID:ASPL0000108054 COORDS:Chr5_A_fumigatus_Af293:2552613-2551525C, translated using codon table 1 (287 amino acids) Uncharacterized ORF; Putative esterase	1.93	0.1672	1	2	4	4	287	31.5	6.73
Afu5g10370	sdh2 AspGDID:ASPL0000108103 COORDS:Chr5_A_fumigatus_Af293:2655836-2654821C, translated using codon table 1 (299 amino acids) Uncharacterized ORF; Iron-sulfur protein subunit of succinate dehydrogenase with a predicted role in the citric acid cycle; transcript up-regulated in conidia exposed to neutrophils; induced by exposure to artemisinin; transcript downregulated by hypoxia	4.91	0.0401	1	2	2	2	299	33.9	8.92
Afu5g10550	Afu5g10550 AspGDID:ASPL0000108119 COORDS:Chr5_A_fumigatus_Af293:2702208-2700129C, translated using codon table 1 (519 amino acids) Uncharacterized ORF; ATP synthase F1, beta subunit; reacts with rabbit immunosera exposed to A. fumigatus conidia; hypoxia induced protein	4.94	0.3333	1	3	11	12	519	55.6	5.44
Afu5g10780	uge5 AspGDID:ASPL0000108140 COORDS:Chr5_A_fumigatus_Af293:2756278-2757615W, translated using codon table 1 (371 amino acids) Verified ORF; UDP-glucose 4-epimerase required for galactose metabolism; hypoxia induced protein	14.92	0.1536	1	4	5	6	371	40.6	6.25
Afu5g11230	rasA AspGDID:ASPL0000108182 COORDS:Chr5_A_fumigatus_Af293:2871589-2870648C, translated using codon table 1 (213 amino acids) Verified ORF; Ras family GTPase protein	2.59	0.2113	1	2	4	4	213	23.9	5.06
Afu5g11290	Afu5g11290 AspGDID:ASPL0000108188 COORDS:Chr5_A_fumigatus_Af293:2892452-2891116C, translated using codon table 1 (364 amino acids) Uncharacterized ORF; Ortholog(s) have D-amino-acid oxidase activity and role in D-alanine metabolic process, D-valine metabolic process	0	0.0824	1	1	2	2	364	39.5	7.91
Afu5g11320	aspf29 AspGDID:ASPL0000108191 COORDS:Chr5_A_fumigatus_Af293:2903022-2902611C, translated using codon table 1 (110 amino acids) Verified ORF; Allergen Asp f 29; putative thioredoxin	7.68	0.6545	1	4	6	7	110	12	5.22
Afu5g11380	Afu5g11380 AspGDID:ASPL0000108197 COORDS:Chr5_A_fumigatus_Af293:2924786-2923943C, translated using codon table 1 (197 amino acids) Uncharacterized ORF; Putative Rho-GDP dissociation inhibitor; transcript and protein levels increased in response to amphotericin B	0	0.2132	1	2	3	3	197	22.3	5.91
Afu5g11430	Afu5g11430 AspGDID:ASPL0000108202 COORDS:Chr5_A_fumigatus_Af293:2936781-2937984W, translated using codon table 1 (382 amino acids) Verified ORF; Putative quinone oxidoreductase; conidia-enriched protein; hypoxia repressed protein	5.09	0.2906	1	4	7	7	382	41.4	8.9
Afu5g11560	Afu5g11560 AspGDID:ASPL0000108213 COORDS:Chr5_A_fumigatus_Af293:2965961-2964433C, translated using codon table 1 (439 amino acids) Uncharacterized ORF; Ortholog(s) have ATP binding activity	4.7	0.1412	1	2	4	4	439	47.6	6.55
Afu5g11720	Afu5g11720 AspGDID:ASPL0000108229 COORDS:Chr5_A_fumigatus_Af293:3015667-3018681W, translated using codon table 1 (905 amino acids) Uncharacterized ORF; Ortholog(s) have role in proteasome-mediated ubiquitin-dependent protein catabolic process and cytosol, nucleus localization	1.66	0.1536	1	1	9	10	905	100.7	5.01
Afu5g11870	Afu5g11870 AspGDID:ASPL0000108243 COORDS:Chr5_A_fumigatus_Af293:3061396-3064971W, translated using codon table 1 (1051 amino acids) Uncharacterized ORF; Ortholog(s) have role in cellular protein localization, positive regulation of ubiquitin-specific protease activity and cell cortex of cell tip, cell division site, cytosol localization	2.11	0.0761	1	1	5	5	1051	114.2	5.45
Afu5g12180	Afu5g12180 AspGDID:ASPL0000108274 COORDS:Chr5_A_fumigatus_Af293:3157322-3158399W, translated using codon table 1 (247 amino acids) Uncharacterized ORF; Ortholog(s) have Ran GTPase binding activity and role in G1/S transition of mitotic cell cycle, RNA export from nucleus, Ran protein signal transduction, protein import into nucleus, ubiquitin-dependent protein catabolic process	3.06	0.2874	1	1	5	6	247	27.6	4.98
Afu5g12260	tigA AspGDID:ASPL0000108282 COORDS:Chr5_A_fumigatus_Af293:3183118-3184297W, translated using codon table 1 (368 amino acids) Uncharacterized ORF; Putative disulfide isomerase	1.63	0.087	1	2	3	3	368	40.2	6.44
Afu5g12680	Afu5g12680 AspGDID:ASPL0000108322 COORDS:Chr5_A_fumigatus_Af293:3294659-3297579W, translated using codon table 1 (896 amino acids) Uncharacterized ORF; Ortholog(s) have ubiquitin-protein transferase activity	0	0.1016	1	1	8	10	896	101.7	8.94
Afu5g12780	Afu5g12780 AspGDID:ASPL0000108332 COORDS:Chr5_A_fumigatus_Af293:3352075-3353129W, translated using codon table 1 (332 amino acids) Uncharacterized ORF; Ortholog of <i>A. nidulans FGSC A4</i> : AN8430, <i>A. niger CBS 513.88</i> : An18g00330, <i>A. oryzae RIB40</i> : AO090010000134, <i>Neosartorya fischeri NRRL 181</i> : NFIA_074390 and <i>Aspergillus wentii</i> : Aspwe1_0449405	6.89	0.2922	1	3	7	7	332	35.8	5.31
Afu5g13240	Afu5g13240 AspGDID:ASPL0000108377 COORDS:Chr5_A_fumigatus_Af293:3482267-3478094C, translated using codon table 1 (1359 amino acids) Uncharacterized ORF; Has domain(s) with predicted inositol-1,4,5-trisphosphate 3-kinase activity	3.85	0.1486	1	1	14	18	1359	151.5	7.55
Afu5g13450	Afu5g13450 AspGDID:ASPL0000108398 COORDS:Chr5_A_fumigatus_Af293:3535793-3536876W, translated using codon table 1 (249 amino acids) Verified ORF; Putative triosephosphate isomerase; protein abundant in conidia; reacts with rabbit immunosera exposed to A. fumigatus conidia' transcript induced by exposure to human airway epithelial cells	12.45	0.3414	1	5	7	7	249	27.1	5.8
Afu5g13920	wos2 AspGDID:ASPL0000108443 COORDS:Chr5_A_fumigatus_Af293:3643780-3644692W, translated using codon table 1 (201 amino acids) Uncharacterized ORF; Putative Hsp90 binding co-chaperone; reacts with rabbit immunosera exposed to A. fumigatus conidia	3.21	0.1144	1	1	2	2	201	22.2	4.48
Afu5g14680	Afu5g14680 AspGDID:ASPL0000108517 COORDS:Chr5_A_fumigatus_Af293:3799759-3800442W, translated using codon table 1 (227 amino acids) Verified ORF; Protein with Yap1-dependent induction in response to hydrogen peroxide; calcium downregulated; induced by gliotoxin exposure	2.56	0.1718	1	1	4	4	227	25.4	4.91
Afu5g14880	Afu5g14880 AspGDID:ASPL0000108536 COORDS:Chr5_A_fumigatus_Af293:3849477-3847948C, translated using codon table 1 (509 amino acids) Uncharacterized ORF; Ortholog(s) have mitochondrion localization	6.48	0.1041	1	2	4	4	509	57.5	5.48
Afu6g00180	Afu6g00180 AspGDID:ASPL0000108571 COORDS:Chr6_A_fumigatus_Af293:56057-53313C, translated using codon table 1 (109 amino acids) Verified ORF; Fibrinogen-binding protein of unknown function	0	0.3211	1	1	2	3	109	12.1	8.18
Afu6g00570	Afu6g00570 AspGDID:ASPL0000108612 COORDS:Chr6_A_fumigatus_Af293:143403-142206C, translated using codon table 1 (397 amino acids) Uncharacterized ORF; Ortholog of <i>A. nidulans FGSC A4</i> : AN6456, AN6670, <i>Aspergillus versicolor</i> : Aspve1_0062160, <i>Aspergillus fumigatus A1163</i> : AFUB_096920 and <i>Aspergillus clavatus NRRL 1</i> : ACLA_004220	1.64	0.0655	1	1	2	3	397	43.1	8.07
Afu6g00660	Afu6g00660 AspGDID:ASPL0000108620 COORDS:Chr6_A_fumigatus_Af293:170160-171220W, translated using codon table 1 (322 amino acids) Uncharacterized ORF; Ortholog(s) have role in asperthecin biosynthetic process	1.99	0.0932	1	2	2	2	322	35.8	5.52
Afu6g01940	Afu6g01940 AspGDID:ASPL0000108649 COORDS:Chr6_A_fumigatus_Af293:282872-284077W, translated using codon table 1 (317 amino acids) Uncharacterized ORF; Dienelactone hydrolase family protein; transcript up-regulated in conidia exposed to neutrophils	4.3	0.1104	1	3	4	4	317	35	8.59
Afu6g02230	glkA AspGDID:ASPL0000108678 COORDS:Chr6_A_fumigatus_Af293:395467-393918C, translated using codon table 1 (493 amino acids) Verified ORF; Putative glucokinase; conidia-enriched protein; transcripts extremely abundant in resting conidia, levels decline during germination; transcript induced by exposure to human airway epithelial cells	2.38	0.1684	1	1	6	6	493	54.4	5.5
Afu6g02280	aspf3 AspGDID:ASPL0000108683 COORDS:Chr6_A_fumigatus_Af293:408478-407732C, translated using codon table 1 (168 amino acids) Verified ORF; Allergen Asp f 3; peroxiredoxin family reductase; putative peroxismal membrane protein; IgE binding; protein induced by heat shock and by exposure to hydrogen peroxide; hypoxia induced protein; induced by gliotoxin exposure	19.1	0.375	1	6	6	8	168	18.4	5.58
Afu6g02470	Afu6g02470 AspGDID:ASPL0000108702 COORDS:Chr6_A_fumigatus_Af293:466824-464770C, translated using codon table 1 (582 amino acids) Uncharacterized ORF; Putative fumarate hydratase; reacts with rabbit immunosera exposed to A. fumigatus conidia	5.14	0.2251	1	3	8	8	582	63.1	8.97
Afu6g02910	argEF AspGDID:ASPL0000108747 COORDS:Chr6_A_fumigatus_Af293:603327-600472C, translated using codon table 1 (906 amino acids) Verified ORF; Mitochondrial bifunctional enzyme with N-acetyl-gamma-glutamyl-phosphate reductase and acetylglutamate kinase activity, catalyzes the second and third step in arginine biosynthesis	1.62	0.1799	1	1	11	11	906	99.4	8.15
Afu6g02960	Afu6g02960 AspGDID:ASPL0000108752 COORDS:Chr6_A_fumigatus_Af293:615290-614806C, translated using codon table 1 (94 amino acids) Uncharacterized ORF; Ortholog(s) have mitochondrion localization	0	0.2872	1	2	2	2	94	10.7	9.66
Afu6g03730	Afu6g03730 AspGDID:ASPL0000108828 COORDS:Chr6_A_fumigatus_Af293:823850-821958C, translated using codon table 1 (558 amino acids) Uncharacterized ORF; 2-methylcitrate dehydratase; hypoxia repressed protein; transcript up-regulated in conidia exposed to neutrophils and to human airway epithelial cells; no human homolog	3.51	0.129	1	2	7	7	558	62.1	8.37
Afu6g03820	egd2 AspGDID:ASPL0000108837 COORDS:Chr6_A_fumigatus_Af293:841323-840546C, translated using codon table 1 (204 amino acids) Uncharacterized ORF; Nascent polypeptide-associated complex subunit alpha; predicted role in 'de novo' cotranslational protein folding; enriched in dormant conidia	1.96	0.1422	1	1	2	6	204	22	4.94
Afu6g03830	Afu6g03830 AspGDID:ASPL0000108838 COORDS:Chr6_A_fumigatus_Af293:842693-842009C, translated using codon table 1 (149 amino acids) Uncharacterized ORF; Ribosomal protein L14	7.73	0.2617	1	2	4	5	149	16.7	10.29
Afu6g04010	Afu6g04010 AspGDID:ASPL0000108856 COORDS:Chr6_A_fumigatus_Af293:901498-904822W, translated using codon table 1 (962 amino acids) Uncharacterized ORF; Ortholog(s) have importin-alpha export receptor activity, role in cell division, protein export from nucleus and nuclear membrane localization	1.79	0.1622	1	2	11	11	962	108.4	5.38
Afu6g04430	Afu6g04430 AspGDID:ASPL0000108897 COORDS:Chr6_A_fumigatus_Af293:1013586-1012672C, translated using codon table 1 (228 amino acids) Uncharacterized ORF; Ortholog(s) have acireductone dioxygenase (Ni2+-requiring) activity, role in L-methionine biosynthetic process from methylthioadenosine and cytosol, nucleus localization	0	0.2412	1	1	3	4	228	26.3	6.24
Afu6g04570	Afu6g04570 AspGDID:ASPL0000108911 COORDS:Chr6_A_fumigatus_Af293:1060589-1062452W, translated using codon table 1 (482 amino acids) Uncharacterized ORF; Putative translational elongation factor eEF-1 gamma subunit; protein induced by heat shock; transcript induced by exposure to human airway epithelial cells; snoRNA Afu-328 encoded within intron 2	15.25	0.2095	1	7	9	9	482	54.1	7.64
Afu6g04740	act1 AspGDID:ASPL0000108928 COORDS:Chr6_A_fumigatus_Af293:1114434-1113100C, translated using codon table 1 (393 amino acids) Verified ORF; Actin	5.64	0.1221	1	2	3	4	393	43.9	6.28
Afu6g04920	fdh AspGDID:ASPL0000108946 COORDS:Chr6_A_fumigatus_Af293:1161764-1163212W, translated using codon table 1 (418 amino acids) Verified ORF; Putative NAD-dependent formate dehydrogenase; protein more abundant in conidia than mycelia; transcript up-regulated in conidia exposed to neutrophils; protein induced by heat shock; SrbA-regulated during hypoxia	9.56	0.2871	1	5	9	9	418	45.7	8.27
Afu6g04970	Afu6g04970 AspGDID:ASPL0000108951 COORDS:Chr6_A_fumigatus_Af293:1181194-1182540W, translated using codon table 1 (428 amino acids) Uncharacterized ORF; Ortholog(s) have O-phospho-L-serine:2-oxoglutarate aminotransferase activity, role in L-serine biosynthetic process, purine nucleobase biosynthetic process and cytosol localization	3.94	0.2664	1	4	8	8	428	46.9	6.81
Afu6g05050	Afu6g05050 AspGDID:ASPL0000108960 COORDS:Chr6_A_fumigatus_Af293:1201169-1199826C, translated using codon table 1 (346 amino acids) Uncharacterized ORF; Ortholog(s) have role in posttranslational protein targeting to membrane, protein insertion into ER membrane and TRC complex, nucleus localization	2.63	0.1416	2	1	3	3	346	37.9	6.13
Afu6g05150	Afu6g05150 AspGDID:ASPL0000108970 COORDS:Chr6_A_fumigatus_Af293:1231600-1234035W, translated using codon table 1 (588 amino acids) Uncharacterized ORF; Ortholog(s) have histone binding, transcription corepressor activity	1.71	0.1293	1	1	6	6	588	64	6.9
Afu6g05200	Afu6g05200 AspGDID:ASPL0000108975 COORDS:Chr6_A_fumigatus_Af293:1248660-1249485W, translated using codon table 1 (157 amino acids) Uncharacterized ORF; 60S ribosomal protein L28	5.1	0.293	1	2	3	3	157	17	10.83
Afu6g05210	Afu6g05210 AspGDID:ASPL0000108976 COORDS:Chr6_A_fumigatus_Af293:1250905-1252499W, translated using codon table 1 (330 amino acids) Verified ORF; Putative NAD-dependent malate dehydrogenase with a predicted role in the citric acid cycle; transcript up-regulated in conidia exposed to neutrophils; phoB-regulated; reacts with rabbit immunosera exposed to A. fumigatus conidia	1.92	0.1909	1	2	4	4	330	34.8	7.24
Afu6g06345	Afu6g06345 AspGDID:ASPL0000108995 COORDS:Chr6_A_fumigatus_Af293:1347575-1348344W, translated using codon table 1 (205 amino acids) Uncharacterized ORF; Ortholog(s) have 6,7-dimethyl-8-ribityllumazine synthase activity, role in riboflavin biosynthetic process and mitochondrial intermembrane space, nucleus localization	0	0.4341	1	1	5	5	205	21.5	6.1
Afu6g06370	Afu6g06370 AspGDID:ASPL0000108998 COORDS:Chr6_A_fumigatus_Af293:1367479-1369026W, translated using codon table 1 (386 amino acids) Uncharacterized ORF; NAD(+)-isocitrate dehydrogenase subunit I	1.87	0.1373	1	1	4	4	386	41.9	8.75
Afu6g06500	Afu6g06500 AspGDID:ASPL0000109011 COORDS:Chr6_A_fumigatus_Af293:1401790-1403080W, translated using codon table 1 (363 amino acids) Uncharacterized ORF; Actin-related protein 2/3 complex subunit 1A; transcript up-regulated in conidia exposed to neutrophils	0	0.1433	1	1	3	3	363	40	7.03
Afu6g06580	Afu6g06580 AspGDID:ASPL0000109019 COORDS:Chr6_A_fumigatus_Af293:1433532-1432446C, translated using codon table 1 (269 amino acids) Uncharacterized ORF; Ortholog(s) have phosphomannomutase activity, role in ER to Golgi vesicle-mediated transport, establishment or maintenance of cell polarity, nuclear envelope organization, protein targeting to ER and cytosol, nucleus localization	0	0.052	1	1	2	2	269	30.6	5.67
Afu6g06750	Afu6g06750 AspGDID:ASPL0000109037 COORDS:Chr6_A_fumigatus_Af293:1474803-1476209W, translated using codon table 1 (272 amino acids) Uncharacterized ORF; 14-3-3 family protein; predicted gene pair with AFUA_2G03290 (artA)	7.12	0.511	1	6	11	13	272	30.7	4.92
Afu6g06770	aspf22 AspGDID:ASPL0000109039 COORDS:Chr6_A_fumigatus_Af293:1480347-1478847C, translated using codon table 1 (438 amino acids) Verified ORF; Putative enolase; allergen Asp f 22; conidia-enriched protein; transcript induced by growth on hydrogen peroxide; hypoxia induced protein; transcript induced by exposure to human airway epithelial cells	39.68	0.363	1	9	11	15	438	47.3	5.58
Afu6g06780	rpt4 AspGDID:ASPL0000109040 COORDS:Chr6_A_fumigatus_Af293:1481801-1483206W, translated using codon table 1 (393 amino acids) Uncharacterized ORF; Proteasome regulatory particle subunit; transcript induced by exposure to human airway epithelial cells	1.99	0.3308	1	1	8	8	393	44.1	5.81
Afu6g07120	nudC AspGDID:ASPL0000109074 COORDS:Chr6_A_fumigatus_Af293:1600128-1600861W, translated using codon table 1 (200 amino acids) Uncharacterized ORF; Essential protein involved in nuclear movement	0	0.21	1	1	3	3	200	22.7	5.11
Afu6g07430	Afu6g07430 AspGDID:ASPL0000109105 COORDS:Chr6_A_fumigatus_Af293:1677465-1679554W, translated using codon table 1 (527 amino acids) Uncharacterized ORF; Putative pyruvate kinase; reacts with rabbit immunosera exposed to A. fumigatus conidia	5.18	0.3093	1	7	11	12	527	58.3	7.03
Afu6g07600	Afu6g07600 AspGDID:ASPL0000109120 COORDS:Chr6_A_fumigatus_Af293:1727409-1725518C, translated using codon table 1 (611 amino acids) Uncharacterized ORF; Has domain(s) with predicted oxidoreductase activity and role in oxidation-reduction process	0	0.0638	1	1	2	2	611	66.4	5.88
Afu6g07760	Afu6g07760 AspGDID:ASPL0000109136 COORDS:Chr6_A_fumigatus_Af293:1770437-1772048W, translated using codon table 1 (492 amino acids) Uncharacterized ORF; Ortholog(s) have structural molecule activity	0	0.065	1	1	2	2	492	54.5	6.49
Afu6g07770	Afu6g07770 AspGDID:ASPL0000109137 COORDS:Chr6_A_fumigatus_Af293:1773673-1775224W, translated using codon table 1 (501 amino acids) Uncharacterized ORF; Putative alanine aminotransferase	1.96	0.1238	1	1	5	5	501	55.1	5.96
Afu6g08050	gnd1 AspGDID:ASPL0000109165 COORDS:Chr6_A_fumigatus_Af293:1868427-1870349W, translated using codon table 1 (491 amino acids) Verified ORF; 6-phosphogluconate dehydrogenase; conidia-enriched protein; protein induced by heat shock; reacts with rabbit immunosera exposed to conidia; hypoxia-induced protein; transcript induced by exposure to human airway epithelial cells	26.84	0.3116	1	9	10	13	491	54.1	5.94
Afu6g08360	Afu6g08360 AspGDID:ASPL0000109193 COORDS:Chr6_A_fumigatus_Af293:1958167-1959214W, translated using codon table 1 (332 amino acids) Uncharacterized ORF; Thiazole biosynthesis enzyme; hypoxia induced protein; induced by gliotoxin exposure	6.82	0.2199	1	2	5	6	332	35.5	5.85
Afu6g08720	Afu6g08720 AspGDID:ASPL0000109228 COORDS:Chr6_A_fumigatus_Af293:2067644-2066477C, translated using codon table 1 (342 amino acids) Uncharacterized ORF; Putative 5'-methylthioadenosine phosphorylase; transcript induced by exposure to human airway epithelial cells	2.23	0.0673	1	1	2	2	342	37.6	7.39
Afu6g08920	Afu6g08920 AspGDID:ASPL0000109248 COORDS:Chr6_A_fumigatus_Af293:2125824-2122684C, translated using codon table 1 (1046 amino acids) Uncharacterized ORF; Assimilatory sulfite reductase	0	0.0344	1	1	3	3	1046	114.5	5.14
Afu6g09690	gliG AspGDID:ASPL0000109325 COORDS:Chr6_A_fumigatus_Af293:2364218-2363390C, translated using codon table 1 (240 amino acids) Verified ORF; Glutathione S-transferase encoded in the gliotoxin biosynthetic gene cluster; required for gliotoxin biosynthesis; increased expression in biofilm; induced by gliotoxin in some strains; not involved in self-protection against gliotoxin	0	0.1708	1	1	2	2	240	27.5	7.15
Afu6g09720	gliN AspGDID:ASPL0000109328 COORDS:Chr6_A_fumigatus_Af293:2368912-2367948C, translated using codon table 1 (282 amino acids) Verified ORF; Predicted methyltransferase, encoded in the putative gliotoxin biosynthetic gene cluster	0	0.0674	1	1	2	4	282	32.2	5.55
Afu6g09920	Afu6g09920 AspGDID:ASPL0000109348 COORDS:Chr6_A_fumigatus_Af293:2439681-2441534W, translated using codon table 1 (617 amino acids) Uncharacterized ORF; Ortholog of <i>A. nidulans FGSC A4</i> : AN10946, <i>A. niger CBS 513.88</i> : An11g07970, <i>A. oryzae RIB40</i> : AO090001000626, <i>Neosartorya fischeri NRRL 181</i> : NFIA_055650 and <i>Aspergillus wentii</i> : Aspwe1_0045804	2.95	0.1394	1	1	5	5	617	65.3	9.57
Afu6g10260	akr1 AspGDID:ASPL0000109382 COORDS:Chr6_A_fumigatus_Af293:2540226-2538892C, translated using codon table 1 (334 amino acids) Verified ORF; Putative aldehyde reductase; abundant protein in conidia; transcript up-regulated in conidia exposed to neutrophils and to human airway epithelial cells	13.74	0.2365	1	5	6	8	334	37.2	6.47
Afu6g10610	Afu6g10610 AspGDID:ASPL0000109416 COORDS:Chr6_A_fumigatus_Af293:2625814-2626707W, translated using codon table 1 (272 amino acids) Uncharacterized ORF; Putative ribose 5-phosphate isomerase A	0	0.114	1	1	2	2	272	28.4	6.25
Afu6g10650	Afu6g10650 AspGDID:ASPL0000109420 COORDS:Chr6_A_fumigatus_Af293:2633292-2631089C, translated using codon table 1 (657 amino acids) Uncharacterized ORF; Putative ATP citrate lyase, subunit 1; protein induced by heat shock	19.71	0.2131	1	8	12	13	657	71.9	8.48
Afu6g10660	Afu6g10660 AspGDID:ASPL0000109421 COORDS:Chr6_A_fumigatus_Af293:2635628-2637150W, translated using codon table 1 (486 amino acids) Uncharacterized ORF; Putative ATP citrate lyase subunit; repressed by gliotoxin exposure22405895	12.88	0.1564	1	7	7	7	486	52.9	6.27
Afu6g10830	pphB AspGDID:ASPL0000109438 COORDS:Chr6_A_fumigatus_Af293:2675009-2673676C, translated using codon table 1 (329 amino acids) Uncharacterized ORF; Ortholog(s) have protein serine/threonine phosphatase activity	2.21	0.1489	1	2	3	6	329	37.7	5.06
Afu6g10880	Afu6g10880 AspGDID:ASPL0000109443 COORDS:Chr6_A_fumigatus_Af293:2684765-2683062C, translated using codon table 1 (512 amino acids) Uncharacterized ORF; Putative acyl-CoA dehydrogenase; transcript up-regulated in conidia exposed to neutrophils	0	0.0801	1	1	3	3	512	57.5	7.97
Afu6g11160	idi1 AspGDID:ASPL0000109466 COORDS:Chr6_A_fumigatus_Af293:2753055-2752098C, translated using codon table 1 (279 amino acids) Uncharacterized ORF; Isopentenyl diphosphate isomerase; SrbA-regulated during hypoxia	0	0.1004	1	1	2	2	279	31.6	5.05
Afu6g11260	Afu6g11260 AspGDID:ASPL0000109476 COORDS:Chr6_A_fumigatus_Af293:2786302-2787411W, translated using codon table 1 (266 amino acids) Uncharacterized ORF; Ribosomal protein L26; transcript induced by exposure to human airway epithelial cells	0	0.2782	1	1	5	5	266	29.6	10.98
Afu6g11310	Afu6g11310 AspGDID:ASPL0000109481 COORDS:Chr6_A_fumigatus_Af293:2801160-2808052W, translated using codon table 1 (2256 amino acids) Uncharacterized ORF; Ortholog(s) have GMP synthase (glutamine-hydrolyzing) activity, aspartate carbamoyltransferase activity, carbamoyl-phosphate synthase (glutamine-hydrolyzing) activity, dihydroorotase activity	2.51	0.1361	1	1	22	27	2256	248.3	6.58
Afu6g11430	aldA AspGDID:ASPL0000109492 COORDS:Chr6_A_fumigatus_Af293:2837140-2839051W, translated using codon table 1 (559 amino acids) Verified ORF; Putative aldehyde dehydrogenase; predicted gene pair with AFUA_7G01000; hypoxia repressed protein; transcript up-regulated in conidia exposed to neutrophils; immunoreactive protein	16.84	0.2415	2	8	10	12	559	60.9	6.73
Afu6g11850	Afu6g11850 AspGDID:ASPL0000109531 COORDS:Chr6_A_fumigatus_Af293:2961275-2962537W, translated using codon table 1 (397 amino acids) Uncharacterized ORF; Protein of unknown function; hypoxia induced protein	12.51	0.1612	1	5	6	6	397	44.2	8.48
Afu6g11890	Afu6g11890 AspGDID:ASPL0000109535 COORDS:Chr6_A_fumigatus_Af293:2972392-2969433C, translated using codon table 1 (930 amino acids) Uncharacterized ORF; Putative dynamin GTPase	2.18	0.1269	1	2	9	10	930	104.3	6.83
Afu6g12100	Afu6g12100 AspGDID:ASPL0000109555 COORDS:Chr6_A_fumigatus_Af293:3042096-3042951W, translated using codon table 1 (237 amino acids) Verified ORF; Putative nitrolase/amidohydrolase; member of the fumiquinazoline biosynthetic cluster	0	0.2574	1	1	2	2	237	25.9	7.27
Afu6g12170	fkbp1 AspGDID:ASPL0000109562 COORDS:Chr6_A_fumigatus_Af293:3060448-3061084W, translated using codon table 1 (112 amino acids) Uncharacterized ORF; Putative FK506-binding protein (FKBP)-type peptidyl-prolyl cis-trans isomerase; transcript induced by exposure to human airway epithelial cells	10.48	0.3839	1	4	4	4	112	12.1	7.25
Afu6g12300	Afu6g12300 AspGDID:ASPL0000109574 COORDS:Chr6_A_fumigatus_Af293:3095007-3092936C, translated using codon table 1 (478 amino acids) Verified ORF; RNP domain protein; conidia-enriched protein	3.46	0.1276	1	3	5	5	478	51.7	9.55
Afu6g12340	Afu6g12340 AspGDID:ASPL0000109578 COORDS:Chr6_A_fumigatus_Af293:3107392-3103528C, translated using codon table 1 (1266 amino acids) Uncharacterized ORF; Putative GTPase-activating protein; transcript upregulated in response to amphotericin B	0	0.1035	1	1	9	10	1266	142.1	7.61
Afu6g12500	Afu6g12500 AspGDID:ASPL0000109594 COORDS:Chr6_A_fumigatus_Af293:3156604-3155495C, translated using codon table 1 (220 amino acids) Uncharacterized ORF; Ortholog(s) have cytosol, mitochondrion, nucleus localization	2.07	0.25	1	2	4	5	220	23.7	8.38
Afu6g12580	Afu6g12580 AspGDID:ASPL0000109601 COORDS:Chr6_A_fumigatus_Af293:3181167-3179379C, translated using codon table 1 (517 amino acids) Uncharacterized ORF; Ortholog(s) have anthranilate synthase activity, role in cleistothecium development, tryptophan biosynthetic process and anthranilate synthase complex, cytosol, nucleus localization	0	0.0812	1	1	3	3	517	57	6.01
Afu6g12630	Afu6g12630 AspGDID:ASPL0000109606 COORDS:Chr6_A_fumigatus_Af293:3191249-3194824W, translated using codon table 1 (1127 amino acids) Uncharacterized ORF; Ortholog(s) have aminoacyl-tRNA editing activity, leucine-tRNA ligase activity, role in leucyl-tRNA aminoacylation, regulation of TOR signaling and cytosol localization	3.88	0.1766	1	3	15	15	1127	127.1	6.74
Afu6g12740	Afu6g12740 AspGDID:ASPL0000109617 COORDS:Chr6_A_fumigatus_Af293:3219940-3220875W, translated using codon table 1 (245 amino acids) Uncharacterized ORF; Dienelactone hydrolase family protein	3.9	0.3551	1	4	7	7	245	26.9	6.64
Afu6g12800	Afu6g12800 AspGDID:ASPL0000109623 COORDS:Chr6_A_fumigatus_Af293:3230894-3232059W, translated using codon table 1 (361 amino acids) Uncharacterized ORF; Ortholog(s) have uroporphyrinogen-III synthase activity, role in heme biosynthetic process and cytosol, nucleus localization	0	0.0803	1	1	2	3	361	38.9	6.92
Afu6g12820	mpkB AspGDID:ASPL0000109625 COORDS:Chr6_A_fumigatus_Af293:3233954-3232650C, translated using codon table 1 (353 amino acids) Uncharacterized ORF; Putative mitogen-activated protein kinase (MAPK)	1.8	0.0822	1	1	2	2	353	40.8	6.9
Afu6g12830	Afu6g12830 AspGDID:ASPL0000109626 COORDS:Chr6_A_fumigatus_Af293:3239903-3236895C, translated using codon table 1 (921 amino acids) Uncharacterized ORF; Ortholog(s) have cytosol, endoplasmic reticulum exit site localization	0	0.1216	1	1	8	8	921	100.5	6.76
Afu6g12930	acoA AspGDID:ASPL0000109636 COORDS:Chr6_A_fumigatus_Af293:3262693-3265559W, translated using codon table 1 (787 amino acids) Verified ORF; Mitochondrial aconitate hydratase; citric acid cycle enzyme; protein abundant in conidia; transcript induced in conidia exposed to neutrophils; reacts with rabbit immunosera exposed to A. fumigatus conidia; hypoxia induced	15.79	0.2745	1	9	15	17	787	85.5	6.71
Afu6g12990	Afu6g12990 AspGDID:ASPL0000109642 COORDS:Chr6_A_fumigatus_Af293:3280512-3279334C, translated using codon table 1 (263 amino acids) Uncharacterized ORF; Putative cytosolic large ribosomal subunit protein L7A	0	0.1825	1	2	5	5	263	29.4	10.26
Afu6g13250	Afu6g13250 AspGDID:ASPL0000109666 COORDS:Chr6_A_fumigatus_Af293:3354774-3355600W, translated using codon table 1 (123 amino acids) Uncharacterized ORF; 60S ribosomal protein L31e; transcript induced by exposure to human airway epithelial cells	2.53	0.2195	1	1	3	4	123	14	10.49
Afu6g13300	Afu6g13300 AspGDID:ASPL0000109671 COORDS:Chr6_A_fumigatus_Af293:3377042-3376007C, translated using codon table 1 (215 amino acids) Uncharacterized ORF; GTP-Binding nuclear protein Ran	7.16	0.1581	1	3	4	4	215	24.1	7.39
Afu6g13490	Afu6g13490 AspGDID:ASPL0000109690 COORDS:Chr6_A_fumigatus_Af293:3433612-3431912C, translated using codon table 1 (515 amino acids) Uncharacterized ORF; Putative glutamate decarboxylase; predicted gene pair with AFUA_8G06020; SrbA-regulated during hypoxia	1.97	0.1922	1	2	7	7	515	58.9	6.24
Afu6g13540	cp3 AspGDID:ASPL0000109695 COORDS:Chr6_A_fumigatus_Af293:3447061-3448745W, translated using codon table 1 (543 amino acids) Uncharacterized ORF; Carboxypeptidase Y; predicted signal sequence for secretion; transcript up-regulated in conidia exposed to neutrophils; induced by growth on BSA as a sole nitrogen source	1.75	0.1197	1	1	5	6	543	60.9	5.8
Afu6g13550	Afu6g13550 AspGDID:ASPL0000109696 COORDS:Chr6_A_fumigatus_Af293:3450087-3449278C, translated using codon table 1 (155 amino acids) Uncharacterized ORF; Ribosomal protein S13p/S18e	6.25	0.4	1	4	7	7	155	17.9	10.45
Afu6g13590	Afu6g13590 AspGDID:ASPL0000109700 COORDS:Chr6_A_fumigatus_Af293:3458850-3457625C, translated using codon table 1 (368 amino acids) Uncharacterized ORF; 3-isopropylmalate dehydrogenase; transcript up-regulated in conidia exposed to neutrophils	0	0.1495	1	1	2	3	368	39.7	5.49
Afu6g14460	Afu6g14460 AspGDID:ASPL0000109784 COORDS:Chr6_A_fumigatus_Af293:3677313-3676600C, translated using codon table 1 (237 amino acids) Uncharacterized ORF; 2-haloalkanoic acid dehalogenase; transcript up-regulated in conidia exposed to neutrophils	0	0.1055	1	1	2	2	237	26.7	6.68
Afu6g14470	Afu6g14470 AspGDID:ASPL0000109785 COORDS:Chr6_A_fumigatus_Af293:3678960-3678210C, translated using codon table 1 (234 amino acids) Uncharacterized ORF; Ortholog of <i>A. nidulans FGSC A4</i> : AN5353, <i>A. niger CBS 513.88</i> : An02g05680, <i>A. oryzae RIB40</i> : AO090103000108, <i>Aspergillus wentii</i> : Aspwe1_0131073 and <i>Aspergillus sydowii</i> : Aspsy1_0050268	0	0.0897	1	1	2	3	234	26	4.54
Afu7g00170	nscD AspGDID:ASPL0000109816 COORDS:Chr7_A_fumigatus_Af293:42071-43432W, translated using codon table 1 (453 amino acids) Verified ORF; Dimethylallyl tryptophan synthase; polycyclic prenyltransferase; encoded within the nsc/fcc secondary metabolite gene cluster; role in neosartoricin and fumicycline A biosynthesis; induced by contact with Streptomyces rapamycinicus	0	0.0949	1	1	2	3	453	50.9	7.14
Afu7g00760	Afu7g00760 AspGDID:ASPL0000109873 COORDS:Chr7_A_fumigatus_Af293:199110-199805W, translated using codon table 1 (231 amino acids) Uncharacterized ORF; Ortholog of <i>A. nidulans FGSC A4</i> : AN4348, <i>Neosartorya fischeri NRRL 181</i> : NFIA_113420, <i>Aspergillus wentii</i> : Aspwe1_0044898, Aspwe1_0655650 and <i>Aspergillus versicolor</i> : Aspve1_0085199	1.76	0.1385	1	1	2	3	231	25.6	5.68
Afu7g01460	Afu7g01460 AspGDID:ASPL0000109941 COORDS:Chr7_A_fumigatus_Af293:380737-379723C, translated using codon table 1 (259 amino acids) Uncharacterized ORF; Ribosomal protein S5	9.83	0.1931	1	4	4	5	259	28.3	10.54
Afu7g01510	Afu7g01510 AspGDID:ASPL0000109946 COORDS:Chr7_A_fumigatus_Af293:396163-397190W, translated using codon table 1 (279 amino acids) Uncharacterized ORF; Ortholog(s) have role in ascospore-type prospore membrane assembly and Golgi apparatus, hyphal tip, plasma membrane, prospore membrane localization	3.24	0.1111	1	1	2	2	279	31.3	5.63
Afu7g01830	ugp1 AspGDID:ASPL0000109978 COORDS:Chr7_A_fumigatus_Af293:488718-487183C, translated using codon table 1 (511 amino acids) Verified ORF; UTP-glucose-1-phosphate uridylyltransferase; induced by hydrogen peroxide; hypoxia repressed protein	6.41	0.3425	1	4	13	16	511	56.9	6.87
Afu7g01840	Afu7g01840 AspGDID:ASPL0000109979 COORDS:Chr7_A_fumigatus_Af293:496331-491364C, translated using codon table 1 (1522 amino acids) Uncharacterized ORF; Ortholog(s) have Golgi apparatus, cell tip, cytoplasmic vesicle, endoplasmic reticulum, plasma membrane localization	3.86	0.1413	1	3	14	14	1522	168.4	6.21
Afu7g01860	sti1 AspGDID:ASPL0000109981 COORDS:Chr7_A_fumigatus_Af293:501500-503455W, translated using codon table 1 (581 amino acids) Verified ORF; Putative heat shock protein; protein levels increase in response to amphotericin B; transcript induced by exposure to human airway epithelial cells; induced by gliotoxin exposure	0	0.2272	1	1	9	9	581	64.3	5.58
Afu7g02120	Afu7g02120 AspGDID:ASPL0000110007 COORDS:Chr7_A_fumigatus_Af293:569121-571346W, translated using codon table 1 (741 amino acids) Uncharacterized ORF; Ortholog of <i>A. nidulans FGSC A4</i> : AN11174, <i>A. niger CBS 513.88</i> : An12g00530, <i>A. oryzae RIB40</i> : AO090038000590, <i>Neosartorya fischeri NRRL 181</i> : NFIA_114850 and <i>Aspergillus wentii</i> : Aspwe1_0042354	0	0.1498	1	1	4	6	741	82.1	6.98
Afu7g02140	Afu7g02140 AspGDID:ASPL0000110009 COORDS:Chr7_A_fumigatus_Af293:573601-574445W, translated using codon table 1 (133 amino acids) Uncharacterized ORF; 40S ribosomal protein S24	0	0.1805	1	1	2	3	133	15.3	10.74
Afu7g02180	Afu7g02180 AspGDID:ASPL0000110013 COORDS:Chr7_A_fumigatus_Af293:584569-586235W, translated using codon table 1 (509 amino acids) Uncharacterized ORF; Ortholog(s) have UDP-N-acetylglucosamine diphosphorylase activity, role in UDP-N-acetylglucosamine biosynthetic process and cytosol, nucleus localization	2.08	0.1984	1	3	8	9	509	56.7	6.1
Afu7g02310	Afu7g02310 AspGDID:ASPL0000110026 COORDS:Chr7_A_fumigatus_Af293:629238-628529C, translated using codon table 1 (217 amino acids) Uncharacterized ORF; Putative adenine phosphoribosyltransferase 1; transcript induced by exposure to human airway epithelial cells; induced by gliotoxin exposure	0	0.2949	1	1	3	3	217	23.6	6.39
Afu7g02350	Afu7g02350 AspGDID:ASPL0000110030 COORDS:Chr7_A_fumigatus_Af293:640713-636395C, translated using codon table 1 (1362 amino acids) Uncharacterized ORF; Ortholog(s) have role in conidium formation, syncytium formation by plasma membrane fusion and cell division site, cell tip, cytosol localization	1.8	0.1601	1	1	13	16	1362	156.1	6.73
Afu7g03800	Afu7g03800 AspGDID:ASPL0000110075 COORDS:Chr7_A_fumigatus_Af293:840467-838652C, translated using codon table 1 (547 amino acids) Uncharacterized ORF; Ortholog of <i>A. nidulans FGSC A4</i> : AN4273, <i>A. niger CBS 513.88</i> : An13g00220, <i>A. oryzae RIB40</i> : AO090026000834, <i>Aspergillus wentii</i> : Aspwe1_0026252 and <i>Aspergillus sydowii</i> : Aspsy1_1088954	0	0.1737	1	1	6	6	547	61.8	8.06
Afu7g03980	Afu7g03980 AspGDID:ASPL0000110093 COORDS:Chr7_A_fumigatus_Af293:893752-895260W, translated using codon table 1 (468 amino acids) Uncharacterized ORF; Ortholog(s) have role in translational initiation and cytosol, eukaryotic 43S preinitiation complex, eukaryotic translation initiation factor 3 complex, eIF3m, nucleus localization	2.24	0.0919	1	2	4	4	468	51.1	5.06
Afu7g04210	Afu7g04210 AspGDID:ASPL0000110116 COORDS:Chr7_A_fumigatus_Af293:951859-952611W, translated using codon table 1 (161 amino acids) Uncharacterized ORF; Putative tropomyosin 1; protein induced by hydrogen peroxide; reacts with rabbit immunosera exposed to A. fumigatus conidia	1.84	0.4348	1	2	6	6	161	18.8	5.03
Afu7g04500	Afu7g04500 AspGDID:ASPL0000110143 COORDS:Chr7_A_fumigatus_Af293:1026112-1027349W, translated using codon table 1 (305 amino acids) Uncharacterized ORF; ATP phosphoribosyltransferase; role in histidine biosynthesis; no human homolog	1.94	0.0852	1	2	3	4	305	32.5	6.14
Afu7g04811	Afu7g04811 AspGDID:ASPL0000361449 COORDS:Chr7_A_fumigatus_Af293:1124259-1126477W, translated using codon table 1 (626 amino acids) Uncharacterized ORF; Has domain(s) with predicted DNA binding, zinc ion binding activity, role in transcription, DNA-templated and nucleus localization	0	0.2444	1	1	13	17	626	69.6	6.15
Afu7g05290	Afu7g05290 AspGDID:ASPL0000110222 COORDS:Chr7_A_fumigatus_Af293:1257190-1256242C, translated using codon table 1 (151 amino acids) Uncharacterized ORF; Cytosolic small ribosomal subunit S13/S15; transcript repressed by exposure to human airway epithelial cells	8.51	0.457	1	4	6	6	151	16.8	10.43
Afu7g05360	Afu7g05360 AspGDID:ASPL0000110229 COORDS:Chr7_A_fumigatus_Af293:1286156-1288281W, translated using codon table 1 (570 amino acids) Uncharacterized ORF; Ortholog(s) have role in cellular protein localization, cellular response to biotic stimulus, cellular response to cadmium ion, cellular response to starvation and chromatin silencing at centromere, <a href="#GOsection">more</a>	0	0.1842	1	1	6	6	570	63.7	4.73
Afu7g05430	Afu7g05430 AspGDID:ASPL0000110236 COORDS:Chr7_A_fumigatus_Af293:1307951-1304000C, translated using codon table 1 (1155 amino acids) Uncharacterized ORF; Ortholog(s) have role in mRNA stabilization, nuclear-transcribed mRNA catabolic process, nonsense-mediated decay and cytosol localization	0	0.0788	1	1	9	9	1155	130.9	5.29
Afu7g05450	sun1 AspGDID:ASPL0000110238 COORDS:Chr7_A_fumigatus_Af293:1314669-1313311C, translated using codon table 1 (414 amino acids) Verified ORF; Novel beta-1,3-glucan modifying enzyme involved in fungal morphogenesis	2.04	0.1087	1	1	2	2	414	43.5	5.48
Afu7g05510	Afu7g05510 AspGDID:ASPL0000110244 COORDS:Chr7_A_fumigatus_Af293:1330274-1332531W, translated using codon table 1 (686 amino acids) Uncharacterized ORF; Ortholog(s) have DNA binding, DNA translocase activity	2.03	0.0758	1	1	5	5	686	74.6	5.1
Afu7g05660	Afu7g05660 AspGDID:ASPL0000110259 COORDS:Chr7_A_fumigatus_Af293:1376127-1379437W, translated using codon table 1 (1065 amino acids) Uncharacterized ORF; Putative translation elongation factor eEF-3; protein induced by heat shock and hypoxia	14.29	0.1991	1	9	17	17	1065	117.7	6.18
Afu7g05720	Afu7g05720 AspGDID:ASPL0000110264 COORDS:Chr7_A_fumigatus_Af293:1398605-1400277W, translated using codon table 1 (485 amino acids) Uncharacterized ORF; Pyruvate dehydrogenase complex, dihydrolipoamide acetyltransferase component; hypoxia induced protein	5.91	0.3093	1	2	9	9	485	52	6.68
Afu7g05740	Afu7g05740 AspGDID:ASPL0000110266 COORDS:Chr7_A_fumigatus_Af293:1404497-1405787W, translated using codon table 1 (340 amino acids) Verified ORF; Putative NAD-dependent malate dehydrogenase; protein abundant in conidia; immunoreactive; reacts with rabbit immunosera exposed to A. fumigatus conidia; induced by L-tyrosine; transcript downregulated in response to hypoxia	6.98	0.1353	1	3	5	5	340	35.9	9.09
Afu7g05920	Afu7g05920 AspGDID:ASPL0000110284 COORDS:Chr7_A_fumigatus_Af293:1449832-1451264W, translated using codon table 1 (456 amino acids) Uncharacterized ORF; Ortholog(s) have stearoyl-CoA 9-desaturase activity	0	0.1272	1	1	3	3	456	51.9	9.1
Afu7g05930	mepB AspGDID:ASPL0000110285 COORDS:Chr7_A_fumigatus_Af293:1452895-1455148W, translated using codon table 1 (716 amino acids) Verified ORF; Putative metallopeptidase with similarity to mammalian thimet oligopeptidases; conidia-enriched protein; transcript induced by exposure to human airway epithelial cells and by growth on BSA as a sole nitrogen source	3.3	0.2039	1	2	12	14	716	81.9	5.78
Afu7g05950	Afu7g05950 AspGDID:ASPL0000110287 COORDS:Chr7_A_fumigatus_Af293:1457344-1456348C, translated using codon table 1 (139 amino acids) Uncharacterized ORF; Ortholog(s) have calcium ion binding activity and role in actomyosin contractile ring assembly actin filament organization, protein localization to medial cortex, regulation of cell cycle, spore germination	7.21	0.482	1	4	6	6	139	15.4	4.59
Afu7g06610	Afu7g06610 AspGDID:ASPL0000110351 COORDS:Chr7_A_fumigatus_Af293:1610600-1609738C, translated using codon table 1 (237 amino acids) Uncharacterized ORF; Has domain(s) with predicted catalytic activity and role in metabolic process	2.84	0.2574	1	2	4	4	237	25.1	7.24
Afu7g06680	aaaA AspGDID:ASPL0000110358 COORDS:Chr7_A_fumigatus_Af293:1626768-1628757W, translated using codon table 1 (631 amino acids) Uncharacterized ORF; AAA-family ATPase	0	0.0602	1	1	2	2	631	71.7	5.55
Afu7g06780	Afu7g06780 AspGDID:ASPL0000110368 COORDS:Chr7_A_fumigatus_Af293:1648499-1649833W, translated using codon table 1 (374 amino acids) Uncharacterized ORF; Has domain(s) with predicted oxidoreductase activity and role in oxidation-reduction process	8.63	0.2567	1	4	7	9	374	41.5	7.43
Afu7g06800	Afu7g06800 AspGDID:ASPL0000110370 COORDS:Chr7_A_fumigatus_Af293:1655732-1653756C, translated using codon table 1 (493 amino acids) Uncharacterized ORF; Has domain(s) with predicted carbon-nitrogen ligase activity, with glutamine as amido-N-donor activity	1.71	0.0953	1	2	4	4	493	53.4	5.88
Afu7g06810	Afu7g06810 AspGDID:ASPL0000110371 COORDS:Chr7_A_fumigatus_Af293:1658865-1656772C, translated using codon table 1 (697 amino acids) Uncharacterized ORF; Has domain(s) with predicted oxidoreductase activity and role in oxidation-reduction process	14.89	0.2109	1	5	11	13	697	78.5	6.51
Afu8g01580	Afu8g01580 AspGDID:ASPL0000110597 COORDS:Chr8_A_fumigatus_Af293:405654-407154W, translated using codon table 1 (389 amino acids) Uncharacterized ORF; Has domain(s) with predicted catalytic activity, pyridoxal phosphate binding activity and role in biosynthetic process	0	0.0746	1	1	2	2	389	42.9	5.78
Afu8g01670	cat2 AspGDID:ASPL0000110606 COORDS:Chr8_A_fumigatus_Af293:441545-439266C, translated using codon table 1 (759 amino acids) Verified ORF; Putative bifunctional catalase-peroxidase; induction in response to hydrogen peroxide Yap1-dependent; transcript induced by exposure to human airway epithelial cells; SrbA-regulated during hypoxia	2.39	0.112	1	3	6	7	759	83.7	6.58
Afu8g02620	Afu8g02620 AspGDID:ASPL0000110698 COORDS:Chr8_A_fumigatus_Af293:695141-693100C, translated using codon table 1 (607 amino acids) Uncharacterized ORF; Ortholog of <i>A. nidulans FGSC A4</i> : AN10344, <i>A. niger CBS 513.88</i> : An03g06730, <i>A. oryzae RIB40</i> : AO090010000752, <i>Neosartorya fischeri NRRL 181</i> : NFIA_096330 and <i>Aspergillus wentii</i> : Aspwe1_0033226	5.31	0.2175	1	5	11	11	607	68.9	4.65
Afu8g02840	Afu8g02840 AspGDID:ASPL0000110720 COORDS:Chr8_A_fumigatus_Af293:771371-768813C, translated using codon table 1 (800 amino acids) Uncharacterized ORF; Putative mitochondrial dynamin GTPase with a predicted role in mitochondrial fission	1.81	0.13	1	1	10	10	800	89.2	6.65
Afu8g02850	Afu8g02850 AspGDID:ASPL0000110721 COORDS:Chr8_A_fumigatus_Af293:774863-772299C, translated using codon table 1 (780 amino acids) Uncharacterized ORF; Putative actin binding protein; transcript induced by exposure to human airway epithelial cells	0	0.0654	1	1	3	4	780	84.1	5.1
Afu8g03880	Afu8g03880 AspGDID:ASPL0000110724 COORDS:Chr8_A_fumigatus_Af293:825050-828378W, translated using codon table 1 (1011 amino acids) Uncharacterized ORF; Putative alanyl-tRNA synthetase; protein induced by hydrogen peroxide	0	0.2156	1	3	16	18	1011	113.6	6.48
Afu8g03930	hscA AspGDID:ASPL0000110728 COORDS:Chr8_A_fumigatus_Af293:839316-841607W, translated using codon table 1 (614 amino acids) Verified ORF; Putative Hsp70 chaperone; Yap1-dependent induction in response to hydrogen peroxide; hypoxia induced protein	12.4	0.2687	1	9	12	12	614	66.9	5.39
Afu8g04000	erg10B AspGDID:ASPL0000110735 COORDS:Chr8_A_fumigatus_Af293:855589-857056W, translated using codon table 1 (401 amino acids) Uncharacterized ORF; Putative acetyl-coenzyme A acetyltransferase; protein induced by hydrogen peroxide; higher expression in 48 h biofilm vs planktonic cells; SrbA-regulated during hypoxia	5.8	0.1247	1	2	5	6	401	41.2	6.87
Afu8g04340	Afu8g04340 AspGDID:ASPL0000110769 COORDS:Chr8_A_fumigatus_Af293:975505-974078C, translated using codon table 1 (412 amino acids) Uncharacterized ORF; Putative cystathionine gamma-lyase; transcript induced by exposure to human airway epithelial cells	3.87	0.1408	1	2	6	7	412	43.6	6.8
Afu8g04730	Afu8g04730 AspGDID:ASPL0000110807 COORDS:Chr8_A_fumigatus_Af293:1078214-1075934C, translated using codon table 1 (728 amino acids) Uncharacterized ORF; Oligopeptidase family protein	0	0.1456	1	1	6	6	728	79.9	6.15
Afu8g04810	Afu8g04810 AspGDID:ASPL0000110815 COORDS:Chr8_A_fumigatus_Af293:1104248-1103015C, translated using codon table 1 (336 amino acids) Uncharacterized ORF; Ortholog(s) have role in circadian regulation of gene expression, conidium formation, establishment or maintenance of bipolar cell polarity regulating cell shape and protein phosphorylation, <a href="#GOsection">more</a>	2.1	0.2679	1	2	5	5	336	39.5	7.31
Afu8g05320	Afu8g05320 AspGDID:ASPL0000110862 COORDS:Chr8_A_fumigatus_Af293:1239645-1241741W, translated using codon table 1 (556 amino acids) Verified ORF; Putative mitochondrial F1 ATPase subunit alpha; hypoxia induced protein	2.21	0.1349	1	2	6	6	556	59.9	9.07
Afu8g05520	Afu8g05520 AspGDID:ASPL0000110882 COORDS:Chr8_A_fumigatus_Af293:1289899-1291557W, translated using codon table 1 (487 amino acids) Uncharacterized ORF; Has domain(s) with predicted oxidoreductase activity, oxidoreductase activity, acting on the aldehyde or oxo group of donors, NAD or NADP as acceptor activity and role in oxidation-reduction process	0	0.0411	1	1	2	2	487	51.5	6.09
Afu8g05560	Afu8g05560 AspGDID:ASPL0000110885 COORDS:Chr8_A_fumigatus_Af293:1298493-1300419W, translated using codon table 1 (471 amino acids) Uncharacterized ORF; Ortholog(s) have protein serine/threonine phosphatase activity	5.12	0.1507	1	2	5	6	471	53.3	6.3
Afu8g05610	btgE AspGDID:ASPL0000110890 COORDS:Chr8_A_fumigatus_Af293:1318148-1320231W, translated using codon table 1 (616 amino acids) Uncharacterized ORF; Putative cell wall glucanase	0	0.0682	1	1	5	6	616	63.6	5.64
Afu8g06050	Afu8g06050 AspGDID:ASPL0000110935 COORDS:Chr8_A_fumigatus_Af293:1436344-1437671W, translated using codon table 1 (420 amino acids) Uncharacterized ORF; Has domain(s) with predicted oxidoreductase activity and role in metabolic process	0	0.1571	1	1	5	7	420	46.2	6.71

## Sheet: Wild-type 24 hs_3
Acession	Description	Score	Coverage	# Proteins	#Unique Peptides	#Peptides	#PSMs	#Aas	MW kDa	calc. pI
Afu1g00310	Afu1g00310 AspGDID:ASPL0000101203 COORDS:Chr1_A_fumigatus_Af293:85698-84231C, translated using codon table 1 (430 amino acids) Uncharacterized ORF; Ortholog(s) have chitinase activity and role in chitin catabolic process	0	0.1349	1	1	2	2	430	46.8	5.19
Afu1g02190	rab11 AspGDID:ASPL0000101389 COORDS:Chr1_A_fumigatus_Af293:648599-649525W, translated using codon table 1 (210 amino acids) Uncharacterized ORF; Ras GTPase; hypoxia repressed protein	0	0.1476	1	1	2	2	210	23.3	5.68
Afu1g02290	Afu1g02290 AspGDID:ASPL0000101399 COORDS:Chr1_A_fumigatus_Af293:670312-669933C, translated using codon table 1 (106 amino acids) Uncharacterized ORF; Protein of unknown function; calcium downregulated	3.99	0.2925	1	2	2	3	106	11.8	4.58
Afu1g02550	Afu1g02550 AspGDID:ASPL0000101425 COORDS:Chr1_A_fumigatus_Af293:746335-744583C, translated using codon table 1 (448 amino acids) Uncharacterized ORF; Tubulin alpha-1 subunit; gene pair with AFUA_2G14990 (tubulin alpha-2 subunit)	9.36	0.2165	1	4	6	8	448	50	5.1
Afu1g02670	Afu1g02670 AspGDID:ASPL0000101437 COORDS:Chr1_A_fumigatus_Af293:776882-775673C, translated using codon table 1 (320 amino acids) Uncharacterized ORF; ARP2/3 complex 34 kDa subunit; hypoxia induced protein	0	0.075	1	1	2	2	320	36.9	6.87
Afu1g02830	Afu1g02830 AspGDID:ASPL0000101453 COORDS:Chr1_A_fumigatus_Af293:811363-813531W, translated using codon table 1 (652 amino acids) Uncharacterized ORF; Ortholog(s) have role in ER-associated misfolded protein catabolic process and cytoplasm-associated proteasomal ubiquitin-dependent protein catabolic process, <a href="#GOsection">more</a>	0	0.1304	1	1	5	5	652	73	6.8
Afu1g02980	Afu1g02980 AspGDID:ASPL0000101468 COORDS:Chr1_A_fumigatus_Af293:854826-855623W, translated using codon table 1 (265 amino acids) Uncharacterized ORF; Putative 6-phosphogluconolactonase; calcium downregulated	1.64	0.1736	1	1	2	2	265	28.8	6.28
Afu1g03390	Afu1g03390 AspGDID:ASPL0000101509 COORDS:Chr1_A_fumigatus_Af293:988367-987625C, translated using codon table 1 (165 amino acids) Uncharacterized ORF; Putative 60S ribosomal protein L12	6.06	0.3939	1	3	5	5	165	17.9	9.55
Afu1g03970	Afu1g03970 AspGDID:ASPL0000101567 COORDS:Chr1_A_fumigatus_Af293:1147911-1144571C, translated using codon table 1 (1068 amino acids) Verified ORF; Putative mitochondrial translation initiation factor IF-2	0	0.1395	1	1	11	16	1068	118.6	6.14
Afu1g04070	Afu1g04070 AspGDID:ASPL0000101576 COORDS:Chr1_A_fumigatus_Af293:1161707-1160930C, translated using codon table 1 (157 amino acids) Uncharacterized ORF; Eukaryotic initiation factor 5A; Yap1-dependent induction in response to hydrogen peroxide	2.16	0.7006	1	3	6	8	157	17.2	5.4
Afu1g04320	Afu1g04320 AspGDID:ASPL0000101600 COORDS:Chr1_A_fumigatus_Af293:1226288-1226942W, translated using codon table 1 (201 amino acids) Uncharacterized ORF; Ribosomal protein S8	3.02	0.1393	1	1	2	2	201	22.8	11.18
Afu1g04430	Afu1g04430 AspGDID:ASPL0000101611 COORDS:Chr1_A_fumigatus_Af293:1258607-1259881W, translated using codon table 1 (424 amino acids) Uncharacterized ORF; Ortholog of <i>A. nidulans FGSC A4</i> : AN10090, <i>A. oryzae RIB40</i> : AO090003000908, <i>Neosartorya fischeri NRRL 181</i> : NFIA_020340, <i>Aspergillus wentii</i> : Aspwe1_0169406 and <i>Aspergillus clavatus NRRL 1</i> : ACLA_030470	0	0.1863	1	1	4	4	424	45.8	9.72
Afu1g04530	Afu1g04530 AspGDID:ASPL0000101621 COORDS:Chr1_A_fumigatus_Af293:1282636-1283216W, translated using codon table 1 (148 amino acids) Uncharacterized ORF; Ribosomal L18ae protein family	1.86	0.1149	1	2	2	2	148	17.4	10.7
Afu1g04540	Afu1g04540 AspGDID:ASPL0000101622 COORDS:Chr1_A_fumigatus_Af293:1284032-1285205W, translated using codon table 1 (323 amino acids) Uncharacterized ORF; NADH-cytochrome b5 reductase involved in oxidative phosphorylation; hypoxia induced protein; induced by exposure to artemisinin	0	0.1393	1	2	4	4	323	36.2	9.04
Afu1g04660	Afu1g04660 AspGDID:ASPL0000101635 COORDS:Chr1_A_fumigatus_Af293:1318902-1317870C, translated using codon table 1 (203 amino acids) Uncharacterized ORF; Ribosomal protein L15	0	0.3202	1	3	6	8	203	24.2	11.3
Afu1g04820	Afu1g04820 AspGDID:ASPL0000101651 COORDS:Chr1_A_fumigatus_Af293:1367321-1366072C, translated using codon table 1 (350 amino acids) Uncharacterized ORF; D-xylose reductase	0	0.1314	1	1	4	4	350	39.8	6.55
Afu1g04900	Afu1g04900 AspGDID:ASPL0000101659 COORDS:Chr1_A_fumigatus_Af293:1389643-1388632C, translated using codon table 1 (258 amino acids) Uncharacterized ORF; Proliferating cell nuclear antigen (PCNA); conidia-enriched protein	0	0.2713	1	1	5	5	258	28.3	4.72
Afu1g04940	Afu1g04940 AspGDID:ASPL0000101663 COORDS:Chr1_A_fumigatus_Af293:1408563-1409639W, translated using codon table 1 (189 amino acids) Uncharacterized ORF; Ortholog(s) have GTP binding, GTPase activity	3.87	0.2169	1	3	3	3	189	21.4	6.42
Afu1g04950	glcA AspGDID:ASPL0000101664 COORDS:Chr1_A_fumigatus_Af293:1412013-1410732C, translated using codon table 1 (323 amino acids) Uncharacterized ORF; Ortholog(s) have protein serine/threonine phosphatase activity	1.93	0.322	1	6	7	9	323	37.1	5.78
Afu1g05080	Afu1g05080 AspGDID:ASPL0000101677 COORDS:Chr1_A_fumigatus_Af293:1454060-1455134W, translated using codon table 1 (313 amino acids) Uncharacterized ORF; Putative 60S ribosomal protein P0; reacts with rabbit immunosera exposed to A. fumigatus conidia	8.27	0.2236	1	4	5	5	313	33.5	5.21
Afu1g05320	Afu1g05320 AspGDID:ASPL0000101700 COORDS:Chr1_A_fumigatus_Af293:1534715-1533151C, translated using codon table 1 (478 amino acids) Uncharacterized ORF; Has domain(s) with predicted electron carrier activity, protein disulfide oxidoreductase activity and role in cell redox homeostasis, glycerol ether metabolic process	0	0.0732	1	1	3	3	478	51.3	5.91
Afu1g05390	Afu1g05390 AspGDID:ASPL0000101707 COORDS:Chr1_A_fumigatus_Af293:1549201-1548016C, translated using codon table 1 (308 amino acids) Uncharacterized ORF; Ortholog(s) have ATP:ADP antiporter activity	0	0.0714	1	1	3	3	308	33.3	9.96
Afu1g05630	Afu1g05630 AspGDID:ASPL0000101731 COORDS:Chr1_A_fumigatus_Af293:1617319-1616207C, translated using codon table 1 (266 amino acids) Uncharacterized ORF; 40S ribosomal protein S3	12.38	0.2895	1	4	6	7	266	29.2	9.1
Afu1g05770	exg12 AspGDID:ASPL0000101746 COORDS:Chr1_A_fumigatus_Af293:1663147-1666206W, translated using codon table 1 (863 amino acids) Verified ORF; Secreted beta-glucosidase; predicted secretory signal sequence; fibrinogen-binding	0	0.044	1	1	3	3	863	93.6	5.17
Afu1g05990	Afu1g05990 AspGDID:ASPL0000101768 COORDS:Chr1_A_fumigatus_Af293:1728875-1727904C, translated using codon table 1 (202 amino acids) Uncharacterized ORF; Ribosomal protein L16a	1.77	0.1238	1	1	4	6	202	23.1	10.51
Afu1g06160	Afu1g06160 AspGDID:ASPL0000101784 COORDS:Chr1_A_fumigatus_Af293:1779425-1781824W, translated using codon table 1 (778 amino acids) Uncharacterized ORF; Ortholog of <i>A. nidulans FGSC A4</i> : AN4237, <i>A. niger CBS 513.88</i> : An18g05340, <i>A. oryzae RIB40</i> : AO090001000437, <i>Aspergillus wentii</i> : Aspwe1_0026108 and <i>Aspergillus sydowii</i> : Aspsy1_0153979	0	0.1028	1	1	4	4	778	85.8	8
Afu1g06190	rmtA AspGDID:ASPL0000101787 COORDS:Chr1_A_fumigatus_Af293:1789312-1787900C, translated using codon table 1 (353 amino acids) Uncharacterized ORF; Histone H4 arginine methyltransferase	0	0.2493	1	2	5	5	353	40.3	5.27
Afu1g06300	Afu1g06300 AspGDID:ASPL0000101798 COORDS:Chr1_A_fumigatus_Af293:1808539-1809878W, translated using codon table 1 (424 amino acids) Uncharacterized ORF; Ortholog(s) have cytosol, nucleus localization	1.66	0.217	1	2	6	6	424	47.6	5.41
Afu1g06340	Afu1g06340 AspGDID:ASPL0000101802 COORDS:Chr1_A_fumigatus_Af293:1821569-1822486W, translated using codon table 1 (186 amino acids) Uncharacterized ORF; Putative 60S ribosomal protein L27	0	0.3602	1	2	6	6	186	21.4	10.49
Afu1g06350	Afu1g06350 AspGDID:ASPL0000101803 COORDS:Chr1_A_fumigatus_Af293:1825451-1826091W, translated using codon table 1 (187 amino acids) Uncharacterized ORF; Ortholog of <i>A. nidulans FGSC A4</i> : AN10518, <i>A. niger CBS 513.88</i> : An18g05000, <i>A. oryzae RIB40</i> : AO090001000412, <i>Neosartorya fischeri NRRL 181</i> : NFIA_018360 and <i>Aspergillus wentii</i> : Aspwe1_0038230	3.77	0.1818	1	2	2	2	187	20.4	7.03
Afu1g06390	tef1 AspGDID:ASPL0000101807 COORDS:Chr1_A_fumigatus_Af293:1831593-1833461W, translated using codon table 1 (494 amino acids) Verified ORF; Putative translation elongation factor EF-1 alpha subunit; protein abundant in conidia; protein induced by heat shock	34.05	0.4636	1	13	17	23	494	53.8	9.1
Afu1g06580	hel10 AspGDID:ASPL0000101826 COORDS:Chr1_A_fumigatus_Af293:1886083-1885383C, translated using codon table 1 (207 amino acids) Uncharacterized ORF; Ortholog of <i>A. nidulans FGSC A4</i> : AN4252, AN10165, <i>A. fumigatus Af293</i> : Afu1g11910, <i>A. niger CBS 513.88</i> : An18g05640, An08g04120 and <i>A. oryzae RIB40</i> : AO090001000456, AO090001000373	2.07	0.4058	1	2	3	3	207	21.8	6.89
Afu1g06770	Afu1g06770 AspGDID:ASPL0000101845 COORDS:Chr1_A_fumigatus_Af293:1933600-1932735C, translated using codon table 1 (119 amino acids) Uncharacterized ORF; 40S ribosomal protein S26	0	0.2353	1	1	2	2	119	13.5	10.87
Afu1g06820	Afu1g06820 AspGDID:ASPL0000101850 COORDS:Chr1_A_fumigatus_Af293:1947751-1945964C, translated using codon table 1 (438 amino acids) Verified ORF; Protein of unknown function identified by mass spectrometry; transcript up-regulated in conidia exposed to neutrophils	0	0.2009	1	1	5	5	438	50.2	5.47
Afu1g06830	rpp1 AspGDID:ASPL0000101851 COORDS:Chr1_A_fumigatus_Af293:1948201-1948863W, translated using codon table 1 (111 amino acids) Uncharacterized ORF; Putative 60s acidic ribosomal protein superfamily member; putative ribosomal stalk protein	4.48	0.2072	1	2	2	2	111	11.1	4.17
Afu1g06960	Afu1g06960 AspGDID:ASPL0000101864 COORDS:Chr1_A_fumigatus_Af293:1985804-1987045W, translated using codon table 1 (370 amino acids) Uncharacterized ORF; Putative pyruvate dehydrogenase complex subunit alpha; protein induced by hydrogen peroxide; hypoxia induced protein	6.05	0.2892	1	5	9	10	370	41.5	6.8
Afu1g07380	Afu1g07380 AspGDID:ASPL0000101904 COORDS:Chr1_A_fumigatus_Af293:2090929-2084331C, translated using codon table 1 (2126 amino acids) Uncharacterized ORF; Putative NADH-dependent glutamate synthase; transcript induced during conidial germination; transcript up-regulated in conidia exposed to neutrophils; SrbA-regulated during hypoxia	2.23	0.1242	1	3	17	17	2126	234.1	6.39
Afu1g07440	hsp70 AspGDID:ASPL0000101909 COORDS:Chr1_A_fumigatus_Af293:2102587-2104621W, translated using codon table 1 (638 amino acids) Verified ORF; Molecular chaperone; conidia-enriched protein	58.69	0.6176	1	24	31	38	638	69.6	5.17
Afu1g07530	Afu1g07530 AspGDID:ASPL0000101918 COORDS:Chr1_A_fumigatus_Af293:2122230-2121254C, translated using codon table 1 (257 amino acids) Uncharacterized ORF; Ortholog(s) have adenylate kinase activity, role in ADP biosynthetic process, DNA replication initiation and cytosol, mitochondrial intermembrane space, mitochondrial outer membrane, nucleus localization	5.11	0.1051	1	2	2	2	257	28.7	7.88
Afu1g07540	Afu1g07540 AspGDID:ASPL0000101919 COORDS:Chr1_A_fumigatus_Af293:2122943-2124145W, translated using codon table 1 (350 amino acids) Uncharacterized ORF; Ortholog(s) have role in cellular response to drug and nuclear envelope, proteasome regulatory particle, lid subcomplex, proteasome storage granule localization	2.72	0.24	1	1	4	4	350	39	6.01
Afu1g08790	Afu1g08790 AspGDID:ASPL0000101945 COORDS:Chr1_A_fumigatus_Af293:2260124-2263969W, translated using codon table 1 (1072 amino acids) Uncharacterized ORF; Ortholog(s) have nuclear export signal receptor activity	0	0.1026	1	1	7	7	1072	123.4	5.44
Afu1g08850	aspD AspGDID:ASPL0000101951 COORDS:Chr1_A_fumigatus_Af293:2293812-2292464C, translated using codon table 1 (346 amino acids) Verified ORF; Septin; localizes to long tubular structures within hyphae and to newly formed septa; repressed by exposure to artemisinin	4.77	0.2254	1	3	5	5	346	39.2	7.84
Afu1g08980	myg1 AspGDID:ASPL0000101964 COORDS:Chr1_A_fumigatus_Af293:2329322-2330501W, translated using codon table 1 (373 amino acids) Uncharacterized ORF; UPF0160 domain protein	0	0.1796	1	1	4	5	373	41.2	6.57
Afu1g09020	Afu1g09020 AspGDID:ASPL0000101968 COORDS:Chr1_A_fumigatus_Af293:2336543-2337699W, translated using codon table 1 (363 amino acids) Uncharacterized ORF; Ortholog(s) have role in poly(A)+ mRNA export from nucleus, regulation of G2/M transition of mitotic cell cycle and nuclear periphery, nuclear pore localization	0	0.0826	1	1	2	2	363	39.8	7.71
Afu1g09100	Afu1g09100 AspGDID:ASPL0000101976 COORDS:Chr1_A_fumigatus_Af293:2363153-2364329W, translated using codon table 1 (192 amino acids) Uncharacterized ORF; 60S ribosomal protein L9	2.7	0.2708	1	4	4	4	192	21.8	9.67
Afu1g09130	Afu1g09130 AspGDID:ASPL0000101979 COORDS:Chr1_A_fumigatus_Af293:2372730-2370383C, translated using codon table 1 (725 amino acids) Verified ORF; Protein of unknown function identified by mass spectrometry	0	0.0483	1	1	2	3	725	80.7	8.22
Afu1g09330	Afu1g09330 AspGDID:ASPL0000101999 COORDS:Chr1_A_fumigatus_Af293:2420356-2421522W, translated using codon table 1 (345 amino acids) Uncharacterized ORF; Ortholog(s) have sequence-specific DNA binding activity and role in translational initiation	0	0.0667	1	1	2	2	345	37.2	4.88
Afu1g09440	rps23 AspGDID:ASPL0000102010 COORDS:Chr1_A_fumigatus_Af293:2441556-2442180W, translated using codon table 1 (145 amino acids) Uncharacterized ORF; 40S ribosomal protein S23	4.64	0.2621	1	2	2	2	145	15.9	10.45
Afu1g09550	Afu1g09550 AspGDID:ASPL0000102021 COORDS:Chr1_A_fumigatus_Af293:2468785-2469303W, translated using codon table 1 (143 amino acids) Uncharacterized ORF; Ortholog(s) have role in dynein-driven meiotic oscillatory nuclear movement, karyogamy involved in conjugation with cellular fusion, reciprocal meiotic recombination	1.71	0.1958	1	1	2	3	143	15.3	5.45
Afu1g09800	Afu1g09800 AspGDID:ASPL0000102046 COORDS:Chr1_A_fumigatus_Af293:2543871-2545480W, translated using codon table 1 (394 amino acids) Uncharacterized ORF; Ortholog of S. cerevisiae OLA1; snoRNA Afu-304 encoded within intron 2	0	0.2995	1	1	6	6	394	43.5	7.81
Afu1g09830	Afu1g09830 AspGDID:ASPL0000102049 COORDS:Chr1_A_fumigatus_Af293:2550807-2551983W, translated using codon table 1 (348 amino acids) Uncharacterized ORF; Ortholog(s) have protein complex scaffold activity, role in posttranslational protein targeting to membrane, response to heat and TRC complex, nucleus localization	2.66	0.1897	1	1	6	6	348	36.3	5.02
Afu1g10130	Afu1g10130 AspGDID:ASPL0000102077 COORDS:Chr1_A_fumigatus_Af293:2611841-2610281C, translated using codon table 1 (446 amino acids) Uncharacterized ORF; Putative adenosylhomocysteinase; protein induced by heat shock	18.81	0.37	1	12	13	15	446	48.5	6.21
Afu1g10150	Afu1g10150 AspGDID:ASPL0000102079 COORDS:Chr1_A_fumigatus_Af293:2615038-2614068C, translated using codon table 1 (275 amino acids) Uncharacterized ORF; Ortholog of <i>A. nidulans FGSC A4</i> : AN3975, AN9193/llmJ, AN2891 and <i>A. fumigatus Af293</i> : Afu2g04380, Afu3g15150, Afu3g15280, Afu6g03300	0	0.1891	1	1	3	3	275	30.7	6.8
Afu1g10350	pgkA AspGDID:ASPL0000102099 COORDS:Chr1_A_fumigatus_Af293:2666254-2667669W, translated using codon table 1 (417 amino acids) Verified ORF; Putative phosphoglycerate kinase; reacts with rabbit immunosera exposed to conidia; hypoxia induced protein; transcript up-regulated in conidia exposed to neutrophils; induced by gliotoxin exposure	14.5	0.5755	1	10	19	23	417	44.7	6.74
Afu1g10380	nrps1 AspGDID:ASPL0000102102 COORDS:Chr1_A_fumigatus_Af293:2694887-2675699C, translated using codon table 1 (6247 amino acids) Verified ORF; Non-ribosomal peptide synthetase (NRPS); essential for fumigaclavine C biosynthesis; mutant displays altered conidial surface morphology and hydrophilicity	2.11	0.1037	1	3	34	36	6247	694.6	5.95
Afu1g10510	Afu1g10510 AspGDID:ASPL0000102115 COORDS:Chr1_A_fumigatus_Af293:2736183-2737182W, translated using codon table 1 (186 amino acids) Uncharacterized ORF; 60S ribosomal protein L35	0	0.0699	1	2	2	2	186	21.2	10.74
Afu1g10630	Afu1g10630 AspGDID:ASPL0000102127 COORDS:Chr1_A_fumigatus_Af293:2776408-2774958C, translated using codon table 1 (387 amino acids) Uncharacterized ORF; Putative S-adenosylmethionine synthetase; higher expression in 48 h biofilm vs planktonic cells; hypoxia induced protein	7.51	0.2687	1	4	7	7	387	42.2	6.01
Afu1g10910	tubA AspGDID:ASPL0000102154 COORDS:Chr1_A_fumigatus_Af293:2850137-2848155C, translated using codon table 1 (466 amino acids) Uncharacterized ORF; Beta-tubulin; predicted gene pair with AFUA_7G00250 (tubulin beta-2 subunit); protein induced by hydrogen peroxide	14.44	0.2124	1	4	8	9	466	51.8	4.87
Afu1g11130	Afu1g11130 AspGDID:ASPL0000102176 COORDS:Chr1_A_fumigatus_Af293:2932858-2933809W, translated using codon table 1 (200 amino acids) Uncharacterized ORF; 60S ribosomal protein L6	1.91	0.39	1	4	7	8	200	22.4	10.15
Afu1g11190	Afu1g11190 AspGDID:ASPL0000102182 COORDS:Chr1_A_fumigatus_Af293:2947142-2948249W, translated using codon table 1 (227 amino acids) Verified ORF; Putative eukaryotic translation elongation factor 1 subunit eEF1-beta; reacts with rabbit immunosera exposed to A. fumigatus conidia; induced by gliotoxin exposure	13.23	0.3524	1	6	7	7	227	25.2	4.55
Afu1g11480	Afu1g11480 AspGDID:ASPL0000102211 COORDS:Chr1_A_fumigatus_Af293:3031787-3030921C, translated using codon table 1 (168 amino acids) Uncharacterized ORF; Protein of unknown function; transcript up-regulated in conidia exposed to neutrophils	0	0.256	1	2	2	2	168	18.2	5.53
Afu1g11550	Afu1g11550 AspGDID:ASPL0000102219 COORDS:Chr1_A_fumigatus_Af293:3049138-3050658W, translated using codon table 1 (426 amino acids) Uncharacterized ORF; Has domain(s) with predicted kinase activity, transferase activity, transferring phosphorus-containing groups activity and role in glycerophospholipid biosynthetic process	1.8	0.2113	1	3	7	7	426	48.6	5.83
Afu1g11710	Afu1g11710 AspGDID:ASPL0000102235 COORDS:Chr1_A_fumigatus_Af293:3080890-3079981C, translated using codon table 1 (217 amino acids) Uncharacterized ORF; Ribosomal protein L1	5.04	0.1935	1	2	3	3	217	24.2	9.86
Afu1g11730	Afu1g11730 AspGDID:ASPL0000102237 COORDS:Chr1_A_fumigatus_Af293:3087288-3088069W, translated using codon table 1 (183 amino acids) Uncharacterized ORF; Ortholog(s) have GTPase activity, role in ER to Golgi vesicle-mediated transport, Golgi to plasma membrane transport, cellular response to drug, macroautophagy and Golgi apparatus, glyoxysome localization	5.39	0.5574	1	3	7	8	183	21	5.71
Afu1g12170	Afu1g12170 AspGDID:ASPL0000102283 COORDS:Chr1_A_fumigatus_Af293:3214725-3216299W, translated using codon table 1 (440 amino acids) Uncharacterized ORF; Putative translation elongation factor EF-Tu; hypoxia induced protein	4.55	0.3114	1	7	10	11	440	48.3	7.18
Afu1g12500	Afu1g12500 AspGDID:ASPL0000102318 COORDS:Chr1_A_fumigatus_Af293:3291783-3292387W, translated using codon table 1 (101 amino acids) Uncharacterized ORF; Ortholog of <i>Aspergillus fumigatus A1163</i> : AFUB_011970	0	0.4653	1	1	2	2	101	11.9	6.1
Afu1g12610	hsp88 AspGDID:ASPL0000102329 COORDS:Chr1_A_fumigatus_Af293:3331407-3333764W, translated using codon table 1 (714 amino acids) Uncharacterized ORF; Hsp70 chaperone; conidia-enriched protein; induction in response to hydrogen peroxide Yap1-dependent	10.65	0.2787	1	8	15	16	714	80	5.17
Afu1g12800	Afu1g12800 AspGDID:ASPL0000102348 COORDS:Chr1_A_fumigatus_Af293:3382593-3384187W, translated using codon table 1 (385 amino acids) Uncharacterized ORF; Putative NADPH isocitrate dehydrogenase; transcript induced during conidial germination	5.82	0.3403	1	4	10	10	385	41.7	8.51
Afu1g12840	niiA AspGDID:ASPL0000102352 COORDS:Chr1_A_fumigatus_Af293:3393418-3397198W, translated using codon table 1 (1102 amino acids) Uncharacterized ORF; Putative nitrite reductase; nitrogen-regulated gene, used as a conditional promoter; protein induced by heat shock; transcript downregulated in response to voriconazole	0	0.0926	1	2	7	7	1102	123.1	6.62
Afu1g12890	Afu1g12890 AspGDID:ASPL0000102357 COORDS:Chr1_A_fumigatus_Af293:3406505-3407674W, translated using codon table 1 (300 amino acids) Uncharacterized ORF; Putative 60S Ribosomal protein L5	6.47	0.3867	1	8	9	10	300	34.8	8.94
Afu1g13090	Afu1g13090 AspGDID:ASPL0000102377 COORDS:Chr1_A_fumigatus_Af293:3472871-3470577C, translated using codon table 1 (764 amino acids) Uncharacterized ORF; Ortholog(s) have anthranilate synthase activity, glyceraldehyde-3-phosphate dehydrogenase (NAD+) (phosphorylating) activity, indole-3-glycerol-phosphate synthase activity, phosphoribosylanthranilate isomerase activity	1.78	0.1715	1	3	8	9	764	82.2	6.34
Afu1g13230	Afu1g13230 AspGDID:ASPL0000102391 COORDS:Chr1_A_fumigatus_Af293:3512785-3515472W, translated using codon table 1 (895 amino acids) Uncharacterized ORF; Ortholog(s) have nucleotidyltransferase activity	0	0.1263	1	1	9	9	895	102.6	6.05
Afu1g13490	Afu1g13490 AspGDID:ASPL0000102417 COORDS:Chr1_A_fumigatus_Af293:3586808-3588296W, translated using codon table 1 (293 amino acids) Uncharacterized ORF; Putative spermidine synthase; protein induced by hydrogen peroxide	4.63	0.2662	1	4	5	5	293	33.4	5.54
Afu1g13500	tktA AspGDID:ASPL0000102418 COORDS:Chr1_A_fumigatus_Af293:3591128-3588583C, translated using codon table 1 (684 amino acids) Verified ORF; Putative transketolase; protein abundant in conidia; protein induced by heat shock and by hydrogen peroxide; reacts with rabbit immunosera exposed to A. fumigatus conidia	13.74	0.2778	1	8	14	15	684	74.8	6.6
Afu1g13710	Afu1g13710 AspGDID:ASPL0000102439 COORDS:Chr1_A_fumigatus_Af293:3650512-3647224C, translated using codon table 1 (1064 amino acids) Uncharacterized ORF; Isoleucyl-tRNA synthetase, cytoplasmic	5.17	0.1917	1	4	12	15	1064	122.3	6.43
Afu1g13750	Afu1g13750 AspGDID:ASPL0000102443 COORDS:Chr1_A_fumigatus_Af293:3669387-3671576W, translated using codon table 1 (729 amino acids) Uncharacterized ORF; C2H2 transcription factor; calcium induced	0	0.0905	1	1	4	5	729	80.9	6.86
Afu1g14220	nopA AspGDID:ASPL0000102490 COORDS:Chr1_A_fumigatus_Af293:3799657-3798472C, translated using codon table 1 (312 amino acids) Verified ORF; Nucleolar protein	2.4	0.1987	1	2	3	3	312	32.6	10.29
Afu1g14410	rpl17 AspGDID:ASPL0000102509 COORDS:Chr1_A_fumigatus_Af293:3851949-3852806W, translated using codon table 1 (208 amino acids) Uncharacterized ORF; 60S ribosomal protein L17	7.21	0.2115	1	3	3	3	208	23.4	10.98
Afu1g14550	sod3 AspGDID:ASPL0000102522 COORDS:Chr1_A_fumigatus_Af293:3887266-3888013W, translated using codon table 1 (210 amino acids) Verified ORF; Putative manganese superoxide dismutase; allergen Asp f 6; recognized by IgE from allergic patients; expressed only in hyphae; transcript up-regulated in hyphae exposed to neutrophils and to amphotericin B	16.81	0.5524	1	6	8	9	210	23.4	7.74
Afu1g14570	Afu1g14570 AspGDID:ASPL0000102524 COORDS:Chr1_A_fumigatus_Af293:3892553-3895217W, translated using codon table 1 (872 amino acids) Uncharacterized ORF; Putative phosphoribosyl-AMP cyclohydrolase; no human homolog	0	0.1296	1	4	8	10	872	92.8	5.66
Afu1g15020	Afu1g15020 AspGDID:ASPL0000102569 COORDS:Chr1_A_fumigatus_Af293:4039457-4040397W, translated using codon table 1 (215 amino acids) Uncharacterized ORF; 40S ribosomal protein S5; reacts with rabbit immunosera exposed to A. fumigatus conidia	5.23	0.2791	1	4	6	8	215	23.9	9.22
Afu1g15270	Afu1g15270 AspGDID:ASPL0000102593 COORDS:Chr1_A_fumigatus_Af293:4111044-4114037W, translated using codon table 1 (997 amino acids) Uncharacterized ORF; Ortholog(s) have cytosol, nuclear envelope localization	0	0.0622	1	3	5	5	997	111	5.71
Afu1g15720	Afu1g15720 AspGDID:ASPL0000102635 COORDS:Chr1_A_fumigatus_Af293:4249956-4253073W, translated using codon table 1 (872 amino acids) Uncharacterized ORF; Ortholog(s) have role in cell division and nuclear membrane localization	2.16	0.0998	1	3	5	5	872	96.2	4.77
Afu1g15730	Afu1g15730 AspGDID:ASPL0000102636 COORDS:Chr1_A_fumigatus_Af293:4254406-4255080W, translated using codon table 1 (130 amino acids) Uncharacterized ORF; 40S ribosomal protein S22	3.7	0.3077	1	1	3	3	130	14.7	9.66
Afu1g15960	Afu1g15960 AspGDID:ASPL0000102659 COORDS:Chr1_A_fumigatus_Af293:4331468-4333260W, translated using codon table 1 (554 amino acids) Uncharacterized ORF; Ortholog(s) have flavin adenine dinucleotide binding, glutathione transferase activity, glutathione-disulfide reductase activity	0	0.1498	1	1	5	5	554	60.1	8.7
Afu1g16110	Afu1g16110 AspGDID:ASPL0000102674 COORDS:Chr1_A_fumigatus_Af293:4381455-4380474C, translated using codon table 1 (253 amino acids) Uncharacterized ORF; Putative arsenic methyltransferase; predicted gene pair with AFUA_5G15020 (cyt19)	0	0.1067	2	1	2	2	253	27.3	5.14
Afu1g16810	Afu1g16810 AspGDID:ASPL0000102746 COORDS:Chr1_A_fumigatus_Af293:4588253-4586396C, translated using codon table 1 (475 amino acids) Uncharacterized ORF; Ortholog(s) have cytosol localization	0	0.0905	1	1	3	3	475	51	6.62
Afu1g16840	Afu1g16840 AspGDID:ASPL0000102749 COORDS:Chr1_A_fumigatus_Af293:4595884-4595128C, translated using codon table 1 (179 amino acids) Uncharacterized ORF; TCTP family protein	7.01	0.3911	1	2	5	6	179	20.2	4.97
Afu1g17250	rodB AspGDID:ASPL0000102790 COORDS:Chr1_A_fumigatus_Af293:4715931-4715408C, translated using codon table 1 (140 amino acids) Uncharacterized ORF; Conidial cell wall hydrophobin involved in conidial cell wall composition; not required for normal rodlet layer; protein repressed by amphotericin B; upregulated in biofilm vs planktonic culture; repressed by exposure to artemisinin	4.46	0.4571	1	2	3	3	140	14.3	6.71
Afu2g00360	Afu2g00360 AspGDID:ASPL0000102867 COORDS:Chr2_A_fumigatus_Af293:67194-69023W, translated using codon table 1 (593 amino acids) Uncharacterized ORF; Has domain(s) with predicted DNA binding, sequence-specific DNA binding, sequence-specific DNA binding RNA polymerase II transcription factor activity, sequence-specific DNA binding transcription factor activity, zinc ion binding activity	0	0.1568	1	1	5	6	593	66.9	6.4
Afu2g01170	gel1 AspGDID:ASPL0000102948 COORDS:Chr2_A_fumigatus_Af293:272509-273928W, translated using codon table 1 (452 amino acids) Verified ORF; 1,3-beta-glucanosyltransferase with a role in elongation of 1,3-beta-glucan chains; glycosylphosphatidylinositol (GPI)-anchored protein; constitutively expressed during hyphal growth; hypoxia induced protein	0	0.2279	1	1	5	6	452	48	5.19
Afu2g01210	Afu2g01210 AspGDID:ASPL0000102952 COORDS:Chr2_A_fumigatus_Af293:284424-286208W, translated using codon table 1 (489 amino acids) Uncharacterized ORF; Putative ATP dependent RNA helicase; transcript induced by exposure to human airway epithelial cells	2.36	0.135	1	3	6	9	489	53.9	5.71
Afu2g01220	Afu2g01220 AspGDID:ASPL0000102953 COORDS:Chr2_A_fumigatus_Af293:286825-288327W, translated using codon table 1 (447 amino acids) Uncharacterized ORF; Putative GTP cyclohydrolase II; transcript up-regulated in conidia exposed to neutrophils	2.92	0.1655	1	2	4	4	447	49.4	6.96
Afu2g02530	Afu2g02530 AspGDID:ASPL0000103083 COORDS:Chr2_A_fumigatus_Af293:653117-654358W, translated using codon table 1 (371 amino acids) Uncharacterized ORF; Ortholog(s) have role in activation of bipolar cell growth, homologous chromosome segregation, protein phosphorylation, regulation of DNA repair and regulation of circadian rhythm, <a href="#GOsection">more</a>	0	0.1294	1	1	3	4	371	42.4	9.45
Afu2g02590	Afu2g02590 AspGDID:ASPL0000103089 COORDS:Chr2_A_fumigatus_Af293:666730-668457W, translated using codon table 1 (555 amino acids) Uncharacterized ORF; Aspartyl-tRNA synthetase	7.18	0.1712	1	3	7	7	555	61.6	6.33
Afu2g02780	Afu2g02780 AspGDID:ASPL0000103108 COORDS:Chr2_A_fumigatus_Af293:722347-721173C, translated using codon table 1 (355 amino acids) Uncharacterized ORF; Ortholog(s) have mRNA binding activity, role in negative regulation of MAPK cascade and cytosol localization	0	0.1577	1	1	4	4	355	37.9	6.19
Afu2g02820	Afu2g02820 AspGDID:ASPL0000103112 COORDS:Chr2_A_fumigatus_Af293:725902-725497C, translated using codon table 1 (110 amino acids) Uncharacterized ORF; Ortholog of <i>S. cerevisiae</i> : MOH1, <i>A. nidulans FGSC A4</i> : AN4539, <i>A. niger CBS 513.88</i> : An07g07170, <i>A. oryzae RIB40</i> : AO090026000627 and <i>Aspergillus wentii</i> : Aspwe1_0168864	0	0.3455	1	1	2	2	110	12.7	8.25
Afu2g02840	Afu2g02840 AspGDID:ASPL0000103114 COORDS:Chr2_A_fumigatus_Af293:729153-731211W, translated using codon table 1 (640 amino acids) Uncharacterized ORF; Has domain(s) with predicted Rab GTPase activator activity, role in regulation of Rab GTPase activity and intracellular localization	0	0.1016	1	1	3	3	640	72.1	6.7
Afu2g02950	Afu2g02950 AspGDID:ASPL0000103124 COORDS:Chr2_A_fumigatus_Af293:754983-753816C, translated using codon table 1 (295 amino acids) Uncharacterized ORF; Has domain(s) with predicted oxidoreductase activity and role in oxidation-reduction process	0	0.1254	1	1	2	2	295	32.9	6.86
Afu2g03120	utr2 AspGDID:ASPL0000103141 COORDS:Chr2_A_fumigatus_Af293:817201-815743C, translated using codon table 1 (443 amino acids) Verified ORF; Putative cell wall glucanase; transcript induced by exposure to human airway epithelial cells	0	0.07	1	1	3	3	443	46.7	4.86
Afu2g03290	artA AspGDID:ASPL0000103158 COORDS:Chr2_A_fumigatus_Af293:868250-867203C, translated using codon table 1 (261 amino acids) Verified ORF; 14-3-3 family protein; predicted gene pair with AFUA_6G06750; conidia-enriched protein; protein induced by hydrogen peroxide; reacts with rabbit immunosera exposed to A. fumigatus conidia; hypoxia repressed protein	20.36	0.4061	1	4	9	11	261	29.1	4.84
Afu2g03380	Afu2g03380 AspGDID:ASPL0000103167 COORDS:Chr2_A_fumigatus_Af293:892615-891880C, translated using codon table 1 (127 amino acids) Uncharacterized ORF; Ortholog(s) have cytosol, mitochondrion, nucleus localization	0	0.2205	1	2	2	2	127	13.4	9.67
Afu2g03490	Afu2g03490 AspGDID:ASPL0000103178 COORDS:Chr2_A_fumigatus_Af293:921519-923827W, translated using codon table 1 (645 amino acids) Uncharacterized ORF; Putative calcium/calmodulin-dependent protein kinase; calcium induced; transcript induced by exposure to human airway epithelial cells	0	0.0884	1	2	3	3	645	72.1	6.87
Afu2g03510	sxa2 AspGDID:ASPL0000103180 COORDS:Chr2_A_fumigatus_Af293:932504-930704C, translated using codon table 1 (534 amino acids) Uncharacterized ORF; Putative pheromone processing carboxypeptidase; predicted signal sequence for secretion	0	0.2603	1	1	6	6	534	59.7	4.91
Afu2g03720	cyp4 AspGDID:ASPL0000103198 COORDS:Chr2_A_fumigatus_Af293:995026-995900W, translated using codon table 1 (205 amino acids) Uncharacterized ORF; Putative cyclophilin; peptidyl-prolyl cis-trans isomerase; allergen Asp f 11; transcript induced by growth on hydrogen peroxide	6.37	0.1902	1	4	5	5	205	22.3	8.57
Afu2g03860	zrfB AspGDID:ASPL0000103212 COORDS:Chr2_A_fumigatus_Af293:1030601-1031662W, translated using codon table 1 (353 amino acids) Verified ORF; Low affinity plasma membrane zinc transporter; induced by zinc depletion, ZafA-dependent; overexpression decreases zinc uptake, heme biosynthesis and triacetylfusarinine C (TAFC) siderophore production; induced in neutrophil-exposed conidia	1.63	0.2295	1	2	5	5	353	38.6	6.29
Afu2g04310	Afu2g04310 AspGDID:ASPL0000103257 COORDS:Chr2_A_fumigatus_Af293:1189815-1188083C, translated using codon table 1 (416 amino acids) Uncharacterized ORF; Argininosuccinate synthase; hypoxia induced protein	4.71	0.2236	1	5	6	6	416	46.1	5.48
Afu2g04620	bipA AspGDID:ASPL0000103288 COORDS:Chr2_A_fumigatus_Af293:1260682-1258486C, translated using codon table 1 (672 amino acids) Uncharacterized ORF; Hsp70 chaperone; protein enriched in dormant conidia	2.04	0.0923	1	2	5	7	672	73.3	5.03
Afu2g04720	Afu2g04720 AspGDID:ASPL0000103298 COORDS:Chr2_A_fumigatus_Af293:1294205-1290720C, translated using codon table 1 (1108 amino acids) Uncharacterized ORF; Ortholog(s) have endopeptidase activity, ubiquitin-specific protease activity	0	0.1363	1	1	10	12	1108	124.4	7.91
Afu2g05110	Afu2g05110 AspGDID:ASPL0000103336 COORDS:Chr2_A_fumigatus_Af293:1403645-1403098C, translated using codon table 1 (120 amino acids) Uncharacterized ORF; Ortholog(s) have U1 snRNP, U2 snRNP, cytosol localization	0	0.3833	1	1	2	2	120	13.2	11.28
Afu2g05910	hxkA AspGDID:ASPL0000103414 COORDS:Chr2_A_fumigatus_Af293:1662852-1664600W, translated using codon table 1 (490 amino acids) Verified ORF; Putative hexokinase; protein induced by heat shock	5.75	0.1612	1	2	4	4	490	54.2	5.17
Afu2g06150	pdiA AspGDID:ASPL0000103438 COORDS:Chr2_A_fumigatus_Af293:1746610-1744786C, translated using codon table 1 (517 amino acids) Verified ORF; Putative protein disulfide isomerase; conidial surface associated	9.54	0.1934	1	4	6	7	517	56.2	4.7
Afu2g06200	Afu2g06200 AspGDID:ASPL0000103443 COORDS:Chr2_A_fumigatus_Af293:1762681-1764118W, translated using codon table 1 (460 amino acids) Uncharacterized ORF; Ortholog(s) have role in CENP-A containing nucleosome assembly, chromatin silencing at centromere, mitotic sister chromatid segregation and nucleoplasm localization	0	0.1217	1	1	4	4	460	50.2	4.82
Afu2g07380	Afu2g07380 AspGDID:ASPL0000103461 COORDS:Chr2_A_fumigatus_Af293:1879464-1878670C, translated using codon table 1 (184 amino acids) Uncharacterized ORF; Ribosomal protein L18	2.41	0.0924	1	1	2	2	184	20.8	11.81
Afu2g07410	Afu2g07410 AspGDID:ASPL0000103464 COORDS:Chr2_A_fumigatus_Af293:1884575-1885603W, translated using codon table 1 (216 amino acids) Uncharacterized ORF; Ortholog(s) have role in anisotropic cell growth, hyphal growth	1.62	0.162	1	1	4	4	216	26.5	9.64
Afu2g07420	sac6 AspGDID:ASPL0000103465 COORDS:Chr2_A_fumigatus_Af293:1889973-1887748C, translated using codon table 1 (646 amino acids) Verified ORF; Putative actin-bundling protein, fimbrin; conidia-enriched protein	3.62	0.1579	1	2	7	7	646	72.4	6.13
Afu2g07500	pepP AspGDID:ASPL0000103473 COORDS:Chr2_A_fumigatus_Af293:1922270-1923825W, translated using codon table 1 (468 amino acids) Uncharacterized ORF; Putative prolidase; transcript induced by exposure to human airway epithelial cells; induced by growth on BSA as a sole nitrogen source	0	0.1902	1	2	6	6	468	51.9	5.73
Afu2g07900	stuA AspGDID:ASPL0000103510 COORDS:Chr2_A_fumigatus_Af293:2013839-2011772C, translated using codon table 1 (636 amino acids) Verified ORF; Putative APSES domain transcription factor; regulated by phoB; expression positively correlates with developmental competence in submerged culture; mutants are delayed in developmental competence	0	0.044	1	1	2	2	636	67.8	8.68
Afu2g07970	Afu2g07970 AspGDID:ASPL0000103517 COORDS:Chr2_A_fumigatus_Af293:2047985-2048981W, translated using codon table 1 (191 amino acids) Uncharacterized ORF; 60S ribosomal protein L19	2.84	0.3037	1	2	5	5	191	22.6	11.56
Afu2g09200	Afu2g09200 AspGDID:ASPL0000103638 COORDS:Chr2_A_fumigatus_Af293:2358357-2358900W, translated using codon table 1 (106 amino acids) Uncharacterized ORF; 60S ribosomal protein L30	0	0.4717	1	1	3	4	106	11.3	9.83
Afu2g09210	Afu2g09210 AspGDID:ASPL0000103639 COORDS:Chr2_A_fumigatus_Af293:2359448-2360452W, translated using codon table 1 (223 amino acids) Uncharacterized ORF; 60S ribosomal protein L10; reacts with rabbit immunosera exposed to A. fumigatus conidia	4.81	0.426	1	4	7	7	223	25.6	10.32
Afu2g09490	Afu2g09490 AspGDID:ASPL0000103667 COORDS:Chr2_A_fumigatus_Af293:2422679-2427552W, translated using codon table 1 (1525 amino acids) Uncharacterized ORF; Eukaryotic translation initiation factor subunit eIF-4F	0	0.0787	1	1	8	8	1525	163.9	9.36
Afu2g09650	Afu2g09650 AspGDID:ASPL0000103682 COORDS:Chr2_A_fumigatus_Af293:2480020-2481781W, translated using codon table 1 (469 amino acids) Uncharacterized ORF; Aspartate transaminase; induced by L-tyrosine; transcript up-regulated in conidia exposed to neutrophils	1.81	0.3092	1	2	8	9	469	51.2	8.48
Afu2g09790	Afu2g09790 AspGDID:ASPL0000103695 COORDS:Chr2_A_fumigatus_Af293:2503042-2501287C, translated using codon table 1 (553 amino acids) Uncharacterized ORF; Putative glucose-6-phosphate isomerase	5.23	0.1736	1	3	8	9	553	61.3	6.35
Afu2g09850	Afu2g09850 AspGDID:ASPL0000103701 COORDS:Chr2_A_fumigatus_Af293:2516744-2518045W, translated using codon table 1 (355 amino acids) Uncharacterized ORF; Putative oxidoreductase, 2-nitropropane dioxygenase family; transcript up-regulated in conidia exposed to neutrophils	3.71	0.0648	1	2	2	3	355	37.7	7.02
Afu2g09870	tif35 AspGDID:ASPL0000103703 COORDS:Chr2_A_fumigatus_Af293:2523373-2524473W, translated using codon table 1 (290 amino acids) Uncharacterized ORF; Eukaryotic translation initiation factor 3 subunit G	2.02	0.0828	1	1	2	2	290	31.9	8.79
Afu2g09910	faa4 AspGDID:ASPL0000103707 COORDS:Chr2_A_fumigatus_Af293:2540651-2538322C, translated using codon table 1 (697 amino acids) Uncharacterized ORF; Putative long chain fatty acid CoA ligase; fatty acid activator; hypoxia repressed protein	2.6	0.1564	1	1	7	8	697	76.7	7.31
Afu2g09960	ssc70 AspGDID:ASPL0000103712 COORDS:Chr2_A_fumigatus_Af293:2553995-2551772C, translated using codon table 1 (661 amino acids) Verified ORF; Putative mitochondrial Hsp70 chaperone; reacts with rabbit immunosera exposed to A. fumigatus conidia; hypoxia induced protein	5.3	0.1165	1	3	7	10	661	71.9	6.16
Afu2g10030	Afu2g10030 AspGDID:ASPL0000103718 COORDS:Chr2_A_fumigatus_Af293:2570628-2569665C, translated using codon table 1 (265 amino acids) Uncharacterized ORF; Immunoreactive protein; calcium induced; transcript induced by exposure to human airway epithelial cells; induced by gliotoxin exposure	3.58	0.0792	1	2	2	2	265	28.2	6.37
Afu2g10070	Afu2g10070 AspGDID:ASPL0000103722 COORDS:Chr2_A_fumigatus_Af293:2576586-2580364W, translated using codon table 1 (1175 amino acids) Uncharacterized ORF; Putative carbamoyl-phosphate synthetase, large subunit	0	0.0672	1	1	5	6	1175	129.1	6.21
Afu2g10090	Afu2g10090 AspGDID:ASPL0000103724 COORDS:Chr2_A_fumigatus_Af293:2584422-2583412C, translated using codon table 1 (153 amino acids) Uncharacterized ORF; 40S ribosomal protein S15	7	0.3922	1	1	3	5	153	17.7	10.07
Afu2g10100	aspf8 AspGDID:ASPL0000103725 COORDS:Chr2_A_fumigatus_Af293:2585506-2585100C, translated using codon table 1 (111 amino acids) Uncharacterized ORF; Allergen Asp f 8; putative ribosomal protein P2; transcript induced by growth on hydrogen peroxide and menadione	2.1	0.1982	1	1	2	2	111	11.1	4.34
Afu2g10300	Afu2g10300 AspGDID:ASPL0000103745 COORDS:Chr2_A_fumigatus_Af293:2636570-2637526W, translated using codon table 1 (198 amino acids) Uncharacterized ORF; 40S ribosomal protein S17	0	0.1061	1	1	2	2	198	22.7	9.99
Afu2g10500	Afu2g10500 AspGDID:ASPL0000103765 COORDS:Chr2_A_fumigatus_Af293:2687569-2686778C, translated using codon table 1 (143 amino acids) Uncharacterized ORF; 40S ribosomal protein Rps16	0	0.1469	1	1	2	2	143	16	10.18
Afu2g10660	mpdA AspGDID:ASPL0000103781 COORDS:Chr2_A_fumigatus_Af293:2727506-2726340C, translated using codon table 1 (388 amino acids) Verified ORF; Putative mannitol-1-phosphate dehydrogenase; conidia-enriched protein; protein induced by heat shock; reacts with rabbit immunosera exposed to conidia; no human homolog	0	0.116	1	2	2	2	388	43	5.9
Afu2g11060	Afu2g11060 AspGDID:ASPL0000103821 COORDS:Chr2_A_fumigatus_Af293:2836626-2837531W, translated using codon table 1 (158 amino acids) Uncharacterized ORF; Putative acylCoA binding family protein	10.02	0.3291	1	3	4	4	158	17.3	6
Afu2g11150	Afu2g11150 AspGDID:ASPL0000103830 COORDS:Chr2_A_fumigatus_Af293:2856083-2857872W, translated using codon table 1 (468 amino acids) Uncharacterized ORF; Putative secretory-pathway GDP dissociation inhibitor; transcript and protein levels increase upon exposure to amphotericin B	0	0.1645	1	1	7	7	468	52.2	5.5
Afu2g11340	Afu2g11340 AspGDID:ASPL0000103849 COORDS:Chr2_A_fumigatus_Af293:2922123-2921251C, translated using codon table 1 (248 amino acids) Uncharacterized ORF; Ortholog(s) have role in intracellular sterol transport and fungal-type vacuole lumen localization	4.13	0.1694	1	3	4	4	248	27.3	5.94
Afu2g11850	rpL3 AspGDID:ASPL0000103899 COORDS:Chr2_A_fumigatus_Af293:3060721-3062260W, translated using codon table 1 (392 amino acids) Uncharacterized ORF; Allergenic ribosomal L3 protein; allergen Asp f 23; transcript induced in response to dibutyryl cyclic AMP	5.05	0.2245	1	4	6	6	392	44.4	10.18
Afu2g11940	ade13 AspGDID:ASPL0000103908 COORDS:Chr2_A_fumigatus_Af293:3080820-3078848C, translated using codon table 1 (483 amino acids) Uncharacterized ORF; Adenylosuccinate lyase; reacts with rabbit immunosera exposed to A. fumigatus conidia	3.43	0.1863	1	1	7	7	483	54.7	6.55
Afu2g12450	Afu2g12450 AspGDID:ASPL0000103959 COORDS:Chr2_A_fumigatus_Af293:3199555-3200700W, translated using codon table 1 (354 amino acids) Uncharacterized ORF; Putative hydroxymethylglutaryl-CoA lyase; transcript up-regulated in conidia exposed to neutrophils	10.39	0.4096	1	6	8	8	354	37.8	6.8
Afu2g13240	Afu2g13240 AspGDID:ASPL0000104038 COORDS:Chr2_A_fumigatus_Af293:3402661-3404769W, translated using codon table 1 (506 amino acids) Uncharacterized ORF; Putative V-type ATPase, B subunit; transcript induced by exposure to human airway epithelial cells	5.26	0.3735	1	5	12	13	506	56.4	6
Afu2g13530	Afu2g13530 AspGDID:ASPL0000104068 COORDS:Chr2_A_fumigatus_Af293:3518148-3521066W, translated using codon table 1 (839 amino acids) Verified ORF; Putative translation elongation factor EF-2 subunit; protein abundant in conidia; protein induced by heat shock	40.5	0.497	2	24	32	41	839	93.1	6.96
Afu2g13680	Afu2g13680 AspGDID:ASPL0000104083 COORDS:Chr2_A_fumigatus_Af293:3556768-3558269W, translated using codon table 1 (434 amino acids) Uncharacterized ORF; Putative calcium/calmodulin-dependent protein kinase; transcript induced by exposure to human airway epithelial cells	0	0.1359	1	1	5	5	434	48.7	6.49
Afu2g13740	Afu2g13740 AspGDID:ASPL0000104089 COORDS:Chr2_A_fumigatus_Af293:3565891-3569173W, translated using codon table 1 (1002 amino acids) Uncharacterized ORF; Ortholog(s) have role in chromatin remodeling, positive regulation of protein phosphorylation, signal transduction involved in mitotic DNA replication checkpoint and ASTRA complex, TORC1 complex, TORC2 complex, cytosol localization	0	0.0848	1	1	3	3	1002	109.7	5.82
Afu2g13750	Afu2g13750 AspGDID:ASPL0000104090 COORDS:Chr2_A_fumigatus_Af293:3571760-3569381C, translated using codon table 1 (660 amino acids) Uncharacterized ORF; Ortholog(s) have role in protein targeting to vacuole, vacuole organization and cytosol, nucleus localization	0	0.0561	1	1	3	3	660	73.5	8.03
Afu2g13860	Afu2g13860 AspGDID:ASPL0000104101 COORDS:Chr2_A_fumigatus_Af293:3619597-3620049W, translated using codon table 1 (142 amino acids) Uncharacterized ORF; Histone H4	1.87	0.1408	2	1	2	3	142	15.8	10.21
Afu2g14030	Afu2g14030 AspGDID:ASPL0000104118 COORDS:Chr2_A_fumigatus_Af293:3674689-3672338C, translated using codon table 1 (719 amino acids) Uncharacterized ORF; Ortholog(s) have arginine-tRNA ligase activity, role in arginyl-tRNA aminoacylation and cytosol, mitochondrion localization	0	0.1655	1	1	8	11	719	80.7	8
Afu2g14180	Afu2g14180 AspGDID:ASPL0000104133 COORDS:Chr2_A_fumigatus_Af293:3714284-3708830C, translated using codon table 1 (1660 amino acids) Uncharacterized ORF; Ortholog(s) have cytosol, nucleus localization	0	0.1042	1	1	11	11	1660	184.1	6.19
Afu2g14210	ilv3 AspGDID:ASPL0000104136 COORDS:Chr2_A_fumigatus_Af293:3721264-3723226W, translated using codon table 1 (606 amino acids) Verified ORF; Putative mitochondrial dihydroxy acid dehydratase; hypoxia induced protein; induced by exposure to human airway epithelial cells; required for virulence	2.56	0.1881	1	2	9	11	606	64.7	7.65
Afu2g14270	Afu2g14270 AspGDID:ASPL0000104142 COORDS:Chr2_A_fumigatus_Af293:3742174-3739906C, translated using codon table 1 (603 amino acids) Uncharacterized ORF; Putative actin-binding protein; hypoxia repressed protein	0	0.1526	1	1	5	5	603	65.9	5.62
Afu2g14990	Afu2g14990 AspGDID:ASPL0000104214 COORDS:Chr2_A_fumigatus_Af293:3948734-3946908C, translated using codon table 1 (451 amino acids) Uncharacterized ORF; Tubulin alpha-2 subunit; gene pair with AFUA_1G02550 (tubulin alpha-1 subunit)	1.72	0.0599	1	1	2	3	451	50.4	5.16
Afu2g15760	Afu2g15760 AspGDID:ASPL0000104293 COORDS:Chr2_A_fumigatus_Af293:4162600-4165937W, translated using codon table 1 (1033 amino acids) Uncharacterized ORF; Ortholog(s) have ubiquitin activating enzyme activity, role in mRNA export from nucleus, protein ubiquitination and cytosol, nucleus localization	8.89	0.2275	1	5	12	13	1033	115.1	5.25
Afu2g15940	Afu2g15940 AspGDID:ASPL0000104311 COORDS:Chr2_A_fumigatus_Af293:4216706-4215369C, translated using codon table 1 (445 amino acids) Uncharacterized ORF; Cofactor for methionyl-and glutamyl-tRNA synthetases	0	0.1416	1	1	3	4	445	47.5	6.96
Afu2g16010	Afu2g16010 AspGDID:ASPL0000104318 COORDS:Chr2_A_fumigatus_Af293:4237529-4235525C, translated using codon table 1 (601 amino acids) Uncharacterized ORF; Prolyl-tRNA synthetase	2.05	0.2196	1	3	10	10	601	67	7.17
Afu2g16090	Afu2g16090 AspGDID:ASPL0000104326 COORDS:Chr2_A_fumigatus_Af293:4262510-4260510C, translated using codon table 1 (552 amino acids) Uncharacterized ORF; Karyopherin alpha subunit	2.49	0.1322	1	3	5	9	552	60.6	5.07
Afu2g16200	Afu2g16200 AspGDID:ASPL0000104338 COORDS:Chr2_A_fumigatus_Af293:4291200-4290389C, translated using codon table 1 (227 amino acids) Uncharacterized ORF; Ortholog(s) have cytosol, nucleus localization	4.2	0.2203	1	1	2	2	227	24.3	5.82
Afu2g16370	Afu2g16370 AspGDID:ASPL0000104355 COORDS:Chr2_A_fumigatus_Af293:4343499-4342697C, translated using codon table 1 (131 amino acids) Uncharacterized ORF; 60S ribosomal protein L32	2.27	0.1679	1	1	2	2	131	15	11.27
Afu2g16400	Afu2g16400 AspGDID:ASPL0000104358 COORDS:Chr2_A_fumigatus_Af293:4350318-4348385C, translated using codon table 1 (504 amino acids) Uncharacterized ORF; Translation initiation factor 4B	0	0.3016	1	1	8	9	504	54.2	9.07
Afu2g16920	Afu2g16920 AspGDID:ASPL0000104411 COORDS:Chr2_A_fumigatus_Af293:4524971-4523657C, translated using codon table 1 (345 amino acids) Uncharacterized ORF; Ortholog(s) have actin filament binding, actin monomer binding activity and role in actin cortical patch organization, actin filament depolymerization, actin filament severing, sequestering of actin monomers	0	0.2116	1	1	4	4	345	37.7	5.41
Afu2g17110	cdc48 AspGDID:ASPL0000104427 COORDS:Chr2_A_fumigatus_Af293:4568058-4570820W, translated using codon table 1 (819 amino acids) Uncharacterized ORF; Putative cell division control protein; protein induced by heat shock	0	0.1038	1	5	7	9	819	90.2	5.22
Afu3g00270	bgt2 AspGDID:ASPL0000104548 COORDS:Chr3_A_fumigatus_Af293:57708-56302C, translated using codon table 1 (446 amino acids) Verified ORF; Cell wall glucanase; predicted glycophosphatidylinositol (GPI)-anchor; secreted protein	6.32	0.0807	1	3	3	3	446	44.6	5.07
Afu3g00940	Afu3g00940 AspGDID:ASPL0000104614 COORDS:Chr3_A_fumigatus_Af293:222859-224321W, translated using codon table 1 (470 amino acids) Uncharacterized ORF; Has domain(s) with predicted methyltransferase activity and role in metabolic process	0	0.2745	1	1	6	8	470	51.7	5.49
Afu3g02010	Afu3g02010 AspGDID:ASPL0000104720 COORDS:Chr3_A_fumigatus_Af293:494418-496280W, translated using codon table 1 (566 amino acids) Uncharacterized ORF; Ortholog(s) have versicolorin reductase activity and role in positive regulation of sterigmatocystin biosynthetic process, sterigmatocystin biosynthetic process	2.53	0.1378	1	1	6	6	566	64	6.73
Afu3g02220	Afu3g02220 AspGDID:ASPL0000104744 COORDS:Chr3_A_fumigatus_Af293:550422-549907C, translated using codon table 1 (98 amino acids) Uncharacterized ORF; Ortholog of <i>A. nidulans FGSC A4</i> : AN11076, <i>A. niger CBS 513.88</i> : An01g02020, <i>Neosartorya fischeri NRRL 181</i> : NFIA_003350, <i>Aspergillus wentii</i> : Aspwe1_0171305 and <i>Aspergillus versicolor</i> : Aspve1_0056749	2.99	0.3878	1	1	3	3	98	11.1	5.14
Afu3g02270	cat1 AspGDID:ASPL0000104749 COORDS:Chr3_A_fumigatus_Af293:563576-566077W, translated using codon table 1 (728 amino acids) Verified ORF; Mycelial catalase; induced in hyphae exposed to neutrophils; protein induced in amphotericin B and H2O2; stuA-dependent up-regulation in developmentally competent hyphae; hypoxia repressed; SrbA-regulated; repressed by gliotoxin exposure	2.17	0.0824	1	1	4	4	728	79.9	5.82
Afu3g03330	Afu3g03330 AspGDID:ASPL0000104852 COORDS:Chr3_A_fumigatus_Af293:891157-889931C, translated using codon table 1 (408 amino acids) Uncharacterized ORF; Has domain(s) with predicted oxidoreductase activity, transferase activity, transferring acyl groups other than amino-acyl groups, zinc ion binding activity and role in oxidation-reduction process	3.21	0.098	1	1	2	2	408	45.6	8.13
Afu3g04160	Afu3g04160 AspGDID:ASPL0000104932 COORDS:Chr3_A_fumigatus_Af293:1175172-1173244C, translated using codon table 1 (626 amino acids) Uncharacterized ORF; Ortholog(s) have endoplasmic reticulum, extracellular region localization	0	0.155	1	1	5	6	626	71.3	5.83
Afu3g04170	Afu3g04170 AspGDID:ASPL0000104933 COORDS:Chr3_A_fumigatus_Af293:1175521-1176878W, translated using codon table 1 (377 amino acids) Uncharacterized ORF; Ortholog(s) have pyruvate dehydrogenase (acetyl-transferring) activity and role in acetyl-CoA biosynthetic process from pyruvate, arginine biosynthetic process, glutamine biosynthetic process	1.96	0.1167	1	2	3	3	377	40.5	7.24
Afu3g04220	Afu3g04220 AspGDID:ASPL0000104938 COORDS:Chr3_A_fumigatus_Af293:1190959-1197288W, translated using codon table 1 (2092 amino acids) Uncharacterized ORF; Putative fatty acid synthase beta subunit; calcium downregulated; repressed by exposure to artemisinin; no human homolog	2.29	0.1467	1	4	16	16	2092	231.9	6.28
Afu3g04250	Afu3g04250 AspGDID:ASPL0000104941 COORDS:Chr3_A_fumigatus_Af293:1208055-1206988C, translated using codon table 1 (294 amino acids) Uncharacterized ORF; Ortholog(s) have inositol monophosphate 1-phosphatase activity and role in inositol phosphate dephosphorylation	0	0.1122	1	1	2	2	294	31.9	5.16
Afu3g05350	htb1 AspGDID:ASPL0000104951 COORDS:Chr3_A_fumigatus_Af293:1290859-1290284C, translated using codon table 1 (140 amino acids) Uncharacterized ORF; Histone H2B	3.2	0.3	1	2	3	4	140	14.9	10.13
Afu3g05360	Afu3g05360 AspGDID:ASPL0000104952 COORDS:Chr3_A_fumigatus_Af293:1291520-1292443W, translated using codon table 1 (265 amino acids) Uncharacterized ORF; Has domain(s) with predicted DNA binding, protein heterodimerization activity, role in nucleosome assembly and nucleosome, nucleus localization	7.38	0.1358	2	2	2	2	265	29.8	10.15
Afu3g05370	Afu3g05370 AspGDID:ASPL0000104953 COORDS:Chr3_A_fumigatus_Af293:1293607-1295556W, translated using codon table 1 (461 amino acids) Uncharacterized ORF; Putative dihydrolipoamide succinyltransferase; reacts with rabbit immunosera exposed to A. fumigatus conidia; hypoxia induced protein; transcript induced by exposure to human airway epithelial cells	0	0.1974	1	4	7	8	461	50.3	8.88
Afu3g05430	Afu3g05430 AspGDID:ASPL0000104959 COORDS:Chr3_A_fumigatus_Af293:1307445-1305739C, translated using codon table 1 (507 amino acids) Uncharacterized ORF; Ortholog(s) have translation regulator activity, nucleic acid binding activity	1.67	0.1893	1	1	6	8	507	57.1	8.82
Afu3g05600	Afu3g05600 AspGDID:ASPL0000104976 COORDS:Chr3_A_fumigatus_Af293:1361310-1362104W, translated using codon table 1 (149 amino acids) Uncharacterized ORF; 60S ribosomal protein L27a	7.72	0.3624	1	3	5	5	149	16.8	10.43
Afu3g06030	Afu3g06030 AspGDID:ASPL0000105014 COORDS:Chr3_A_fumigatus_Af293:1483778-1482859C, translated using codon table 1 (147 amino acids) Uncharacterized ORF; Ortholog(s) have ubiquitin binding, ubiquitin-protein transferase activity	6.38	0.381	1	3	3	3	147	16.5	6.92
Afu3g06050	Afu3g06050 AspGDID:ASPL0000105016 COORDS:Chr3_A_fumigatus_Af293:1489824-1487390C, translated using codon table 1 (742 amino acids) Uncharacterized ORF; Ortholog(s) have role in filamentous growth of a population of unicellular organisms in response to biotic stimulus and growth of unicellular organism as a thread of attached cells, <a href="#GOsection">more</a>	0	0.0809	1	1	7	7	742	83.3	7.23
Afu3g06530	sC AspGDID:ASPL0000105064 COORDS:Chr3_A_fumigatus_Af293:1618981-1616721C, translated using codon table 1 (574 amino acids) Uncharacterized ORF; Putative ATP sulfurylase; sulfate adenylyltransferase; reacts with rabbit immunosera exposed to A. fumigatus conidia; hypoxia repressed protein	0	0.1463	1	1	6	6	574	64.3	7.06
Afu3g06610	Afu3g06610 AspGDID:ASPL0000105072 COORDS:Chr3_A_fumigatus_Af293:1639448-1641145W, translated using codon table 1 (508 amino acids) Uncharacterized ORF; Proteasome regulatory particle subunit; transcript induced by exposure to human airway epithelial cells	0	0.128	1	1	4	4	508	58.4	7.18
Afu3g06840	Afu3g06840 AspGDID:ASPL0000105095 COORDS:Chr3_A_fumigatus_Af293:1702997-1704159W, translated using codon table 1 (261 amino acids) Uncharacterized ORF; Putative cytosolic small ribosomal subunit S4	8.47	0.3525	1	4	8	8	261	29.5	10.07
Afu3g06880	snxA AspGDID:ASPL0000105099 COORDS:Chr3_A_fumigatus_Af293:1715479-1714881C, translated using codon table 1 (142 amino acids) Uncharacterized ORF; Sorting nexin	0	0.1549	1	1	2	2	142	16.7	8.19
Afu3g06960	Afu3g06960 AspGDID:ASPL0000105107 COORDS:Chr3_A_fumigatus_Af293:1742922-1742198C, translated using codon table 1 (158 amino acids) Uncharacterized ORF; 60S ribosomal protein L21	4.5	0.3291	1	2	4	4	158	18	10.23
Afu3g06970	Afu3g06970 AspGDID:ASPL0000105108 COORDS:Chr3_A_fumigatus_Af293:1743190-1744103W, translated using codon table 1 (193 amino acids) Uncharacterized ORF; 40S ribosomal protein S9; transcript induced by exposure to human airway epithelial cells	4.17	0.2228	1	4	4	4	193	22.2	10.05
Afu3g07130	Afu3g07130 AspGDID:ASPL0000105124 COORDS:Chr3_A_fumigatus_Af293:1786716-1790777W, translated using codon table 1 (1275 amino acids) Uncharacterized ORF; Putative two-component response regulator, two-component sensor	0	0.1278	1	1	7	7	1275	138.5	5.53
Afu3g07430	aspf27 AspGDID:ASPL0000105151 COORDS:Chr3_A_fumigatus_Af293:1867882-1867179C, translated using codon table 1 (163 amino acids) Verified ORF; Putative peptidyl-prolyl cis-trans isomerase; cyclophilin; allergen Asp f 27; protein abundant in conidia; Yap1-dependent induction in response to hydrogen peroxide; induced by L-tyrosine	1.83	0.2454	1	3	4	5	163	17.7	7.97
Afu3g07640	pma1 AspGDID:ASPL0000105170 COORDS:Chr3_A_fumigatus_Af293:1930419-1933527W, translated using codon table 1 (988 amino acids) Verified ORF; Putative plasma membrane H+ ATPase; transcript upregulated during conidial germination and in response to amphotericin B; protein and transcript levels downregulated by caspofungin treatment	0	0.1417	1	3	10	13	988	108.9	5.36
Afu3g07680	Afu3g07680 AspGDID:ASPL0000105174 COORDS:Chr3_A_fumigatus_Af293:1941416-1940148C, translated using codon table 1 (422 amino acids) Uncharacterized ORF; Putative ran GTPase activating protein	1.68	0.1991	1	1	7	7	422	46.2	4.68
Afu3g07810	sdh1 AspGDID:ASPL0000105185 COORDS:Chr3_A_fumigatus_Af293:1970306-1968056C, translated using codon table 1 (647 amino acids) Uncharacterized ORF; Succinate dehydrogenase flavoprotein subunit; role in the citric acid cycle; up-regulated in conidia exposed to neutrophils and during conidial germination; hypoxia repressed protein and transcript; induced by exposure to artemisinin	8.17	0.1932	1	4	8	8	647	71.1	6.98
Afu3g08110	Afu3g08110 AspGDID:ASPL0000105214 COORDS:Chr3_A_fumigatus_Af293:2077251-2079098W, translated using codon table 1 (615 amino acids) Uncharacterized ORF; Putative cell wall protein; transcript downregulated in response to amphotericin B and calcium	3.59	0.0325	1	2	2	2	615	60.1	4.55
Afu3g08160	tif1 AspGDID:ASPL0000105219 COORDS:Chr3_A_fumigatus_Af293:2095759-2094223C, translated using codon table 1 (406 amino acids) Verified ORF; Eukaryotic translation initiation factor eIF4A; ATP-dependent RNA helicase; protein induced by heat shock; predicted gene pair with AFUA_5G02410	20.91	0.3719	2	8	11	14	406	45.7	5.19
Afu3g08200	ams1 AspGDID:ASPL0000105223 COORDS:Chr3_A_fumigatus_Af293:2103989-2100561C, translated using codon table 1 (1088 amino acids) Verified ORF; Putative Class IIC alpha-mannosidase with a predicted role in oligosaccharide catabolism and N-glycan processing	6.69	0.2096	1	6	13	13	1088	123.7	6.27
Afu3g08380	ipp1 AspGDID:ASPL0000105241 COORDS:Chr3_A_fumigatus_Af293:2149763-2148296C, translated using codon table 1 (396 amino acids) Uncharacterized ORF; Putative inorganic diphosphatase; reacts with rabbit immunosera exposed to A. fumigatus conidia	12.86	0.4924	1	10	13	13	396	43.6	7.77
Afu3g08460	Afu3g08460 AspGDID:ASPL0000105249 COORDS:Chr3_A_fumigatus_Af293:2169117-2168265C, translated using codon table 1 (109 amino acids) Uncharacterized ORF; 60S ribosomal protein L35Ae	0	0.3486	1	2	4	4	109	12.3	11.22
Afu3g08470	Afu3g08470 AspGDID:ASPL0000105250 COORDS:Chr3_A_fumigatus_Af293:2171618-2174019W, translated using codon table 1 (511 amino acids) Verified ORF; Glucose-6-phosphate 1-dehydrogenase	0	0.1546	1	1	5	5	511	58.9	7.01
Afu3g08500	Afu3g08500 AspGDID:ASPL0000105253 COORDS:Chr3_A_fumigatus_Af293:2182502-2179103C, translated using codon table 1 (1005 amino acids) Uncharacterized ORF; Ortholog of <i>A. nidulans FGSC A4</i> : AN2983/msb1, <i>A. niger CBS 513.88</i> : An02g12170, <i>A. oryzae RIB40</i> : AO090005001425, <i>Aspergillus wentii</i> : Aspwe1_0052317 and <i>Aspergillus sydowii</i> : Aspsy1_0146126	1.62	0.1771	1	1	10	10	1005	109.3	6.71
Afu3g08580	Afu3g08580 AspGDID:ASPL0000105260 COORDS:Chr3_A_fumigatus_Af293:2200468-2201143W, translated using codon table 1 (118 amino acids) Uncharacterized ORF; Putative glycine-rich RNA-binding protein with a predicted role in transcription; protein level decreases upon heat shock	5.95	0.5847	1	3	4	4	118	12.8	5.96
Afu3g08620	Afu3g08620 AspGDID:ASPL0000105264 COORDS:Chr3_A_fumigatus_Af293:2208889-2209789W, translated using codon table 1 (242 amino acids) Uncharacterized ORF; Ortholog(s) have role in negative regulation of Arp2/3 complex-mediated actin nucleation and actin cortical patch, nucleus localization	2.01	0.1901	1	1	3	3	242	26.1	6.95
Afu3g08660	idp1 AspGDID:ASPL0000105268 COORDS:Chr3_A_fumigatus_Af293:2219058-2221293W, translated using codon table 1 (501 amino acids) Uncharacterized ORF; Putative isocitrate dehydrogenase; protein induced by heat shock	4.92	0.1257	1	4	5	5	501	55.7	8.73
Afu3g08840	Afu3g08840 AspGDID:ASPL0000105285 COORDS:Chr3_A_fumigatus_Af293:2262208-2266262W, translated using codon table 1 (1212 amino acids) Uncharacterized ORF; Ortholog(s) have role in hyphal growth, nuclear division and Golgi apparatus, hyphal tip localization	1.67	0.1073	1	1	8	10	1212	135.8	6.28
Afu3g08980	Afu3g08980 AspGDID:ASPL0000105299 COORDS:Chr3_A_fumigatus_Af293:2294770-2296443W, translated using codon table 1 (536 amino acids) Uncharacterized ORF; Ortholog(s) have threonine synthase activity, role in threonine biosynthetic process and cytosol, nucleus localization	1.66	0.2313	1	2	7	7	536	59.2	6.2
Afu3g09320	Afu3g09320 AspGDID:ASPL0000105330 COORDS:Chr3_A_fumigatus_Af293:2359631-2361249W, translated using codon table 1 (471 amino acids) Uncharacterized ORF; Serine hydroxymethyltransferase; protein level decreases upon heat shock; reacts with rabbit immunosera exposed to A. fumigatus conidia; hypoxia induced protein; SrbA-regulated during hypoxia	8.86	0.3248	1	7	14	14	471	51.8	7.75
Afu3g10000	pkaR AspGDID:ASPL0000105398 COORDS:Chr3_A_fumigatus_Af293:2570161-2571402W, translated using codon table 1 (413 amino acids) Verified ORF; cAMP-dependent protein kinase regulatory subunit; induced by endothelial cells and human airway epithelial cells; mutants sensitive to storage in water and contain more nuclei than wild-type; up-regulated in neutrophil-exposed conidia	4.13	0.1138	1	1	2	2	413	44.5	5.19
Afu3g10660	erg13 AspGDID:ASPL0000105464 COORDS:Chr3_A_fumigatus_Af293:2760689-2762268W, translated using codon table 1 (460 amino acids) Uncharacterized ORF; Putative hydroxymethyl glutaryl-coenzyme A synthase with a predicted role in ergosterol biosynthesis; SrbA-regulated during hypoxia	0	0.1217	1	1	3	5	460	50.8	6.55
Afu3g10680	Afu3g10680 AspGDID:ASPL0000105466 COORDS:Chr3_A_fumigatus_Af293:2766549-2768521W, translated using codon table 1 (573 amino acids) Uncharacterized ORF; Ortholog of <i>A. nidulans FGSC A4</i> : AN4921, <i>A. niger CBS 513.88</i> : An02g06340, <i>A. oryzae RIB40</i> : AO090003000613, <i>Aspergillus wentii</i> : Aspwe1_0360214 and <i>Aspergillus sydowii</i> : Aspsy1_0056501	0	0.1361	1	1	7	9	573	64.1	8.12
Afu3g10730	Afu3g10730 AspGDID:ASPL0000105471 COORDS:Chr3_A_fumigatus_Af293:2781133-2780135C, translated using codon table 1 (201 amino acids) Uncharacterized ORF; 40S ribosomal protein S7e	12.32	0.4577	1	4	6	7	201	22.8	10.15
Afu3g11220	Afu3g11220 AspGDID:ASPL0000105520 COORDS:Chr3_A_fumigatus_Af293:2944962-2946554W, translated using codon table 1 (408 amino acids) Uncharacterized ORF; Ortholog(s) have endoribonuclease activity, role in RNA catabolic process, apoptotic process, cell morphogenesis and cytosol, extracellular region, vacuole localization	0	0.0613	1	1	2	2	408	45.5	6.2
Afu3g11400	pep2 AspGDID:ASPL0000105538 COORDS:Chr3_A_fumigatus_Af293:2990626-2992029W, translated using codon table 1 (398 amino acids) Verified ORF; Aspartic acid endopeptidase; conidia-enriched protein; conidial surface associated; predicted signal secretion sequence; hypoxia induced protein; transcript up-regulated in conidia exposed to neutrophils and by growth on BSA	13.76	0.1281	1	3	3	5	398	43.3	5
Afu3g11690	Afu3g11690 AspGDID:ASPL0000105565 COORDS:Chr3_A_fumigatus_Af293:3071255-3069978C, translated using codon table 1 (360 amino acids) Uncharacterized ORF; Putative class II fructose-bisphosphate aldolase; immunoreactive protein; reacts with rabbit immunosera exposed to A. fumigatus conidia; hypoxia induced protein	7.88	0.2917	1	5	9	9	360	39.8	5.85
Afu3g11830	pgmA AspGDID:ASPL0000105579 COORDS:Chr3_A_fumigatus_Af293:3113884-3115685W, translated using codon table 1 (555 amino acids) Uncharacterized ORF; Putative phosphoglucomutase; reacts with rabbit immunosera exposed to A. fumigatus conidia; hypoxia repressed protein; transcript up-regulated in conidia exposed to neutrophils	17.04	0.3117	1	8	14	15	555	60.5	6.76
Afu3g12270	Afu3g12270 AspGDID:ASPL0000105623 COORDS:Chr3_A_fumigatus_Af293:3237221-3238007W, translated using codon table 1 (235 amino acids) Uncharacterized ORF; Putative glutathione peroxidase; peroxiredoxin; transcript upregulated in hyphae exposed to neutrophils	1.73	0.234	1	3	5	5	235	25.7	9.22
Afu3g12300	Afu3g12300 AspGDID:ASPL0000105626 COORDS:Chr3_A_fumigatus_Af293:3242604-3243283W, translated using codon table 1 (124 amino acids) Uncharacterized ORF; 60S ribosomal protein L22	1.9	0.3306	1	2	3	3	124	14.2	9.41
Afu3g12420	Afu3g12420 AspGDID:ASPL0000105638 COORDS:Chr3_A_fumigatus_Af293:3274503-3276680W, translated using codon table 1 (670 amino acids) Uncharacterized ORF; Ortholog(s) have extracellular region localization	0	0.0955	1	1	4	4	670	75.4	5.27
Afu3g12510	Afu3g12510 AspGDID:ASPL0000105647 COORDS:Chr3_A_fumigatus_Af293:3303007-3305658W, translated using codon table 1 (825 amino acids) Uncharacterized ORF; Ortholog(s) have cytoplasm localization	0	0.0473	1	1	2	4	825	90.3	7.03
Afu3g12990	Afu3g12990 AspGDID:ASPL0000105695 COORDS:Chr3_A_fumigatus_Af293:3453144-3451125C, translated using codon table 1 (657 amino acids) Uncharacterized ORF; Putative methyltransferase; member of a biosynthetic gene cluster	0	0.0807	1	1	4	5	657	71.9	9.47
Afu3g13320	rps0 AspGDID:ASPL0000105727 COORDS:Chr3_A_fumigatus_Af293:3533778-3534743W, translated using codon table 1 (297 amino acids) Uncharacterized ORF; Putative 40S ribosomal protein S0	2.91	0.1515	1	4	4	5	297	32.1	4.91
Afu3g13820	Afu3g13820 AspGDID:ASPL0000105775 COORDS:Chr3_A_fumigatus_Af293:3651038-3650223C, translated using codon table 1 (201 amino acids) Uncharacterized ORF; Putative HET-C2 protein; transcript induced by exposure to human airway epithelial cells	5.4	0.1791	1	2	3	3	201	22.2	6.95
Afu3g14490	Afu3g14490 AspGDID:ASPL0000105838 COORDS:Chr3_A_fumigatus_Af293:3844977-3843396C, translated using codon table 1 (508 amino acids) Uncharacterized ORF; Putative ketol acid reductoisomerase; transcript induced by exposure to human airway epithelial cells; no human homolog	7.09	0.1043	1	4	4	4	508	56.3	9.29
Afu3g14580	Afu3g14580 AspGDID:ASPL0000105847 COORDS:Chr3_A_fumigatus_Af293:3864307-3863777C, translated using codon table 1 (176 amino acids) Uncharacterized ORF; Has domain(s) with predicted hydrolase activity and role in dUTP metabolic process	0	0.2443	1	1	2	2	176	18.9	6.3
Afu3g14680	plb3 AspGDID:ASPL0000105858 COORDS:Chr3_A_fumigatus_Af293:3893246-3895138W, translated using codon table 1 (630 amino acids) Uncharacterized ORF; Putative secreted lysophospholipase B; transcript induced by lecithin and by voriconazole; hypoxia induced protein; induced by exposure to artemisinin	2.67	0.1524	1	2	5	5	630	67.4	5.66
Afu4g00150	Afu4g00150 AspGDID:ASPL0000105934 COORDS:Chr4_A_fumigatus_Af293:37684-35916C, translated using codon table 1 (537 amino acids) Uncharacterized ORF; Putative MFS maltose transporter; transcript up-regulated in conidia exposed to neutrophils	0	0.0912	1	1	3	5	537	59.7	8.16
Afu4g00330	Afu4g00330 AspGDID:ASPL0000105952 COORDS:Chr4_A_fumigatus_Af293:89040-87620C, translated using codon table 1 (461 amino acids) Uncharacterized ORF; Ortholog of <i>Aspergillus fumigatus A1163</i> : AFUB_100850 and <i>Aspergillus niger ATCC 1015</i> : 187232-mRNA	0	0.0933	1	1	2	2	461	49.7	5.68
Afu4g00530	Afu4g00530 AspGDID:ASPL0000105972 COORDS:Chr4_A_fumigatus_Af293:148802-139243C, translated using codon table 1 (3169 amino acids) Uncharacterized ORF; Ortholog of <i>A. nidulans FGSC A4</i> : AN9200, AN7637, <i>A. niger CBS 513.88</i> : An08g11390, An08g08230, An08g12160 and <i>Aspergillus wentii</i> : Aspwe1_0060194, Aspwe1_0120922	0	0.0934	1	1	17	18	3169	360	6.93
Afu4g00900	Afu4g00900 AspGDID:ASPL0000106009 COORDS:Chr4_A_fumigatus_Af293:247227-249385W, translated using codon table 1 (671 amino acids) Uncharacterized ORF; Ortholog of <i>Neosartorya fischeri NRRL 181</i> : NFIA_044600, <i>Aspergillus versicolor</i> : Aspve1_0367236, <i>Aspergillus sydowii</i> : Aspsy1_0473347 and <i>Aspergillus terreus NIH2624</i> : ATET_07537	0	0.1416	1	1	8	10	671	77.2	8.15
Afu4g03050	pfy1 AspGDID:ASPL0000106123 COORDS:Chr4_A_fumigatus_Af293:854319-853521C, translated using codon table 1 (131 amino acids) Uncharacterized ORF; Profilin	0	0.3359	1	1	2	2	131	13.9	5.48
Afu4g03322	Afu4g03322 AspGDID:ASPL0000365151 COORDS:Chr4_A_fumigatus_Af293:944673-943800C, translated using codon table 1 (257 amino acids) Uncharacterized ORF; Ortholog of <i>A. nidulans FGSC A4</i> : AN7177, <i>A. niger CBS 513.88</i> : An14g01990, <i>A. oryzae RIB40</i> : AO090011000139, <i>Aspergillus sydowii</i> : Aspsy1_0052594 and <i>Aspergillus terreus NIH2624</i> : ATET_02136	2.35	0.1362	1	3	3	3	257	28.9	4.87
Afu4g03880	Afu4g03880 AspGDID:ASPL0000106207 COORDS:Chr4_A_fumigatus_Af293:1090760-1092367W, translated using codon table 1 (251 amino acids) Uncharacterized ORF; 60S ribosomal protein L7	9.36	0.3705	1	7	7	7	251	29	10.04
Afu4g03930	Afu4g03930 AspGDID:ASPL0000106212 COORDS:Chr4_A_fumigatus_Af293:1103790-1105475W, translated using codon table 1 (526 amino acids) Uncharacterized ORF; Putative cysteine synthase B; transcript induced by exposure to human airway epithelial cells	39.78	0.5342	1	14	18	22	526	58.3	6.33
Afu4g03950	Afu4g03950 AspGDID:ASPL0000106214 COORDS:Chr4_A_fumigatus_Af293:1111453-1110005C, translated using codon table 1 (443 amino acids) Uncharacterized ORF; Ortholog(s) have cystathionine beta-lyase activity, role in 'de novo' L-methionine biosynthetic process, regulation of DNA methylation, transsulfuration and nucleus, peroxisome localization	0	0.1558	1	1	3	3	443	47.7	6.28
Afu4g04318	Afu4g04318 AspGDID:ASPL0000366886 COORDS:Chr4_A_fumigatus_Af293:1217563-1217111C, translated using codon table 1 (111 amino acids) Uncharacterized ORF; Ortholog of <i>A. nidulans FGSC A4</i> : AN7011, <i>A. niger CBS 513.88</i> : An14g00530, <i>Aspergillus wentii</i> : Aspwe1_0053203, <i>Aspergillus sydowii</i> : Aspsy1_0184132 and <i>Aspergillus terreus NIH2624</i> : ATET_02726	2.78	0.2523	1	2	2	2	111	11.3	7.39
Afu4g04410	Afu4g04410 AspGDID:ASPL0000106258 COORDS:Chr4_A_fumigatus_Af293:1247460-1248557W, translated using codon table 1 (319 amino acids) Uncharacterized ORF; Immunoreactive protein; has predicted 3-hydroxyacyl-CoA dehydrogenase activity, coenzyme binding, nucleotide binding activity and a putative role in fatty acid metabolism	2.07	0.4138	1	2	7	7	319	33.7	7.37
Afu4g04460	Afu4g04460 AspGDID:ASPL0000106264 COORDS:Chr4_A_fumigatus_Af293:1261402-1262578W, translated using codon table 1 (226 amino acids) Uncharacterized ORF; 60S ribosomal protein L13	0	0.2655	1	3	7	7	226	25.6	10.65
Afu4g04520	Afu4g04520 AspGDID:ASPL0000106270 COORDS:Chr4_A_fumigatus_Af293:1276859-1275057C, translated using codon table 1 (444 amino acids) Uncharacterized ORF; Ortholog(s) have mitochondrion localization	4.76	0.268	1	3	9	9	444	48	5.71
Afu4g05950	Afu4g05950 AspGDID:ASPL0000106312 COORDS:Chr4_A_fumigatus_Af293:1516600-1515969C, translated using codon table 1 (153 amino acids) Uncharacterized ORF; Ortholog(s) have disulfide oxidoreductase activity, role in cellular response to oxidative stress, response to osmotic stress and mitochondrial matrix localization	0	0.3464	1	1	4	5	153	17.1	7.39
Afu4g06130	Afu4g06130 AspGDID:ASPL0000106330 COORDS:Chr4_A_fumigatus_Af293:1572402-1571174C, translated using codon table 1 (295 amino acids) Uncharacterized ORF; Ortholog(s) have cytosol, nucleus localization	0	0.1424	1	1	3	3	295	32.7	5.16
Afu4g06390	Afu4g06390 AspGDID:ASPL0000106356 COORDS:Chr4_A_fumigatus_Af293:1638303-1639644W, translated using codon table 1 (333 amino acids) Uncharacterized ORF; Ortholog(s) have mitochondrion localization	0	0.2462	1	1	5	6	333	36.3	9.35
Afu4g06620	Afu4g06620 AspGDID:ASPL0000106377 COORDS:Chr4_A_fumigatus_Af293:1712343-1713780W, translated using codon table 1 (458 amino acids) Uncharacterized ORF; Glutamate/Leucine/Phenylalanine/Valine dehydrogenase; reacts with rabbit immunosera exposed to A. fumigatus conidia; hypoxia induced protein	0	0.1878	1	2	5	5	458	49.3	6.1
Afu4g06690	Afu4g06690 AspGDID:ASPL0000106383 COORDS:Chr4_A_fumigatus_Af293:1733950-1731132C, translated using codon table 1 (859 amino acids) Uncharacterized ORF; Ortholog(s) have nucleotide binding, ribonucleoside-diphosphate reductase activity, thioredoxin disulfide as acceptor activity	0	0.1746	1	2	9	9	859	96	6.67
Afu4g06820	ecm33 AspGDID:ASPL0000106396 COORDS:Chr4_A_fumigatus_Af293:1762211-1763534W, translated using codon table 1 (398 amino acids) Verified ORF; Putative glycophosphatidylinositol (GPI)-anchored cell wall protein with similarity to S. cerevisiae Ecm33p; mutant conidia display a cell separation defect; hypoxia induced protein	0	0.1181	1	1	3	3	398	41.5	4.98
Afu4g06830	Afu4g06830 AspGDID:ASPL0000106397 COORDS:Chr4_A_fumigatus_Af293:1765069-1764302C, translated using codon table 1 (190 amino acids) Uncharacterized ORF; Ortholog(s) have SUMO transferase activity and role in cellular response to DNA damage stimulus, hyphal growth, mitotic spindle elongation, protein sumoylation, regulation of mitotic cell cycle	2.38	0.3526	1	1	5	5	190	21.9	9.22
Afu4g06870	Afu4g06870 AspGDID:ASPL0000106401 COORDS:Chr4_A_fumigatus_Af293:1773548-1772080C, translated using codon table 1 (411 amino acids) Uncharacterized ORF; Ortholog of <i>A. nidulans FGSC A4</i> : AN4395, <i>A. niger CBS 513.88</i> : An04g01260, <i>A. oryzae RIB40</i> : AO090023000901, <i>Aspergillus wentii</i> : Aspwe1_0023285 and <i>Aspergillus sydowii</i> : Aspsy1_0545881	0	0.2019	1	1	5	6	411	47.1	6.62
Afu4g06950	Afu4g06950 AspGDID:ASPL0000106409 COORDS:Chr4_A_fumigatus_Af293:1799230-1797998C, translated using codon table 1 (284 amino acids) Uncharacterized ORF; Putative endoplasmic reticulum (ER) type II integral membrane protein with a predicted role in protein transport; transcript upregulated in response to amphotericin B	0	0.1831	1	1	3	3	284	30.9	6.14
Afu4g06980	Afu4g06980 AspGDID:ASPL0000106412 COORDS:Chr4_A_fumigatus_Af293:1808198-1805075C, translated using codon table 1 (853 amino acids) Uncharacterized ORF; Ortholog of <i>A. nidulans FGSC A4</i> : AN4429, <i>A. niger CBS 513.88</i> : An04g01380, <i>Neosartorya fischeri NRRL 181</i> : NFIA_109260, <i>Aspergillus wentii</i> : Aspwe1_0178925 and <i>Aspergillus versicolor</i> : Aspve1_0073345	0	0.1079	1	1	4	4	853	92.1	9.25
Afu4g07210	Afu4g07210 AspGDID:ASPL0000106435 COORDS:Chr4_A_fumigatus_Af293:1872976-1871931C, translated using codon table 1 (327 amino acids) Uncharacterized ORF; Mitochondrial acetolactate synthase small subunit; hypoxia induced protein; SrbA-regulated during hypoxia	0	0.1988	1	1	3	3	327	35.6	6.86
Afu4g07340	Afu4g07340 AspGDID:ASPL0000106448 COORDS:Chr4_A_fumigatus_Af293:1905396-1909011W, translated using codon table 1 (1088 amino acids) Uncharacterized ORF; Ortholog(s) have cytoplasm, nucleus localization	0	0.0928	1	1	4	4	1088	124.1	5.49
Afu4g07360	metH AspGDID:ASPL0000106450 COORDS:Chr4_A_fumigatus_Af293:1914045-1911526C, translated using codon table 1 (774 amino acids) Uncharacterized ORF; Putative cobalamin-independent methionine synthase; protein induced by heat shock; Yap1-dependent induction in response to hydrogen peroxide; reacts with rabbit immunosera exposed to A. fumigatus conidia; no human homolog	6.17	0.2158	1	6	12	18	774	86.8	6.79
Afu4g07435	Afu4g07435 AspGDID:ASPL0000106458 COORDS:Chr4_A_fumigatus_Af293:1932665-1931582C, translated using codon table 1 (166 amino acids) Uncharacterized ORF; 60S ribosomal protein L36	0	0.1687	2	2	3	3	166	19	11.91
Afu4g07650	cyp6 AspGDID:ASPL0000106480 COORDS:Chr4_A_fumigatus_Af293:1987776-1988776W, translated using codon table 1 (209 amino acids) Uncharacterized ORF; Putative peptidyl-prolyl cis-trans isomerase	0	0.2632	1	1	3	3	209	22.9	8.28
Afu4g07690	Afu4g07690 AspGDID:ASPL0000106484 COORDS:Chr4_A_fumigatus_Af293:2001294-2003380W, translated using codon table 1 (595 amino acids) Uncharacterized ORF; Putative phosphoribosylaminoimidazole-carboxamide formyltransferase/IMP cyclohydrolase; hypoxia repressed protein	0	0.2118	1	1	5	5	595	65	6.86
Afu4g07700	Afu4g07700 AspGDID:ASPL0000106485 COORDS:Chr4_A_fumigatus_Af293:2006286-2011744W, translated using codon table 1 (1679 amino acids) Uncharacterized ORF; Clathrin, heavy chain; transcript downregulated in response to amphotericin B	4.58	0.1471	1	7	15	16	1679	191.2	5.34
Afu4g07710	Afu4g07710 AspGDID:ASPL0000106486 COORDS:Chr4_A_fumigatus_Af293:2014380-2018024W, translated using codon table 1 (1193 amino acids) Uncharacterized ORF; Putative pyruvate carboxylase; protein induced by heat shock	6.66	0.1241	1	5	11	11	1193	131.2	6.7
Afu4g07730	Afu4g07730 AspGDID:ASPL0000106488 COORDS:Chr4_A_fumigatus_Af293:2023719-2022959C, translated using codon table 1 (176 amino acids) Uncharacterized ORF; 60S ribosomal protein L11; transcript induced by exposure to human airway epithelial cells	3.11	0.4545	1	2	5	5	176	20.1	10.02
Afu4g08330	Afu4g08330 AspGDID:ASPL0000106548 COORDS:Chr4_A_fumigatus_Af293:2158736-2160917W, translated using codon table 1 (680 amino acids) Uncharacterized ORF; Ortholog(s) have aspartate-tRNA ligase activity, role in mitochondrial aspartyl-tRNA aminoacylation and mitochondrion localization	0	0.1279	1	1	5	6	680	75.9	6.51
Afu4g08480	Afu4g08480 AspGDID:ASPL0000106562 COORDS:Chr4_A_fumigatus_Af293:2190795-2194480W, translated using codon table 1 (1140 amino acids) Uncharacterized ORF; Ortholog(s) have cytosol, nucleus localization	0	0.1298	1	1	9	9	1140	124.7	5.15
Afu4g08580	prx1 AspGDID:ASPL0000106571 COORDS:Chr4_A_fumigatus_Af293:2220262-2219313C, translated using codon table 1 (222 amino acids) Uncharacterized ORF; Mitochondrial peroxiredoxin; predicted role in cell redox homeostasis regulation; protein levels increase with amphotericin B and H2O2 exposure; transcript up-regulated in conidia exposed to neutrophils; repressed by gliotoxin exposure	12.58	0.5	1	7	9	10	222	24.5	6.14
Afu4g09010	Afu4g09010 AspGDID:ASPL0000106616 COORDS:Chr4_A_fumigatus_Af293:2336585-2339048W, translated using codon table 1 (597 amino acids) Uncharacterized ORF; Ortholog(s) have U1 snRNP localization	0	0.1876	1	1	6	6	597	68.2	5.26
Afu4g09030	Afu4g09030 AspGDID:ASPL0000106618 COORDS:Chr4_A_fumigatus_Af293:2345336-2342358C, translated using codon table 1 (953 amino acids) Verified ORF; Putative aminopeptidase; conidia-enriched protein; protein induced by heat shock; transcript induced by exposure to human airway epithelial cells; induced by gliotoxin exposure	0	0.1091	1	1	8	8	953	106.2	6.74
Afu4g09110	ccp1 AspGDID:ASPL0000106626 COORDS:Chr4_A_fumigatus_Af293:2379568-2378394C, translated using codon table 1 (366 amino acids) Uncharacterized ORF; Putative cytochrome c peroxidase; protein induced by heat shock and by hydrogen peroxide; transcript up-regulated in conidia exposed to neutrophils	2.55	0.3361	1	2	7	7	366	40.4	8.56
Afu4g09580	aspf2 AspGDID:ASPL0000106672 COORDS:Chr4_A_fumigatus_Af293:2497565-2498644W, translated using codon table 1 (314 amino acids) Verified ORF; Allergen Asp f 2; expressed in alkaline zinc-limiting conditions; shares a divergent promoter with zrfC; higher expression in biofilm vs planktonic cells; fibrinogen binding protein; signal peptide and 4 possible glycosylation sites	36.68	0.293	1	6	7	17	314	33.3	5.64
Afu4g10050	Afu4g10050 AspGDID:ASPL0000106719 COORDS:Chr4_A_fumigatus_Af293:2602022-2602919W, translated using codon table 1 (149 amino acids) Uncharacterized ORF; Calmodulin	2.62	0.3624	1	2	4	4	149	17	4.27
Afu4g10350	ubiD AspGDID:ASPL0000106749 COORDS:Chr4_A_fumigatus_Af293:2705133-2706130W, translated using codon table 1 (314 amino acids) Uncharacterized ORF; Polyubiquitin; calcium induced	2.64	0.3949	2	1	2	2	314	35.2	6.96
Afu4g10410	Afu4g10410 AspGDID:ASPL0000106755 COORDS:Chr4_A_fumigatus_Af293:2732043-2730416C, translated using codon table 1 (429 amino acids) Uncharacterized ORF; Putative aspartate aminotransferase; reacts with rabbit immunosera exposed to A. fumigatus conidia; hypoxia induced protein; transcript induced in conidia exposed to neutrophils or to human airway epithelial cells	3.23	0.1189	1	1	4	4	429	47	8.87
Afu4g10730	Afu4g10730 AspGDID:ASPL0000106786 COORDS:Chr4_A_fumigatus_Af293:2795549-2793995C, translated using codon table 1 (458 amino acids) Uncharacterized ORF; Ortholog(s) have ATP-dependent 3'-5' DNA helicase activity, ATP-dependent 5'-3' DNA helicase activity, sequence-specific DNA binding activity	1.75	0.1572	1	1	4	5	458	49.7	6.29
Afu4g10800	Afu4g10800 AspGDID:ASPL0000106793 COORDS:Chr4_A_fumigatus_Af293:2823433-2822224C, translated using codon table 1 (237 amino acids) Uncharacterized ORF; 40S ribosomal protein S6	1.82	0.308	1	3	8	8	237	27.3	10.84
Afu4g11080	facA AspGDID:ASPL0000106818 COORDS:Chr4_A_fumigatus_Af293:2893854-2891549C, translated using codon table 1 (670 amino acids) Uncharacterized ORF; Putative acetyl-coenzyme A synthetase with a predicted role in acetate metabolism; transcript up-regulated in conidia exposed to neutrophils; protein induced by heat shock; hypoxia repressed protein	4.16	0.2507	1	5	10	10	670	74.4	6.44
Afu4g11340	lys9 AspGDID:ASPL0000106843 COORDS:Chr4_A_fumigatus_Af293:2978580-2976809C, translated using codon table 1 (450 amino acids) Uncharacterized ORF; Saccharopine dehydrogenase; hypoxia induced protein; transcript induced by exposure to human airway epithelial cells	2.07	0.2289	1	3	7	7	450	49.4	6.28
Afu4g11650	kgd1 AspGDID:ASPL0000106873 COORDS:Chr4_A_fumigatus_Af293:3079845-3083210W, translated using codon table 1 (1057 amino acids) Uncharacterized ORF; Putative alpha-ketoglutarate dehydrogenase complex subunit; protein induced by heat shock	3.16	0.1135	1	1	8	8	1057	118.8	6.95
Afu4g11730	gldB AspGDID:ASPL0000106881 COORDS:Chr4_A_fumigatus_Af293:3102011-3103045W, translated using codon table 1 (325 amino acids) Verified ORF; Putative glycerol dehydrogenase; calcium induced; transcript induced by exposure to human airway epithelial cells	2.25	0.2646	1	2	5	5	325	36.8	6.37
Afu4g12060	Afu4g12060 AspGDID:ASPL0000106913 COORDS:Chr4_A_fumigatus_Af293:3170893-3172683W, translated using codon table 1 (349 amino acids) Uncharacterized ORF; Ortholog(s) have role in ascospore formation, cellular response to biotic stimulus and cellular response to starvation, <a href="#GOsection">more</a>	2.63	0.1232	1	1	4	5	349	40.5	8.05
Afu4g12400	Afu4g12400 AspGDID:ASPL0000106947 COORDS:Chr4_A_fumigatus_Af293:3245797-3248607W, translated using codon table 1 (836 amino acids) Uncharacterized ORF; Has domain(s) with predicted zinc ion binding activity	0	0.0957	1	1	5	5	836	93.8	8.12
Afu4g12450	Afu4g12450 AspGDID:ASPL0000106952 COORDS:Chr4_A_fumigatus_Af293:3270803-3272689W, translated using codon table 1 (541 amino acids) Uncharacterized ORF; Putative PH domain protein; conserved lysine-rich protein; Yap1-dependent induction in response to hydrogen peroxide; hypoxia repressed protein	14.74	0.2421	1	9	12	14	541	57	5.03
Afu4g12870	Afu4g12870 AspGDID:ASPL0000106993 COORDS:Chr4_A_fumigatus_Af293:3368445-3370387W, translated using codon table 1 (602 amino acids) Uncharacterized ORF; Putative methylmalonate-semialdehyde dehydrogenase; transcript up-regulated in conidia exposed to neutrophils	0	0.0864	1	1	4	5	602	63.8	8.03
Afu4g13120	Afu4g13120 AspGDID:ASPL0000107018 COORDS:Chr4_A_fumigatus_Af293:3436372-3434668C, translated using codon table 1 (358 amino acids) Uncharacterized ORF; Putative glutamine synthetase; protein induced by heat shock and by hydrogen peroxide; transcript induced by exposure to human airway epithelial cells	3.07	0.2598	1	4	6	7	358	39.9	5.71
Afu4g13170	cpcB AspGDID:ASPL0000107023 COORDS:Chr4_A_fumigatus_Af293:3449811-3448364C, translated using codon table 1 (316 amino acids) Verified ORF; G-protein complex beta subunit; conidia-enriched protein; immunoreactive	3.79	0.2437	1	6	6	6	316	35	6.52
Afu4g13500	Afu4g13500 AspGDID:ASPL0000107056 COORDS:Chr4_A_fumigatus_Af293:3533782-3531610C, translated using codon table 1 (528 amino acids) Uncharacterized ORF; Putative aldehyde dehydrogenase; transcript up-regulated in conidia exposed to neutrophils	2.26	0.0985	1	1	4	4	528	58.1	8.78
Afu4g13700	Afu4g13700 AspGDID:ASPL0000107076 COORDS:Chr4_A_fumigatus_Af293:3586027-3588483W, translated using codon table 1 (737 amino acids) Uncharacterized ORF; Ortholog(s) have cytosol localization	0	0.1289	1	1	6	6	737	84.4	7.09
Afu4g13720	mpkA AspGDID:ASPL0000107078 COORDS:Chr4_A_fumigatus_Af293:3591547-3593138W, translated using codon table 1 (424 amino acids) Verified ORF; Mitogen-activated protein kinase; activated by phosphorylation; role in cell wall signaling and the oxidative stress response; mpkA(p)-lacZ expression increased by cell wall disturbing compounds; required for adaptation to iron starvation	0	0.1179	1	2	3	3	424	48.4	5.88
Afu5g01030	Afu5g01030 AspGDID:ASPL0000107285 COORDS:Chr5_A_fumigatus_Af293:267439-266294C, translated using codon table 1 (332 amino acids) Uncharacterized ORF; Putative glyceraldehyde 3-phosphate dehydrogenase; predicted gene pair with AFUA_5G01970 (gpdA); hypoxia induced protein	3.98	0.2801	1	4	7	7	332	36.1	6.62
Afu5g01440	Afu5g01440 AspGDID:ASPL0000107324 COORDS:Chr5_A_fumigatus_Af293:377687-376891C, translated using codon table 1 (202 amino acids) Uncharacterized ORF; Ortholog(s) have thioredoxin peroxidase activity, role in cell redox homeostasis, cellular response to oxidative stress, response to metal ion and peroxisome, plasma membrane localization	6.08	0.2475	1	4	4	4	202	21.9	8.35
Afu5g01480	Afu5g01480 AspGDID:ASPL0000107328 COORDS:Chr5_A_fumigatus_Af293:383966-385567W, translated using codon table 1 (533 amino acids) Uncharacterized ORF; Has domain(s) with predicted hydrolase activity, acting on carbon-nitrogen (but not peptide) bonds activity	0	0.122	1	1	4	4	533	58.1	5.03
Afu5g01860	Afu5g01860 AspGDID:ASPL0000107366 COORDS:Chr5_A_fumigatus_Af293:473984-473076C, translated using codon table 1 (188 amino acids) Uncharacterized ORF; Ortholog(s) have role in Arp2/3 complex-mediated actin nucleation, actin cortical patch localization, cellular response to drug, endocytosis and establishment of mitochondrion localization, <a href="#GOsection">more</a>	1.87	0.1383	1	1	2	2	188	21.1	6.8
Afu5g01970	gpdA AspGDID:ASPL0000107377 COORDS:Chr5_A_fumigatus_Af293:503797-505194W, translated using codon table 1 (338 amino acids) Verified ORF; Glyceraldehyde-3-phosphate dehydrogenase; predicted gene pair with AFUA_5G01030; protein induced by hydrogen peroxide; reacts with rabbit immunosera exposed to A. fumigatus conidia: induced by L-tyrosine	36.89	0.6213	1	11	14	20	338	36.3	7.43
Afu5g02090	Afu5g02090 AspGDID:ASPL0000107389 COORDS:Chr5_A_fumigatus_Af293:531520-531007C, translated using codon table 1 (144 amino acids) Uncharacterized ORF; Ortholog(s) have role in meiotic chromosome segregation and cytosol, nucleus localization	0	0.2222	1	1	2	2	144	16.3	7.5
Afu5g02230	Afu5g02230 AspGDID:ASPL0000107403 COORDS:Chr5_A_fumigatus_Af293:571103-569414C, translated using codon table 1 (545 amino acids) Uncharacterized ORF; Putative actin interacting protein; protein induced by hydrogen peroxide	2.63	0.1339	1	1	3	3	545	60.3	6.28
Afu5g02360	Afu5g02360 AspGDID:ASPL0000107416 COORDS:Chr5_A_fumigatus_Af293:608651-606106C, translated using codon table 1 (698 amino acids) Uncharacterized ORF; Ortholog(s) have role in hyphal growth, peroxisome organization, vacuole organization and Golgi apparatus localization	0	0.1361	1	3	7	8	698	78.1	8.18
Afu5g02370	Afu5g02370 AspGDID:ASPL0000107417 COORDS:Chr5_A_fumigatus_Af293:611752-609421C, translated using codon table 1 (686 amino acids) Uncharacterized ORF; Vacuolar ATP synthase catalytic subunit A; hypoxia induced protein; putative essential gene; induced by exposure to human airway epithelial cells	6.97	0.1545	1	4	6	6	686	74.9	6.19
Afu5g02450	erg20 AspGDID:ASPL0000107425 COORDS:Chr5_A_fumigatus_Af293:631975-633093W, translated using codon table 1 (347 amino acids) Uncharacterized ORF; Putative polyprenyl synthetase; farnesyl-pyrophosphate synthetase; SrbA-regulated during hypoxia	2.24	0.17	1	1	4	4	347	39.7	5.5
Afu5g02470	nmt1 AspGDID:ASPL0000107427 COORDS:Chr5_A_fumigatus_Af293:638154-636920C, translated using codon table 1 (342 amino acids) Uncharacterized ORF; Thiamine biosynthesis protein, phoB-regulated; protein induced by H2O2; reacts with rabbit immunosera exposed to conidia; hypoxia induced protein; transcript induced by exposure to human airway epithelial cells; induced by gliotoxin	3.31	0.3596	1	4	7	8	342	38.3	6.44
Afu5g03020	Afu5g03020 AspGDID:ASPL0000107481 COORDS:Chr5_A_fumigatus_Af293:806662-808051W, translated using codon table 1 (373 amino acids) Uncharacterized ORF; 60S ribosomal protein L4	8.79	0.2574	1	5	8	8	373	40.5	10.96
Afu5g03080	aspC AspGDID:ASPL0000107487 COORDS:Chr5_A_fumigatus_Af293:834771-833226C, translated using codon table 1 (384 amino acids) Uncharacterized ORF; Putative septin; hypoxia repressed protein; repressed by exposure to artemisinin	1.77	0.0938	2	2	3	3	384	44.4	8.73
Afu5g03490	ndk1 AspGDID:ASPL0000107527 COORDS:Chr5_A_fumigatus_Af293:944280-943353C, translated using codon table 1 (153 amino acids) Uncharacterized ORF; Putative nucleoside diphosphate kinase; induced by L-tyrosine	6.97	0.5294	1	3	6	6	153	16.9	7.97
Afu5g03560	Afu5g03560 AspGDID:ASPL0000107534 COORDS:Chr5_A_fumigatus_Af293:963324-960949C, translated using codon table 1 (715 amino acids) Uncharacterized ORF; Putative glutamyl-tRNA synthetase; transcript induced by exposure to human airway epithelial cells	2.31	0.0601	1	1	3	3	715	81.4	7.53
Afu5g03690	Afu5g03690 AspGDID:ASPL0000107547 COORDS:Chr5_A_fumigatus_Af293:987794-986454C, translated using codon table 1 (424 amino acids) Uncharacterized ORF; Ortholog(s) have phosphatidylinositol transporter activity	4.04	0.2429	1	2	7	8	424	46.1	4.84
Afu5g03990	lap4 AspGDID:ASPL0000107577 COORDS:Chr5_A_fumigatus_Af293:1064415-1065965W, translated using codon table 1 (516 amino acids) Uncharacterized ORF; Vacuolar aspartyl aminopeptidase; induced by growth on BSA as a sole nitrogen source	0	0.1143	1	2	4	4	516	56	7.08
Afu5g04170	hsp90 AspGDID:ASPL0000107596 COORDS:Chr5_A_fumigatus_Af293:1108402-1110583W, translated using codon table 1 (706 amino acids) Verified ORF; Heat shock protein; allergen Asp f 12; likely essential; required for conidiation and cell wall integrity; transcript induced by growth on hydrogen peroxide; enters the nucleus in response to heat shock	19.93	0.3088	1	11	18	20	706	80.6	5.01
Afu5g04210	Afu5g04210 AspGDID:ASPL0000107600 COORDS:Chr5_A_fumigatus_Af293:1122054-1123659W, translated using codon table 1 (460 amino acids) Uncharacterized ORF; Putative ubiquinol-cytochrome C reductase complex core protein 2; hypoxia induced protein	2.55	0.2283	1	2	6	6	460	48.1	8.91
Afu5g04230	cit1 AspGDID:ASPL0000107602 COORDS:Chr5_A_fumigatus_Af293:1129170-1127276C, translated using codon table 1 (474 amino acids) Verified ORF; Putative citrate synthase; reacts with rabbit immunosera exposed to A. fumigatus conidia; transcript induced by exposure to human airway epithelial cells	6.28	0.2257	1	3	6	6	474	52.1	8.57
Afu5g04320	Afu5g04320 AspGDID:ASPL0000107611 COORDS:Chr5_A_fumigatus_Af293:1159452-1158435C, translated using codon table 1 (201 amino acids) Uncharacterized ORF; Ortholog(s) have GTPase activity and role in ER to Golgi vesicle-mediated transport, Golgi organization, cellular response to drug, cellular response to nitrogen starvation, negative regulation of G0 to G1 transition, protein secretion	2.19	0.1741	2	3	3	3	201	22.3	5.27
Afu5g05450	rps1 AspGDID:ASPL0000107624 COORDS:Chr5_A_fumigatus_Af293:1266407-1265371C, translated using codon table 1 (256 amino acids) Uncharacterized ORF; 40S ribosomal protein S3Ae; 40S ribosomal protein S1; reacts with rabbit immunosera exposed to A. fumigatus conidia	16.72	0.4648	1	8	10	12	256	29.2	10.04
Afu5g05490	Afu5g05490 AspGDID:ASPL0000107628 COORDS:Chr5_A_fumigatus_Af293:1274938-1276745W, translated using codon table 1 (474 amino acids) Uncharacterized ORF; Ortholog(s) have cytosol localization	0	0.1519	1	1	5	6	474	54.2	6.43
Afu5g05500	Afu5g05500 AspGDID:ASPL0000107629 COORDS:Chr5_A_fumigatus_Af293:1277444-1278887W, translated using codon table 1 (424 amino acids) Uncharacterized ORF; Ortholog(s) have phosphoglycerate dehydrogenase activity, role in serine family amino acid biosynthetic process and cytosol localization	1.85	0.2311	1	1	6	6	424	45.9	7.01
Afu5g05540	nap1 AspGDID:ASPL0000107632 COORDS:Chr5_A_fumigatus_Af293:1289638-1291216W, translated using codon table 1 (411 amino acids) Uncharacterized ORF; Putative nucleosome assembly protein	5.18	0.1995	1	4	6	7	411	46.8	4.55
Afu5g05630	Afu5g05630 AspGDID:ASPL0000107640 COORDS:Chr5_A_fumigatus_Af293:1313445-1312542C, translated using codon table 1 (154 amino acids) Uncharacterized ORF; 60S ribosomal protein L23	2.31	0.2403	1	1	3	3	154	17.1	10.33
Afu5g05680	Afu5g05680 AspGDID:ASPL0000107645 COORDS:Chr5_A_fumigatus_Af293:1322763-1324274W, translated using codon table 1 (464 amino acids) Uncharacterized ORF; Ortholog(s) have translation release factor activity, codon specific activity and role in asexual sporulation resulting in formation of a cellular spore, cellular response to nitrogen starvation, cytokinesis, translational termination	0	0.0991	1	1	3	3	464	51.9	6.48
Afu5g05710	Afu5g05710 AspGDID:ASPL0000107648 COORDS:Chr5_A_fumigatus_Af293:1330422-1332169W, translated using codon table 1 (487 amino acids) Uncharacterized ORF; Ortholog(s) have pseudouridine synthase activity	0	0.0287	1	1	2	2	487	54.7	8.59
Afu5g05930	Afu5g05930 AspGDID:ASPL0000107670 COORDS:Chr5_A_fumigatus_Af293:1392342-1393619W, translated using codon table 1 (425 amino acids) Uncharacterized ORF; Ortholog(s) have rRNA primary transcript binding activity	0	0.0871	1	1	4	5	425	48.6	9.69
Afu5g06060	skpA AspGDID:ASPL0000107683 COORDS:Chr5_A_fumigatus_Af293:1441806-1442525W, translated using codon table 1 (158 amino acids) Verified ORF; Putative sulfur metabolism regulator; higher expression in 48 h biofilm vs planktonic cells	0	0.3101	1	1	3	3	158	18.1	4.48
Afu5g06130	Afu5g06130 AspGDID:ASPL0000107690 COORDS:Chr5_A_fumigatus_Af293:1465997-1464574C, translated using codon table 1 (331 amino acids) Uncharacterized ORF; Succinyl-CoA synthetase alpha subunit; hypoxia induced protein	0	0.2477	1	1	4	4	331	34.6	8.63
Afu5g06360	Afu5g06360 AspGDID:ASPL0000107712 COORDS:Chr5_A_fumigatus_Af293:1531695-1530676C, translated using codon table 1 (254 amino acids) Uncharacterized ORF; 60S ribosomal protein L8; transcript induced by exposure to human airway epithelial cells	0	0.2441	1	3	4	4	254	27.5	10.98
Afu5g06680	gatA AspGDID:ASPL0000107744 COORDS:Chr5_A_fumigatus_Af293:1641603-1643263W, translated using codon table 1 (499 amino acids) Uncharacterized ORF; 4-aminobutyrate aminotransferase; transcript downregulated in response to voriconazole; calcium induced	0	0.0621	1	1	2	2	499	55.2	8.94
Afu5g07020	Afu5g07020 AspGDID:ASPL0000107777 COORDS:Chr5_A_fumigatus_Af293:1738915-1740843W, translated using codon table 1 (622 amino acids) Uncharacterized ORF; Ribosome biogenesis ABC transporter	4.32	0.1495	1	2	7	8	622	69.7	6.65
Afu5g07120	Afu5g07120 AspGDID:ASPL0000107787 COORDS:Chr5_A_fumigatus_Af293:1769812-1771261W, translated using codon table 1 (352 amino acids) Uncharacterized ORF; RNP domain protein; reacts with rabbit immunosera exposed to A. fumigatus conidia	0	0.196	1	1	5	5	352	37.1	9.16
Afu5g07300	Afu5g07300 AspGDID:ASPL0000107804 COORDS:Chr5_A_fumigatus_Af293:1814759-1815768W, translated using codon table 1 (260 amino acids) Uncharacterized ORF; Electron transfer flavoprotein, beta subunit	2.39	0.1269	1	1	3	3	260	28.2	8.97
Afu5g07330	cp1 AspGDID:ASPL0000107807 COORDS:Chr5_A_fumigatus_Af293:1825083-1826968W, translated using codon table 1 (613 amino acids) Uncharacterized ORF; Putative carboxypeptidase S1; predicted signal sequence for secretion	4.14	0.1354	1	2	4	4	613	68.3	4.87
Afu5g08090	pyroA AspGDID:ASPL0000107881 COORDS:Chr5_A_fumigatus_Af293:2051048-2050001C, translated using codon table 1 (308 amino acids) Uncharacterized ORF; Putative pyridoxine biosynthesis protein	10.82	0.2403	1	5	6	7	308	32.7	6.43
Afu5g08120	argJ AspGDID:ASPL0000107884 COORDS:Chr5_A_fumigatus_Af293:2055133-2056632W, translated using codon table 1 (466 amino acids) Uncharacterized ORF; Arginine biosynthesis bifunctional protein; SrbA-regulated during hypoxiano human homolog	0	0.1824	1	1	4	4	466	48.9	6.13
Afu5g08270	Afu5g08270 AspGDID:ASPL0000107899 COORDS:Chr5_A_fumigatus_Af293:2100834-2100024C, translated using codon table 1 (244 amino acids) Uncharacterized ORF; Putative HAD superfamily hydrolase; hypoxia repressed protein	0	0.1025	1	1	2	2	244	27.3	5.05
Afu5g08290	Afu5g08290 AspGDID:ASPL0000107901 COORDS:Chr5_A_fumigatus_Af293:2105292-2104352C, translated using codon table 1 (283 amino acids) Uncharacterized ORF; Ortholog(s) have intracellular localization	0	0.0777	1	1	2	2	283	31.4	6.7
Afu5g08370	Afu5g08370 AspGDID:ASPL0000107909 COORDS:Chr5_A_fumigatus_Af293:2127746-2125218C, translated using codon table 1 (790 amino acids) Uncharacterized ORF; Ortholog(s) have role in proteasome-mediated ubiquitin-dependent protein catabolic process and cytoplasm, nucleus localization	0	0.1304	1	1	4	4	790	84.9	5.39
Afu5g08540	aspA AspGDID:ASPL0000107925 COORDS:Chr5_A_fumigatus_Af293:2167838-2169399W, translated using codon table 1 (382 amino acids) Verified ORF; Septin; hypoxia repressed protein; repressed by exposure to artemisinin	6.65	0.2827	1	7	8	8	382	43.3	5.14
Afu5g08830	hexA AspGDID:ASPL0000107954 COORDS:Chr5_A_fumigatus_Af293:2265787-2268175W, translated using codon table 1 (537 amino acids) Verified ORF; Putative woronin body protein; hypoxia repressed protein	4.8	0.121	1	3	6	6	537	61.4	8.79
Afu5g09210	alp2 AspGDID:ASPL0000107990 COORDS:Chr5_A_fumigatus_Af293:2366798-2365176C, translated using codon table 1 (495 amino acids) Verified ORF; Autophagic (vacuolar) serine protease; allergen Asp f 18; predicted signal sequence for secretion; transcript induced by growth on hydrogen peroxide; transcript up-regulated in conidia exposed to neutrophils	13.24	0.2505	1	4	9	10	495	52.6	6.25
Afu5g09230	Afu5g09230 AspGDID:ASPL0000107992 COORDS:Chr5_A_fumigatus_Af293:2377061-2378400W, translated using codon table 1 (324 amino acids) Verified ORF; Putative transaldolase; abundant protein in conidia and mycelia; protein induced by hydrogen peroxide and hypoxia	27.35	0.5586	1	14	14	15	324	35.4	6.44
Afu5g09250	Afu5g09250 AspGDID:ASPL0000107994 COORDS:Chr5_A_fumigatus_Af293:2380881-2384038W, translated using codon table 1 (980 amino acids) Uncharacterized ORF; Ortholog(s) have cytosol localization	0	0.1643	1	1	9	10	980	108.6	6.29
Afu5g09330	cipC AspGDID:ASPL0000108002 COORDS:Chr5_A_fumigatus_Af293:2402867-2402275C, translated using codon table 1 (130 amino acids) Verified ORF; CipC-like, hyphal-specific protein; not concanamycin A or stress induced as it is in A. nidulans; reacts with rabbit immunosera exposed to A. fumigatus conidia	6.9	0.5692	1	3	6	8	130	15	6.27
Afu5g09360	calA AspGDID:ASPL0000108005 COORDS:Chr5_A_fumigatus_Af293:2410482-2408570C, translated using codon table 1 (558 amino acids) Verified ORF; Calcineurin A catalytic subunit; required for normal growth, cell wall integrity, conidiation and virulence	2.23	0.1541	1	3	5	5	558	63.8	5.86
Afu5g10370	sdh2 AspGDID:ASPL0000108103 COORDS:Chr5_A_fumigatus_Af293:2655836-2654821C, translated using codon table 1 (299 amino acids) Uncharacterized ORF; Iron-sulfur protein subunit of succinate dehydrogenase with a predicted role in the citric acid cycle; transcript up-regulated in conidia exposed to neutrophils; induced by exposure to artemisinin; transcript downregulated by hypoxia	1.78	0.3311	1	3	7	7	299	33.9	8.92
Afu5g10550	Afu5g10550 AspGDID:ASPL0000108119 COORDS:Chr5_A_fumigatus_Af293:2702208-2700129C, translated using codon table 1 (519 amino acids) Uncharacterized ORF; ATP synthase F1, beta subunit; reacts with rabbit immunosera exposed to A. fumigatus conidia; hypoxia induced protein	10.92	0.3353	1	7	14	15	519	55.6	5.44
Afu5g10570	Afu5g10570 AspGDID:ASPL0000108121 COORDS:Chr5_A_fumigatus_Af293:2705752-2704997C, translated using codon table 1 (154 amino acids) Verified ORF; Cofilin	6.07	0.3961	1	2	4	5	154	17	5.66
Afu5g10650	Afu5g10650 AspGDID:ASPL0000108129 COORDS:Chr5_A_fumigatus_Af293:2725117-2723747C, translated using codon table 1 (412 amino acids) Uncharacterized ORF; Has domain(s) with predicted FMN binding, oxidoreductase activity, oxidoreductase activity, acting on the CH-NH2 group of donors, pyridoxamine-phosphate oxidase activity	0	0.0922	1	1	2	2	412	45.9	6.25
Afu5g10780	uge5 AspGDID:ASPL0000108140 COORDS:Chr5_A_fumigatus_Af293:2756278-2757615W, translated using codon table 1 (371 amino acids) Verified ORF; UDP-glucose 4-epimerase required for galactose metabolism; hypoxia induced protein	17.03	0.3423	1	9	9	12	371	40.6	6.25
Afu5g11230	rasA AspGDID:ASPL0000108182 COORDS:Chr5_A_fumigatus_Af293:2871589-2870648C, translated using codon table 1 (213 amino acids) Verified ORF; Ras family GTPase protein	3.16	0.3099	1	3	5	5	213	23.9	5.06
Afu5g11320	aspf29 AspGDID:ASPL0000108191 COORDS:Chr5_A_fumigatus_Af293:2903022-2902611C, translated using codon table 1 (110 amino acids) Verified ORF; Allergen Asp f 29; putative thioredoxin	4.64	0.5	1	3	4	4	110	12	5.22
Afu5g11330	Afu5g11330 AspGDID:ASPL0000108192 COORDS:Chr5_A_fumigatus_Af293:2907439-2905067C, translated using codon table 1 (790 amino acids) Uncharacterized ORF; Ortholog of <i>A. nidulans FGSC A4</i> : AN0168, <i>A. niger CBS 513.88</i> : An01g02510, <i>A. oryzae RIB40</i> : AO090026000707, <i>Aspergillus wentii</i> : Aspwe1_0075145 and <i>Aspergillus sydowii</i> : Aspsy1_0027709	0	0.1228	1	1	4	4	790	88.7	8.32
Afu5g11360	Afu5g11360 AspGDID:ASPL0000108195 COORDS:Chr5_A_fumigatus_Af293:2919103-2921760W, translated using codon table 1 (843 amino acids) Uncharacterized ORF; Ortholog(s) have role in Golgi to vacuole transport, protein targeting to vacuole and AP-3 adaptor complex localization	0	0.1281	1	1	6	6	843	94.3	5.16
Afu5g11380	Afu5g11380 AspGDID:ASPL0000108197 COORDS:Chr5_A_fumigatus_Af293:2924786-2923943C, translated using codon table 1 (197 amino acids) Uncharacterized ORF; Putative Rho-GDP dissociation inhibitor; transcript and protein levels increased in response to amphotericin B	3.04	0.2335	1	2	2	2	197	22.3	5.91
Afu5g11430	Afu5g11430 AspGDID:ASPL0000108202 COORDS:Chr5_A_fumigatus_Af293:2936781-2937984W, translated using codon table 1 (382 amino acids) Verified ORF; Putative quinone oxidoreductase; conidia-enriched protein; hypoxia repressed protein	0	0.0654	1	2	2	2	382	41.4	8.9
Afu5g12180	Afu5g12180 AspGDID:ASPL0000108274 COORDS:Chr5_A_fumigatus_Af293:3157322-3158399W, translated using codon table 1 (247 amino acids) Uncharacterized ORF; Ortholog(s) have Ran GTPase binding activity and role in G1/S transition of mitotic cell cycle, RNA export from nucleus, Ran protein signal transduction, protein import into nucleus, ubiquitin-dependent protein catabolic process	2.98	0.2065	1	2	3	3	247	27.6	4.98
Afu5g12260	tigA AspGDID:ASPL0000108282 COORDS:Chr5_A_fumigatus_Af293:3183118-3184297W, translated using codon table 1 (368 amino acids) Uncharacterized ORF; Putative disulfide isomerase	0	0.1495	1	2	4	4	368	40.2	6.44
Afu5g12780	Afu5g12780 AspGDID:ASPL0000108332 COORDS:Chr5_A_fumigatus_Af293:3352075-3353129W, translated using codon table 1 (332 amino acids) Uncharacterized ORF; Ortholog of <i>A. nidulans FGSC A4</i> : AN8430, <i>A. niger CBS 513.88</i> : An18g00330, <i>A. oryzae RIB40</i> : AO090010000134, <i>Neosartorya fischeri NRRL 181</i> : NFIA_074390 and <i>Aspergillus wentii</i> : Aspwe1_0449405	5.59	0.497	1	7	10	10	332	35.8	5.31
Afu5g12840	Afu5g12840 AspGDID:ASPL0000108338 COORDS:Chr5_A_fumigatus_Af293:3362965-3361748C, translated using codon table 1 (246 amino acids) Verified ORF; Putative hydroxyacylglutathione hydrolase; conidia-enriched protein; transcript up-regulated in conidia exposed to neutrophils	0	0.1667	1	1	3	3	246	27.3	6.65
Afu5g13450	Afu5g13450 AspGDID:ASPL0000108398 COORDS:Chr5_A_fumigatus_Af293:3535793-3536876W, translated using codon table 1 (249 amino acids) Verified ORF; Putative triosephosphate isomerase; protein abundant in conidia; reacts with rabbit immunosera exposed to A. fumigatus conidia' transcript induced by exposure to human airway epithelial cells	16.78	0.4378	1	7	7	9	249	27.1	5.8
Afu5g13920	wos2 AspGDID:ASPL0000108443 COORDS:Chr5_A_fumigatus_Af293:3643780-3644692W, translated using codon table 1 (201 amino acids) Uncharacterized ORF; Putative Hsp90 binding co-chaperone; reacts with rabbit immunosera exposed to A. fumigatus conidia	2.58	0.194	1	2	3	3	201	22.2	4.48
Afu5g14550	Afu5g14550 AspGDID:ASPL0000108504 COORDS:Chr5_A_fumigatus_Af293:3773275-3776489W, translated using codon table 1 (1055 amino acids) Uncharacterized ORF; Ortholog(s) have role in lactose metabolic process	0	0.1336	1	1	7	8	1055	118.2	6.02
Afu5g14930	Afu5g14930 AspGDID:ASPL0000108541 COORDS:Chr5_A_fumigatus_Af293:3864521-3863218C, translated using codon table 1 (413 amino acids) Uncharacterized ORF; Protein of unknown function; predicted gene pair with AFUA_1G16030	0	0.0751	1	1	2	3	413	45.7	4.78
Afu6g00660	Afu6g00660 AspGDID:ASPL0000108620 COORDS:Chr6_A_fumigatus_Af293:170160-171220W, translated using codon table 1 (322 amino acids) Uncharacterized ORF; Ortholog(s) have role in asperthecin biosynthetic process	3.77	0.3292	1	4	7	7	322	35.8	5.52
Afu6g01830	Afu6g01830 AspGDID:ASPL0000108638 COORDS:Chr6_A_fumigatus_Af293:254352-253595C, translated using codon table 1 (231 amino acids) Uncharacterized ORF; Has domain(s) with predicted O-methyltransferase activity	0	0.1558	1	1	2	2	231	25.1	6.29
Afu6g01940	Afu6g01940 AspGDID:ASPL0000108649 COORDS:Chr6_A_fumigatus_Af293:282872-284077W, translated using codon table 1 (317 amino acids) Uncharacterized ORF; Dienelactone hydrolase family protein; transcript up-regulated in conidia exposed to neutrophils	0	0.2776	1	2	7	7	317	35	8.59
Afu6g02230	glkA AspGDID:ASPL0000108678 COORDS:Chr6_A_fumigatus_Af293:395467-393918C, translated using codon table 1 (493 amino acids) Verified ORF; Putative glucokinase; conidia-enriched protein; transcripts extremely abundant in resting conidia, levels decline during germination; transcript induced by exposure to human airway epithelial cells	7.07	0.215	1	6	9	10	493	54.4	5.5
Afu6g02280	aspf3 AspGDID:ASPL0000108683 COORDS:Chr6_A_fumigatus_Af293:408478-407732C, translated using codon table 1 (168 amino acids) Verified ORF; Allergen Asp f 3; peroxiredoxin family reductase; putative peroxismal membrane protein; IgE binding; protein induced by heat shock and by exposure to hydrogen peroxide; hypoxia induced protein; induced by gliotoxin exposure	12.54	0.5298	1	5	7	8	168	18.4	5.58
Afu6g02440	Afu6g02440 AspGDID:ASPL0000108699 COORDS:Chr6_A_fumigatus_Af293:459025-459857W, translated using codon table 1 (160 amino acids) Uncharacterized ORF; 60s ribosomal protein L24; ortholog of <i>S. cerevisiae</i> RPL24A and RPL24B; transcript induced by exposure to human airway epithelial cells	1.9	0.1188	1	2	2	2	160	18	11.31
Afu6g02470	Afu6g02470 AspGDID:ASPL0000108702 COORDS:Chr6_A_fumigatus_Af293:466824-464770C, translated using codon table 1 (582 amino acids) Uncharacterized ORF; Putative fumarate hydratase; reacts with rabbit immunosera exposed to A. fumigatus conidia	0	0.1649	1	1	5	6	582	63.1	8.97
Afu6g02630	Afu6g02630 AspGDID:ASPL0000108718 COORDS:Chr6_A_fumigatus_Af293:512097-510055C, translated using codon table 1 (441 amino acids) Uncharacterized ORF; Ortholog(s) have ATP-dependent RNA helicase activity	4.23	0.0726	1	2	2	2	441	49.6	5.82
Afu6g02750	egd1 AspGDID:ASPL0000108730 COORDS:Chr6_A_fumigatus_Af293:559767-558922C, translated using codon table 1 (186 amino acids) Uncharacterized ORF; Nascent polypeptide-associated complex (NAC) subunit beta; protein level decreases upon heat shock	0	0.1989	1	1	2	2	186	20.5	5.44
Afu6g02800	Afu6g02800 AspGDID:ASPL0000108735 COORDS:Chr6_A_fumigatus_Af293:570866-570078C, translated using codon table 1 (242 amino acids) Verified ORF; Putative glycosylphosphatidylinositol (GPI)-anchored protein; transcript up-regulated in hyphae upon exposure to neutrophils	0	0.343	1	1	3	3	242	24.6	4.77
Afu6g02860	Afu6g02860 AspGDID:ASPL0000108742 COORDS:Chr6_A_fumigatus_Af293:588115-590205W, translated using codon table 1 (602 amino acids) Uncharacterized ORF; Putative isocitrate lyase with a predicted role in the glyoxylate cycle; transcript up-regulated in conidia exposed to neutrophils; no human homolog	0	0.0847	1	1	3	3	602	66.6	7.65
Afu6g03025	Afu6g03025 AspGDID:ASPL0000362635 COORDS:Chr6_A_fumigatus_Af293:629031-629639W, translated using codon table 1 (202 amino acids) Uncharacterized ORF; Ortholog of <i>A. nidulans FGSC A4</i> : AN1656, <i>Neosartorya fischeri NRRL 181</i> : NFIA_049360, <i>Aspergillus wentii</i> : Aspwe1_0175985, <i>Aspergillus versicolor</i> : Aspve1_0037520 and <i>Aspergillus zonatus</i> : Aspzo1_0144926	4.75	0.1584	1	2	2	2	202	22.2	4.92
Afu6g03252	Afu6g03252 AspGDID:ASPL0000364017 COORDS:Chr6_A_fumigatus_Af293:688416-692348W, translated using codon table 1 (1281 amino acids) Uncharacterized ORF; Has domain(s) with predicted ATP binding, protein kinase activity, protein tyrosine kinase activity, transferase activity, transferring phosphorus-containing groups activity and role in protein phosphorylation	0	0.0945	1	1	8	12	1281	141.5	5.47
Afu6g03640	Afu6g03640 AspGDID:ASPL0000108819 COORDS:Chr6_A_fumigatus_Af293:797393-795920C, translated using codon table 1 (436 amino acids) Uncharacterized ORF; Ortholog(s) have role in biotin biosynthetic process and peroxisome localization	0	0.156	1	1	3	3	436	48.1	7.99
Afu6g03730	Afu6g03730 AspGDID:ASPL0000108828 COORDS:Chr6_A_fumigatus_Af293:823850-821958C, translated using codon table 1 (558 amino acids) Uncharacterized ORF; 2-methylcitrate dehydratase; hypoxia repressed protein; transcript up-regulated in conidia exposed to neutrophils and to human airway epithelial cells; no human homolog	3.63	0.1953	1	2	5	8	558	62.1	8.37
Afu6g03820	egd2 AspGDID:ASPL0000108837 COORDS:Chr6_A_fumigatus_Af293:841323-840546C, translated using codon table 1 (204 amino acids) Uncharacterized ORF; Nascent polypeptide-associated complex subunit alpha; predicted role in 'de novo' cotranslational protein folding; enriched in dormant conidia	3.12	0.2794	1	1	4	5	204	22	4.94
Afu6g04100	Afu6g04100 AspGDID:ASPL0000108865 COORDS:Chr6_A_fumigatus_Af293:927432-925052C, translated using codon table 1 (735 amino acids) Uncharacterized ORF; Has domain(s) with predicted role in centromere complex assembly and kinetochore localization	0	0.0694	1	1	3	3	735	82.1	8.03
Afu6g04430	Afu6g04430 AspGDID:ASPL0000108897 COORDS:Chr6_A_fumigatus_Af293:1013586-1012672C, translated using codon table 1 (228 amino acids) Uncharacterized ORF; Ortholog(s) have acireductone dioxygenase (Ni2+-requiring) activity, role in L-methionine biosynthetic process from methylthioadenosine and cytosol, nucleus localization	0	0.1009	1	1	2	2	228	26.3	6.24
Afu6g04570	Afu6g04570 AspGDID:ASPL0000108911 COORDS:Chr6_A_fumigatus_Af293:1060589-1062452W, translated using codon table 1 (482 amino acids) Uncharacterized ORF; Putative translational elongation factor eEF-1 gamma subunit; protein induced by heat shock; transcript induced by exposure to human airway epithelial cells; snoRNA Afu-328 encoded within intron 2	8.35	0.2822	1	5	9	9	482	54.1	7.64
Afu6g04740	act1 AspGDID:ASPL0000108928 COORDS:Chr6_A_fumigatus_Af293:1114434-1113100C, translated using codon table 1 (393 amino acids) Verified ORF; Actin	6.79	0.3206	1	5	7	9	393	43.9	6.28
Afu6g04800	Afu6g04800 AspGDID:ASPL0000108934 COORDS:Chr6_A_fumigatus_Af293:1125396-1124178C, translated using codon table 1 (281 amino acids) Uncharacterized ORF; Ortholog(s) have role in response to purine-containing compound and cytoplasm, nucleus localization	0	0.1815	1	1	4	4	281	30.7	9.17
Afu6g04920	fdh AspGDID:ASPL0000108946 COORDS:Chr6_A_fumigatus_Af293:1161764-1163212W, translated using codon table 1 (418 amino acids) Verified ORF; Putative NAD-dependent formate dehydrogenase; protein more abundant in conidia than mycelia; transcript up-regulated in conidia exposed to neutrophils; protein induced by heat shock; SrbA-regulated during hypoxia	0	0.1005	1	1	3	3	418	45.7	8.27
Afu6g04970	Afu6g04970 AspGDID:ASPL0000108951 COORDS:Chr6_A_fumigatus_Af293:1181194-1182540W, translated using codon table 1 (428 amino acids) Uncharacterized ORF; Ortholog(s) have O-phospho-L-serine:2-oxoglutarate aminotransferase activity, role in L-serine biosynthetic process, purine nucleobase biosynthetic process and cytosol localization	8.57	0.2804	1	5	10	12	428	46.9	6.81
Afu6g05120	Afu6g05120 AspGDID:ASPL0000108967 COORDS:Chr6_A_fumigatus_Af293:1221763-1223363W, translated using codon table 1 (394 amino acids) Uncharacterized ORF; Ortholog(s) have protein serine/threonine kinase activity, role in activation of bipolar cell growth, protein phosphorylation, regulation of cytokinesis, regulation of mitotic sister chromatid segregation and cytosol, nucleus localization	0	0.0863	1	1	2	2	394	45.1	8.37
Afu6g05150	Afu6g05150 AspGDID:ASPL0000108970 COORDS:Chr6_A_fumigatus_Af293:1231600-1234035W, translated using codon table 1 (588 amino acids) Uncharacterized ORF; Ortholog(s) have histone binding, transcription corepressor activity	0	0.1531	1	1	4	4	588	64	6.9
Afu6g05200	Afu6g05200 AspGDID:ASPL0000108975 COORDS:Chr6_A_fumigatus_Af293:1248660-1249485W, translated using codon table 1 (157 amino acids) Uncharacterized ORF; 60S ribosomal protein L28	4	0.1975	1	2	2	2	157	17	10.83
Afu6g05210	Afu6g05210 AspGDID:ASPL0000108976 COORDS:Chr6_A_fumigatus_Af293:1250905-1252499W, translated using codon table 1 (330 amino acids) Verified ORF; Putative NAD-dependent malate dehydrogenase with a predicted role in the citric acid cycle; transcript up-regulated in conidia exposed to neutrophils; phoB-regulated; reacts with rabbit immunosera exposed to A. fumigatus conidia	16.15	0.6909	1	10	13	14	330	34.8	7.24
Afu6g06340	gfa1 AspGDID:ASPL0000108994 COORDS:Chr6_A_fumigatus_Af293:1344619-1347035W, translated using codon table 1 (694 amino acids) Uncharacterized ORF; Ortholog(s) have glutamine-fructose-6-phosphate transaminase (isomerizing) activity	2.23	0.1787	1	1	9	9	694	77.2	6.7
Afu6g06345	Afu6g06345 AspGDID:ASPL0000108995 COORDS:Chr6_A_fumigatus_Af293:1347575-1348344W, translated using codon table 1 (205 amino acids) Uncharacterized ORF; Ortholog(s) have 6,7-dimethyl-8-ribityllumazine synthase activity, role in riboflavin biosynthetic process and mitochondrial intermembrane space, nucleus localization	2.21	0.2585	1	2	3	3	205	21.5	6.1
Afu6g06370	Afu6g06370 AspGDID:ASPL0000108998 COORDS:Chr6_A_fumigatus_Af293:1367479-1369026W, translated using codon table 1 (386 amino acids) Uncharacterized ORF; NAD(+)-isocitrate dehydrogenase subunit I	2.02	0.215	1	1	5	5	386	41.9	8.75
Afu6g06540	Afu6g06540 AspGDID:ASPL0000109015 COORDS:Chr6_A_fumigatus_Af293:1422544-1416733C, translated using codon table 1 (1872 amino acids) Uncharacterized ORF; Ortholog(s) have protein complex scaffold activity	2.22	0.1635	1	1	16	17	1872	206.2	5.92
Afu6g06750	Afu6g06750 AspGDID:ASPL0000109037 COORDS:Chr6_A_fumigatus_Af293:1474803-1476209W, translated using codon table 1 (272 amino acids) Uncharacterized ORF; 14-3-3 family protein; predicted gene pair with AFUA_2G03290 (artA)	11.21	0.4007	1	3	9	10	272	30.7	4.92
Afu6g06770	aspf22 AspGDID:ASPL0000109039 COORDS:Chr6_A_fumigatus_Af293:1480347-1478847C, translated using codon table 1 (438 amino acids) Verified ORF; Putative enolase; allergen Asp f 22; conidia-enriched protein; transcript induced by growth on hydrogen peroxide; hypoxia induced protein; transcript induced by exposure to human airway epithelial cells	37.43	0.4703	1	13	15	20	438	47.3	5.58
Afu6g06780	rpt4 AspGDID:ASPL0000109040 COORDS:Chr6_A_fumigatus_Af293:1481801-1483206W, translated using codon table 1 (393 amino acids) Uncharacterized ORF; Proteasome regulatory particle subunit; transcript induced by exposure to human airway epithelial cells	0	0.1679	1	1	4	4	393	44.1	5.81
Afu6g06870	Afu6g06870 AspGDID:ASPL0000109049 COORDS:Chr6_A_fumigatus_Af293:1514458-1511030C, translated using codon table 1 (523 amino acids) Uncharacterized ORF; Ortholog(s) have magnesium ion binding, protein serine/threonine kinase activity	2.53	0.1491	1	3	4	4	523	58.7	9.6
Afu6g06900	rho1 AspGDID:ASPL0000109052 COORDS:Chr6_A_fumigatus_Af293:1523942-1524891W, translated using codon table 1 (193 amino acids) Verified ORF; Putative Rho-type GTPase; predominantly localize to the hyphal tip; involved in radial growth and conidiation; mutants display cytoplasmic leakage at the hyphal tips	0	0.285	1	2	3	3	193	21.7	6.77
Afu6g07420	Afu6g07420 AspGDID:ASPL0000109104 COORDS:Chr6_A_fumigatus_Af293:1673498-1674942W, translated using codon table 1 (461 amino acids) Uncharacterized ORF; Ortholog of <i>A. nidulans FGSC A4</i> : AN5209, <i>A. niger CBS 513.88</i> : An07g09010, <i>A. oryzae RIB40</i> : AO090005001558, <i>Aspergillus wentii</i> : Aspwe1_0516548 and <i>Aspergillus sydowii</i> : Aspsy1_0156708	2.02	0.1518	1	1	5	6	461	52.4	5.86
Afu6g07430	Afu6g07430 AspGDID:ASPL0000109105 COORDS:Chr6_A_fumigatus_Af293:1677465-1679554W, translated using codon table 1 (527 amino acids) Uncharacterized ORF; Putative pyruvate kinase; reacts with rabbit immunosera exposed to A. fumigatus conidia	4.82	0.2751	1	5	10	10	527	58.3	7.03
Afu6g07770	Afu6g07770 AspGDID:ASPL0000109137 COORDS:Chr6_A_fumigatus_Af293:1773673-1775224W, translated using codon table 1 (501 amino acids) Uncharacterized ORF; Putative alanine aminotransferase	4.34	0.1816	1	4	6	6	501	55.1	5.96
Afu6g08010	Afu6g08010 AspGDID:ASPL0000109161 COORDS:Chr6_A_fumigatus_Af293:1856089-1857903W, translated using codon table 1 (575 amino acids) Uncharacterized ORF; Ortholog of <i>A. nidulans FGSC A4</i> : AN3956, <i>A. niger CBS 513.88</i> : An11g02120, <i>A. oryzae RIB40</i> : AO090003001561, <i>Aspergillus wentii</i> : Aspwe1_0055020 and <i>Aspergillus sydowii</i> : Aspsy1_0149662	0	0.0922	1	1	4	5	575	62.1	9.16
Afu6g08050	gnd1 AspGDID:ASPL0000109165 COORDS:Chr6_A_fumigatus_Af293:1868427-1870349W, translated using codon table 1 (491 amino acids) Verified ORF; 6-phosphogluconate dehydrogenase; conidia-enriched protein; protein induced by heat shock; reacts with rabbit immunosera exposed to conidia; hypoxia-induced protein; transcript induced by exposure to human airway epithelial cells	26.43	0.444	1	12	14	16	491	54.1	5.94
Afu6g08660	Afu6g08660 AspGDID:ASPL0000109222 COORDS:Chr6_A_fumigatus_Af293:2052348-2048629C, translated using codon table 1 (1239 amino acids) Uncharacterized ORF; Ortholog of <i>A. nidulans</i> AN3906; hypoxia repressed protein	1.72	0.0839	1	4	7	9	1239	131.8	5.1
Afu6g09140	Afu6g09140 AspGDID:ASPL0000109269 COORDS:Chr6_A_fumigatus_Af293:2170604-2169605C, translated using codon table 1 (291 amino acids) Uncharacterized ORF; Has domain(s) with predicted oxidoreductase activity and role in metabolic process	2.11	0.2337	1	2	3	3	291	31.2	5.47
Afu6g09160	Afu6g09160 AspGDID:ASPL0000109271 COORDS:Chr6_A_fumigatus_Af293:2174009-2172909C, translated using codon table 1 (211 amino acids) Uncharacterized ORF; Has domain(s) with predicted acid-amino acid ligase activity	0	0.237	1	1	2	2	211	24	4.6
Afu6g09920	Afu6g09920 AspGDID:ASPL0000109348 COORDS:Chr6_A_fumigatus_Af293:2439681-2441534W, translated using codon table 1 (617 amino acids) Uncharacterized ORF; Ortholog of <i>A. nidulans FGSC A4</i> : AN10946, <i>A. niger CBS 513.88</i> : An11g07970, <i>A. oryzae RIB40</i> : AO090001000626, <i>Neosartorya fischeri NRRL 181</i> : NFIA_055650 and <i>Aspergillus wentii</i> : Aspwe1_0045804	2.4	0.1767	1	1	6	6	617	65.3	9.57
Afu6g09980	ncr1 AspGDID:ASPL0000109354 COORDS:Chr6_A_fumigatus_Af293:2454280-2458241W, translated using codon table 1 (1273 amino acids) Uncharacterized ORF; Putative sphingolipid transporter; transcript up-regulated in conidia exposed to neutrophils	0	0.132	1	1	7	7	1273	140.3	5.48
Afu6g10260	akr1 AspGDID:ASPL0000109382 COORDS:Chr6_A_fumigatus_Af293:2540226-2538892C, translated using codon table 1 (334 amino acids) Verified ORF; Putative aldehyde reductase; abundant protein in conidia; transcript up-regulated in conidia exposed to neutrophils and to human airway epithelial cells	14.98	0.5659	1	8	10	11	334	37.2	6.47
Afu6g10450	Afu6g10450 AspGDID:ASPL0000109400 COORDS:Chr6_A_fumigatus_Af293:2589859-2590745W, translated using codon table 1 (248 amino acids) Uncharacterized ORF; Ortholog of <i>Aspergillus fumigatus A1163</i> : AFUB_076500	0	0.0968	1	1	2	3	248	26.7	9.23
Afu6g10650	Afu6g10650 AspGDID:ASPL0000109420 COORDS:Chr6_A_fumigatus_Af293:2633292-2631089C, translated using codon table 1 (657 amino acids) Uncharacterized ORF; Putative ATP citrate lyase, subunit 1; protein induced by heat shock	14.13	0.2816	1	7	11	12	657	71.9	8.48
Afu6g10660	Afu6g10660 AspGDID:ASPL0000109421 COORDS:Chr6_A_fumigatus_Af293:2635628-2637150W, translated using codon table 1 (486 amino acids) Uncharacterized ORF; Putative ATP citrate lyase subunit; repressed by gliotoxin exposure22405895	6.07	0.2016	1	7	7	7	486	52.9	6.27
Afu6g10990	Afu6g10990 AspGDID:ASPL0000109452 COORDS:Chr6_A_fumigatus_Af293:2708263-2706119C, translated using codon table 1 (695 amino acids) Uncharacterized ORF; Ortholog(s) have NADPH-hemoprotein reductase activity, role in cellular response to drug and endoplasmic reticulum localization	0	0.1482	1	2	7	8	695	76.7	5.58
Afu6g11260	Afu6g11260 AspGDID:ASPL0000109476 COORDS:Chr6_A_fumigatus_Af293:2786302-2787411W, translated using codon table 1 (266 amino acids) Uncharacterized ORF; Ribosomal protein L26; transcript induced by exposure to human airway epithelial cells	0	0.1992	1	2	3	3	266	29.6	10.98
Afu6g11430	aldA AspGDID:ASPL0000109492 COORDS:Chr6_A_fumigatus_Af293:2837140-2839051W, translated using codon table 1 (559 amino acids) Verified ORF; Putative aldehyde dehydrogenase; predicted gene pair with AFUA_7G01000; hypoxia repressed protein; transcript up-regulated in conidia exposed to neutrophils; immunoreactive protein	0	0.1216	1	1	5	5	559	60.9	6.73
Afu6g11850	Afu6g11850 AspGDID:ASPL0000109531 COORDS:Chr6_A_fumigatus_Af293:2961275-2962537W, translated using codon table 1 (397 amino acids) Uncharacterized ORF; Protein of unknown function; hypoxia induced protein	5.46	0.1738	1	2	5	5	397	44.2	8.48
Afu6g12050	nrps11 AspGDID:ASPL0000109550 COORDS:Chr6_A_fumigatus_Af293:3013593-3017507W, translated using codon table 1 (1160 amino acids) Verified ORF; Putative non-ribosomal peptide synthetase (NRPS); member of the fumiquinazoline biosynthetic cluster; essential for fumigaclavine C biosynthesis; transcript downregulated in response to voriconazole	0	0.0793	1	1	4	5	1160	128.7	6.05
Afu6g12170	fkbp1 AspGDID:ASPL0000109562 COORDS:Chr6_A_fumigatus_Af293:3060448-3061084W, translated using codon table 1 (112 amino acids) Uncharacterized ORF; Putative FK506-binding protein (FKBP)-type peptidyl-prolyl cis-trans isomerase; transcript induced by exposure to human airway epithelial cells	3.77	0.4286	1	4	4	4	112	12.1	7.25
Afu6g12300	Afu6g12300 AspGDID:ASPL0000109574 COORDS:Chr6_A_fumigatus_Af293:3095007-3092936C, translated using codon table 1 (478 amino acids) Verified ORF; RNP domain protein; conidia-enriched protein	2.84	0.2887	1	7	11	14	478	51.7	9.55
Afu6g12500	Afu6g12500 AspGDID:ASPL0000109594 COORDS:Chr6_A_fumigatus_Af293:3156604-3155495C, translated using codon table 1 (220 amino acids) Uncharacterized ORF; Ortholog(s) have cytosol, mitochondrion, nucleus localization	7.56	0.4227	1	4	5	5	220	23.7	8.38
Afu6g12580	Afu6g12580 AspGDID:ASPL0000109601 COORDS:Chr6_A_fumigatus_Af293:3181167-3179379C, translated using codon table 1 (517 amino acids) Uncharacterized ORF; Ortholog(s) have anthranilate synthase activity, role in cleistothecium development, tryptophan biosynthetic process and anthranilate synthase complex, cytosol, nucleus localization	5.93	0.1412	1	5	5	5	517	57	6.01
Afu6g12630	Afu6g12630 AspGDID:ASPL0000109606 COORDS:Chr6_A_fumigatus_Af293:3191249-3194824W, translated using codon table 1 (1127 amino acids) Uncharacterized ORF; Ortholog(s) have aminoacyl-tRNA editing activity, leucine-tRNA ligase activity, role in leucyl-tRNA aminoacylation, regulation of TOR signaling and cytosol localization	0	0.087	1	2	7	7	1127	127.1	6.74
Afu6g12660	Afu6g12660 AspGDID:ASPL0000109609 COORDS:Chr6_A_fumigatus_Af293:3198955-3199723W, translated using codon table 1 (155 amino acids) Uncharacterized ORF; 40S ribosomal protein S10b; protein level decreases upon heat shock	1.76	0.2323	1	1	3	4	155	17.8	9.73
Afu6g12740	Afu6g12740 AspGDID:ASPL0000109617 COORDS:Chr6_A_fumigatus_Af293:3219940-3220875W, translated using codon table 1 (245 amino acids) Uncharacterized ORF; Dienelactone hydrolase family protein	4.4	0.1755	1	3	3	3	245	26.9	6.64
Afu6g12930	acoA AspGDID:ASPL0000109636 COORDS:Chr6_A_fumigatus_Af293:3262693-3265559W, translated using codon table 1 (787 amino acids) Verified ORF; Mitochondrial aconitate hydratase; citric acid cycle enzyme; protein abundant in conidia; transcript induced in conidia exposed to neutrophils; reacts with rabbit immunosera exposed to A. fumigatus conidia; hypoxia induced	17.03	0.2452	1	13	16	16	787	85.5	6.71
Afu6g12990	Afu6g12990 AspGDID:ASPL0000109642 COORDS:Chr6_A_fumigatus_Af293:3280512-3279334C, translated using codon table 1 (263 amino acids) Uncharacterized ORF; Putative cytosolic large ribosomal subunit protein L7A	9.08	0.3118	1	5	6	8	263	29.4	10.26
Afu6g13200	atg2 AspGDID:ASPL0000109662 COORDS:Chr6_A_fumigatus_Af293:3337415-3344051W, translated using codon table 1 (2139 amino acids) Uncharacterized ORF; Autophagy regulatory protein; transcript up-regulated in conidia exposed to neutrophils	0	0.0477	1	1	7	7	2139	233.2	5.26
Afu6g13250	Afu6g13250 AspGDID:ASPL0000109666 COORDS:Chr6_A_fumigatus_Af293:3354774-3355600W, translated using codon table 1 (123 amino acids) Uncharacterized ORF; 60S ribosomal protein L31e; transcript induced by exposure to human airway epithelial cells	2.04	0.2276	1	1	3	3	123	14	10.49
Afu6g13300	Afu6g13300 AspGDID:ASPL0000109671 COORDS:Chr6_A_fumigatus_Af293:3377042-3376007C, translated using codon table 1 (215 amino acids) Uncharacterized ORF; GTP-Binding nuclear protein Ran	4.87	0.307	1	3	5	5	215	24.1	7.39
Afu6g13490	Afu6g13490 AspGDID:ASPL0000109690 COORDS:Chr6_A_fumigatus_Af293:3433612-3431912C, translated using codon table 1 (515 amino acids) Uncharacterized ORF; Putative glutamate decarboxylase; predicted gene pair with AFUA_8G06020; SrbA-regulated during hypoxia	1.81	0.2447	1	4	8	9	515	58.9	6.24
Afu6g13540	cp3 AspGDID:ASPL0000109695 COORDS:Chr6_A_fumigatus_Af293:3447061-3448745W, translated using codon table 1 (543 amino acids) Uncharacterized ORF; Carboxypeptidase Y; predicted signal sequence for secretion; transcript up-regulated in conidia exposed to neutrophils; induced by growth on BSA as a sole nitrogen source	5.25	0.1805	1	5	6	6	543	60.9	5.8
Afu6g13550	Afu6g13550 AspGDID:ASPL0000109696 COORDS:Chr6_A_fumigatus_Af293:3450087-3449278C, translated using codon table 1 (155 amino acids) Uncharacterized ORF; Ribosomal protein S13p/S18e	3.64	0.1226	1	2	2	2	155	17.9	10.45
Afu6g13670	Afu6g13670 AspGDID:ASPL0000109708 COORDS:Chr6_A_fumigatus_Af293:3483620-3485062W, translated using codon table 1 (338 amino acids) Uncharacterized ORF; Ortholog(s) have role in cellular protein localization, endoplasmic reticulum tubular network maintenance, nuclear pore complex assembly, regulation of cytokinesis, site selection	0	0.0799	1	1	3	3	338	37.7	6.19
Afu6g14470	Afu6g14470 AspGDID:ASPL0000109785 COORDS:Chr6_A_fumigatus_Af293:3678960-3678210C, translated using codon table 1 (234 amino acids) Uncharacterized ORF; Ortholog of <i>A. nidulans FGSC A4</i> : AN5353, <i>A. niger CBS 513.88</i> : An02g05680, <i>A. oryzae RIB40</i> : AO090103000108, <i>Aspergillus wentii</i> : Aspwe1_0131073 and <i>Aspergillus sydowii</i> : Aspsy1_0050268	0	0.0897	1	1	2	2	234	26	4.54
Afu7g00250	tub2 AspGDID:ASPL0000109824 COORDS:Chr7_A_fumigatus_Af293:70221-71948W, translated using codon table 1 (448 amino acids) Uncharacterized ORF; Tubulin beta-2 subunit; predicted gene pair with AFUA_1G10910 (tubA)	7.56	0.1451	1	1	4	5	448	49.9	4.98
Afu7g00350	Afu7g00350 AspGDID:ASPL0000109834 COORDS:Chr7_A_fumigatus_Af293:99535-100896W, translated using codon table 1 (453 amino acids) Uncharacterized ORF; Putative NAD-dependent dehydrogenase; protein induced by hydrogen peroxide; transcript up-regulated in conidia exposed to neutrophils	0	0.1391	1	1	3	3	453	49.6	9.17
Afu7g01000	Afu7g01000 AspGDID:ASPL0000109896 COORDS:Chr7_A_fumigatus_Af293:269163-267518C, translated using codon table 1 (493 amino acids) Uncharacterized ORF; Putative alcohol dehydrogenase involved in ethanol metabolism; predicted gene pair with AFUA_6G11430 (aldA); increased expression in biofilm; induced by L-tyrosine; induced in neutrophil-exposed conidia; repressed by gliotoxin exposure	0	0.1318	1	1	5	6	493	53.7	6.61
Afu7g01460	Afu7g01460 AspGDID:ASPL0000109941 COORDS:Chr7_A_fumigatus_Af293:380737-379723C, translated using codon table 1 (259 amino acids) Uncharacterized ORF; Ribosomal protein S5	8.45	0.3822	1	6	8	10	259	28.3	10.54
Afu7g01510	Afu7g01510 AspGDID:ASPL0000109946 COORDS:Chr7_A_fumigatus_Af293:396163-397190W, translated using codon table 1 (279 amino acids) Uncharacterized ORF; Ortholog(s) have role in ascospore-type prospore membrane assembly and Golgi apparatus, hyphal tip, plasma membrane, prospore membrane localization	2.61	0.1254	1	2	3	12	279	31.3	5.63
Afu7g01830	ugp1 AspGDID:ASPL0000109978 COORDS:Chr7_A_fumigatus_Af293:488718-487183C, translated using codon table 1 (511 amino acids) Verified ORF; UTP-glucose-1-phosphate uridylyltransferase; induced by hydrogen peroxide; hypoxia repressed protein	12.88	0.3855	1	9	15	16	511	56.9	6.87
Afu7g01840	Afu7g01840 AspGDID:ASPL0000109979 COORDS:Chr7_A_fumigatus_Af293:496331-491364C, translated using codon table 1 (1522 amino acids) Uncharacterized ORF; Ortholog(s) have Golgi apparatus, cell tip, cytoplasmic vesicle, endoplasmic reticulum, plasma membrane localization	2.19	0.134	1	3	12	12	1522	168.4	6.21
Afu7g02070	nfr1 AspGDID:ASPL0000110002 COORDS:Chr7_A_fumigatus_Af293:555550-557341W, translated using codon table 1 (558 amino acids) Verified ORF; AIF-like mitochondrial oxidoreductase; conidia-enriched protein	2.72	0.1452	1	2	6	7	558	59.8	7.65
Afu7g02140	Afu7g02140 AspGDID:ASPL0000110009 COORDS:Chr7_A_fumigatus_Af293:573601-574445W, translated using codon table 1 (133 amino acids) Uncharacterized ORF; 40S ribosomal protein S24	0	0.203	1	2	2	2	133	15.3	10.74
Afu7g02230	Afu7g02230 AspGDID:ASPL0000110018 COORDS:Chr7_A_fumigatus_Af293:599410-600851W, translated using codon table 1 (418 amino acids) Uncharacterized ORF; Ortholog(s) have mRNA binding activity, role in arginine catabolic process, positive regulation of cellular response to oxidative stress, positive regulation of nuclear-transcribed mRNA poly(A) tail shortening and cytosol localization	6.08	0.2297	1	4	6	8	418	44.8	5.76
Afu7g02310	Afu7g02310 AspGDID:ASPL0000110026 COORDS:Chr7_A_fumigatus_Af293:629238-628529C, translated using codon table 1 (217 amino acids) Uncharacterized ORF; Putative adenine phosphoribosyltransferase 1; transcript induced by exposure to human airway epithelial cells; induced by gliotoxin exposure	1.8	0.1889	1	2	3	3	217	23.6	6.39
Afu7g03800	Afu7g03800 AspGDID:ASPL0000110075 COORDS:Chr7_A_fumigatus_Af293:840467-838652C, translated using codon table 1 (547 amino acids) Uncharacterized ORF; Ortholog of <i>A. nidulans FGSC A4</i> : AN4273, <i>A. niger CBS 513.88</i> : An13g00220, <i>A. oryzae RIB40</i> : AO090026000834, <i>Aspergillus wentii</i> : Aspwe1_0026252 and <i>Aspergillus sydowii</i> : Aspsy1_1088954	6.29	0.234	1	7	11	11	547	61.8	8.06
Afu7g03970	Afu7g03970 AspGDID:ASPL0000110092 COORDS:Chr7_A_fumigatus_Af293:892169-892894W, translated using codon table 1 (220 amino acids) Uncharacterized ORF; Ortholog of <i>A. nidulans FGSC A4</i> : AN4260, AN5290, AN1561, AN1493, AN7323, <i>A. fumigatus Af293</i> : Afu7g00970, Afu8g04890 and <i>A. niger CBS 513.88</i> : An16g07920, An01g14810	0	0.0955	1	1	2	2	220	22.7	4.68
Afu7g03980	Afu7g03980 AspGDID:ASPL0000110093 COORDS:Chr7_A_fumigatus_Af293:893752-895260W, translated using codon table 1 (468 amino acids) Uncharacterized ORF; Ortholog(s) have role in translational initiation and cytosol, eukaryotic 43S preinitiation complex, eukaryotic translation initiation factor 3 complex, eIF3m, nucleus localization	1.91	0.1709	1	1	5	5	468	51.1	5.06
Afu7g04130	Afu7g04130 AspGDID:ASPL0000110108 COORDS:Chr7_A_fumigatus_Af293:931445-933615W, translated using codon table 1 (702 amino acids) Uncharacterized ORF; Ortholog(s) have polynucleotide adenylyltransferase activity, ribosomal large subunit binding activity	0	0.1097	1	1	4	4	702	78.4	9.13
Afu7g04190	Afu7g04190 AspGDID:ASPL0000110114 COORDS:Chr7_A_fumigatus_Af293:948503-946680C, translated using codon table 1 (519 amino acids) Uncharacterized ORF; Ortholog(s) have methyltransferase activity, role in cellular response to biotic stimulus, filamentous growth, glucosylceramide biosynthetic process, pathogenesis and plasma membrane localization	0	0.1368	1	1	4	4	519	58.9	6.87
Afu7g04210	Afu7g04210 AspGDID:ASPL0000110116 COORDS:Chr7_A_fumigatus_Af293:951859-952611W, translated using codon table 1 (161 amino acids) Uncharacterized ORF; Putative tropomyosin 1; protein induced by hydrogen peroxide; reacts with rabbit immunosera exposed to A. fumigatus conidia	5.57	0.3354	1	3	6	6	161	18.8	5.03
Afu7g05250	Afu7g05250 AspGDID:ASPL0000110218 COORDS:Chr7_A_fumigatus_Af293:1244785-1248464W, translated using codon table 1 (1205 amino acids) Uncharacterized ORF; Ortholog(s) have histone acetyltransferase activity, methylated histone binding activity, role in histone acetylation and NuA3 histone acetyltransferase complex, cytoplasm localization	0	0.1469	1	1	13	16	1205	133.2	5.87
[truncated: 31 more rows]

## Sheet: Wild-type 48 hs_1
Acession	Description	Score	Coverage	# Proteins	#Unique Peptides	#Peptides	#PSMs	#Aas	MW kDa	calc. pI
[truncated: 213 more rows]

## Sheet: Wild-type 48 hs_2
Acession	Description	Score	Coverage	# Proteins	#Unique Peptides	#Peptides	#PSMs	#Aas	MW kDa	calc. pI
[truncated: 20 more rows]

## Sheet: Wild-type 48 hs_3
Acession	Description	Score	Coverage	# Proteins	#Unique Peptides	#Peptides	#PSMs	#Aas	MW kDa	calc. pI
[truncated: 362 more rows]

[truncated: 22 more sheets: Wild-type 72 hs-1, Wild-type 72 hs_2 , Wild-type-72 hs_3, GliT 24 hs_1, GliT 24 hs_2, GliT 24 hs_3, GliT 48 hs_1, GliT 48 hs_2, GliT 48 hs_3, GliT 72 hs_1, GliT 72 hs_2, GliT 72 hs_3, GtmA 24 hs_1, GtmA 24 hs_2, GtmA 24 hs_3, GtmA 48 hs_1, GtmA 48 hs_2, GtmA 48 hs_3, GtmA 72 hs_1, GtmA 72 hs_2 …]
